# Supplementary material for: Genome-Wide Profiling of Histone H3 Lysine 4 and Lysine 27 Trimethylation Reveals an Epigenetic Signature in Prostate Carcinogenesis
Source: PLoS One. 2009 Mar 5;4(3):e4687. doi: 10.1371/journal.pone.0004687 (PMC2650415; doi:10.1371/journal.pone.0004687)
Supplement: Table S1 — Epigenetic genes changed in prostate cancer and benign tissues (0.03 MB XLS) [file pone.0004687.s002.xls]

## Sheet: Sheet1
Probe name	Gene name	Systematic name	Description	P-value	Fold change Tumor/benign
A_23_P259641	EZH2	NM_004456	Homo sapiens enhancer of zeste homolog 2 (Drosophila) (EZH2), transcript variant 1, mRNA [NM_004456]	1.46639e-13	2.30405
A_32_P103291	SMYD3	NM_022743	Homo sapiens SET and MYND domain containing 3 (SMYD3), mRNA [NM_022743]	3.03307e-10	1.61129
A_23_P154500	DNMT3A	NM_175629	Homo sapiens DNA (cytosine-5-)-methyltransferase 3 alpha (DNMT3A), transcript variant 1, mRNA [NM_175629]	1.46639e-13	1.56696
A_24_P2463	WHSC1	NM_133336	Homo sapiens Wolf-Hirschhorn syndrome candidate 1 (WHSC1), transcript variant 9, mRNA [NM_133336]	3.03307e-10	1.43441
A_23_P368740	HDAC10	NM_032019	Homo sapiens histone deacetylase 10 (HDAC10), mRNA [NM_032019]	1.94369e-09	1.36172
A_23_P28953	DNMT3B	NM_175850	Homo sapiens DNA (cytosine-5-)-methyltransferase 3 beta (DNMT3B), transcript variant 6, mRNA [NM_175850]	1.0699e-08	1.35951
A_24_P303390	EHMT2	NM_025256	Homo sapiens euchromatic histone-lysine N-methyltransferase 2 (EHMT2), transcript variant NG36/G9a-SPI, mRNA [NM_025256]	6.4475e-08	1.32305
A_32_P70724	JARID1B	NM_006618	Homo sapiens Jumonji, AT rich interactive domain 1B (RBP2-like) (JARID1B), mRNA [NM_006618]	6.4475e-08	1.29692
A_23_P125001	RAC3	NM_005052	Homo sapiens ras-related C3 botulinum toxin substrate 3 (rho family, small GTP binding protein Rac3) (RAC3), mRNA [NM_005052]	9.09153e-06	1.28279
A_23_P114656	HDAC1	NM_004964	Homo sapiens histone deacetylase 1 (HDAC1), mRNA [NM_004964]	5.0928e-05	1.26339
A_23_P66608	GCN5L2	NM_021078	Homo sapiens GCN5 general control of amino-acid synthesis 5-like 2 (yeast) (GCN5L2), mRNA [NM_021078]	0.000265285	1.23615
A_24_P119201	MBD2	NM_015832	Homo sapiens methyl-CpG binding domain protein 2 (MBD2), transcript variant testis-specific, mRNA [NM_015832]	0.0014902	1.22826
A_32_P209472	MLL3	NM_170606	Homo sapiens myeloid/lymphoid or mixed-lineage leukemia 3 (MLL3), transcript variant 2, mRNA [NM_170606]	0.0047797	1.20898
A_23_P112201	JMJD2C	NM_015061	Homo sapiens jumonji domain containing 2C (JMJD2C), mRNA [NM_015061]	4.13743e-08	1.20186
A_32_P228699	PRDM10	NM_199437	Homo sapiens PR domain containing 10 (PRDM10), transcript variant 2, mRNA [NM_199437]	7.40675e-05	1.19693
A_24_P359856	HDAC4	NM_006037	Homo sapiens histone deacetylase 4 (HDAC4), mRNA [NM_006037]	1.34127e-05	1.18182
A_23_P50839	MBD3	NM_003926	Homo sapiens methyl-CpG binding domain protein 3 (MBD3), mRNA [NM_003926]	7.13499e-07	1.1652
A_23_P126393	SETDB1	NM_012432	Homo sapiens SET domain, bifurcated 1 (SETDB1), mRNA [NM_012432]	9.87611e-06	1.15648
A_23_P430044	SUV420H2	NM_032701	Homo sapiens suppressor of variegation 4-20 homolog 2 (Drosophila) (SUV420H2), mRNA [NM_032701]	9.09153e-06	1.15133
A_23_P341537	SETDB2	NM_031915	Homo sapiens SET domain, bifurcated 2 (SETDB2), mRNA [NM_031915]	0.00477271	1.15066
A_24_P105761	JMJD1A	NM_018433	Homo sapiens jumonji domain containing 1A (JMJD1A), mRNA [NM_018433]	5.45184e-07	1.1471
A_23_P142421	MLL4	NM_014727	Homo sapiens myeloid/lymphoid or mixed-lineage leukemia 4 (MLL4), mRNA [NM_014727]	0.000433571	1.13734
A_24_P298420	PRMT5	NM_006109	Homo sapiens protein arginine methyltransferase 5 (PRMT5), transcript variant 1, mRNA [NM_006109]	0.00413215	1.12895
A_23_P339480	HAT1	NM_003642	Homo sapiens histone acetyltransferase 1 (HAT1), transcript variant 1, mRNA [NM_003642]	0.000158547	1.12081
A_24_P254965	HDAC8	NM_018486	Homo sapiens histone deacetylase 8 (HDAC8), mRNA [NM_018486]	0.00433233	1.1104
A_24_P74981	AOF2	NM_015013	Homo sapiens amine oxidase (flavin containing) domain 2 (AOF2), transcript variant 2, mRNA [NM_015013]	0.0047797	1.10675
A_23_P313568	NCOA3	NM_181659	Homo sapiens nuclear receptor coactivator 3 (NCOA3), transcript variant 1, mRNA [NM_181659]	0.000247	1.09209
A_24_P217628	PRDM9	NM_020227	Homo sapiens PR domain containing 9 (PRDM9), mRNA [NM_020227]	0.00459153	1.09075
A_23_P398530	WHSC1	NM_133334	Homo sapiens Wolf-Hirschhorn syndrome candidate 1 (WHSC1), transcript variant 7, mRNA [NM_133334]	0.00172502	1.08898
A_23_P49230	PRDM7	NM_052996	Homo sapiens PR domain containing 7 (PRDM7), mRNA [NM_052996]	0.00413215	1.07867
A_23_P163850	CREBBP	NM_004380	Homo sapiens CREB binding protein (Rubinstein-Taybi syndrome) (CREBBP), mRNA [NM_004380]	0.00335127	1.05704
A_23_P100478	MYST1	NM_032188	Homo sapiens MYST histone acetyltransferase 1 (MYST1), mRNA [NM_032188]	0.000108983	-1.10181
A_23_P117146	PRDM4	NM_012406	Homo sapiens PR domain containing 4 (PRDM4), mRNA [NM_012406]	5.0928e-05	-1.1025
A_24_P317719	WHSC1L1	NM_017778	Homo sapiens Wolf-Hirschhorn syndrome candidate 1-like 1 (WHSC1L1), transcript variant short, mRNA [NM_017778]	0.0014902	-1.10354
A_23_P138849	HTATIP	NM_006388	Homo sapiens HIV-1 Tat interacting protein, 60kDa (HTATIP), transcript variant 2, mRNA [NM_006388]	4.16777e-07	-1.10732
A_24_P238855	SETD8	NM_020382	Homo sapiens SET domain containing (lysine methyltransferase) 8 (SETD8), mRNA [NM_020382]	0.00433233	-1.10846
A_23_P209879	ATF2	AK128731	Homo sapiens cDNA FLJ46899 fis, clone UTERU3022588, highly similar to Cyclic-AMP-dependent transcription factor ATF-2. [AK128731]	4.39606e-05	-1.11325
A_23_P301896	PRDM2	NM_015866	Homo sapiens PR domain containing 2, with ZNF domain (PRDM2), transcript variant 2, mRNA [NM_015866]	0.000158547	-1.12272
A_23_P83917	FBXL11	NM_012308	Homo sapiens F-box and leucine-rich repeat protein 11 (FBXL11), mRNA [NM_012308]	0.000433571	-1.12627
A_32_P159651	PCAF	NM_003884	Homo sapiens p300/CBP-associated factor (PCAF), mRNA [NM_003884]	0.00477271	-1.14246
A_23_P208090	MBD1	NM_015846	Homo sapiens methyl-CpG binding domain protein 1 (MBD1), transcript variant 1, mRNA [NM_015846]	0.000265285	-1.14366
A_24_P205137	HDAC6	BC011498	Homo sapiens histone deacetylase 6, mRNA (cDNA clone IMAGE:4179066), complete cds. [BC011498]	9.29633e-07	-1.14516
A_24_P18630	FBXL10	NM_032590	Homo sapiens F-box and leucine-rich repeat protein 10 (FBXL10), transcript variant 1, mRNA [NM_032590]	0.000650315	-1.15769
A_23_P26922	HDAC5	NM_001015053	Homo sapiens histone deacetylase 5 (HDAC5), transcript variant 3, mRNA [NM_001015053]	7.40675e-05	-1.1848
A_23_P428219	EZH1	NM_001991	Homo sapiens enhancer of zeste homolog 1 (Drosophila) (EZH1), mRNA [NM_001991]	7.42037e-10	-1.27396
A_24_P237486	MECP2	NM_004992	Homo sapiens methyl CpG binding protein 2 (Rett syndrome) (MECP2), mRNA [NM_004992]	4.13743e-08	-1.2862
A_24_P212559	MLL2	NM_003482	Homo sapiens myeloid/lymphoid or mixed-lineage leukemia 2 (MLL2), mRNA [NM_003482]	7.13499e-07	-1.29211
A_32_P225816	PRDM16	NM_022114	Homo sapiens PR domain containing 16 (PRDM16), transcript variant 1, mRNA [NM_022114]	5.26364e-05	-1.32112
A_24_P125283	HDAC5	NM_001015053	Homo sapiens histone deacetylase 5 (HDAC5), transcript variant 3, mRNA [NM_001015053]	4.16777e-07	-1.38056
A_23_P331908	PRDM11	AK097878	Homo sapiens cDNA FLJ40559 fis, clone THYMU2002910. [AK097878]	1.0699e-08	-1.43014
A_23_P255328	PRDM8	NM_020226	Homo sapiens PR domain containing 8 (PRDM8), mRNA [NM_020226]	1.94369e-09	-1.45514
