# Supplementary material for: Genome-Wide Profiling of Histone H3 Lysine 4 and Lysine 27 Trimethylation Reveals an Epigenetic Signature in Prostate Carcinogenesis
Source: PLoS One. 2009 Mar 5;4(3):e4687. doi: 10.1371/journal.pone.0004687 (PMC2650415; doi:10.1371/journal.pone.0004687)
Supplement: Table S5 — H3K27me3 marks in PC3 cells (8.96 MB XLS) [file pone.0004687.s006.xls]

## Sheet: H3K27me3 targets in PC3 cells
Name	ID	Chromosome	Start Location	Norm IP Signal	Norm WCE Signal	Normalized Log Ratio	P-value	Primary Annotation	Accession numbers	Primary Annotation Type
chr7:026965433-026965492	A_17_P05377974	chr7	26965433	1241.47	1.33612	9.85979	0.00344995	HOXA6	NM_024014	PROMOTER
chr8:127637230-127637289	A_17_P06456219	chr8	127637230	2168.65	10.417	7.70172	0.00355523	FAM84B	NM_174911	INSIDE
chr8:095292034-095292093	A_17_P06307685	chr8	95292034	69.1525	0.347059	7.63846	0.0035624	CDH17	NM_004063	PROMOTER
chr1:017894696-017894740	A_17_P00067938	chr1	17894696	174.446	1.17515	7.21379	0.00361124	ACTL8	NM_030812	INSIDE
chr8:120499977-120500036	A_17_P06424800	chr8	120499977	355.202	3.41285	6.70152	0.00369582	NOV	NM_002514	INSIDE
chr6:033283332-033283376	A_17_P04650235	chr6	33283332	145.696	1.41047	6.69064	0.00369825	hsa-mir-219-1	hsa-mir-219-1	PROMOTER
chr6:125511648-125511707	A_17_P05047149	chr6	125511648	126.086	1.39191	6.50119	0.00373909	TPD52L1	NM_001003396	PROMOTER
chr8:009799905-009799950	A_17_P05949140	chr8	9799905	340.344	5.37691	5.98407	0.00388534	hsa-mir-124a-1	hsa-mir-124a-1	PROMOTER
chr7:026987145-026987201	A_17_P05378149	chr7	26987145	1136.91	18.4667	5.94405	0.00389925	HOXA10	NM_018951	INSIDE
chr2:074481053-074481112	A_17_P01280831	chr2	74481053	44.3446	0.721621	5.94137	0.00390211	SLC4A5	NM_033323	INSIDE
chr4:156018230-156018289	A_17_P03544528	chr4	156018230	97.8738	1.60922	5.92649	0.00390597	LRAT	NM_004744	PROMOTER
chr7:072483189-072483233	A_17_P15970320	chr7	72483189	348.059	5.97312	5.8647	0.0039283	MLXIPL	NM_032951	INSIDE
chr2:000936059-000936107	A_17_P00937810	chr2	936059	74.8746	1.28214	5.86785	0.0039288	SNTG2	NM_018968	PROMOTER
chr4:013224518-013224573	A_17_P15547119	chr4	13224518	910.582	15.6757	5.86019	0.00392999	BAPX1	NM_001189	PROMOTER
chr7:136485575-136485621	A_17_P05814631	chr7	136485575	70.6925	1.27312	5.79512	0.00395609	PTN	NM_002825	INSIDE
chr9:068588147-068588206	A_17_P06714595	chr9	68588147	218.066	4.14553	5.71707	0.0039875	PIP5K1B	NM_001031687	INSIDE
chr1:044535535-044535594	A_17_P00171565	chr1	44535535	354.464	6.92947	5.67675	0.00400484	C1orf164	NM_018150	PROMOTER
chr4:054809680-054809734	A_17_P03104057	chr4	54809680	573.245	12.0254	5.57499	0.00405133	GSH2	NM_133267	DOWNSTREAM
chr6:126114295-126114354	A_17_P05050138	chr6	126114295	478.464	10.2996	5.53775	0.00406934	HEY2	NM_012259	INSIDE
chr6:142665148-142665207	A_17_P05129425	chr6	142665148	678.526	15.037	5.49581	0.00409026	GPR126	NM_001032394	INSIDE
chr2:182578384-182578443	A_17_P01725491	chr2	182578384	42.6251	0.938415	5.50533	0.00409152	SSFA2	NM_006751	PROMOTER
chr9:136319977-136320024	A_17_P07007702	chr9	136319977	894.269	19.9549	5.4859	0.00409532	LHX3	NM_014564	INSIDE
chr7:154298066-154298125	A_17_P05885737	chr7	154298066	159.774	3.57068	5.48369	0.00409661	HTR5A	NM_024012	PROMOTER
chr1:027647327-027647371	A_17_P00105898	chr1	27647327	158.827	3.56992	5.47542	0.00410083	BC064382	NONE	Unknown
chr5:175237191-175237246	A_17_P04482837	chr5	175237191	39.1191	0.926656	5.3997	0.00414341	CPLX2	NM_001008220	INSIDE
chr3:138963724-138963775	A_17_P02613066	chr3	138963724	752.623	18.025	5.38386	0.00414981	SOX14	NM_004189	PROMOTER
chr6:055295564-055295623	A_17_P04752956	chr6	55295564	148.4	3.56131	5.38094	0.00415166	UNQ9356	NM_207410	PROMOTER
chr7:048014814-048014864	A_17_P05472993	chr7	48014814	389.351	9.61601	5.33949	0.004175	ABCA13	NM_152701	PROMOTER
chr3:130727129-130727185	A_17_P02578504	chr3	130727129	60.1437	1.48395	5.3409	0.00417551	RHO	NM_000539	PROMOTER
chr1:087509640-087509686	A_17_P00355708	chr1	87509640	551.421	13.8343	5.31684	0.00418819	LMO4	NM_006769	INSIDE
chr2:070691204-070691263	A_17_P01264992	chr2	70691204	378.873	9.54411	5.31096	0.00419169	TGFA	NM_003236	INSIDE
chr5:002809868-002809918	A_17_P03721142	chr5	2809868	661.999	17.1299	5.27224	0.00421495	CEI	NM_178569	DOWNSTREAM
chr1:085227237-085227296	A_17_P00345381	chr1	85227237	327.137	8.48269	5.26923	0.00421681	MCOLN3	NM_018298	PROMOTER
chr2:172773722-172773781	A_17_P01675428	chr2	172773722	157.97	4.10204	5.26716	0.00421831	DLX1	NM_001038493	PROMOTER
chr7:117105100-117105159	A_17_P05724876	chr7	117105100	293.091	7.66655	5.25663	0.00422464	CTTNBP2	NM_033427	INSIDE
chr1:202268349-202268408	A_17_P00747931	chr1	202268349	717.05	18.869	5.24798	0.00422993	MFSD4	NM_181644	PROMOTER
chr5:011958076-011958135	A_17_P03770033	chr5	11958076	445.622	11.7948	5.2396	0.0042352	CTNND2	NM_001332	PROMOTER
chr6:100157413-100157472	A_17_P04931684	chr6	100157413	475.531	13.0454	5.18792	0.00426838	PRDM13	NM_021620	PROMOTER
chr2:200159966-200160016	A_17_P01806047	chr2	200159966	503.77	13.8382	5.18604	0.00426962	SATB2-FLJ32063	NM_015265-NM_153031	DIVERGENT_PROMOTER
chr5:145699222-145699277	A_17_P04349887	chr5	145699222	383.803	10.7607	5.15652	0.00428926	POU4F3	NM_002700	INSIDE
chr1:047202008-047202067	A_17_P00180638	chr1	47202008	125.307	3.51937	5.154	0.00429122	CYP4X1	NM_178033	INSIDE
chr4:093581696-093581755	A_17_P03265648	chr4	93581696	23.0266	0.651421	5.14357	0.00430507	GRID2	NM_001510	PROMOTER
chr2:227853087-227853146	A_17_P01940475	chr2	227853087	265.925	7.5811	5.13247	0.00430567	COL4A4	NM_000092	INSIDE
chr6:134250515-134250574	A_17_P05091074	chr6	134250515	499.622	14.2908	5.12768	0.00430893	TCF21	NM_003206	PROMOTER
chr7:026911894-026911953	A_17_P05377540	chr7	26911894	221.843	6.35586	5.12531	0.00431064	HOXA1	NM_153620	PROMOTER
chr8:100026650-100026701	A_17_P06328544	chr8	100026650	282.659	8.25199	5.09818	0.00432962	OSR2	NM_053001	INSIDE
chr1:025002964-025003011	A_17_P00096245	chr1	25002964	310.373	9.07295	5.09629	0.00433093	RUNX3	NM_004350	PROMOTER
chr9:130570430-130570489	A_17_P06981680	chr9	130570430	378.649	11.1238	5.08915	0.00433601	PRDM12	NM_021619	INSIDE
chr6:046090408-046090460	A_17_P04709706	chr6	46090408	422.024	12.4483	5.0833	0.00434019	CLIC5	NM_016929	INSIDE
chr2:095113685-095113735	A_17_P01340388	chr2	95113685	273.872	8.21551	5.05901	0.00435786	MAL	NM_002371	INSIDE
chr6:127479730-127479789	A_17_P05056694	chr6	127479730	77.4264	2.32479	5.05766	0.00435935	RSPO3	NM_032784	PROMOTER
chr1:042473766-042473815	A_17_P00163314	chr1	42473766	65.6128	1.98894	5.0439	0.00437114	FOXJ3	NM_014947	PROMOTER
chr9:101581619-101581678	A_17_P06856737	chr9	101581619	354.319	10.897	5.02305	0.00438457	GRIN3A	NM_133445	PROMOTER
chr1:026055974-026056018	A_17_P00099904	chr1	26055974	813.42	25.0596	5.02056	0.00438641	SLC30A2	NM_001004434	INSIDE
chr5:001937546-001937605	A_17_P03715896	chr5	1937546	412.942	12.7972	5.01204	0.00439291	IRX4	NM_016358	PROMOTER
chr4:000810527-000810571	A_17_P02887320	chr4	810527	232.786	7.22016	5.01083	0.00439388	CPLX1	NM_006651	PROMOTER
chr9:000968045-000968104	A_17_P06542257	chr9	968045	664.988	20.6801	5.00701	0.00439674	DMRT3	NM_021240	INSIDE
chr6:078230176-078230222	A_17_P04834772	chr6	78230176	340.859	10.7728	4.98371	0.0044148	HTR1B	NM_000863	PROMOTER
chr9:036390756-036390800	A_17_P16175141	chr9	36390756	128.311	4.05264	4.98464	0.0044165	RNF38	NM_194329	PROMOTER
chr1:044540054-044540101	A_17_P00171586	chr1	44540054	153.355	4.89387	4.96976	0.00442601	C1orf164	NM_018150	INSIDE
chr5:100264081-100264129	A_17_P04142822	chr5	100264081	289.78	9.28119	4.9645	0.00442995	ST8SIA4	NM_175052	INSIDE
chr4:004978106-004978150	A_17_P02902309	chr4	4978106	859.979	27.6925	4.95673	0.00443612	MSX1	NM_002448	PROMOTER
chr4:074850848-074850907	A_17_P03182958	chr4	74850848	511.118	16.4854	4.95439	0.00443802	RASSF6	NM_177532	INSIDE
chr5:121673514-121673573	A_17_P04240402	chr5	121673514	19.2266	0.624134	4.94511	0.0044607	SNCAIP	NM_005460	PROMOTER
chr7:026972646-026972705	A_17_P05378032	chr7	26972646	333.628	11.0902	4.91089	0.0044736	HOXA7	NM_006896	PROMOTER
chr3:140150093-140150146	A_17_P02617868	chr3	140150093	716.317	23.8288	4.90982	0.00447446	FOXL2	NM_023067	PROMOTER
chr1:148596019-148596075	A_17_P00509462	chr1	148596019	8.39785	0.238156	5.14004	0.00447892	RORC	NM_001001523	INSIDE
chr8:107738384-107738443	A_17_P06363993	chr8	107738384	192.795	6.58082	4.87266	0.00450614	OXR1	NM_181354	PROMOTER
chr5:134897694-134897753	A_17_P04300592	chr5	134897694	428.64	14.872	4.84909	0.00452652	NEUROG1	NM_006161	DOWNSTREAM
chr1:148323719-148323768	A_17_P00508289	chr1	148323719	47.7398	1.67575	4.83232	0.00454362	CGN	NM_020770	INSIDE
chr1:167364683-167364742	A_17_P00591379	chr1	167364683	450.764	16.1725	4.80076	0.00456999	PRRX1	NM_006902	PROMOTER
chr4:004978677-004978736	A_17_P02902314	chr4	4978677	262.961	9.43865	4.80013	0.00457064	MSX1	NM_002448	PROMOTER
chr6:138469628-138469687	A_17_P05111476	chr6	138469628	286.683	10.2971	4.79914	0.00457151	PERP	NM_022121	INSIDE
chr5:036643372-036643431	A_17_P03873861	chr5	36643372	285.259	10.2854	4.79361	0.0045766	SLC1A3	NM_004172	INSIDE
chr8:120033366-120033425	A_17_P06422822	chr8	120033366	198.183	7.15246	4.79225	0.00457803	TNFRSF11B	NM_002546	INSIDE
chr5:134898541-134898590	A_17_P04300599	chr5	134898541	682.594	24.6428	4.79179	0.00457825	NEUROG1	NM_006161	INSIDE
LACC:SRN_50391	LACC:SRN_50391	NONE	NONE	4345.95	157.602	4.78531	0.00458426	LACC:SRN_50391	NONE	NONE
chr5:180010035-180010094	A_17_P04498633	chr5	180010035	352.375	12.9152	4.76997	0.00459869	FLT4	NM_002020	PROMOTER
chr2:033864727-033864772	A_17_P01092989	chr2	33864727	456.824	16.7657	4.76805	0.00460051	MYADML	NM_207329	INSIDE
chr2:162098961-162099005	A_17_P01623177	chr2	162098961	433.242	15.9178	4.76646	0.00460201	TBR1	NM_006593	INSIDE
chr9:068547685-068547744	A_17_P06714385	chr9	68547685	236.084	8.6749	4.76631	0.00460217	PIP5K1B	NM_003558	PROMOTER
chr5:000904207-000904251	A_17_P03711024	chr5	904207	273.813	10.1895	4.74804	0.00461968	ZDHHC11	NM_024786	PROMOTER
chr4:023570260-023570319	A_17_P02982801	chr4	23570260	92.5663	3.44078	4.74968	0.0046204	PPARGC1A	NM_013261	PROMOTER
chr5:162858913-162858972	A_17_P15758707	chr5	162858913	29.1631	1.08013	4.75486	0.00462561	MAT2B	NM_182796	PROMOTER
chr7:049588132-049588191	A_17_P05479488	chr7	49588132	308.322	11.6056	4.73155	0.00463563	UNQ739	NM_198570	PROMOTER
chr6:134251000-134251059	A_17_P05091080	chr6	134251000	482.204	18.1915	4.72831	0.00463877	TCF21	NM_003206	PROMOTER
chr3:018459975-018460027	A_17_P02091195	chr3	18459975	247.482	9.34211	4.72743	0.00463977	BC001744	NONE	Unknown
chr7:026908961-026909005	A_17_P05377517	chr7	26908961	713.801	27.0506	4.72179	0.00464519	HOXA1	NM_153620	PROMOTER
chr6:100159719-100159773	A_17_P04931703	chr6	100159719	426.507	16.3127	4.7085	0.00465838	PRDM13	NM_021620	PROMOTER
chr3:087123433-087123492	A_17_P02405203	chr3	87123433	617.553	23.6749	4.70513	0.00466174	VGLL3	NM_016206	PROMOTER
chr4:147914653-147914712	A_17_P03505506	chr4	147914653	286.437	11.0111	4.70118	0.00466577	POU4F2	NM_004575	PROMOTER
chr8:072919721-072919780	A_17_P06207703	chr8	72919721	420.45	16.2195	4.69613	0.00467081	MSC	NM_005098	PROMOTER
chr2:056058378-056058437	A_17_P01196665	chr2	56058378	270.988	10.5134	4.68793	0.00467917	EFEMP1	NM_018894	INSIDE
chr4:030397289-030397333	A_17_P03014054	chr4	30397289	391.943	15.2988	4.67916	0.00468809	PCDH7	NM_002589	PROMOTER
chr5:172598948-172599003	A_17_P04471798	chr5	172598948	699.364	27.4921	4.66896	0.00469858	NKX2-5	NM_004387	PROMOTER
chr5:052812692-052812751	A_17_P15690758	chr5	52812692	542.411	21.3307	4.66838	0.00469918	FST	NM_006350	INSIDE
chr2:159142287-159142346	A_17_P01608485	chr2	159142287	34.066	1.33564	4.67273	0.0046992	PKP4	NM_001005476	INSIDE
chr1:018702871-018702930	A_17_P00071680	chr1	18702871	382.985	15.1572	4.65921	0.00470873	PAX7	NM_002584	INSIDE
chr6:170519776-170519834	A_17_P05257605	chr6	170519776	328.109	13.0246	4.65486	0.00471329	DLL1	NM_005618	PROMOTER
chr3:188944581-188944640	A_17_P02839882	chr3	188944581	380.335	15.115	4.65322	0.00471501	BCL6	NM_138931	PROMOTER
chr2:128170152-128170197	A_17_P01470111	chr2	128170152	149.643	5.95585	4.65107	0.00471737	SFT2D3	NM_032740	PROMOTER
chr6:166550086-166550144	A_17_P05240297	chr6	166550086	230.534	9.25459	4.63867	0.00473044	T	NM_003181	INSIDE
chr6:170520949-170521008	A_17_P05257610	chr6	170520949	390.002	15.7461	4.63042	0.00473921	DLL1	NM_005618	PROMOTER
chr9:136321231-136321275	A_17_P16276456	chr9	136321231	615.614	24.8792	4.62901	0.00474068	LHX3	NM_014564	PROMOTER
chr10:043080330-043080382	A_17_P07190402	chr10	43080330	278.755	11.2975	4.62492	0.00474514	RASGEF1A	NM_145313	INSIDE
chr2:102261642-102261698	A_17_P01366413	chr2	102261642	303.708	12.3186	4.62378	0.00474634	IL1RL2	NM_003854	PROMOTER
chr4:085862602-085862661	A_17_P03231726	chr4	85862602	245.451	9.97346	4.6212	0.00474919	CDS1	NM_001263	INSIDE
chr6:001333397-001333441	A_17_P04506762	chr6	1333397	937.525	38.3147	4.61289	0.00475812	FOXF2	NM_001452	PROMOTER
chr8:055533447-055533491	A_17_P16095874	chr8	55533447	378.473	15.5573	4.60453	0.00476731	SOX17	NM_022454	INSIDE
chr5:034691473-034691517	A_17_P03865000	chr5	34691473	338.268	14.0155	4.59307	0.00477999	RAI14	NM_015577	PROMOTER
chr2:073431630-073431680	A_17_P15256121	chr2	73431630	972.842	40.3123	4.59291	0.00478009	EGR4	NM_001965	INSIDE
chr9:137777374-137777418	A_17_P07013498	chr9	137777374	37.9385	1.58151	4.58429	0.00479237	ARRDC1	NM_152285	INSIDE
chr2:222991537-222991583	A_17_P01917044	chr2	222991537	649.89	27.3488	4.57065	0.00480507	PAX3	NM_013942	PROMOTER
chr1:085223741-085223800	A_17_P00345354	chr1	85223741	526.409	22.209	4.56697	0.00480925	MCOLN3	NM_018298	INSIDE
chr1:024999203-024999262	A_17_P00096222	chr1	24999203	225.746	9.53504	4.56532	0.0048112	RUNX3	NM_004350	INSIDE
chr1:149300826-149300875	A_17_P00512248	chr1	149300826	299.534	12.6547	4.56498	0.00481156	C1orf42	NM_019060	INSIDE
chr7:026946123-026946182	A_17_P05377815	chr7	26946123	437.753	18.5322	4.56201	0.0048149	HOXA4	NM_002141	PROMOTER
chr7:156300838-156300888	A_17_P05895708	chr7	156300838	1045.1	44.3606	4.55821	0.00481923	HLXB9	NM_005515	INSIDE
chr3:140149595-140149654	A_17_P02617863	chr3	140149595	556.154	23.8891	4.54106	0.00483906	FOXL2	NM_023067	PROMOTER
chr2:172774347-172774406	A_17_P01675431	chr2	172774347	192.26	8.26356	4.54015	0.00484022	DLX1	NM_001038493	PROMOTER
chr1:176931742-176931786	A_17_P15148250	chr1	176931742	349.271	15.08	4.53364	0.00484776	LHX4	NM_033343	INSIDE
chr7:026985229-026985281	A_17_P05378140	chr7	26985229	776.278	33.535	4.53283	0.00484868	HOXA10	NM_018951	INSIDE
chr10:026546889-026546938	A_17_P07139588	chr10	26546889	573.18	24.7867	4.53135	0.00485042	GAD2	NM_000818	INSIDE
chr4:070906910-070906957	A_17_P03166657	chr4	70906910	137.41	5.94208	4.53137	0.00485252	SULT1E1	NM_005420	PROMOTER
chr1:063495875-063495934	A_17_P00247013	chr1	63495875	301.601	13.081	4.52709	0.00485548	FOXD3	NM_012183	PROMOTER
chr4:041593462-041593521	A_17_P03062905	chr4	41593462	265.591	11.5215	4.52681	0.00485585	PHOX2B	NM_003924	PROMOTER
chr4:075084401-075084453	A_17_P03183912	chr4	75084401	419.434	18.2091	4.52571	0.00485708	PF4V1	NM_002620	INSIDE
chr5:001938941-001938985	A_17_P03715907	chr5	1938941	262.803	11.4915	4.51534	0.00486949	IRX4	NM_016358	PROMOTER
chr8:057283990-057284049	A_17_P06136499	chr8	57283990	251.201	11.0231	4.51024	0.00487558	PLAG1	NM_002655	INSIDE
chr3:189607196-189607255	A_17_P02843429	chr3	189607196	294.775	12.9828	4.50494	0.00488188	LPP	NM_005578	INSIDE
chr4:024711374-024711433	A_17_P02988803	chr4	24711374	354.736	15.6342	4.50397	0.00488302	LGI2	NM_018176	PROMOTER
chr6:078231039-078231083	A_17_P15832884	chr6	78231039	353.657	15.6154	4.50131	0.00488627	HTR1B	NM_000863	PROMOTER
chr6:031478201-031478249	A_17_P04643290	chr6	31478201	824.258	36.5056	4.49691	0.00489155	MICA	NM_000247	PROMOTER
chr5:032747440-032747491	A_17_P03858129	chr5	32747440	206.876	9.1625	4.49688	0.00489177	NPR3	NM_000908	INSIDE
chr4:111917484-111917543	A_17_P15601777	chr4	111917484	257.16	11.4326	4.49145	0.00489832	PITX2	NM_153427	PROMOTER
chr6:146392464-146392508	A_17_P05147087	chr6	146392464	578.518	26.1081	4.46979	0.00492489	GRM1	NM_000838	INSIDE
chr10:011101467-011101526	A_17_P16291304	chr10	11101467	87.0916	3.94986	4.46266	0.00493517	CUGBP2	NM_006561	INSIDE
chr6:011345553-011345612	A_17_P15785328	chr6	11345553	23.0508	1.04118	4.46853	0.00493746	NEDD9	NM_006403	PROMOTER
chr10:007749918-007749968	A_17_P07054555	chr10	7749918	293.698	13.3709	4.45717	0.00494075	ITIH5	NM_001001851	PROMOTER
chr5:003647027-003647079	A_17_P03725992	chr5	3647027	2345.75	107.01	4.45423	0.00494442	IRX1	NM_024337	PROMOTER
chr4:095107147-095107200	A_17_P03273693	chr4	95107147	267.077	12.2661	4.4445	0.00495685	ATOH1	NM_005172	PROMOTER
chr6:046247007-046247066	A_17_P04710418	chr6	46247007	288.627	13.3009	4.43961	0.00496306	ENPP5	NM_021572	PROMOTER
chr4:078885182-078885241	A_17_P03200069	chr4	78885182	204.744	9.44473	4.43817	0.00496498	CXCL13	NM_006419	INSIDE
chr6:169470219-169470278	A_17_P05253287	chr6	169470219	433.388	20.0253	4.43576	0.00496799	THBS2	NM_003247	INSIDE
chr7:026998400-026998444	A_17_P05378231	chr7	26998400	3031.89	140.257	4.43407	0.00497012	HOXA11	NM_005523	PROMOTER
chr6:001260071-001260130	A_17_P04506452	chr6	1260071	72.7318	3.36854	4.43239	0.00497324	FOXQ1	NM_033260	DOWNSTREAM
chr1:038179114-038179173	A_17_P00145814	chr1	38179114	403.547	18.942	4.41308	0.00499748	POU3F1	NM_002699	DOWNSTREAM
chr12:051255856-051255901	A_17_P08355086	chr12	51255856	518.245	0.548004	9.88523	0.00499831	K6IRS4	NM_175053	PROMOTER
chr5:113724043-113724102	A_17_P04204548	chr5	113724043	350.196	16.4758	4.40975	0.00500188	KCNN2	NM_021614	PROMOTER
chr8:144313657-144313702	A_17_P06531486	chr8	144313657	627.997	29.569	4.4086	0.00500336	LY6H	NM_002347	PROMOTER
chr4:066362883-066362937	A_17_P03153294	chr4	66362883	560.396	26.392	4.40827	0.00500379	EPHA5	NM_004439	INSIDE
chr13:113914229-113914273	A_17_P09151441	chr13	113914229	172.973	0.21246	9.66914	0.00500539	RASA3	NM_007368	INSIDE
chr4:187850346-187850398	A_17_P03693115	chr4	187850346	167.644	7.91857	4.40402	0.0050096	MTNR1A	NM_005958	INSIDE
chr5:145701161-145701220	A_17_P04349900	chr5	145701161	362.296	17.1821	4.39819	0.00501718	POU4F3	NM_002700	DOWNSTREAM
chr2:120821666-120821711	A_17_P01438531	chr2	120821666	509.797	24.2332	4.39487	0.00502163	INHBB	NM_002193	INSIDE
chr8:114516301-114516352	A_17_P06396007	chr8	114516301	960.436	45.6579	4.39475	0.00502175	CSMD3	NM_052900	INSIDE
chr9:076304367-076304425	A_17_P06749977	chr9	76304367	273.749	13.0996	4.38526	0.00503454	GCNT1	NM_001490	INSIDE
chr8:069027554-069027601	A_17_P06189246	chr8	69027554	273.091	13.0909	4.38274	0.00503811	DEPDC2	NM_025170	INSIDE
chr8:086475470-086475529	A_17_P06268530	chr8	86475470	151.347	7.30772	4.3723	0.00505241	CA1	NM_001738	INSIDE
chr6:137857034-137857093	A_17_P15865916	chr6	137857034	207.987	10.0511	4.37106	0.00505388	OLIG3	NM_175747	INSIDE
chr7:027056220-027056265	A_17_P05378641	chr7	27056220	305.41	14.7736	4.36966	0.00505577	EVX1	NM_001989	INSIDE
chr1:044543572-044543616	A_17_P00171606	chr1	44543572	621.396	30.1	4.36768	0.00505843	C1orf164	NM_018150	INSIDE
chr1:085224436-085224495	A_17_P00345361	chr1	85224436	267.885	13.0168	4.36317	0.0050647	MCOLN3	NM_018298	INSIDE
chr18:050407890-050407949	A_17_P10720880	chr18	50407890	64.9687	0.184704	8.45838	0.00507233	C18orf26	NM_173629	PROMOTER
chr6:010519494-010519538	A_17_P04550232	chr6	10519494	751.481	36.7009	4.35585	0.00507476	TFAP2A	NM_001032280	INSIDE
chr20:062155921-062155965	A_17_P17212636	chr20	62155921	149.598	0.464578	8.33095	0.00507617	SOX18-TCEA2	NM_018419-NM_198723	DIVERGENT_PROMOTER
chr1:003006680-003006724	A_17_P00007556	chr1	3006680	1033.66	50.6125	4.35212	0.00507993	PRDM16	NM_022114	PROMOTER
chr2:171496109-171496168	A_17_P01670267	chr2	171496109	167.333	8.19773	4.35135	0.00508121	GAD1	NM_000817	PROMOTER
chr11:006855188-006855237	A_17_P07620916	chr11	6855188	241.451	0.801404	8.23498	0.00508244	OR10A4	NM_207186	INSIDE
chr5:000579279-000579323	A_17_P03710175	chr5	579279	12058.9	594.437	4.34244	0.00509349	SLC9A3	NM_004174	PROMOTER
chr8:054327072-054327131	A_17_P16095195	chr8	54327072	273.08	13.4713	4.34136	0.00509507	OPRK1	NM_000912	PROMOTER
chr6:127482117-127482161	A_17_P05056707	chr6	127482117	282.522	14.0025	4.33461	0.00510463	RSPO3	NM_032784	INSIDE
chr8:022187849-022187908	A_17_P06005244	chr8	22187849	36.2819	1.79842	4.33445	0.00510839	PIWIL2	NM_018068	PROMOTER
chr3:188941711-188941764	A_17_P02839852	chr3	188941711	270.457	13.4356	4.33127	0.00510935	BCL6	NM_138931	PROMOTER
chr9:074936589-074936648	A_17_P06744042	chr9	74936589	490.617	24.4422	4.32715	0.00511516	OSTF1	NM_012383	INSIDE
chr7:026982705-026982749	A_17_P15920207	chr7	26982705	680.231	33.9385	4.32503	0.00511818	hsa-mir-196b	hsa-mir-196b	PROMOTER
chr20:032753950-032753995	A_17_P11142195	chr20	32753950	42.4091	0.170954	7.95463	0.00512088	TP53INP2	NM_021202	PROMOTER
chr5:001274175-001274222	A_17_P03712850	chr5	1274175	206.616	10.3453	4.31991	0.00512563	SLC6A19	NM_001003841	INSIDE
chr4:111914728-111914787	A_17_P03347279	chr4	111914728	20.5366	1.02257	4.32793	0.00512929	PITX2	NM_153426	INSIDE
chr6:166552817-166552875	A_17_P05240309	chr6	166552817	144.887	7.29536	4.3118	0.00513752	T	NM_003181	PROMOTER
chr4:005172052-005172096	A_17_P02902968	chr4	5172052	326.587	16.4964	4.30724	0.00514388	STK32B	NM_018401	INSIDE
chr6:053991584-053991643	A_17_P04746975	chr6	53991584	227.02	11.4682	4.30711	0.00514425	C6orf142	NM_138569	PROMOTER
chr11:067534601-067534645	A_17_P07851913	chr11	67534601	515.202	2.72223	7.5642	0.00515639	ALDH3B1	NM_000694	INSIDE
chr21:045790745-045790789	A_17_P11417434	chr21	45790745	77.5501	0.419084	7.53175	0.00516328	SLC19A1	NM_194255	PROMOTER
chr1:085223952-085224011	A_17_P00345356	chr1	85223952	271.136	13.827	4.29346	0.00516413	MCOLN3	NM_018298	INSIDE
chr1:047611338-047611386	A_17_P00181984	chr1	47611338	1909.42	97.9542	4.28488	0.00517674	FOXD2	NM_004474	PROMOTER
chr4:147913088-147913134	A_17_P03505490	chr4	147913088	291.248	14.9563	4.28342	0.00517898	POU4F2	NM_004575	PROMOTER
chr9:075734921-075734965	A_17_P06747058	chr9	75734921	248.258	12.7609	4.28203	0.00518105	PCSK5	NM_006200	PROMOTER
chr6:046867209-046867268	A_17_P04713618	chr6	46867209	344.802	17.7957	4.27616	0.00518982	MEP1A	NM_005588	PROMOTER
chr5:000576820-000576871	A_17_P03710167	chr5	576820	152.457	7.87109	4.27569	0.00519064	SLC9A3	NM_004174	INSIDE
chr6:007673131-007673175	A_17_P04536905	chr6	7673131	329.078	17.0089	4.27407	0.00519293	BMP6	NM_001718	INSIDE
chr5:172596722-172596774	A_17_P04471779	chr5	172596722	906.431	47.1078	4.26616	0.00520484	NKX2-5	NM_004387	PROMOTER
chr4:111193550-111193609	A_17_P03343978	chr4	111193550	672.54	35.18	4.25679	0.0052191	EGF	NM_001963	INSIDE
chr2:222991114-222991173	A_17_P01917040	chr2	222991114	2124.25	111.433	4.2527	0.00522536	PAX3	NM_013942	PROMOTER
chr6:126111448-126111507	A_17_P05050116	chr6	126111448	667.537	35.0767	4.25026	0.00522919	HEY2	NM_012259	PROMOTER
chrX:047198834-047198892	A_17_P11739017	chrX	47198834	140.899	1.02201	7.10711	0.00523283	TIMP1	NM_003254	INSIDE
chr3:187837036-187837095	A_17_P02835331	chr3	187837036	189.307	9.96793	4.24729	0.0052341	FETUB	NM_014375	PROMOTER
chr10:045192050-045192109	A_17_P16321437	chr10	45192050	332.203	17.5314	4.24405	0.00523875	ALOX5	NM_000698	INSIDE
chr7:115908816-115908867	A_17_P05718546	chr7	115908816	538.159	28.4228	4.24291	0.00524047	MET	NM_000245	INSIDE
chr2:219736159-219736218	A_17_P01899784	chr2	219736159	279.127	14.746	4.24253	0.00524114	DKFZp434O0527	NM_152389	PROMOTER
LACC:GD32C_7_	LACC:GD32C_7_	NONE	NONE	62.9875	3.33399	4.23974	0.00524683	LACC:GD32C_7_	NONE	NONE
chr17:036347334-036347393	A_17_P10321374	chr17	36347334	999.65	7.66268	7.02743	0.00524769	KRT23	NM_173213	PROMOTER
chr8:055532485-055532544	A_17_P06128626	chr8	55532485	214.111	11.3457	4.23814	0.00524804	SOX17	NM_022454	PROMOTER
chr7:027013684-027013743	A_17_P05378355	chr7	27013684	3455.51	183.177	4.23759	0.00524872	HOXA13	NM_000522	PROMOTER
chr9:068860770-068860829	A_17_P06716079	chr9	68860770	277.249	14.716	4.23572	0.00525174	PRKACG	NM_002732	PROMOTER
chr4:085778171-085778216	A_17_P03231427	chr4	85778171	314.428	16.7065	4.23424	0.00525402	NKX6-1	NM_006168	PROMOTER
chr12:009775553-009775612	A_17_P08185861	chr12	9775553	88.312	0.687902	7.00426	0.00525532	DCAL1	NM_172004	INSIDE
chr2:172775751-172775810	A_17_P01675437	chr2	172775751	153.057	8.15219	4.23074	0.00525974	DLX1	NM_001038493	INSIDE
chr3:191525417-191525471	A_17_P15522004	chr3	191525417	400.59	21.4858	4.22067	0.00527534	CLDN1	NM_021101	PROMOTER
chr1:047610814-047610859	A_17_P00181978	chr1	47610814	416.731	22.373	4.21929	0.00527753	FOXD2	NM_004474	PROMOTER
chr1:009991183-009991242	A_17_P00039285	chr1	9991183	72.0852	3.88429	4.21398	0.00528705	RBP7	NM_052960	PROMOTER
chr11:012355365-012355409	A_17_P07645044	chr11	12355365	115.956	1.00901	6.8445	0.00528879	PARVA	NM_018222	PROMOTER
chr3:147450817-147450876	A_17_P02650999	chr3	147450817	156.328	8.44376	4.21055	0.00529178	PLSCR4	NM_020353	INSIDE
chr4:001100869-001100928	A_17_P02888554	chr4	1100869	231.45	12.547	4.20529	0.00529997	LOC285498	NM_194439	PROMOTER
chr10:045188740-045188788	A_17_P07198562	chr10	45188740	633.551	34.3619	4.20458	0.00530103	ALOX5	NM_000698	PROMOTER
chr1:203070475-203070520	A_17_P00751110	chr1	203070475	631.357	34.315	4.20155	0.0053059	RASSF5	NM_182663	INSIDE
chr14:103649912-103649956	A_17_P09529802	chr14	103649912	102.041	0.960399	6.7313	0.00531783	hsa-mir-203	hsa-mir-203	PROMOTER
chr19:009982430-009982477	A_17_P10880029	chr19	9982430	577.373	5.53369	6.70512	0.00532255	COL5A3-RDH8	NM_015719-NM_015725	DIVERGENT_PROMOTER
chr10:026541387-026541446	A_17_P16302616	chr10	26541387	212.581	11.6567	4.18878	0.00532672	MYO3A	NM_017433	INSIDE
chr1:110863589-110863636	A_17_P15099369	chr1	110863589	452.03	24.7965	4.18821	0.00532759	KCNA2	NM_004974	PROMOTER
chr7:116710079-116710138	A_17_P05722580	chr7	116710079	169.781	9.32822	4.18593	0.00533153	CFTR	NM_000492	PROMOTER
chrX:117889034-117889093	A_17_P11912928	chrX	117889034	446.688	4.51322	6.62897	0.00534299	LONRF3	NM_001031855	PROMOTER
chr10:028326993-028327052	A_17_P07146147	chr10	28326993	282.918	15.6406	4.17702	0.00534606	ARMC4	NM_018076	INSIDE
chr3:087355845-087355904	A_17_P02406372	chr3	87355845	173.926	9.62479	4.17557	0.00534858	CHMP2B	NM_014043	PROMOTER
chr8:032527222-032527281	A_17_P06052333	chr8	32527222	47.6956	2.64176	4.17429	0.00535263	NRG1	NM_004495	INSIDE
chr2:222263067-222263111	A_17_P01913168	chr2	222263067	217.065	12.0344	4.17289	0.00535297	EPHA4	NM_004438	PROMOTER
chr6:031188637-031188690	A_17_P04642459	chr6	31188637	426.807	23.6875	4.17139	0.00535537	C6orf15-PSORS1C1	NM_014070-NM_014068	DIVERGENT_PROMOTER
chr4:000981569-000981613	A_17_P02888002	chr4	981569	224.29	12.4571	4.17032	0.00535718	SLC26A1	NM_213613	PROMOTER
chr9:130566352-130566409	A_17_P06981658	chr9	130566352	529.363	29.4864	4.16614	0.0053641	PRDM12	NM_021619	PROMOTER
chr6:126113219-126113271	A_17_P05050127	chr6	126113219	526.153	29.4154	4.16084	0.00537297	HEY2	NM_012259	INSIDE
chr2:237262551-237262610	A_17_P01983144	chr2	237262551	194.006	10.876	4.15689	0.00537982	CMKOR1	NM_020311	INSIDE
chr1:244345004-244345063	A_17_P00930639	chr1	244345004	213.37	11.9909	4.15334	0.00538575	TRIM58	NM_015431	PROMOTER
chr6:134247625-134247684	A_17_P05091048	chr6	134247625	176.255	9.91887	4.15135	0.00538926	TCF21	NM_003206	PROMOTER
chr14:094311587-094311646	A_17_P09486527	chr14	94311587	263.203	2.97774	6.46581	0.00539112	GSC	NM_173849	PROMOTER
chr9:032372995-032373050	A_17_P06687208	chr9	32372995	324.957	18.3209	4.14869	0.0053936	ACO1	NM_002197	PROMOTER
chr8:006783320-006783379	A_17_P05941129	chr8	6783320	383.391	21.6332	4.1475	0.0053956	DEFA4	NM_001925	PROMOTER
chr12:094892179-094892223	A_17_P16583215	chr12	94892179	237.946	2.73171	6.44468	0.00539769	HAL	NM_002108	INSIDE
chr9:108696884-108696928	A_17_P16252396	chr9	108696884	57.8325	3.26806	4.14538	0.00540148	ACTL7B	NM_006686	INSIDE
chr1:115948056-115948113	A_17_P00475464	chr1	115948056	26.6407	1.50146	4.14919	0.00540339	VANGL1	NM_138959	INSIDE
chr15:062467423-062467475	A_17_P09715023	chr15	62467423	32.4844	0.369409	6.45838	0.00540344	TRIP4	NM_016213	INSIDE
chr9:075736712-075736770	A_17_P06747067	chr9	75736712	2263.05	128.66	4.13664	0.00541415	PCSK5	NM_006200	INSIDE
chr3:188491090-188491143	A_17_P02837919	chr3	188491090	217.704	12.3792	4.13638	0.00541473	MASP1	NM_001031849	INSIDE
chr14:028306991-028307035	A_17_P16689787	chr14	28306991	563.167	6.72136	6.38867	0.00541564	FOXG1B	NM_005249	INSIDE
chr4:004980451-004980495	A_17_P02902321	chr4	4980451	529.102	30.1062	4.13541	0.00541629	MSX1	NM_002448	INSIDE
chr6:127481806-127481859	A_17_P15859930	chr6	127481806	376.657	21.4811	4.13212	0.005422	RSPO3	NM_032784	INSIDE
chr2:063190506-063190552	A_17_P01229777	chr2	63190506	184.32	10.5265	4.13011	0.00542562	OTX1	NM_014562	INSIDE
chr6:010523498-010523557	A_17_P04550257	chr6	10523498	904.221	51.6444	4.12999	0.00542565	TFAP2A	NM_003220	PROMOTER
chr17:074349005-074349049	A_17_P17020550	chr17	74349005	104.251	1.27097	6.35799	0.0054272	USP36	NM_025090	PROMOTER
chr1:044546431-044546490	A_17_P00171632	chr1	44546431	405.811	23.2128	4.12781	0.00542946	C1orf164	NM_018150	INSIDE
chr6:001256279-001256328	A_17_P04506428	chr6	1256279	698.819	39.9946	4.12704	0.00543077	FOXQ1	NM_033260	PROMOTER
chr3:188949870-188949929	A_17_P02839935	chr3	188949870	267.161	15.3466	4.12172	0.00544011	BCL6	NM_001706	PROMOTER
chr5:033973062-033973107	A_17_P03863440	chr5	33973062	126.33	7.25877	4.12133	0.00544102	RLN3R1	NM_016568	INSIDE
chr8:054325697-054325744	A_17_P06124465	chr8	54325697	313.842	18.0664	4.11866	0.00544548	OPRK1	NM_000912	INSIDE
chr7:027058197-027058242	A_17_P05378657	chr7	27058197	5646.02	325.155	4.11803	0.0054465	EVX1	NM_001989	INSIDE
chr4:046234308-046234367	A_17_P03082571	chr4	46234308	355.578	20.4786	4.11798	0.00544668	GABRA2	NM_000807	PROMOTER
chr5:159278102-159278161	A_17_P04409257	chr5	159278102	188.187	10.8403	4.1177	0.00544733	ADRA1B	NM_000679	INSIDE
chr5:011954998-011955057	A_17_P03770012	chr5	11954998	265.908	15.3248	4.11698	0.00544845	CTNND2	NM_001332	INSIDE
chr8:114519968-114520025	A_17_P06396048	chr8	114519968	517.095	29.8335	4.11542	0.00545111	CSMD3	NM_198123	PROMOTER
chr4:188021219-188021276	A_17_P03694208	chr4	188021219	264.654	15.303	4.11222	0.00545682	FAT	NM_005245	PROMOTER
chr6:078233912-078233971	A_17_P04834798	chr6	78233912	274.931	15.9067	4.11136	0.00545835	HTR1B	NM_000863	PROMOTER
chr1:224502886-224502930	A_17_P15188232	chr1	224502886	274.329	15.8952	4.10924	0.00546211	WNT3A	NM_033131	INSIDE
chr9:070652738-070652797	A_17_P16225147	chr9	70652738	443.955	25.756	4.10743	0.00546529	TRPM3	NM_001007470	INSIDE
chr6:075971679-075971723	A_17_P04825683	chr6	75971679	3162.86	183.677	4.10599	0.00546777	COL12A1	NM_004370	INSIDE
chr4:147918310-147918369	A_17_P03505530	chr4	147918310	410.299	23.8618	4.1039	0.00547154	POU4F2	NM_004575	INSIDE
chr18:031075685-031075744	A_17_P10626712	chr18	31075685	16.6893	0.149797	6.79977	0.00548322	ZNF397	NM_032347	INSIDE
chr4:075675519-075675578	A_17_P03186460	chr4	75675519	319.584	18.6727	4.09719	0.00548356	AREG	NM_001657	PROMOTER
chr1:244667800-244667859	A_17_P00931596	chr1	244667800	85.6258	5.02185	4.09175	0.00549472	OR2M2	NM_001004688	PROMOTER
chrX:057198326-057198385	A_17_P11761002	chrX	57198326	27.661	0.36152	6.25763	0.00549879	FLJ31204	NM_174912	INSIDE
chr11:006817980-006818039	A_17_P07620773	chr11	6817980	27.661	0.36152	6.25763	0.00550184	OR10A5	NM_178168	PROMOTER
chr5:017273393-017273452	A_17_P03793270	chr5	17273393	195.394	11.4998	4.0867	0.00550247	BASP1	NM_006317	INSIDE
chr6:001330441-001330485	A_17_P04506736	chr6	1330441	1318.64	78.0775	4.078	0.00551823	FOXF2	NM_001452	PROMOTER
chr22:048538521-048538579	A_17_P11548188	chr22	48538521	25.2074	0.357038	6.14162	0.00552487	BRD1	NM_014577	INSIDE
chr9:123855917-123855961	A_17_P06954346	chr9	123855917	1245	73.9087	4.07425	0.00552509	LHX2	NM_004789	INSIDE
chr7:116555235-116555294	A_17_P05722015	chr7	116555235	311.135	18.4727	4.07407	0.00552547	WNT2	NM_003391	INSIDE
chr17:023758443-023758487	A_17_P10272008	chr17	23758443	62.5278	0.911595	6.09996	0.00552603	HCP1	NM_080669	PROMOTER
chr8:114518234-114518281	A_17_P06396029	chr8	114518234	508.905	30.265	4.07167	0.00552984	CSMD3	NM_052900	INSIDE
chr3:154036534-154036580	A_17_P15501317	chr3	154036534	457.778	27.2266	4.07156	0.00553007	P2RY1	NM_002563	INSIDE
chr4:084615134-084615193	A_17_P03226038	chr4	84615134	274.204	16.309	4.07151	0.00553021	HPSE	NM_006665	PROMOTER
chr5:001936367-001936426	A_17_P03715890	chr5	1936367	205.775	12.2415	4.07121	0.00553085	IRX4	NM_016358	PROMOTER
chr1:038179640-038179687	A_17_P00145818	chr1	38179640	1038.19	61.7691	4.07104	0.005531	POU3F1	NM_002699	INSIDE
chr6:000334408-000334467	A_17_P04501372	chr6	334408	579.102	34.5017	4.06908	0.00553462	IRF4	NM_002460	PROMOTER
chr5:002809279-002809327	A_17_P03721138	chr5	2809279	653.008	38.9597	4.06705	0.00553838	CEI	NM_178569	DOWNSTREAM
chr6:046090558-046090617	A_17_P04709708	chr6	46090558	308.475	18.4091	4.06666	0.00553914	CLIC5	NM_016929	INSIDE
chr6:142666360-142666419	A_17_P05129437	chr6	142666360	175.669	10.4899	4.06579	0.00554087	GPR126	NM_001032394	INSIDE
chr3:188950508-188950566	A_17_P02839941	chr3	188950508	198.019	11.8347	4.06454	0.00554316	BCL6	NM_001706	PROMOTER
chr9:109620521-109620580	A_17_P06891919	chr9	109620521	135.163	8.08465	4.06338	0.00554543	PALM2-AKAP2	NM_007203	PROMOTER
chr3:050205730-050205774	A_17_P02230175	chr3	50205730	502.971	30.1151	4.06192	0.0055479	GNAT1	NM_000172	INSIDE
chr5:036025480-036025529	A_17_P03871371	chr5	36025480	88.2758	5.29307	4.05984	0.00555252	UGT3A1	NM_152404	INSIDE
chr11:117985479-117985523	A_17_P16507583	chr11	117985479	370.253	5.6718	6.02856	0.00555265	PHLDB1	NM_015157	INSIDE
chr8:146049497-146049541	A_17_P16150910	chr8	146049497	43.6284	2.61298	4.0615	0.00555296	COMMD5	NM_014066	PROMOTER
chr2:162099214-162099258	A_17_P15349477	chr2	162099214	372.559	22.426	4.05422	0.00556226	TBR1	NM_006593	INSIDE
chr3:051680465-051680509	A_17_P15438006	chr3	51680465	110.693	6.69418	4.04752	0.00557542	TEX264	NM_015926	INSIDE
chr1:227604367-227604426	A_17_P00857546	chr1	227604367	82.7735	5.01368	4.04523	0.00557965	TRIM67	NM_001004342	PROMOTER
chrX:152807454-152807498	A_17_P12036158	chrX	152807454	54.8087	0.875773	5.9677	0.00558503	IRAK1	NM_001569	PROMOTER
chr4:111917123-111917182	A_17_P03347293	chr4	111917123	1073.86	65.3249	4.03903	0.0055909	PITX2	NM_153427	PROMOTER
chr6:007674060-007674115	A_17_P04536913	chr6	7674060	2648.06	161.604	4.0344	0.00559973	BMP6	NM_001718	INSIDE
chr19:051014950-051014994	A_17_P10975901	chr19	51014950	113.907	1.87434	5.92533	0.00560069	SYMPK	NM_004819	INSIDE
chr6:100163416-100163460	A_17_P04931740	chr6	100163416	610.53	37.2832	4.03347	0.00560154	PRDM13	NM_021620	INSIDE
chr6:063053750-063053802	A_17_P04769084	chr6	63053750	335.831	20.5088	4.03342	0.00560167	KHDRBS2	NM_152688	INSIDE
chr3:123222750-123222809	A_17_P15480651	chr3	123222750	453.236	27.7041	4.03209	0.00560419	ILDR1	NM_175924	INSIDE
chr2:222990267-222990326	A_17_P01917033	chr2	222990267	4982.06	304.748	4.03105	0.00560614	PAX3	NM_013942	PROMOTER
chr7:026910202-026910255	A_17_P05377526	chr7	26910202	5206.26	318.484	4.03095	0.00560634	HOXA1	NM_153620	PROMOTER
chr6:138232384-138232442	A_17_P05110460	chr6	138232384	421.339	25.7845	4.03041	0.00560741	TNFAIP3	NM_006290	INSIDE
chr4:076214243-076214294	A_17_P03188647	chr4	76214243	334.316	20.4717	4.02951	0.00560919	DKFZP564O0823	NM_015393	PROMOTER
chr9:000963647-000963698	A_17_P06542222	chr9	963647	500.882	30.6854	4.02885	0.0056104	DMRT3	NM_021240	PROMOTER
chr1:144459429-144459488	A_17_P00500247	chr1	144459429	361.492	22.1582	4.02805	0.00561197	GJA5	NM_181703	PROMOTER
chr4:075332994-075333053	A_17_P03184932	chr4	75332994	307.416	18.854	4.02725	0.00561352	CXCL2	NM_002089	PROMOTER
chr8:070665437-070665496	A_17_P06197127	chr8	70665437	282.945	17.3673	4.02607	0.0056158	SULF1	NM_015170	INSIDE
chr6:122974206-122974259	A_17_P05034390	chr6	122974206	417.789	25.6972	4.02309	0.00562151	PKIB	NM_032471	INSIDE
chrX:047258167-047258221	A_17_P11739301	chrX	47258167	128.644	2.1921	5.87493	0.0056255	ELK1	NM_005229	INSIDE
chr7:116556840-116556884	A_17_P05722029	chr7	116556840	2440.9	150.504	4.01954	0.00562835	WNT2	NM_003391	INSIDE
chr5:001280886-001280945	A_17_P03712904	chr5	1280886	224.8	13.879	4.01767	0.00563213	SLC6A18	NM_182632	INSIDE
chrX:118149156-118149215	A_17_P17391309	chrX	118149156	50.7357	0.867239	5.87043	0.00563391	PGRMC1	NM_006667	PROMOTER
chr3:198952984-198953039	A_17_P02884032	chr3	198952984	130.514	8.07579	4.01445	0.00563863	BC033615	NONE	Unknown
chr7:142073491-142073550	A_17_P05837956	chr7	142073491	125.986	7.7985	4.01392	0.00563971	EPHB6	NM_004445	INSIDE
chr14:023671105-023671149	A_17_P09170371	chr14	23671105	362.042	6.3197	5.84016	0.00564104	LOC161247	NM_203402	INSIDE
chr17:000262113-000262172	A_17_P10186239	chr17	262113	20.5627	0.340422	5.91656	0.00564417	LOC400566	NM_001013672	INSIDE
chr7:156304391-156304442	A_17_P05895725	chr7	156304391	1345.26	83.4393	4.01101	0.00564499	HLXB9	NM_005515	PROMOTER
chr8:054324801-054324860	A_17_P06124456	chr8	54324801	163.701	10.1557	4.0107	0.0056458	OPRK1	NM_000912	INSIDE
chr5:007447929-007447976	A_17_P03746287	chr5	7447929	339.193	21.0905	4.00744	0.00565204	ADCY2	NM_020546	PROMOTER
chr14:020225959-020226013	A_17_P09155747	chr14	20225959	170.752	3.02778	5.8175	0.00565319	RNASE4	NM_194431	PROMOTER
chr9:114344187-114344246	A_17_P06912153	chr9	114344187	172.772	10.7657	4.00436	0.00565819	DFNB31	NM_015404	INSIDE
chr2:072289061-072289120	A_17_P01272110	chr2	72289061	276.093	17.2116	4.0037	0.00565947	CYP26B1	NM_019885	PROMOTER
chr5:054506601-054506660	A_17_P15691564	chr5	54506601	214.427	13.3705	4.00336	0.00566015	FLJ37927	NM_152623	PROMOTER
chr6:123149552-123149611	A_17_P15857599	chr6	123149552	51.9174	3.23591	4.00397	0.00566254	SMPDL3A	NM_006714	PROMOTER
chr6:027401956-027402015	A_17_P04628296	chr6	27401956	116.014	7.24052	4.00206	0.0056671	FKSG83	NM_032030	DOWNSTREAM
chr6:029660166-029660223	A_17_P04637086	chr6	29660166	515.36	32.3066	3.99568	0.00567527	OR2H2	NM_007160	PROMOTER
chr6:032842209-032842264	A_17_P04648252	chr6	32842209	334.193	20.9647	3.99465	0.00567735	HLA-DQB2	NM_182549	PROMOTER
chr1:114407532-114407576	A_17_P15101493	chr1	114407532	192.686	12.1026	3.99286	0.00568121	SYT6	NM_205848	INSIDE
chr1:144473076-144473135	A_17_P00500347	chr1	144473076	320.033	20.1167	3.99176	0.00568313	GJA5	NM_005266	PROMOTER
chr5:007451019-007451078	A_17_P03746307	chr5	7451019	402.565	25.3177	3.991	0.00568461	ADCY2	NM_020546	INSIDE
chr7:106400808-106400867	A_17_P05672783	chr7	106400808	9.05735	0.552038	4.03625	0.00568926	HBP1	NM_012257	PROMOTER
chr1:114409635-114409685	A_17_P15101506	chr1	114409635	3085.49	194.605	3.98688	0.00569284	SYT6	NM_205848	PROMOTER
chr6:101023266-101023317	A_17_P04935964	chr6	101023266	204.28	12.8916	3.98605	0.00569461	SIM1	NM_005068	PROMOTER
chr6:010167528-010167587	A_17_P04548357	chr6	10167528	114.143	7.23656	3.97939	0.00570907	OFCC1	NM_153003	INSIDE
chr1:240539038-240539087	A_17_P00914920	chr1	240539038	9.05735	0.552038	4.03625	0.00570944	ZNF238	NM_205768	PROMOTER
chr5:043349765-043349824	A_17_P03903434	chr5	43349765	31.4505	1.98725	3.98424	0.00570994	HMGCS1	NM_002130	PROMOTER
chr7:027057466-027057516	A_17_P05378652	chr7	27057466	2902.78	184.2	3.97809	0.00571058	EVX1	NM_001989	INSIDE
chr9:000202976-000203035	A_17_P06538433	chr9	202976	169.326	10.7485	3.9776	0.00571183	C9orf66	NM_152569	DOWNSTREAM
chr6:010519051-010519110	A_17_P04550231	chr6	10519051	454.014	28.9066	3.97327	0.00572041	TFAP2A	NM_001032280	INSIDE
chr6:166550722-166550766	A_17_P05240301	chr6	166550722	586.895	37.3917	3.97231	0.00572233	T	NM_003181	INSIDE
chr7:026982367-026982414	A_17_P05378114	chr7	26982367	2109.42	134.537	3.97077	0.00572545	hsa-mir-196b	hsa-mir-196b	INSIDE
chr1:086337858-086337917	A_17_P15081228	chr1	86337858	154.197	9.83804	3.97026	0.00572682	COL24A1	NM_152890	PROMOTER
chr9:122502960-122503019	A_17_P16260899	chr9	122502960	113.207	7.23456	3.96791	0.00573184	OR1L1	NM_001005236	PROMOTER
chr4:082749527-082749582	A_17_P03218029	chr4	82749527	420.715	26.9042	3.96694	0.00573332	RASGEF1B	NM_152545	INSIDE
chr4:155067839-155067885	A_17_P03539699	chr4	155067839	618.713	39.5854	3.96623	0.00573477	SFRP2	NM_003013	PROMOTER
chr7:027057355-027057414	A_17_P05378651	chr7	27057355	7118.58	455.548	3.96592	0.00573539	EVX1	NM_001989	INSIDE
chr6:032838693-032838749	A_17_P04648233	chr6	32838693	512.142	32.862	3.96205	0.00574337	HLA-DQB2	NM_182549	INSIDE
chr2:102260800-102260859	A_17_P01366409	chr2	102260800	187.895	12.0599	3.96163	0.0057444	IL1RL2	NM_003854	PROMOTER
chr7:026933418-026933477	A_17_P05377703	chr7	26933418	361.004	23.1854	3.96073	0.00574615	HOXA3	NM_030661	PROMOTER
chr7:070042101-070042145	A_17_P05527774	chr7	70042101	253.018	16.2864	3.95751	0.0057528	WBSCR17	NM_022479	PROMOTER
chr8:053484743-053484802	A_17_P06121085	chr8	53484743	445.583	28.6905	3.95705	0.00575371	ST18	NM_014682	INSIDE
chr7:016698721-016698780	A_17_P05328981	chr7	16698721	86.198	5.55117	3.95679	0.00575496	BCMP11	NM_176813	PROMOTER
chr3:188944239-188944283	A_17_P02839878	chr3	188944239	593.06	38.2364	3.95516	0.00575761	BCL6	NM_138931	PROMOTER
chr6:031187212-031187264	A_17_P04642447	chr6	31187212	1735.62	111.903	3.95513	0.00575765	C6orf15	NM_014070	INSIDE
chr5:036643954-036644013	A_17_P03873867	chr5	36643954	227.004	14.6473	3.954	0.0057601	SLC1A3	NM_004172	INSIDE
chr9:071611436-071611492	A_17_P06729021	chr9	71611436	331.076	21.3848	3.9525	0.00576317	TMEM2	NM_013390	INSIDE
chr19:006623091-006623135	A_17_P10870766	chr19	6623091	319.493	6.51501	5.61587	0.00576465	TNFSF14	NM_172014	PROMOTER
chr1:183381197-183381255	A_17_P00662991	chr1	183381197	357.171	23.087	3.95146	0.00576532	PTGS2	NM_000963	PROMOTER
chr6:152219209-152219268	A_17_P05173999	chr6	152219209	251.141	16.2499	3.95	0.00576843	ESR1	NM_000125	PROMOTER
chr7:155103716-155103767	A_17_P05889778	chr7	155103716	6044.86	391.314	3.94931	0.00576977	SHH	NM_000193	INSIDE
chr5:054356379-054356424	A_17_P03936932	chr5	54356379	292.936	18.9717	3.94867	0.00577123	GZMK	NM_002104	INSIDE
chrX:028568553-028568612	A_17_P11664035	chrX	28568553	12.3605	0.14158	6.44798	0.00577295	IL1RAPL1	NM_014271	INSIDE
chr7:027014415-027014459	A_17_P15920290	chr7	27014415	3158.75	204.787	3.94716	0.00577426	HOXA13	NM_000522	PROMOTER
chr5:007925325-007925384	A_17_P03749214	chr5	7925325	35.6845	2.31193	3.94813	0.00577583	MTRR	NM_002454	INSIDE
chr21:038566279-038566326	A_17_P11382856	chr21	38566279	333.853	6.90125	5.59621	0.00577671	KCNJ15	NM_170737	INSIDE
chr4:075095053-075095107	A_17_P03183974	chr4	75095053	315.393	20.484	3.94459	0.00577972	CXCL1	NM_001511	PROMOTER
chr1:092126413-092126472	A_17_P00376204	chr1	92126413	128.479	8.34379	3.94468	0.00577994	BRDT	NM_207189	PROMOTER
chr5:036644453-036644512	A_17_P03873872	chr5	36644453	155.747	10.1254	3.94315	0.00578332	SLC1A3	NM_004172	INSIDE
chr10:027830333-027830392	A_17_P07143988	chr10	27830333	224.29	14.6016	3.94116	0.00578699	RAB18	NM_021252	PROMOTER
chr7:149645305-149645364	A_17_P05867896	chr7	149645305	119.513	7.78158	3.94096	0.00578765	GIMAP7	NM_153236	PROMOTER
chr2:113752865-113752911	A_17_P01409490	chr2	113752865	326.066	21.2534	3.9394	0.00579063	PAX8	NM_013992	PROMOTER
chr9:136974328-136974372	A_17_P16278005	chr9	136974328	45.217	2.9469	3.9396	0.0057929	KIAA1984	NM_032874	INSIDE
chr2:131346509-131346553	A_17_P01478992	chr2	131346509	450.868	29.4216	3.93776	0.00579406	FLJ38377	NM_152698	PROMOTER
chr6:028334562-028334615	A_17_P04632055	chr6	28334562	22.1723	1.44324	3.94137	0.00579567	ZNF307-C6orf194	NM_019110-NM_001007531	DIVERGENT_PROMOTER
chr2:233938405-233938464	A_17_P01966380	chr2	233938405	26.2417	1.71483	3.93573	0.00580613	ATG16L1	NM_017974	PROMOTER
chr15:095129304-095129361	A_17_P09856614	chr15	95129304	465.453	10.1514	5.51888	0.00582526	SPATA8	NM_173499	INSIDE
chr9:032371560-032371619	A_17_P06687199	chr9	32371560	167.29	11.0288	3.92301	0.00582577	ACO1	NM_002197	PROMOTER
chr4:037280250-037280309	A_17_P15559918	chr4	37280250	344.253	22.7376	3.92032	0.00583134	BC037906	NONE	Unknown
chr2:222991887-222991932	A_17_P01917047	chr2	222991887	2098.86	138.737	3.91918	0.00583369	PAX3	NM_013942	PROMOTER
chr6:046403067-046403126	A_17_P04711249	chr6	46403067	234.365	15.5313	3.91551	0.0058417	DSCR1L1	NM_005822	PROMOTER
chr6:150557977-150558036	A_17_P05166326	chr6	150557977	395.003	26.2327	3.91242	0.00584836	PPP1R14C	NM_030949	INSIDE
chr5:001057139-001057185	A_17_P03711752	chr5	1057139	756.596	50.2752	3.91161	0.00585009	NKD2	NM_033120	PROMOTER
chr6:126108722-126108774	A_17_P05050100	chr6	126108722	513.225	34.1722	3.9087	0.00585644	HEY2	NM_012259	PROMOTER
chr2:240710645-240710704	A_17_P02000835	chr2	240710645	481.57	32.0701	3.90845	0.00585699	OR6B3	NM_173351	PROMOTER
chr1:047611235-047611279	A_17_P00181983	chr1	47611235	1168.89	77.8763	3.90781	0.00585834	FOXD2	NM_004474	PROMOTER
chr5:100265162-100265217	A_17_P04142832	chr5	100265162	464.094	30.9797	3.90502	0.00586448	ST8SIA4	NM_175052	INSIDE
chr5:180010248-180010307	A_17_P15773575	chr5	180010248	716.388	47.8386	3.90449	0.00586562	FLT4	NM_002020	PROMOTER
chr3:011011019-011011063	A_17_P02058583	chr3	11011019	257.307	17.207	3.90242	0.00587023	SLC6A1	NM_003042	INSIDE
chr3:062332155-062332206	A_17_P02288210	chr3	62332155	6196.38	414.458	3.90213	0.00587078	ZNF312	NM_018008	INSIDE
chr7:026992586-026992645	A_17_P05378193	chr7	26992586	348.83	23.3882	3.89867	0.00587844	HOXA10	NM_018951	PROMOTER
chr3:142684809-142684868	A_17_P02629778	chr3	142684809	47.9397	3.21237	3.89951	0.00587903	RASA2	NM_006506	PROMOTER
chr4:001094756-001094812	A_17_P02888529	chr4	1094756	928.221	62.2869	3.89747	0.00588104	LOC285498	NM_194439	INSIDE
chr18:059524686-059524745	A_17_P10766528	chr18	59524686	25.1988	0.565503	5.47768	0.00588295	SERPINB11	NM_080475	PROMOTER
chr8:086345325-086345369	A_17_P06267854	chr8	86345325	214.698	14.4389	3.89427	0.00588821	CA13	NM_198584	INSIDE
chr6:031197309-031197359	A_17_P04642522	chr6	31197309	8593.3	577.979	3.89412	0.00588843	CDSN	NM_001264	PROMOTER
chr7:026935663-026935722	A_17_P05377725	chr7	26935663	4463.8	301.197	3.8895	0.00589868	HOXA3	NM_030661	PROMOTER
chr2:172791442-172791489	A_17_P01675549	chr2	172791442	4640.76	313.168	3.88935	0.00589901	DLX2	NM_004405	INSIDE
chr10:124898445-124898489	A_17_P07539332	chr10	124898445	387.392	9.13287	5.40658	0.00590174	HMX2	NM_005519	INSIDE
chr17:075430963-075431007	A_17_P17023015	chr17	75430963	828.665	19.6147	5.40078	0.00590578	CBX4	NM_003655	PROMOTER
chr1:086335208-086335267	A_17_P00350307	chr1	86335208	272.676	18.4477	3.88567	0.00590737	COL24A1	NM_152890	PROMOTER
chr7:129875401-129875445	A_17_P05782403	chr7	129875401	176.52	11.9647	3.88298	0.00591337	KLF14	NM_138693	INSIDE
chr5:001257201-001257247	A_17_P03712758	chr5	1257201	186.87	12.6773	3.88172	0.00591631	SLC6A19	NM_001003841	INSIDE
chr3:138966978-138967022	A_17_P02613092	chr3	138966978	1577.48	107.154	3.87986	0.00592022	SOX14	NM_004189	INSIDE
chr6:160738798-160738842	A_17_P05212257	chr6	160738798	241.905	16.4631	3.87713	0.00592645	SLC22A3	NM_021977	PROMOTER
chr7:044139049-044139095	A_17_P05457179	chr7	44139049	157.064	10.6963	3.87617	0.00592884	CAMK2B	NM_172084	PROMOTER
chr1:086332666-086332710	A_17_P00350285	chr1	86332666	862.927	58.823	3.87479	0.00593167	COL24A1	NM_152890	INSIDE
chr7:155104271-155104315	A_17_P05889783	chr7	155104271	7787.1	530.908	3.87455	0.0059322	SHH	NM_000193	INSIDE
chr6:045495763-045495815	A_17_P04706078	chr6	45495763	2684.34	183.103	3.87384	0.00593379	RUNX2	NM_004348	PROMOTER
chr9:000493174-000493233	A_17_P06539931	chr9	493174	447.593	30.5356	3.87362	0.00593431	ANKRD15	NM_015158	PROMOTER
chr9:136318980-136319024	A_17_P07007697	chr9	136318980	4547.09	310.479	3.87238	0.00593711	LHX3	NM_014564	INSIDE
chr8:075394912-075394971	A_17_P06218501	chr8	75394912	151.981	10.3928	3.87024	0.00594223	JPH1	NM_020647	INSIDE
chr2:219651117-219651161	A_17_P01899297	chr2	219651117	278.516	19.0546	3.86955	0.00594362	CDK5R2	NM_003936	INSIDE
chr7:027011992-027012036	A_17_P05378347	chr7	27011992	3112.5	212.979	3.86929	0.00594411	HOXA13	NM_000522	INSIDE
chr5:042461804-042461863	A_17_P03899781	chr5	42461804	240.012	16.4242	3.86921	0.00594437	GHR	NM_000163	INSIDE
chr12:105481818-105481877	A_17_P08596306	chr12	105481818	321.853	7.90655	5.34721	0.00594511	RFX4	NM_213594	INSIDE
chr2:157012213-157012263	A_17_P01598614	chr2	157012213	705.971	48.3388	3.86836	0.00594625	NR4A2	NM_006186	INSIDE
SM_09	SM_09	NONE	NONE	20.9685	1.43072	3.87342	0.00594726	SM_09	NONE	NONE
chr2:097721041-097721085	A_17_P01346296	chr2	97721041	17.6028	1.19299	3.88315	0.00594874	COX5B	NM_001862	INSIDE
chr8:042512810-042512857	A_17_P06095598	chr8	42512810	37.4373	2.56429	3.86785	0.00595139	C8orf40	NM_138436	PROMOTER
chr1:150095090-150095143	A_17_P00515628	chr1	150095090	299.314	20.547	3.86466	0.0059547	PGLYRP3	NM_052891	INSIDE
chr6:170521255-170521312	A_17_P05257611	chr6	170521255	1022.35	70.2013	3.86425	0.00595562	DLL1	NM_005618	PROMOTER
chr1:090895864-090895913	A_17_P00371062	chr1	90895864	347.269	23.8662	3.86301	0.0059585	BARHL2	NM_020063	PROMOTER
chr7:154300900-154300944	A_17_P05885760	chr7	154300900	334.395	22.9848	3.8628	0.00595896	HTR5A	NM_024012	INSIDE
chr1:167955669-167955728	A_17_P00593895	chr1	167955669	164.421	11.3033	3.86257	0.00595961	FMO1	NM_002021	INSIDE
chr2:200160318-200160362	A_17_P01806051	chr2	200160318	627.524	43.3502	3.85556	0.00597556	FLJ32063	NM_153031	INSIDE
chr7:027001279-027001323	A_17_P05378254	chr7	27001279	2598.54	180.086	3.85095	0.00598621	HOXA11	NM_005523	PROMOTER
chr4:025333929-025333988	A_17_P02991121	chr4	25333929	294.089	20.402	3.84947	0.00598971	SLC34A2	NM_006424	INSIDE
chr4:084813698-084813757	A_17_P03226674	chr4	84813698	261.864	18.1755	3.84875	0.00599143	MGC11324	NM_032717	PROMOTER
chr4:054808762-054808808	A_17_P03104051	chr4	54808762	773.883	53.8234	3.84581	0.00599816	GSH2	NM_133267	INSIDE
chr4:021624442-021624501	A_17_P02974416	chr4	21624442	166.752	11.604	3.84501	0.00600022	KCNIP4	NM_147182	INSIDE
chr3:062338230-062338289	A_17_P02288257	chr3	62338230	119.381	8.30953	3.84466	0.00600124	ZNF312	NM_018008	PROMOTER
chr9:107329649-107329693	A_17_P06881137	chr9	107329649	233.766	16.2856	3.8434	0.00600389	KLF4	NM_004235	INSIDE
chr7:155104065-155104114	A_17_P05889781	chr7	155104065	3479.24	242.868	3.84053	0.00601048	SHH	NM_000193	INSIDE
chr7:015498546-015498597	A_17_P05323171	chr7	15498546	849.945	59.345	3.84017	0.00601134	MEOX2	NM_005924	INSIDE
chr9:068550984-068551043	A_17_P06714406	chr9	68550984	518.907	36.2811	3.83819	0.00601602	PIP5K1B	NM_003558	INSIDE
chr6:101022940-101022999	A_17_P04935961	chr6	101022940	148.431	10.3786	3.83812	0.00601667	SIM1	NM_005068	PROMOTER
chr21:035185454-035185503	A_17_P11366351	chr21	35185454	353.231	9.27864	5.25055	0.00602045	RUNX1	NM_001001890	PROMOTER
chr9:000206052-000206111	A_17_P06538452	chr9	206052	428.351	30.0011	3.83571	0.00602185	C9orf66	NM_152569	PROMOTER
chr3:144320948-144320998	A_17_P02636318	chr3	144320948	257.839	18.0723	3.83462	0.00602449	CHST2	NM_004267	PROMOTER
chr5:037877121-037877171	A_17_P03878929	chr5	37877121	764.079	53.5809	3.83393	0.00602601	GDNF	NM_000514	PROMOTER
chr19:012303699-012303753	A_17_P10886216	chr19	12303699	104.016	2.73997	5.2465	0.0060263	ZNF563	NM_145276	INSIDE
chr4:156021366-156021424	A_17_P03544551	chr4	156021366	745.502	52.3355	3.83235	0.00602976	LRAT	NM_004744	PROMOTER
chr7:027053618-027053664	A_17_P05378620	chr7	27053618	6356.52	446.425	3.83175	0.00603117	EVX1	NM_001989	PROMOTER
chr7:000289557-000289607	A_17_P05259781	chr7	289557	660.675	46.4056	3.83157	0.0060316	FAM20C	NM_020223	INSIDE
chr4:046874551-046874610	A_17_P03085327	chr4	46874551	322.046	22.6435	3.8301	0.00603516	GABRB1	NM_000812	INSIDE
chr6:094184084-094184130	A_17_P04903792	chr6	94184084	147.543	10.3749	3.82996	0.00603568	EPHA7	NM_004440	INSIDE
chr6:137857652-137857706	A_17_P15865920	chr6	137857652	608.425	42.8352	3.82821	0.00603958	OLIG3	NM_175747	PROMOTER
chr4:046234197-046234256	A_17_P03082570	chr4	46234197	358.293	25.2364	3.82756	0.00604117	GABRA2	NM_000807	PROMOTER
chr7:020604864-020604923	A_17_P05348508	chr7	20604864	332.901	23.4545	3.82716	0.0060421	SP8	NM_198956	PROMOTER
chr2:056058481-056058540	A_17_P01196666	chr2	56058481	265.193	18.6996	3.82597	0.00604499	EFEMP1	NM_018894	INSIDE
chr8:069405419-069405474	A_17_P06191336	chr8	69405419	496.204	34.9977	3.8256	0.00604578	BC041961	NONE	Unknown
chr9:133431749-133431793	A_17_P06994779	chr9	133431749	86.4878	6.10491	3.82445	0.0060492	ADAMTSL2	NM_014694	INSIDE
chr5:037870231-037870286	A_17_P03878884	chr5	37870231	738.106	52.151	3.82306	0.00605183	GDNF	NM_199234	INSIDE
chr9:107333123-107333173	A_17_P06881154	chr9	107333123	604.578	42.7302	3.8226	0.00605293	KLF4	NM_004235	PROMOTER
chr7:050632534-050632589	A_17_P05484471	chr7	50632534	868.183	61.3773	3.82222	0.00605383	GRB10	NM_001001555	INSIDE
chr3:191526835-191526894	A_17_P02853379	chr3	191526835	150.866	10.6717	3.8214	0.00605606	CLDN1	NM_021101	PROMOTER
chr2:222991410-222991469	A_17_P01917043	chr2	222991410	2777.61	196.5	3.82124	0.00605616	PAX3	NM_013942	PROMOTER
chr10:026769024-026769083	A_17_P07140676	chr10	26769024	168.142	11.9066	3.81985	0.00605977	APBB1IP	NM_019043	INSIDE
chr6:007486269-007486325	A_17_P04535906	chr6	7486269	177.289	12.584	3.81644	0.00606782	DSP	NM_001008844	PROMOTER
chr6:033016095-033016154	A_17_P04648983	chr6	33016095	182.403	12.948	3.81633	0.00606818	HLA-DMB	NM_002118	INSIDE
chr1:176276160-176276219	A_17_P00630305	chr1	176276160	536.864	38.112	3.81624	0.00606819	NPHS2	NM_014625	INSIDE
chr9:001041332-001041391	A_17_P06542677	chr9	1041332	521.174	37.004	3.81601	0.00606873	DMRT2	NM_006557	PROMOTER
chr6:122974560-122974619	A_17_P05034395	chr6	122974560	109.215	7.75994	3.81498	0.00607191	PKIB	NM_032471	INSIDE
chr8:017055790-017055849	A_17_P05981064	chr8	17055790	282.458	20.0738	3.81465	0.00607206	ZDHHC2	NM_016353	PROMOTER
chr17:019929004-019929048	A_17_P10263200	chr17	19929004	12.595	0.317585	5.30957	0.00607312	SPECC1	NM_001033553	PROMOTER
chr6:075974076-075974125	A_17_P04825695	chr6	75974076	2959.48	210.496	3.81348	0.00607482	COL12A1	NM_080645	PROMOTER
chr9:130570588-130570647	A_17_P06981682	chr9	130570588	365.077	25.9685	3.81336	0.00607515	PRDM12	NM_021619	INSIDE
chr4:145922515-145922574	A_17_P03496684	chr4	145922515	77.6689	5.52345	3.8137	0.00607515	HHIP	NM_022475	PROMOTER
chr6:010522856-010522905	A_17_P04550253	chr6	10522856	550.149	39.153	3.81263	0.00607691	TFAP2A	NM_001032280	PROMOTER
chr1:243944513-243944572	A_17_P00929084	chr1	243944513	315.549	22.4608	3.81238	0.00607753	OR2B11	NM_001004492	PROMOTER
chr19:050428699-050428758	A_17_P10974132	chr19	50428699	216.052	5.95691	5.18067	0.00607893	XTP7	NM_138568	INSIDE
chr4:155067303-155067347	A_17_P03539697	chr4	155067303	3543.36	252.415	3.81125	0.0060802	SFRP2	NM_003013	INSIDE
chr10:035968073-035968122	A_17_P07179566	chr10	35968073	351.337	25.0315	3.81104	0.00608076	FZD8	NM_031866	INSIDE
chr1:202154544-202154588	A_17_P00747397	chr1	202154544	303.31	21.6165	3.81058	0.00608187	hsa-mir-135b	hsa-mir-135b	PROMOTER
chr2:119319937-119319981	A_17_P01432329	chr2	119319937	612.652	43.6692	3.81038	0.00608233	EN1	NM_001426	INSIDE
chr3:155323653-155323712	A_17_P15501876	chr3	155323653	350.865	25.0181	3.80987	0.00608359	SGEF	NM_015595	INSIDE
chr4:030400517-030400564	A_17_P03014074	chr4	30400517	162.429	11.582	3.80986	0.00608386	PCDH7	NM_032456	INSIDE
chr9:068584624-068584683	A_17_P06714574	chr9	68584624	180.811	12.932	3.80546	0.00609454	PIP5K1B	NM_001031687	PROMOTER
chrX:129244931-129244982	A_17_P11951408	chrX	129244931	1257.03	35.1198	5.16159	0.00609497	GPR119	NM_178471	INSIDE
chr7:121538403-121538450	A_17_P05745507	chr7	121538403	4656.24	333.112	3.80508	0.00609516	LOC389549	NM_001024613	INSIDE
chr10:045189365-045189410	A_17_P07198564	chr10	45189365	210.968	15.0971	3.80468	0.00609631	ALOX5	NM_000698	PROMOTER
chr12:046451279-046451338	A_17_P08334648	chr12	46451279	49.5417	1.39277	5.15262	0.00611374	FLJ20489	NM_017842	PROMOTER
chr9:072796484-072796543	A_17_P06734166	chr9	72796484	247.257	17.8084	3.79538	0.00611906	ALDH1A1	NM_000689	INSIDE
chr6:117109178-117109222	A_17_P05009336	chr6	117109178	27.0151	1.94336	3.79714	0.00612027	KPNA5	NM_002269	INSIDE
chr9:012683636-012683695	A_17_P06596334	chr9	12683636	39.1694	2.82108	3.79541	0.0061221	TYRP1	NM_000550	INSIDE
chr19:061603958-061604017	A_17_P11005861	chr19	61603958	13.8893	0.143996	6.59181	0.0061239	ZNF582-ZNF583	NM_144690-NM_152478	DIVERGENT_PROMOTER
chr10:026544767-026544817	A_17_P07139572	chr10	26544767	477.794	34.4772	3.79267	0.00612561	GAD2	NM_000818	PROMOTER
chr6:028028200-028028259	A_17_P15796603	chr6	28028200	126.999	9.16346	3.79278	0.00612577	OR2B6	NM_012367	PROMOTER
chr4:066365332-066365376	A_17_P03153313	chr4	66365332	490.875	35.4902	3.78986	0.00613255	EPHA5	NM_182472	PROMOTER
chr20:060810015-060810067	A_17_P11261934	chr20	60810015	310.553	8.93568	5.11912	0.00613298	NTSR1	NM_002531	PROMOTER
chr7:117110141-117110200	A_17_P05724914	chr7	117110141	56.3531	4.07253	3.7905	0.00613343	CTTNBP2	NM_033427	PROMOTER
chr7:026942556-026942614	A_17_P05377787	chr7	26942556	1118.68	80.9041	3.78945	0.00613357	HOXA4	NM_002141	INSIDE
chr3:170866867-170866926	A_17_P02757346	chr3	170866867	122.629	8.87225	3.78886	0.00613541	MDS1	NM_004991	PROMOTER
chr5:000905718-000905762	A_17_P15654427	chr5	905718	3644.8	263.833	3.78814	0.00613679	ZDHHC11	NM_024786	PROMOTER
chr4:111916289-111916333	A_17_P15601767	chr4	111916289	3446.49	250.362	3.78304	0.00614948	PITX2	NM_153427	PROMOTER
chr2:072287656-072287710	A_17_P01272101	chr2	72287656	328.027	23.8281	3.78308	0.00614954	CYP26B1	NM_019885	PROMOTER
chr9:133632958-133633002	A_17_P06995637	chr9	133632958	146.451	10.652	3.78122	0.0061544	SARDH	NM_007101	INSIDE
chr10:071556726-071556770	A_17_P07300801	chr10	71556726	19.2512	0.545422	5.14143	0.00615818	AMID	NM_032797	INSIDE
chr4:066365715-066365774	A_17_P03153318	chr4	66365715	106.408	7.75315	3.77868	0.00616108	EPHA5	NM_182472	PROMOTER
chr7:027011183-027011242	A_17_P05378341	chr7	27011183	1045.36	76.3102	3.77598	0.00616717	HOXA13	NM_000522	INSIDE
chr7:027014608-027014657	A_17_P05378363	chr7	27014608	4183.56	305.522	3.77538	0.00616866	HOXA13	NM_000522	PROMOTER
chr1:176933013-176933059	A_17_P00633110	chr1	176933013	7979.48	582.931	3.7749	0.00616988	LHX4	NM_033343	INSIDE
chr1:044545209-044545268	A_17_P00171619	chr1	44545209	452.859	33.1229	3.77316	0.00617428	C1orf164	NM_018150	INSIDE
chr11:108797917-108797961	A_17_P08020497	chr11	108797917	267.527	7.95433	5.0718	0.00617667	LOC399947	NM_207645	PROMOTER
chr8:075396974-075397033	A_17_P16106947	chr8	75396974	204.729	14.9856	3.77206	0.00617719	JPH1	NM_020647	PROMOTER
chr1:047407495-047407539	A_17_P00181206	chr1	47407495	747.464	54.7364	3.77143	0.00617863	TAL1	NM_003189	PROMOTER
chr17:045406235-045406279	A_17_P10356428	chr17	45406235	549.234	16.4042	5.06528	0.00618252	DLX4	NM_001934	INSIDE
chr1:003003985-003004040	A_17_P00007533	chr1	3003985	523.807	38.4111	3.76944	0.00618367	PRDM16	NM_022114	PROMOTER
chr8:108581923-108581982	A_17_P06368448	chr8	108581923	232.342	17.0525	3.7682	0.00618693	ANGPT1	NM_001146	PROMOTER
chr1:230656125-230656169	A_17_P00871983	chr1	230656125	153.075	11.2494	3.76633	0.00619176	SLC35F3	NM_173508	INSIDE
chr7:027013812-027013857	A_17_P05378356	chr7	27013812	2954.12	217.41	3.76423	0.00619686	HOXA13	NM_000522	PROMOTER
chr10:134452469-134452518	A_17_P07590643	chr10	134452469	567.55	17.15	5.04846	0.00619854	NKX6-2	NM_177400	PROMOTER
chr1:100713807-100713866	A_17_P00414698	chr1	100713807	140.422	10.3456	3.76269	0.00620111	GPR88	NM_022049	PROMOTER
chr1:003003752-003003805	A_17_P00007531	chr1	3003752	356.167	26.2517	3.76207	0.00620248	PRDM16	NM_022114	PROMOTER
chr6:074457735-074457780	A_17_P04819468	chr6	74457735	286.646	21.1428	3.76103	0.00620513	CD109	NM_133493	PROMOTER
chr1:162399258-162399302	A_17_P00569515	chr1	162399258	12.8178	0.936201	3.77518	0.00620673	ALDH9A1	NM_000696	INSIDE
chr5:039399631-039399690	A_17_P03886422	chr5	39399631	190.397	14.0496	3.76041	0.00620676	C9	NM_001737	INSIDE
chr1:162866635-162866680	A_17_P00571616	chr1	162866635	136.156	10.0473	3.76039	0.00620705	FAM78B	NM_001017961	INSIDE
chr10:045191225-045191277	A_17_P07198575	chr10	45191225	517.073	38.2151	3.75815	0.00621243	ALOX5	NM_000698	INSIDE
chr1:221923189-221923234	A_17_P15185860	chr1	221923189	34.2951	2.53681	3.75691	0.00622016	LBR	NM_002296	PROMOTER
chr1:211644324-211644368	A_17_P00791599	chr1	211644324	5796.21	429.382	3.75478	0.00622107	KCNK2	NM_014217	PROMOTER
chr9:123848471-123848530	A_17_P06954301	chr9	123848471	429.121	31.8162	3.75355	0.00622425	LHX2	NM_004789	PROMOTER
chr19:016291279-016291337	A_17_P10898181	chr19	16291279	421.504	12.9916	5.0199	0.00622631	KLF2	NM_016270	PROMOTER
chr4:057364659-057364705	A_17_P03114667	chr4	57364659	221.104	16.4176	3.75141	0.00622987	HOP	NM_139211	PROMOTER
chr9:114349775-114349827	A_17_P06912187	chr9	114349775	375.965	27.9281	3.75081	0.00623133	DFNB31	NM_015404	PROMOTER
chr6:132315215-132315274	A_17_P05081131	chr6	132315215	304.615	22.6384	3.75014	0.00623312	CTGF	NM_001901	PROMOTER
chr6:039189117-039189176	A_17_P04676397	chr6	39189117	12.8178	0.936201	3.77518	0.00623504	C6orf64	NM_018322	INSIDE
chr17:044227969-044228019	A_17_P10351269	chr17	44227969	1448.26	44.9504	5.00984	0.00623614	TTLL6	NM_173623	PROMOTER
chr6:118333570-118333628	A_17_P05014166	chr6	118333570	282.45	21.0179	3.74831	0.00623781	SLC35F1	NM_001029858	PROMOTER
chr6:126109998-126110057	A_17_P15859115	chr6	126109998	453.568	33.7634	3.74779	0.0062392	HEY2	NM_012259	PROMOTER
chr1:245117562-245117621	A_17_P00932495	chr1	245117562	326.47	24.3101	3.74732	0.00624037	OR2T11	NM_001001964	PROMOTER
chr7:026967276-026967332	A_17_P05377991	chr7	26967276	6635.02	494.145	3.74709	0.00624091	HOXA7	NM_006896	INSIDE
chr2:031719557-031719616	A_17_P01084516	chr2	31719557	303.1	22.5932	3.74583	0.00624427	SRD5A2	NM_000348	PROMOTER
chr9:074733400-074733459	A_17_P06743378	chr9	74733400	314.247	23.425	3.74578	0.00624439	TRPM6	NM_017662	PROMOTER
chr7:026976696-026976740	A_17_P05378068	chr7	26976696	2959.81	220.771	3.74488	0.00624665	HOXA9	NM_152739	INSIDE
chr3:139528968-139529012	A_17_P02615643	chr3	139528968	325.146	24.2568	3.74463	0.00624738	TXNDC6	NM_178130	INSIDE
chr2:162098218-162098273	A_17_P01623170	chr2	162098218	373.278	27.8479	3.74461	0.00624739	TBR1	NM_006593	INSIDE
chr19:012723479-012723531	A_17_P10887203	chr19	12723479	867.799	27.1932	4.99604	0.00624993	VMD2L1	NM_017682	PROMOTER
chr9:000695089-000695148	A_17_P06540973	chr9	695089	280.87	20.9705	3.74347	0.00625044	ANKRD15	NM_153186	PROMOTER
chr1:013656597-013656654	A_17_P00051936	chr1	13656597	917.942	68.5695	3.74276	0.00625217	PDPN	NM_001006624	PROMOTER
chr2:074317888-074317947	A_17_P01280085	chr2	74317888	25.8899	1.93125	3.74478	0.00625399	MOBK1B	NM_018221	PROMOTER
chr1:180119646-180119705	A_17_P00647260	chr1	180119646	199.129	14.8848	3.74179	0.00625491	NMNAT2	NM_015039	PROMOTER
chr6:166551131-166551177	A_17_P05240302	chr6	166551131	566.267	42.3881	3.73975	0.00626006	T	NM_003181	INSIDE
chr9:130566992-130567041	A_17_P06981663	chr9	130566992	2042.5	152.913	3.73955	0.00626055	PRDM12	NM_021619	PROMOTER
chr17:044012821-044012880	A_17_P10350129	chr17	44012821	429.089	13.5496	4.98495	0.00626123	hsa-mir-10a	hsa-mir-10a	PROMOTER
chr6:005954363-005954408	A_17_P04528607	chr6	5954363	233.275	17.4708	3.73901	0.00626209	NRN1	NM_016588	PROMOTER
chr1:194611571-194611621	A_17_P00711579	chr1	194611571	395.458	29.6315	3.73832	0.00626382	LHX9	NM_001014434	PROMOTER
chr6:010517830-010517889	A_17_P15784695	chr6	10517830	595.498	44.6249	3.73818	0.00626417	TFAP2A	NM_001032280	INSIDE
chr7:020603513-020603572	A_17_P05348496	chr7	20603513	420.805	31.5657	3.73673	0.00626799	SP8	NM_198956	PROMOTER
chr19:047037913-047037972	A_17_P17141524	chr19	47037913	320.333	10.1988	4.97311	0.00627334	LYPD4	NM_173506	INSIDE
chr9:136318552-136318596	A_17_P07007694	chr9	136318552	1767.46	132.824	3.7341	0.00627486	LHX3	NM_014564	INSIDE
chr1:044547998-044548050	A_17_P00171643	chr1	44547998	531.69	39.9829	3.73313	0.00627745	C1orf164	NM_018150	INSIDE
chr7:026931431-026931490	A_17_P05377683	chr7	26931431	717.125	53.939	3.73282	0.00627822	HOXA3	NM_153632	PROMOTER
chr20:052523674-052523733	A_17_P11222246	chr20	52523674	316.622	10.162	4.96151	0.00628528	DOK5	NM_177959	PROMOTER
chr1:142564363-142564417	A_17_P00495450	chr1	142564363	921.887	69.4706	3.73012	0.00628536	PDE4DIP	NM_022359	INSIDE
chr5:172596396-172596446	A_17_P04471777	chr5	172596396	1437.39	108.328	3.72997	0.00628574	NKX2-5	NM_004387	PROMOTER
chr6:027323157-027323211	A_17_P04627945	chr6	27323157	1450.89	109.351	3.72991	0.00628591	PRSS16	NM_005865	PROMOTER
chr2:073055318-073055362	A_17_P15255659	chr2	73055318	216.493	16.3227	3.72937	0.00628743	EMX1	NM_004097	PROMOTER
chr6:139658013-139658072	A_17_P05117161	chr6	139658013	95.3899	7.19154	3.72946	0.00628764	TXLNB	NM_153235	PROMOTER
chr19:059744511-059744565	A_17_P11000530	chr19	59744511	373.427	12.0264	4.95655	0.0062903	FLJ00060	NM_033206	INSIDE
chr3:055498167-055498211	A_17_P02255300	chr3	55498167	136.861	10.3298	3.72783	0.00629327	WNT5A	NM_003392	PROMOTER
chr8:070539862-070539921	A_17_P06196310	chr8	70539862	275.578	20.8108	3.72706	0.0062935	SULF1	NM_015170	PROMOTER
chr5:054319528-054319587	A_17_P03936788	chr5	54319528	237.158	17.9754	3.72175	0.0063077	ESM1	NM_007036	PROMOTER
chr12:004254783-004254842	A_17_P08165072	chr12	4254783	278.018	9.05968	4.93957	0.00630824	CCND2	NM_001759	INSIDE
chr5:110457410-110457469	A_17_P04189483	chr5	110457410	10.2682	0.730413	3.81332	0.00630937	WDR36	NM_139281	INSIDE
chr19:007494269-007494313	A_17_P10873069	chr19	7494269	199.346	6.50127	4.93841	0.00630983	MCOLN1	NM_020533	INSIDE
chr1:245011515-245011562	A_17_P00932273	chr1	245011515	147.815	11.2235	3.71921	0.00631466	OR2G6	NM_001013355	INSIDE
chr3:193926734-193926793	A_17_P02863936	chr3	193926734	315.353	23.9636	3.71805	0.00631753	FGF12	NM_004113	INSIDE
chr10:006281957-006282007	A_17_P07047039	chr10	6281957	189.025	14.3672	3.71773	0.00631862	PFKFB3	NM_004566	PROMOTER
chr10:006058681-006058730	A_17_P07046045	chr10	6058681	194.854	14.8111	3.71764	0.00631872	IL15RA	NM_002189	INSIDE
chr8:057283317-057283376	A_17_P06136493	chr8	57283317	220.9	16.7949	3.7173	0.00631962	PLAG1	NM_002655	INSIDE
chr16:001141642-001141701	A_17_P09885051	chr16	1141642	448.324	14.7438	4.92636	0.00632201	CACNA1H	NM_001005407	PROMOTER
chr6:046809179-046809225	A_17_P04713359	chr6	46809179	349.142	26.5809	3.71535	0.00632475	PLA2G7	NM_005084	INSIDE
chr14:085065282-085065341	A_17_P16723887	chr14	85065282	321.811	10.618	4.92163	0.00632728	FLRT2	NM_013231	PROMOTER
chr6:159562659-159562711	A_17_P15882205	chr6	159562659	639.837	48.8093	3.71247	0.00633244	FNDC1	NM_032532	INSIDE
chr7:116557654-116557702	A_17_P05722035	chr7	116557654	578.377	44.1243	3.71236	0.00633277	WNT2	NM_003391	PROMOTER
chr2:026829054-026829100	A_17_P01060557	chr2	26829054	359.616	27.4459	3.71179	0.00633432	KCNK3	NM_002246	INSIDE
chr7:099161783-099161827	A_17_P15994475	chr7	99161783	291.379	22.239	3.71173	0.00633452	TRIM4	NM_033017	INSIDE
chr7:154744231-154744275	A_17_P05887717	chr7	154744231	6516.26	498.062	3.70965	0.00634007	EN2	NM_001427	PROMOTER
chr1:153425455-153425499	A_17_P15133323	chr1	153425455	193.424	14.7862	3.70945	0.00634078	BCAN	NM_198427	INSIDE
chr9:122071724-122071783	A_17_P06946505	chr9	122071724	4257.85	325.536	3.70923	0.00634118	LHX6	NM_199160	PROMOTER
chr7:117109643-117109692	A_17_P05724909	chr7	117109643	242.158	18.5168	3.70904	0.00634181	CTTNBP2	NM_033427	PROMOTER
chr9:134760380-134760425	A_17_P06999965	chr9	134760380	218.936	16.7537	3.70796	0.0063448	COL5A1	NM_000093	INSIDE
chr2:162099673-162099732	A_17_P01623184	chr2	162099673	590.114	45.187	3.70701	0.00634722	TBR1	NM_006593	INSIDE
chr7:026959770-026959814	A_17_P05377924	chr7	26959770	3246.75	248.75	3.70623	0.00634933	HOXA6	NM_024014	INSIDE
chr2:073059091-073059142	A_17_P01275198	chr2	73059091	310.906	23.8287	3.7057	0.00635089	EMX1	NM_004097	INSIDE
chr9:122361907-122361966	A_17_P06947615	chr9	122361907	288.291	22.1443	3.70252	0.0063595	OR1J4	NM_001004452	DOWNSTREAM
chr1:149301336-149301386	A_17_P00512250	chr1	149301336	309.418	23.7834	3.70153	0.00636223	C1orf42	NM_019060	INSIDE
chr5:135198822-135198866	A_17_P15743385	chr5	135198822	403.927	31.0527	3.7013	0.00636285	LOC153328	NM_145282	INSIDE
chr1:156220929-156220988	A_17_P00540948	chr1	156220929	203.896	15.6918	3.69975	0.00636713	OR10J1	NM_012351	PROMOTER
chr7:020598900-020598959	A_17_P05348460	chr7	20598900	3218.8	247.796	3.6993	0.0063682	SP8	NM_182700	INSIDE
chr12:057598647-057598704	A_17_P08384214	chr12	57598647	219.503	7.44181	4.88244	0.00637017	LRIG3	NM_153377	INSIDE
chr2:228870385-228870434	A_17_P01945128	chr2	228870385	677.1	52.1588	3.69839	0.00637071	SKIP	NM_030623	INSIDE
chr2:119415916-119415973	A_17_P01432736	chr2	119415916	248.025	19.111	3.69801	0.00637181	MARCO	NM_006770	PROMOTER
chr6:100161900-100161951	A_17_P04931724	chr6	100161900	3191.64	246.002	3.69755	0.00637297	PRDM13	NM_021620	INSIDE
chr7:026915448-026915507	A_17_P15920051	chr7	26915448	468.271	36.1031	3.69715	0.00637414	HOXA2	NM_006735	INSIDE
chr5:174803508-174803552	A_17_P15765556	chr5	174803508	364.589	28.1399	3.69558	0.00637853	DRD1	NM_000794	INSIDE
chr6:078229183-078229227	A_17_P04834764	chr6	78229183	763.032	58.9045	3.69529	0.00637918	HTR1B	NM_000863	INSIDE
chr12:047652994-047653050	A_17_P08339975	chr12	47652994	423.485	14.4515	4.87302	0.00638017	WNT10B-WNT1	NM_003394-NM_005430	DIVERGENT_PROMOTER
chr9:093795397-093795444	A_17_P06825036	chr9	93795397	426.695	32.9509	3.69482	0.00638051	BARX1	NM_021570	INSIDE
chr9:132487002-132487061	A_17_P06990428	chr9	132487002	114.449	8.838	3.69484	0.00638081	BARHL1	NM_020064	PROMOTER
chr4:084813805-084813849	A_17_P03226675	chr4	84813805	265.775	20.5287	3.69449	0.0063815	MGC11324	NM_032717	PROMOTER
chr10:043080618-043080669	A_17_P16319429	chr10	43080618	595.83	46.0803	3.69268	0.00638639	RASGEF1A	NM_145313	INSIDE
chr10:131654780-131654838	A_17_P07576670	chr10	131654780	358.562	12.3054	4.86486	0.00638934	EBF3	NM_001005463	PROMOTER
chr1:044541050-044541094	A_17_P15055319	chr1	44541050	2412.51	186.72	3.69159	0.00638938	C1orf164	NM_018150	INSIDE
chr11:004347179-004347238	A_17_P16415209	chr11	4347179	260.242	8.934	4.8644	0.00639	OR52B4	NM_001005161	PROMOTER
chr8:069024419-069024478	A_17_P06189228	chr8	69024419	304.937	23.6458	3.68885	0.00639699	DEPDC2	NM_024870	PROMOTER
chr16:031446407-031446466	A_17_P09987046	chr16	31446407	610.725	21.1028	4.85502	0.00640036	ERAF	NM_016633	PROMOTER
chr7:026941040-026941092	A_17_P05377774	chr7	26941040	786.788	61.0721	3.68739	0.006401	HOXA3	NM_153631	PROMOTER
chr11:067534875-067534927	A_17_P07851916	chr11	67534875	23.2213	0.77515	4.90483	0.00640281	ALDH3B1	NM_000694	INSIDE
chr9:017570053-017570112	A_17_P06620431	chr9	17570053	70.4285	5.46654	3.68746	0.00640322	SH3GL2	NM_003026	INSIDE
chr6:127484434-127484480	A_17_P05056725	chr6	127484434	144.273	11.2079	3.68621	0.0064047	RSPO3	NM_032784	INSIDE
chr1:211646483-211646542	A_17_P00791611	chr1	211646483	283.011	21.992	3.68581	0.00640544	KCNK2	NM_001017425	INSIDE
chr17:044004474-044004532	A_17_P16993119	chr17	44004474	480.48	16.6682	4.8493	0.00640686	HOXB3	NM_002146	INSIDE
chr7:026915216-026915271	A_17_P05377572	chr7	26915216	2543.56	197.757	3.68505	0.00640747	HOXA2	NM_006735	INSIDE
chr4:078176745-078176789	A_17_P03196701	chr4	78176745	503.372	39.137	3.68502	0.00640757	LOC345079	NM_001029870	PROMOTER
chr17:025586245-025586289	A_17_P16967287	chr17	25586245	1157.85	40.3034	4.84441	0.00641241	SLC6A4	NM_001045	INSIDE
chr6:101023661-101023711	A_17_P04935968	chr6	101023661	207.167	16.1283	3.68313	0.00641293	SIM1	NM_005068	PROMOTER
chr5:031227766-031227825	A_17_P03851269	chr5	31227766	163.805	12.7682	3.68134	0.00641798	CDH6	NM_004932	PROMOTER
chr7:027012238-027012282	A_17_P05378349	chr7	27012238	633.225	49.3639	3.68119	0.00641825	HOXA13	NM_000522	INSIDE
chr7:027054031-027054082	A_17_P05378623	chr7	27054031	1630.38	127.13	3.68083	0.00641924	EVX1	NM_001989	PROMOTER
chr7:141457991-141458050	A_17_P05835683	chr7	141457991	271.136	21.1443	3.68068	0.00641974	BC070387	NONE	Unknown
chr7:027001939-027001983	A_17_P05378260	chr7	27001939	419.25	32.7204	3.67955	0.00642284	HOXA11	NM_005523	PROMOTER
chr4:166312713-166312772	A_17_P03591334	chr4	166312713	393.663	30.7344	3.67903	0.00642427	TRIM60	NM_152620	INSIDE
chr2:237261282-237261341	A_17_P01983135	chr2	237261282	323.223	25.2457	3.67842	0.00642603	CMKOR1	NM_020311	INSIDE
chr2:222983237-222983285	A_17_P01916984	chr2	222983237	4687.34	366.457	3.67705	0.00642978	PAX3	NM_181461	INSIDE
chr5:127898918-127898977	A_17_P15739117	chr5	127898918	541.523	42.3412	3.67689	0.00643028	FBN2	NM_001999	INSIDE
chr4:076215712-076215764	A_17_P03188655	chr4	76215712	645.309	50.4688	3.67653	0.00643128	DKFZP564O0823	NM_015393	INSIDE
chr12:052636395-052636439	A_17_P16560287	chr12	52636395	1933.53	68.0951	4.82754	0.00643182	HOXC12	NM_173860	INSIDE
chr6:126110447-126110495	A_17_P05050111	chr6	126110447	199.051	15.599	3.67362	0.00643982	HEY2	NM_012259	PROMOTER
chr5:037872402-037872446	A_17_P03878897	chr5	37872402	597.726	46.8655	3.67288	0.00644151	GDNF	NM_199231	PROMOTER
chr4:020378263-020378307	A_17_P02968026	chr4	20378263	27.792	2.17689	3.67433	0.00644379	MGC29898	NM_145048	PROMOTER
chr4:111904115-111904174	A_17_P03347194	chr4	111904115	481.936	37.8163	3.67176	0.00644469	PITX2	NM_000325	PROMOTER
chr7:026976854-026976904	A_17_P05378070	chr7	26976854	4668.73	366.41	3.6715	0.00644541	HOXA9	NM_152739	INSIDE
chr12:052661305-052661358	A_17_P08362256	chr12	52661305	398.534	14.1519	4.81564	0.00644584	HOXC10	NM_017409	PROMOTER
chr7:020601141-020601200	A_17_P05348474	chr7	20601141	1542.21	121.115	3.67055	0.00644809	SP8	NM_198956	PROMOTER
chr8:057518842-057518901	A_17_P06137313	chr8	57518842	119.61	9.40554	3.66869	0.00645367	PENK	NM_006211	INSIDE
chr3:152660940-152660999	A_17_P02676170	chr3	152660940	388.491	30.5721	3.66759	0.00645649	IGSF10	NM_178822	PROMOTER
chr13:111766114-111766173	A_17_P09141978	chr13	111766114	317.42	11.3981	4.79952	0.00646498	SOX1	NM_005986	PROMOTER
chr20:020293986-020294030	A_17_P11104476	chr20	20293986	371.534	13.3575	4.79777	0.00646706	INSM1	NM_002196	PROMOTER
chr1:090893227-090893286	A_17_P00371048	chr1	90893227	209.762	16.5521	3.66367	0.00646771	BARHL2	NM_020063	INSIDE
chr4:025333819-025333876	A_17_P15553594	chr4	25333819	238.76	18.8474	3.66312	0.00646929	SLC34A2	NM_006424	INSIDE
chr6:033021124-033021183	A_17_P04649017	chr6	33021124	306.118	24.1851	3.66189	0.00647271	HLA-DMB	NM_002118	PROMOTER
chr16:025609711-025609755	A_17_P16870623	chr16	25609711	315.007	11.3712	4.79193	0.00647403	HS3ST4	NM_006040	PROMOTER
chrX:136375288-136375333	A_17_P11980039	chrX	136375288	621.139	22.4386	4.79086	0.00647512	ZIC3	NM_003413	INSIDE
chr6:150438128-150438172	A_17_P05165908	chr6	150438128	4521.71	357.717	3.65998	0.0064781	RAET1L	NM_130900	INSIDE
chr6:123143269-123143327	A_17_P05035243	chr6	123143269	149.152	11.8	3.65993	0.00647848	FABP7	NM_001446	INSIDE
chr8:006900831-006900887	A_17_P05941539	chr8	6900831	149.152	11.8	3.65993	0.00647872	DEFA5	NM_021010	INSIDE
chr4:004974678-004974737	A_17_P02902282	chr4	4974678	861.644	68.1859	3.65955	0.00647935	MSX1	NM_002448	PROMOTER
chr3:188564224-188564283	A_17_P02838240	chr3	188564224	190.598	15.0854	3.6593	0.00648025	IFRG28	NM_022147	PROMOTER
chr2:200146275-200146319	A_17_P01805947	chr2	200146275	196.27	15.5449	3.65833	0.00648301	SATB2	NM_015265	INSIDE
chr18:017075291-017075350	A_17_P10561760	chr18	17075291	202.872	7.38643	4.77955	0.00648938	KIAA1772	NM_024935	PROMOTER
chr21:033316594-033316653	A_17_P11357239	chr21	33316594	972.967	35.467	4.77784	0.00649078	OLIG2	NM_005806	PROMOTER
chr8:072917336-072917380	A_17_P06207684	chr8	72917336	5105.05	405.11	3.65554	0.0064908	MSC	NM_005098	INSIDE
chr12:005474695-005474754	A_17_P08171448	chr12	5474695	382.673	13.9545	4.77731	0.00649156	NTF3	NM_002527	INSIDE
chr2:237260271-237260323	A_17_P01983128	chr2	237260271	303.636	24.107	3.65482	0.00649298	CMKOR1	NM_020311	PROMOTER
chr1:158429325-158429384	A_17_P00550519	chr1	158429325	129.713	10.2977	3.65492	0.00649303	FCRLM2	NM_001002901	INSIDE
chr8:053639057-053639104	A_17_P06121799	chr8	53639057	336.565	26.7259	3.65457	0.00649367	UNQ9433	NM_207413	INSIDE
chr16:001145746-001145790	A_17_P09885063	chr16	1145746	636.448	23.2384	4.77546	0.0064937	CACNA1H	NM_001005407	INSIDE
chr5:001352994-001353044	A_17_P03713278	chr5	1352994	718.243	57.1019	3.65286	0.00649853	TERT	NM_198255	PROMOTER
SM_09	SM_09	NONE	NONE	15.564	0.530069	4.87589	0.00650297	SM_09	NONE	NONE
chr12:056141256-056141301	A_17_P16563264	chr12	56141256	708.858	26.0532	4.76597	0.00650528	GLI1	NM_005269	INSIDE
chr8:140782566-140782612	A_17_P16140700	chr8	140782566	539.736	42.9812	3.65047	0.00650542	KCNK9	NM_016601	INSIDE
chr6:006265336-006265380	A_17_P04529932	chr6	6265336	1435.34	114.319	3.65025	0.00650605	F13A1	NM_000129	INSIDE
chr12:052672428-052672476	A_17_P08362359	chr12	52672428	1216.14	44.7285	4.76497	0.00650647	HOXC9	NM_006897	PROMOTER
chr7:149870567-149870614	A_17_P05868492	chr7	149870567	291.367	23.2181	3.64952	0.00650828	GIMAP5	NM_018384	PROMOTER
chr4:024706644-024706703	A_17_P02988780	chr4	24706644	729.881	58.2229	3.648	0.00651256	LGI2	NM_018176	INSIDE
chr5:076974002-076974061	A_17_P04032693	chr5	76974002	828.885	66.1793	3.64672	0.00651627	OTP	NM_032109	PROMOTER
chr4:167153792-167153837	A_17_P15635432	chr4	167153792	565.224	45.1502	3.64602	0.00651835	TLL1	NM_012464	INSIDE
chr3:153014564-153014623	A_17_P02677407	chr3	153014564	260.79	20.8357	3.64576	0.00651916	AADAC	NM_001086	INSIDE
chr7:020598713-020598757	A_17_P05348459	chr7	20598713	2609.28	208.481	3.64566	0.00651934	SP8	NM_182700	INSIDE
chr2:155382031-155382090	A_17_P01591233	chr2	155382031	79.103	6.32088	3.64554	0.00652082	KCNJ3	NM_002239	INSIDE
chr6:123153870-123153929	A_17_P05035307	chr6	123153870	479.498	38.3923	3.64264	0.00652817	SMPDL3A	NM_006714	INSIDE
chr7:026998717-026998767	A_17_P05378232	chr7	26998717	3110.1	249.042	3.6425	0.00652852	HOXA11	NM_005523	PROMOTER
chr14:057687420-057687479	A_17_P09319720	chr14	57687420	370.77	13.8091	4.74683	0.00652908	C14orf37	NM_001001872	INSIDE
chr7:038448009-038448068	A_17_P05430157	chr7	38448009	177.096	14.183	3.6423	0.0065294	AMPH	NM_139316	PROMOTER
chr2:237261753-237261812	A_17_P01983139	chr2	237261753	268.856	21.5431	3.64154	0.00653143	CMKOR1	NM_020311	INSIDE
chr12:056444986-056445030	A_17_P08379065	chr12	56444986	245.929	9.1734	4.74464	0.00653207	CYP27B1	NM_000785	INSIDE
chr11:117632184-117632243	A_17_P08062949	chr11	117632184	245.929	9.1734	4.74464	0.00653242	EVA1	NM_005797	INSIDE
chr11:032419012-032419071	A_17_P07734905	chr11	32419012	188.866	7.05525	4.74252	0.0065347	WIT1	NM_015855	DOWNSTREAM
chr10:028609944-028610003	A_17_P07147525	chr10	28609944	211.546	16.975	3.63949	0.00653749	MPP7	NM_173496	INSIDE
chr1:114410072-114410116	A_17_P15101509	chr1	114410072	5817.2	466.847	3.6393	0.00653786	SYT6	NM_205848	PROMOTER
chr5:001934839-001934883	A_17_P15657053	chr5	1934839	353.108	28.3426	3.63907	0.00653862	IRX4	NM_016358	INSIDE
chr11:126375103-126375162	A_17_P08104203	chr11	126375103	366.442	13.7539	4.73567	0.00654302	KIRREL3	NM_032531	INSIDE
chr7:026917455-026917514	A_17_P15920061	chr7	26917455	3064.63	246.33	3.63705	0.00654446	HOXA2	NM_006735	PROMOTER
chr4:111904000-111904059	A_17_P03347193	chr4	111904000	363.488	29.2211	3.63683	0.00654517	PITX2	NM_000325	PROMOTER
chr1:006175081-006175131	A_17_P00022828	chr1	6175081	138.97	11.1822	3.63549	0.00654974	CHD5	NM_015557	PROMOTER
chr10:119292215-119292274	A_17_P07511942	chr10	119292215	150.765	5.67606	4.73127	0.00654979	EMX2	NM_004098	INSIDE
chr17:076581151-076581205	A_17_P10491101	chr17	76581151	9.78956	0.306449	4.99753	0.0065521	CHMP6	NM_024591	INSIDE
chr7:026933728-026933775	A_17_P05377706	chr7	26933728	328.644	26.4648	3.63438	0.00655237	HOXA3	NM_030661	PROMOTER
chr7:020598594-020598638	A_17_P05348458	chr7	20598594	1569.5	126.495	3.63315	0.00655593	SP8	NM_182700	INSIDE
chr8:140783530-140783574	A_17_P06515580	chr8	140783530	106.122	8.55146	3.63341	0.00655597	KCNK9	NM_016601	INSIDE
chr4:011105010-011105069	A_17_P02927622	chr4	11105010	170.711	13.766	3.63237	0.00655844	HS3ST1	NM_005114	INSIDE
chrX:070071058-070071104	A_17_P11782616	chrX	70071058	264.9	10.0434	4.72112	0.00656148	SNX12	NM_013346	INSIDE
chr7:027002515-027002564	A_17_P05378264	chr7	27002515	1984.41	160.2	3.63076	0.00656295	HOXA11	NM_005523	PROMOTER
chr4:187851481-187851525	A_17_P03693122	chr4	187851481	284.741	23.0051	3.62962	0.0065665	MTNR1A	NM_005958	INSIDE
chr2:176780888-176780947	A_17_P01695052	chr2	176780888	102.447	8.27742	3.62956	0.00656706	HOXD13	NM_000523	PROMOTER
chr1:165429653-165429700	A_17_P00582895	chr1	165429653	17.2881	1.38824	3.63846	0.00656836	DPT	NM_001937	INSIDE
chr2:227855189-227855233	A_17_P15389380	chr2	227855189	348.564	28.1956	3.62788	0.00657153	COL4A3	NM_000091	INSIDE
chr19:009074284-009074343	A_17_P10877924	chr19	9074284	570.644	21.7736	4.71194	0.00657309	OR7G2	NM_001005193	INSIDE
chr2:176782350-176782397	A_17_P01695067	chr2	176782350	581.464	47.0924	3.62612	0.0065767	HOXD13	NM_000523	PROMOTER
chr2:172776936-172776988	A_17_P01675447	chr2	172776936	1905.15	154.383	3.62532	0.00657908	DLX1	NM_001038493	INSIDE
chr17:010393037-010393096	A_17_P10227058	chr17	10393037	260.124	9.99908	4.70126	0.00658702	MYH2	NM_017534	INSIDE
chr11:032412091-032412136	A_17_P07734859	chr11	32412091	611.23	23.523	4.69957	0.00658906	WT1	NM_000378	INSIDE
chr2:222994212-222994256	A_17_P01917068	chr2	222994212	4155.24	337.692	3.62115	0.00659148	PAX3	NM_013942	PROMOTER
chr2:113756131-113756182	A_17_P01409518	chr2	113756131	368.272	29.9398	3.62064	0.0065931	PAX8	NM_013992	PROMOTER
chr12:061831268-061831317	A_17_P08402465	chr12	61831268	285.578	11.0303	4.69434	0.00659608	AVPR1A	NM_000706	INSIDE
chrX:128701455-128701508	A_17_P11949055	chrX	128701455	387.33	14.964	4.694	0.00659639	ZDHHC9	NM_001008222	INSIDE
chr16:003341830-003341889	A_17_P09893751	chr16	3341830	235.465	9.10539	4.69265	0.00659844	OR2C1	NM_012368	PROMOTER
chr1:087511396-087511455	A_17_P00355724	chr1	87511396	390.674	31.8066	3.61857	0.00659926	LMO4	NM_006769	INSIDE
chr8:065455222-065455269	A_17_P06173960	chr8	65455222	189.223	15.4104	3.61811	0.00660088	hsa-mir-124a-2	hsa-mir-124a-2	DOWNSTREAM
chr13:024642428-024642472	A_17_P08727946	chr13	24642428	466.772	18.0838	4.68995	0.00660165	FLJ25477	NM_152704	INSIDE
chr5:052810871-052810923	A_17_P03929842	chr5	52810871	414.507	33.7775	3.61726	0.00660321	FST	NM_006350	PROMOTER
chr6:108593268-108593312	A_17_P04970866	chr6	108593268	213.373	17.3968	3.61649	0.0066056	NR2E1	NM_003269	PROMOTER
chr5:024681739-024681798	A_17_P03823547	chr5	24681739	87.9185	7.16573	3.61698	0.0066058	CDH10	NM_006727	PROMOTER
chr3:131175048-131175092	A_17_P15488532	chr3	131175048	45.4277	3.69818	3.61868	0.00660786	TRH	NM_007117	PROMOTER
chr1:038186148-038186192	A_17_P00145844	chr1	38186148	227.311	18.5429	3.61573	0.00660787	POU3F1	NM_002699	PROMOTER
chr2:222993925-222993969	A_17_P01917065	chr2	222993925	7415.28	605.136	3.61517	0.0066094	PAX3	NM_013942	PROMOTER
chr4:164751949-164751993	A_17_P03584527	chr4	164751949	168.319	13.7388	3.61488	0.00661053	TKTL2	NM_032136	INSIDE
chr2:113597512-113597571	A_17_P01408633	chr2	113597512	270.296	22.0638	3.61478	0.00661066	IL1RN	NM_173842	PROMOTER
chr6:007488754-007488813	A_17_P04535913	chr6	7488754	140.547	11.4731	3.61473	0.00661117	DSP	NM_001008844	INSIDE
chr2:102693422-102693481	A_17_P01368471	chr2	102693422	59.5877	4.86677	3.61398	0.00661559	SLC9A2	NM_003048	PROMOTER
chr7:015499945-015500004	A_17_P05323184	chr7	15499945	800.793	65.4564	3.61282	0.0066165	MEOX2	NM_005924	PROMOTER
chr6:031479083-031479128	A_17_P04643293	chr6	31479083	2775.21	226.859	3.61273	0.00661674	MICA	NM_000247	PROMOTER
chr3:187027193-187027242	A_17_P02831538	chr3	187027193	3719.42	304.288	3.61157	0.00662024	IMP-2	NM_006548	PROMOTER
chr5:180097874-180097933	A_17_P04498827	chr5	180097874	320.087	26.1882	3.61148	0.00662057	OR2Y1	NM_001001657	DOWNSTREAM
chr2:237260753-237260800	A_17_P01983132	chr2	237260753	250.404	20.5049	3.61022	0.00662443	CMKOR1	NM_020311	INSIDE
chr6:150558514-150558573	A_17_P05166331	chr6	150558514	410.786	33.6563	3.60944	0.00662671	PPP1R14C	NM_030949	INSIDE
chr7:099028871-099028930	A_17_P05645119	chr7	99028871	163.138	13.3659	3.60946	0.00662683	CYP3A4	NM_017460	PROMOTER
chr5:161428294-161428350	A_17_P04418652	chr5	161428294	340.785	27.9414	3.60838	0.00662992	GABRG2	NM_000816	INSIDE
chr4:110579205-110579264	A_17_P03341678	chr4	110579205	241.282	19.786	3.60817	0.00663062	COL25A1	NM_032518	INSIDE
chr2:102230994-102231053	A_17_P01366248	chr2	102230994	241.282	19.786	3.60817	0.00663064	IL1R1	NM_000877	INSIDE
chr3:141137072-141137116	A_17_P02622183	chr3	141137072	147.203	12.0751	3.6077	0.00663228	CLSTN2	NM_022131	INSIDE
chr17:044428146-044428190	A_17_P10352038	chr17	44428146	276.817	10.9242	4.66334	0.00663704	IMP-1	NM_006546	PROMOTER
chr6:126111843-126111902	A_17_P05050119	chr6	126111843	240.709	19.7687	3.606	0.00663734	HEY2	NM_012259	PROMOTER
chrX:152615744-152615793	A_17_P12035243	chrX	152615744	229.492	9.06351	4.66223	0.00663901	PDZD4	NM_032512	INSIDE
chr1:203067809-203067868	A_17_P00751096	chr1	203067809	128.635	10.5726	3.60488	0.006641	C1orf147-RASSF5	NM_001025592-NM_031437	DIVERGENT_PROMOTER
chr9:021296775-021296834	A_17_P06637993	chr9	21296775	110.633	9.09543	3.60449	0.00664231	IFNA5	NM_002169	PROMOTER
chr6:010523155-010523211	A_17_P04550255	chr6	10523155	681.146	56.0394	3.60345	0.00664487	TFAP2A	NM_001032280	PROMOTER
chr9:122369493-122369552	A_17_P06947673	chr9	122369493	143.027	11.767	3.60346	0.00664513	OR1N1	NM_012363	PROMOTER
chr1:245082966-245083025	A_17_P00932339	chr1	245082966	204.302	16.8097	3.60334	0.00664533	OR2T10	NM_001004693	INSIDE
chr5:160905971-160906030	A_17_P04416254	chr5	160905971	286.064	23.5385	3.60324	0.00664557	GABRB2	NM_000813	INSIDE
chr5:054562380-054562428	A_17_P03937895	chr5	54562380	2001.04	164.659	3.6032	0.00664561	UNG2	NM_001024592	DOWNSTREAM
chr7:149873825-149873884	A_17_P05868519	chr7	149873825	231.802	19.0788	3.60285	0.00664686	GIMAP5	NM_018384	INSIDE
chr8:065450467-065450526	A_17_P06173911	chr8	65450467	295.895	24.36	3.6025	0.00664785	hsa-mir-124a-2	hsa-mir-124a-2	PROMOTER
chr1:167362156-167362201	A_17_P00591363	chr1	167362156	1219.92	100.498	3.60155	0.00665066	PRRX1	NM_006902	PROMOTER
chr1:047611006-047611053	A_17_P00181980	chr1	47611006	2950.28	243.331	3.59986	0.0066558	FOXD2	NM_004474	PROMOTER
chr12:004889279-004889323	A_17_P08167962	chr12	4889279	602.518	24.0142	4.64904	0.00665621	KCNA1	NM_000217	PROMOTER
chr4:000982276-000982320	A_17_P02888004	chr4	982276	2249.75	185.727	3.59851	0.00665994	SLC26A1	NM_213613	PROMOTER
chr7:026965017-026965061	A_17_P05377971	chr7	26965017	5435.83	448.811	3.59832	0.00666052	HOXA6	NM_024014	PROMOTER
chr9:001039905-001039963	A_17_P06542663	chr9	1039905	1324.96	109.447	3.59765	0.00666258	DMRT2	NM_006557	PROMOTER
chr8:068819603-068819655	A_17_P06188303	chr8	68819603	314.814	26.0154	3.59706	0.00666445	CPA6	NM_020361	INSIDE
chr6:056218202-056218261	A_17_P15819311	chr6	56218202	165.923	13.7111	3.5971	0.00666477	COL21A1	NM_030820	INSIDE
chr6:031187870-031187914	A_17_P04642451	chr6	31187870	404.554	33.4517	3.59618	0.00666712	C6orf15	NM_014070	INSIDE
chr14:036199239-036199298	A_17_P09227800	chr14	36199239	402.65	16.1456	4.64032	0.00666815	PAX9	NM_006194	PROMOTER
chr4:113793184-113793236	A_17_P03356407	chr4	113793184	149.596	12.3767	3.59538	0.00666997	NEUROG2	NM_024019	INSIDE
chr19:048549634-048549690	A_17_P10968991	chr19	48549634	330.981	13.2938	4.63792	0.0066715	CD177	NM_020406	PROMOTER
chr14:024591146-024591205	A_17_P09174981	chr14	24591146	224.883	9.0358	4.63738	0.0066725	STXBP6	NM_014178	PROMOTER
chr3:099551959-099552018	A_17_P02439136	chr3	99551959	116.717	9.66867	3.59356	0.0066757	OR5K4	NM_001005517	PROMOTER
chr6:046809630-046809678	A_17_P04713364	chr6	46809630	402.885	33.3966	3.5926	0.00667815	PLA2G7	NM_005084	INSIDE
chr6:029902859-029902918	A_17_P04637893	chr6	29902859	402.05	33.369	3.5908	0.00668371	HLA-G	NM_002127	PROMOTER
chr9:136318810-136318861	A_17_P07007695	chr9	136318810	2707.15	224.688	3.59078	0.00668373	LHX3	NM_014564	INSIDE
chr5:052814091-052814150	A_17_P03929863	chr5	52814091	333.86	27.7122	3.59065	0.00668418	FST	NM_006350	INSIDE
chr16:031447443-031447487	A_17_P09987057	chr16	31447443	477.861	19.3361	4.62722	0.00668618	ERAF	NM_016633	INSIDE
chr12:113313820-113313879	A_17_P08627402	chr12	113313820	680.783	27.6299	4.62289	0.00669215	TBX5	NM_080717	PROMOTER
chr8:043265866-043265920	A_17_P06098013	chr8	43265866	515.979	42.9117	3.58787	0.00669285	POTE8	NM_001002920	PROMOTER
chr2:119326810-119326861	A_17_P01432382	chr2	119326810	290.899	24.1939	3.5878	0.00669304	EN1	NM_001426	PROMOTER
chr2:027441229-027441273	A_17_P01063470	chr2	27441229	450.087	37.4394	3.58758	0.00669368	TRIM54	NM_032546	INSIDE
chr4:156018126-156018183	A_17_P03544527	chr4	156018126	148.729	12.3715	3.5876	0.00669396	LRAT	NM_004744	PROMOTER
chr3:050286916-050286964	A_17_P02230664	chr3	50286916	290.397	24.1772	3.58631	0.0066977	SEMA3B	NM_001005914	INSIDE
chr1:157803405-157803452	A_17_P00548077	chr1	157803405	626.492	52.1634	3.58619	0.00669798	F11R	NM_016946	INSIDE
chr6:130727757-130727816	A_17_P05073518	chr6	130727757	332.004	27.6502	3.58584	0.00669909	BC044246	NONE	Unknown
chr11:006911222-006911281	A_17_P07621158	chr11	6911222	194.164	7.95333	4.60957	0.00671145	ZNF215	NM_013250	INSIDE
chr20:061276761-061276809	A_17_P11264373	chr20	61276761	893.902	36.7137	4.60573	0.00671617	hsa-mir-124a-3	hsa-mir-124a-3	PROMOTER
chr18:072331266-072331325	A_17_P10830683	chr18	72331266	336.161	13.8126	4.6051	0.00671732	FLJ44313	NM_207460	PROMOTER
chr8:055531281-055531340	A_17_P06128618	chr8	55531281	147.863	12.3662	3.57978	0.00671823	SOX17	NM_022454	PROMOTER
chr3:185460200-185460244	A_17_P02824875	chr3	185460200	167.91	14.0477	3.57928	0.00671972	CAMK2N2	NM_033259	INSIDE
chr5:127902529-127902573	A_17_P04270679	chr5	127902529	2172.59	181.855	3.57855	0.00672175	FBN2	NM_001999	PROMOTER
chr11:007773909-007773968	A_17_P07625038	chr11	7773909	46.2913	1.901	4.60591	0.00672622	OR5P2	NM_153444	DOWNSTREAM
chr6:170520158-170520217	A_17_P05257608	chr6	170520158	973.948	81.6091	3.57704	0.00672651	DLL1	NM_005618	PROMOTER
chr16:030326185-030326229	A_17_P09983398	chr16	30326185	18.6065	0.752425	4.62812	0.00672899	LOC51333	NM_016643	PROMOTER
chr8:100024262-100024321	A_17_P06328528	chr8	100024262	328.279	27.5253	3.57609	0.0067296	OSR2	NM_053001	PROMOTER
chr17:045398069-045398113	A_17_P10356373	chr17	45398069	1866.36	77.2231	4.59505	0.00673133	DLX4	NM_138281	PROMOTER
chr7:015497822-015497866	A_17_P05323164	chr7	15497822	394.535	33.1149	3.5746	0.0067342	MEOX2	NM_005924	INSIDE
chr18:013879356-013879415	A_17_P10559585	chr18	13879356	285.695	11.8378	4.59301	0.00673451	MC2R	NM_000529	INSIDE
chr16:082393569-082393619	A_17_P10158089	chr16	82393569	380.679	15.8349	4.5874	0.00674239	HSBP1	NM_001537	PROMOTER
chr6:152222089-152222148	A_17_P05174019	chr6	152222089	118.316	9.95639	3.57088	0.00674631	ESR1	NM_000125	INSIDE
chr6:133605500-133605547	A_17_P05087807	chr6	133605500	158.169	13.3212	3.56967	0.00674999	EYA4	NM_004100	INSIDE
chr6:133009975-133010034	A_17_P05084726	chr6	133009975	57.6681	4.85537	3.57012	0.0067514	TAAR1	NM_138327	PROMOTER
chr6:169472248-169472292	A_17_P05253306	chr6	169472248	392.009	33.0299	3.56904	0.00675174	THBS2	NM_003247	PROMOTER
chr4:110714281-110714340	A_17_P15600892	chr4	110714281	22.4694	1.89146	3.57039	0.00675471	SEC24B	NM_006323	INSIDE
chr16:001213225-001213269	A_17_P09885407	chr16	1213225	413.397	17.303	4.57843	0.00675533	TPSG1	NM_012467	INSIDE
chr4:085774548-085774607	A_17_P03231405	chr4	85774548	314.023	26.51	3.56626	0.00676071	NKX6-1	NM_006168	INSIDE
chr6:168659200-168659254	A_17_P05249066	chr6	168659200	216.137	18.2523	3.56579	0.00676239	SMOC2	NM_022138	PROMOTER
chr7:015499119-015499172	A_17_P05323175	chr7	15499119	3670.02	310.082	3.56507	0.00676433	MEOX2	NM_005924	INSIDE
chr4:110041971-110042024	A_17_P03338472	chr4	110041971	502.455	42.465	3.56465	0.00676569	AGXT2L1	NM_031279	PROMOTER
chr21:040161762-040161819	A_17_P11390562	chr21	40161762	266.105	11.193	4.57133	0.00676582	PCP4	NM_006198	INSIDE
chrX:073422858-073422910	A_17_P11790445	chrX	73422858	308.135	12.9813	4.56906	0.00676928	SLC16A2	NM_006517	PROMOTER
chr19:009980899-009980945	A_17_P10880019	chr19	9980899	278.866	11.7529	4.56848	0.00676997	COL5A3	NM_015719	INSIDE
chr6:010528302-010528358	A_17_P04550277	chr6	10528302	2230.85	188.995	3.56117	0.00677676	TFAP2A	NM_003220	PROMOTER
chr7:026985685-026985729	A_17_P05378144	chr7	26985685	567.257	48.0876	3.56027	0.00677967	HOXA10	NM_018951	INSIDE
chr4:078880696-078880755	A_17_P15584079	chr4	78880696	87.7419	7.43658	3.56055	0.00677986	CXCL13	NM_006419	INSIDE
chr7:031884807-031884866	A_17_P05402835	chr7	31884807	214.873	18.2201	3.55988	0.00678104	PDE1C	NM_005020	PROMOTER
chr7:156306311-156306361	A_17_P05895735	chr7	156306311	5597.12	474.648	3.55975	0.00678129	HLXB9	NM_005515	PROMOTER
chr17:044007712-044007771	A_17_P10350090	chr17	44007712	352.821	14.9601	4.55974	0.00678278	HOXB3	NM_002146	PROMOTER
chr2:113751018-113751063	A_17_P01409480	chr2	113751018	2227.01	188.97	3.55888	0.0067841	PAX8	NM_003466	INSIDE
chr11:117588341-117588395	A_17_P08062718	chr11	117588341	504.092	21.3979	4.55815	0.00678497	AMICA1	NM_153206	INSIDE
LACC:Intensity304	LACC:Intensity304	NONE	NONE	169.691	14.4026	3.55851	0.00678553	LACC:Intensity304	NONE	NONE
chr17:010041337-010041396	A_17_P10225460	chr17	10041337	210.855	8.95401	4.55757	0.0067864	GAS7	NM_201433	INSIDE
chr1:150134677-150134727	A_17_P00515764	chr1	150134677	4607.03	391.258	3.55765	0.00678805	PGLYRP4-S100A9	NM_020393-NM_002965	DIVERGENT_PROMOTER
chr17:044052065-044052113	A_17_P10350448	chr17	44052065	703.311	29.9014	4.55588	0.00678826	HOXB8	NM_024016	PROMOTER
chr11:017696954-017697005	A_17_P07669008	chr11	17696954	440.195	18.7553	4.55277	0.006793	MYOD1	NM_002478	PROMOTER
chr5:027075192-027075251	A_17_P03833486	chr5	27075192	156.509	13.306	3.5561	0.00679325	CDH9	NM_016279	PROMOTER
chr2:073058457-073058516	A_17_P01275194	chr2	73058457	605.844	51.5108	3.556	0.00679339	EMX1	NM_004097	INSIDE
LACC:GD5C_8_r	LACC:GD5C_8_r	NONE	NONE	60.3901	2.56665	4.55635	0.00679392	LACC:GD5C_8_r	NONE	NONE
chr2:172777821-172777880	A_17_P01675452	chr2	172777821	2063.25	175.626	3.55434	0.00679868	DLX1	NM_001038493	INSIDE
chr6:049814961-049815020	A_17_P04726496	chr6	49814961	319.896	27.2339	3.55413	0.00679942	CRISP3	NM_006061	PROMOTER
chr14:036121709-036121760	A_17_P09227352	chr14	36121709	437.359	18.7123	4.54676	0.00680188	NKX2-8	NM_014360	PROMOTER
chrX:107489738-107489791	A_17_P11876911	chrX	107489738	286.329	12.2586	4.54581	0.00680362	COL4A5	NM_000495	INSIDE
chr3:187027073-187027119	A_17_P02831537	chr3	187027073	4132.05	352.54	3.551	0.00680946	IMP-2	NM_006548	PROMOTER
chr1:219938272-219938323	A_17_P00826746	chr1	219938272	1026.76	87.6699	3.54987	0.00681311	C1orf65	NM_152610	PROMOTER
chr6:142665949-142666008	A_17_P05129433	chr6	142665949	361.085	30.8349	3.5497	0.00681371	GPR126	NM_001032394	INSIDE
chr1:047409361-047409405	A_17_P00181218	chr1	47409361	777.853	66.4715	3.54869	0.00681695	TAL1	NM_003189	PROMOTER
chr2:175025646-175025705	A_17_P01686460	chr2	175025646	168.152	14.3798	3.54765	0.00682051	FLJ46347	NM_001005303	INSIDE
chr7:020599045-020599096	A_17_P05348462	chr7	20599045	1065.61	91.1395	3.54746	0.00682095	SP8	NM_182700	INSIDE
chrX:082565623-082565682	A_17_P11806373	chrX	82565623	198.738	8.57914	4.53389	0.00682156	POU3F4	NM_000307	PROMOTER
chr5:036026900-036026944	A_17_P03871379	chr5	36026900	287.171	24.5681	3.54706	0.00682235	UGT3A1	NM_152404	INSIDE
chr1:144470116-144470175	A_17_P00500325	chr1	144470116	613.444	52.5035	3.54645	0.00682425	GJA5	NM_005266	INSIDE
chr2:073058617-073058676	A_17_P01275196	chr2	73058617	441.485	37.7884	3.54635	0.00682458	EMX1	NM_004097	INSIDE
chr2:222987597-222987656	A_17_P15386530	chr2	222987597	1452.84	124.373	3.54613	0.00682526	FLJ32447	NM_153038	PROMOTER
chr3:191649940-191649999	A_17_P02854056	chr3	191649940	86.7977	7.43395	3.54546	0.00682781	UNQ846	NM_207316	INSIDE
chrX:070214942-070214998	A_17_P11783327	chrX	70214942	223.686	9.6899	4.52885	0.00682924	BC039198	NONE	Unknown
chr7:026959446-026959501	A_17_P05377920	chr7	26959446	4142.33	355.055	3.54433	0.00683111	HOXA6	NM_024014	INSIDE
chr14:053491058-053491113	A_17_P09299984	chr14	53491058	355.6	15.4668	4.52301	0.00683773	BMP4	NM_130851	PROMOTER
chr6:150485876-150485923	A_17_P05166049	chr6	150485876	257.507	22.1062	3.54208	0.00683854	ULBP3	NM_024518	PROMOTER
chr1:110863005-110863049	A_17_P00455198	chr1	110863005	2303.4	197.968	3.54042	0.00684387	KCNA2	NM_004974	PROMOTER
chr2:010811499-010811550	A_17_P15217284	chr2	10811499	637.525	54.801	3.54021	0.00684459	ATP6V1C2	NM_144583	PROMOTER
chr12:060870962-060871015	A_17_P08397942	chr12	60870962	587.183	25.6309	4.51786	0.00684546	FAM19A2	NM_178539	INSIDE
chr1:203069981-203070032	A_17_P00751105	chr1	203069981	356.675	30.6834	3.53908	0.00684833	RASSF5	NM_182663	INSIDE
chr9:001042777-001042830	A_17_P06542685	chr9	1042777	594.407	51.1434	3.53883	0.00684911	DMRT2	NM_006557	INSIDE
chr19:056918136-056918185	A_17_P10993967	chr19	56918136	304.533	13.3622	4.51037	0.00685724	HAS1	NM_001523	INSIDE
chr9:123849571-123849621	A_17_P06954312	chr9	123849571	3768.12	325.088	3.53494	0.00686187	LHX2	NM_004789	PROMOTER
chr6:026771444-026771503	A_17_P04627056	chr6	26771444	354.905	30.6223	3.53478	0.00686246	ZNF322A	NM_024639	PROMOTER
chr9:000490873-000490932	A_17_P06539921	chr9	490873	135.959	11.7314	3.53472	0.006863	ANKRD15	NM_015158	PROMOTER
chr7:143141201-143141260	A_17_P05841587	chr7	143141201	69.7706	6.01972	3.53485	0.00686378	OR6B1	NM_001005281	DOWNSTREAM
chr7:027001131-027001181	A_17_P05378252	chr7	27001131	1841.22	158.965	3.53388	0.00686537	HOXA11	NM_005523	PROMOTER
chr7:042041340-042041388	A_17_P15934227	chr7	42041340	524.316	45.2733	3.5337	0.00686598	GLI3	NM_000168	PROMOTER
chr9:104537400-104537459	A_17_P06868948	chr9	104537400	238.095	20.5632	3.5334	0.00686707	OR13D1	NM_001004484	DOWNSTREAM
chr16:080371079-080371128	A_17_P10148157	chr16	80371079	577.814	25.4892	4.50265	0.00686891	PLCG2	NM_002661	INSIDE
chr7:155109036-155109087	A_17_P05889824	chr7	155109036	4256.07	367.817	3.53246	0.00687004	SHH	NM_000193	PROMOTER
chr10:017533953-017534012	A_17_P07101573	chr10	17533953	165.92	14.3382	3.53255	0.00687005	ST8SIA6	NM_001004470	INSIDE
chr6:168661340-168661391	A_17_P05249076	chr6	168661340	342.812	29.6446	3.53158	0.00687302	SMOC2	NM_022138	INSIDE
chr2:237258986-237259036	A_17_P01983116	chr2	237258986	850.012	73.5989	3.52973	0.00687912	CMKOR1	NM_020311	PROMOTER
chr7:026995061-026995113	A_17_P15920240	chr7	26995061	6603.43	571.843	3.52952	0.00687977	HOXA11	NM_005523	INSIDE
chr6:030187443-030187493	A_17_P04638615	chr6	30187443	521.818	45.1882	3.52953	0.00687977	TRIM31	NM_007028	INSIDE
chr8:069024577-069024636	A_17_P06189230	chr8	69024577	114.732	9.93621	3.52943	0.00688062	DEPDC2	NM_024870	PROMOTER
chr3:188904002-188904061	A_17_P02839615	chr3	188904002	42.446	3.67525	3.52971	0.00688165	RTP2	NM_001004312	PROMOTER
chr5:121674823-121674882	A_17_P04240414	chr5	121674823	169.98	14.7327	3.52827	0.00688414	SNCAIP	NM_005460	PROMOTER
chr4:155771920-155771979	A_17_P03543092	chr4	155771920	157.029	13.6122	3.52806	0.00688491	DCHS2	NM_199348	PROMOTER
chr9:000203147-000203206	A_17_P06538434	chr9	203147	121.502	10.5348	3.52775	0.00688605	C9orf66	NM_152569	DOWNSTREAM
chr4:013225055-013225099	A_17_P15547123	chr4	13225055	2505.6	217.316	3.52729	0.0068872	BAPX1	NM_001189	PROMOTER
chr5:180007720-180007764	A_17_P04498626	chr5	180007720	906.546	78.6281	3.52726	0.00688728	FLT4	NM_002020	INSIDE
chr7:026974923-026974967	A_17_P05378050	chr7	26974923	2451.44	212.648	3.52709	0.00688786	HOXA7	NM_006896	PROMOTER
chr16:056616977-056617021	A_17_P10041468	chr16	56616977	98.9844	4.40474	4.49007	0.00689222	MMP15	NM_002428	INSIDE
chr5:027073612-027073671	A_17_P03833475	chr5	27073612	107.737	9.35616	3.52545	0.00689416	CDH9	NM_016279	INSIDE
chr10:135229629-135229685	A_17_P07593631	chr10	135229629	1025.64	45.7755	4.4858	0.00689522	CYP2E1	NM_000773	PROMOTER
chr19:058870879-058870938	A_17_P10998129	chr19	58870879	256.177	11.4589	4.4826	0.00690067	hsa-mir-515-1	hsa-mir-515-1	PROMOTER
chr5:003646920-003646968	A_17_P03725991	chr5	3646920	3003.32	261.217	3.52324	0.00690068	IRX1	NM_024337	PROMOTER
chr5:134903243-134903287	A_17_P04300622	chr5	134903243	417.55	36.3309	3.52268	0.00690259	NEUROG1	NM_006161	PROMOTER
chr6:032928692-032928744	A_17_P04648675	chr6	32928692	429.624	37.3827	3.52263	0.00690274	TAP1	NM_000593	INSIDE
chr11:129802137-129802186	A_17_P08120052	chr11	129802137	650.962	29.1492	4.48104	0.0069028	ADAMTS8	NM_007037	INSIDE
chr2:200158543-200158602	A_17_P01806038	chr2	200158543	288.496	25.113	3.52205	0.00690487	SATB2-FLJ32063	NM_015265-NM_153031	DIVERGENT_PROMOTER
chr7:026916530-026916574	A_17_P15920054	chr7	26916530	3142.07	273.661	3.52125	0.00690732	HOXA2	NM_006735	PROMOTER
chr7:116713435-116713484	A_17_P05722608	chr7	116713435	382.146	33.2831	3.52126	0.00690733	CFTR	NM_000492	PROMOTER
chr2:047714441-047714500	A_17_P01157694	chr2	47714441	65.5101	5.70522	3.52136	0.00690831	KCNK12	NM_022055	PROMOTER
chr6:001330099-001330143	A_17_P04506732	chr6	1330099	440.77	38.4009	3.52081	0.00690883	FOXF2	NM_001452	PROMOTER
chr1:161917471-161917530	A_17_P00566896	chr1	161917471	251.47	21.9151	3.52039	0.00691032	LMX1A	NM_177399	PROMOTER
chr19:059734855-059734914	A_17_P11000475	chr19	59734855	254.233	11.4344	4.4747	0.00691324	FLJ00060	NM_033206	PROMOTER
chr7:121105217-121105272	A_17_P05743383	chr7	121105217	427.635	37.314	3.51859	0.00691628	PTPRZ1	NM_002851	PROMOTER
chr6:151902422-151902481	A_17_P05172658	chr6	151902422	226.365	19.7601	3.51799	0.00691849	C6orf97	NM_025059	PROMOTER
chr11:059036023-059036082	A_17_P07820311	chr11	59036023	231.049	10.4394	4.46809	0.00692387	OR4D9	NM_001004711	PROMOTER
chr5:044424667-044424713	A_17_P03907640	chr5	44424667	2826.01	246.979	3.51631	0.00692392	FGF10	NM_004465	PROMOTER
chr6:144654594-144654653	A_17_P05139026	chr6	144654594	110.307	9.64356	3.51581	0.00692604	UTRN	NM_007124	PROMOTER
chr1:163692126-163692185	A_17_P00574791	chr1	163692126	233.527	20.4174	3.51572	0.00692609	MAEL	NM_032858	INSIDE
chr7:026966896-026966949	A_17_P05377987	chr7	26966896	1979.97	173.142	3.51545	0.00692681	HOXA7	NM_006896	INSIDE
chr7:155103881-155103930	A_17_P05889780	chr7	155103881	3250.46	284.322	3.51505	0.00692817	SHH	NM_000193	INSIDE
chr14:085067097-085067156	A_17_P09445106	chr14	85067097	436.707	19.7787	4.46465	0.00692897	FLRT2	NM_013231	INSIDE
chr7:121536712-121536771	A_17_P05745491	chr7	121536712	368.103	32.2084	3.5146	0.00692978	LOC389549	NM_001024613	INSIDE
chr10:102982620-102982679	A_17_P07432683	chr10	102982620	276.753	12.5382	4.46419	0.00693	LBX1	NM_006562	PROMOTER
chr2:064664756-064664815	A_17_P01235649	chr2	64664756	27.4839	2.4014	3.51664	0.0069315	AFTIPHILIN	NM_001002243	INSIDE
chr7:027014026-027014075	A_17_P05378358	chr7	27014026	3002.42	262.898	3.51355	0.00693322	HOXA13	NM_000522	PROMOTER
chr8:123860954-123861010	A_17_P06440107	chr8	123860954	225.167	19.7254	3.51287	0.00693561	ZHX2	NM_014943	PROMOTER
chr5:177355311-177355370	A_17_P15770066	chr5	177355311	2042.35	178.932	3.51275	0.00693593	PROP1	NM_006261	INSIDE
chr5:001274819-001274865	A_17_P03712857	chr5	1274819	473.403	41.4874	3.51232	0.00693741	SLC6A19	NM_001003841	INSIDE
chr2:219942115-219942165	A_17_P01900967	chr2	219942115	294.746	25.835	3.51208	0.00693827	TUBA4	NM_025019	PROMOTER
chr12:052620163-052620222	A_17_P08361912	chr12	52620163	593.292	26.9817	4.45869	0.00693854	HOXC13	NM_017410	INSIDE
chr4:082309775-082309820	A_17_P03215901	chr4	82309775	377.898	33.1346	3.51159	0.0069399	BMP3	NM_001201	INSIDE
chr14:020047702-020047761	A_17_P09154992	chr14	20047702	194.847	8.86849	4.45751	0.00694097	RNASE10	NM_001012975	PROMOTER
chr17:044429060-044429104	A_17_P16993523	chr17	44429060	363.006	16.5369	4.45623	0.00694266	IMP-1	NM_006546	PROMOTER
chr21:044957049-044957093	A_17_P11413234	chr21	44957049	721.233	32.877	4.45531	0.00694401	C21orf29	NM_144991	PROMOTER
chr17:044061121-044061165	A_17_P10350519	chr17	44061121	569.904	25.9794	4.45528	0.00694406	HOXB9	NM_024017	PROMOTER
chr6:071721173-071721232	A_17_P15829496	chr6	71721173	94.0197	8.25359	3.50987	0.0069466	B3GAT2	NM_080742	INSIDE
chr8:107738621-107738680	A_17_P06363996	chr8	107738621	354.903	31.1881	3.50836	0.00695089	OXR1	NM_181354	PROMOTER
chrX:100721959-100722018	A_17_P17380451	chrX	100721959	141.239	6.45715	4.4511	0.00695203	ARMCX2	NM_177949	PROMOTER
chr7:026917006-026917059	A_17_P15920057	chr7	26917006	1229.45	108.127	3.50722	0.00695469	HOXA2	NM_006735	PROMOTER
chr4:048829384-048829428	A_17_P03094284	chr4	48829384	283.492	24.9389	3.50684	0.00695606	FLJ21511	NM_025087	INSIDE
chr14:037138309-037138353	A_17_P09232558	chr14	37138309	328.683	15.0601	4.44789	0.00695609	FOXA1	NM_004496	PROMOTER
chr3:035656657-035656708	A_17_P02166974	chr3	35656657	87.6478	7.70128	3.50855	0.00695737	ARPP-21	NM_016300	PROMOTER
chr5:063292942-063292986	A_17_P03978947	chr5	63292942	546.511	48.1157	3.50567	0.00695996	HTR1A	NM_000524	INSIDE
chr11:113431322-113431380	A_17_P08041901	chr11	113431322	146.699	6.73149	4.44578	0.00696121	ZBTB16	NM_006006	PROMOTER
chr5:174805102-174805153	A_17_P04481188	chr5	174805102	247.134	21.7655	3.50518	0.00696183	DRD1	NM_000794	PROMOTER
chr7:116556688-116556740	A_17_P05722027	chr7	116556688	1169.31	103.015	3.50473	0.00696316	WNT2	NM_003391	INSIDE
chr12:064507784-064507843	A_17_P08413340	chr12	64507784	118.973	5.46343	4.44468	0.00696362	HMGA2	NM_003484	INSIDE
chr7:115906578-115906623	A_17_P05718522	chr7	115906578	1459.09	128.668	3.50335	0.00696788	MET	NM_000245	INSIDE
chr1:047199020-047199079	A_17_P15057297	chr1	47199020	180.834	15.9484	3.50318	0.00696858	CYP4X1	NM_178033	PROMOTER
chr4:046231300-046231359	A_17_P15564264	chr4	46231300	161.938	14.2894	3.50242	0.00697129	GABRA2	NM_000807	INSIDE
chr16:085154566-085154618	A_17_P10170635	chr16	85154566	325.409	15.0088	4.43838	0.00697187	FLJ12998-FOXC2	NM_022764-NM_005251	DIVERGENT_PROMOTER
chr6:046248598-046248657	A_17_P04710430	chr6	46248598	146.573	12.9355	3.50221	0.00697201	ENPP5	NM_021572	PROMOTER
chr19:054621050-054621096	A_17_P10986502	chr19	54621050	1202.7	55.4885	4.43795	0.00697235	TIP39	NM_178449	PROMOTER
chr10:011101592-011101651	A_17_P07071702	chr10	11101592	419.238	37.0219	3.50132	0.00697491	CUGBP2	NM_006561	INSIDE
chr4:000606068-000606127	A_17_P02886455	chr4	606068	246.045	21.7277	3.50132	0.00697493	PDE6B	NM_000283	PROMOTER
chr4:004981754-004981801	A_17_P02902330	chr4	4981754	543.022	47.9967	3.5	0.00697935	MSX1	NM_002448	INSIDE
chr7:026998299-026998343	A_17_P05378230	chr7	26998299	1989.24	175.834	3.49993	0.00697956	HOXA11	NM_005523	PROMOTER
chr11:123278003-123278062	A_17_P08089043	chr11	123278003	95.2597	4.409	4.43334	0.00698318	OR8D4	NM_001005197	PROMOTER
chr8:100027326-100027385	A_17_P16119670	chr8	100027326	190.761	16.8745	3.49885	0.00698351	OSR2	NM_053001	INSIDE
chr8:134378922-134378966	A_17_P16137074	chr8	134378922	185.17	16.3917	3.49781	0.006987	NDRG1	NM_006096	PROMOTER
chr4:089437160-089437204	A_17_P03247868	chr4	89437160	185.17	16.3917	3.49781	0.00698703	ABCG2	NM_004827	INSIDE
chr8:027171970-027172019	A_17_P06028125	chr8	27171970	41.4479	3.66725	3.49853	0.00698791	STMN4	NM_030795	PROMOTER
chr7:085917632-085917691	A_17_P05587398	chr7	85917632	350.043	31.0162	3.49644	0.00699163	GRM3	NM_000840	PROMOTER
chr7:026986650-026986695	A_17_P05378148	chr7	26986650	1639.83	145.366	3.49579	0.00699382	HOXA10	NM_018951	INSIDE
LACC:SRN_11868	LACC:SRN_11868	NONE	NONE	93.0818	8.25081	3.49589	0.00699461	LACC:SRN_11868	NONE	NONE
chr20:017988685-017988744	A_17_P11094292	chr20	17988685	319.26	14.9189	4.41952	0.00700316	OVOL2	NM_021220	PROMOTER
chr17:044567457-044567516	A_17_P10352574	chr17	44567457	196.621	9.18901	4.41936	0.00700419	B4GALNT2	NM_153446	INSIDE
chr7:015500758-015500805	A_17_P05323192	chr7	15500758	721.472	64.1061	3.49241	0.0070055	MEOX2	NM_005924	PROMOTER
chr20:001922138-001922197	A_17_P11019941	chr20	1922138	414.782	19.4078	4.41765	0.00700623	PDYN	NM_024411	INSIDE
chr6:118336942-118337001	A_17_P05014184	chr6	118336942	327.686	29.1246	3.492	0.00700719	SLC35F1	NM_001029858	INSIDE
chr6:168657961-168658020	A_17_P05249057	chr6	168657961	189.382	16.8443	3.49097	0.0070107	SMOC2	NM_022138	PROMOTER
chr4:004977791-004977841	A_17_P02902307	chr4	4977791	1942.5	172.8	3.49074	0.00701128	MSX1	NM_002448	PROMOTER
chr3:140152320-140152377	A_17_P02617886	chr3	140152320	347.38	30.9214	3.48984	0.00701447	FOXL2	NM_023067	PROMOTER
chr7:042035642-042035701	A_17_P05448375	chr7	42035642	194.795	17.3401	3.48977	0.00701496	GLI3	NM_000168	INSIDE
chr3:188944116-188944168	A_17_P02839877	chr3	188944116	1778.87	158.4	3.48932	0.00701621	BCL6	NM_138931	PROMOTER
chr1:090892668-090892727	A_17_P00371044	chr1	90892668	124.718	11.1131	3.48833	0.00702004	BARHL2	NM_020063	INSIDE
chr17:030592535-030592594	A_17_P10299772	chr17	30592535	261.987	12.3288	4.40939	0.00702031	MGC19764	NM_144975	PROMOTER
chr20:052221699-052221758	A_17_P11221006	chr20	52221699	995.846	46.9365	4.40714	0.00702384	CYP24A1	NM_000782	INSIDE
chr12:112376196-112376240	A_17_P08622969	chr12	112376196	1039.54	49.0218	4.40638	0.00702512	LHX5	NM_022363	PROMOTER
chr21:034965574-034965633	A_17_P11364976	chr21	34965574	218.851	10.3221	4.40615	0.00702587	CLIC6	NM_053277	INSIDE
chr17:044027941-044027985	A_17_P10350265	chr17	44027941	1167.19	55.095	4.40498	0.00702749	HOXB5	NM_002147	PROMOTER
chr4:057363014-057363058	A_17_P03114656	chr4	57363014	104.834	9.35763	3.48582	0.00702905	HOP	NM_139211	INSIDE
chr21:033840570-033840629	A_17_P11359514	chr21	33840570	16.2422	0.738817	4.45838	0.0070291	SON	NM_032195	INSIDE
chr7:022536017-022536064	A_17_P05357680	chr7	22536017	665.954	59.4688	3.48522	0.00703051	IL6	NM_000600	PROMOTER
chr19:010259786-010259836	A_17_P10880938	chr19	10259786	926.026	43.796	4.40218	0.00703225	ICAM4	NM_001039132	INSIDE
chr8:120495596-120495643	A_17_P06424763	chr8	120495596	241.123	21.5554	3.48364	0.00703611	NOV	NM_002514	PROMOTER
chr5:141241882-141241930	A_17_P04330063	chr5	141241882	257.946	23.0669	3.48317	0.00703779	PCDH1	NM_002587	PROMOTER
chr2:172778238-172778288	A_17_P01675456	chr2	172778238	1532.66	137.197	3.48171	0.00704275	DLX1	NM_001038493	INSIDE
chr2:222261280-222261324	A_17_P01913163	chr2	222261280	6093.67	545.626	3.48133	0.0070441	EPHA4	NM_004438	INSIDE
chr3:193930270-193930329	A_17_P02863966	chr3	193930270	232.556	20.823	3.48133	0.00704424	FGF12	NM_004113	PROMOTER
chr12:052631695-052631749	A_17_P08362009	chr12	52631695	386.645	18.4077	4.39263	0.00704881	HOXC12	NM_173860	PROMOTER
chr8:012856302-012856361	A_17_P05960951	chr8	12856302	158.742	14.2495	3.4777	0.00705716	FLJ36980	NM_001039462	INSIDE
chr20:060486996-060487055	A_17_P17208499	chr20	60486996	308.729	14.7508	4.38748	0.0070577	GATA5	NM_080473	PROMOTER
chr19:014803125-014803184	A_17_P10893411	chr19	14803125	125.078	5.98027	4.38647	0.00706045	OR7A5	NM_017506	PROMOTER
chr6:049714252-049714311	A_17_P04725976	chr6	49714252	301.988	27.1344	3.4763	0.00706188	RHAG	NM_000324	PROMOTER
chr7:020600763-020600807	A_17_P05348470	chr7	20600763	429.884	38.6557	3.47519	0.00706573	SP8	NM_198956	PROMOTER
chr19:014977692-014977737	A_17_P10893974	chr19	14977692	170.011	8.16123	4.3807	0.00707	FLJ40365	NM_173482	PROMOTER
chr4:156024432-156024491	A_17_P03544576	chr4	156024432	216.11	19.4588	3.47327	0.00707271	LRAT	NM_004744	INSIDE
chr7:121541972-121542031	A_17_P05745527	chr7	121541972	254.784	22.9528	3.47253	0.00707525	LOC389549	NM_001024613	PROMOTER
chr4:013220102-013220146	A_17_P02936314	chr4	13220102	829.415	74.7283	3.47237	0.0070757	BAPX1	NM_001189	INSIDE
chr17:044162533-044162592	A_17_P10350932	chr17	44162533	467.747	22.5122	4.37695	0.00707582	HOXB13	NM_006361	PROMOTER
chr6:129246572-129246624	A_17_P05065901	chr6	129246572	136.5	12.3003	3.47214	0.0070775	LAMA2	NM_000426	INSIDE
chr7:097006087-097006131	A_17_P15991823	chr7	97006087	590.386	53.2423	3.47101	0.00708049	TAC1	NM_003182	INSIDE
chr6:132900506-132900565	A_17_P05084095	chr6	132900506	82.1529	7.41301	3.47018	0.00708425	TAAR9	NM_175057	PROMOTER
chr11:006749263-006749322	A_17_P07620518	chr11	6749263	465.708	22.4948	4.37177	0.0070853	OR2AG2	NM_001004490	PROMOTER
chr11:007920226-007920285	A_17_P16417710	chr11	7920226	162.521	7.85128	4.37156	0.00708647	OR10A3	NM_001003745	PROMOTER
chrX:066549606-066549650	A_17_P11770995	chrX	66549606	427.994	20.7153	4.36882	0.0070901	AR	NM_000044	INSIDE
chrX:137517679-137517730	A_17_P11984288	chrX	137517679	288.903	13.9909	4.36802	0.00709177	FGF13	NM_004114	INSIDE
chr4:002388675-002388719	A_17_P02893617	chr4	2388675	524.063	47.3817	3.46734	0.00709358	ZFYVE28	NM_020972	PROMOTER
chr6:100160959-100161018	A_17_P04931715	chr6	100160959	358.542	32.4445	3.4661	0.00709805	PRDM13	NM_021620	PROMOTER
chr7:026988618-026988662	A_17_P05378157	chr7	26988618	892.14	80.7578	3.4656	0.00709978	HOXA10	NM_018951	PROMOTER
chr7:026967112-026967171	A_17_P05377989	chr7	26967112	1003.83	90.89	3.46525	0.00710102	HOXA7	NM_006896	INSIDE
chr16:003343097-003343155	A_17_P09893757	chr16	3343097	326.602	15.9506	4.35585	0.00711306	OR2C1	NM_012368	PROMOTER
chr4:111916485-111916536	A_17_P15601769	chr4	111916485	2349.21	213.673	3.4587	0.00712451	PITX2	NM_153427	PROMOTER
chr6:031647888-031647935	A_17_P04643776	chr6	31647888	105.76	9.62084	3.45849	0.00712588	LTA	NM_000595	PROMOTER
chr21:044490079-044490123	A_17_P11411446	chr21	44490079	452.966	22.2632	4.34667	0.0071295	ICOSLG	NM_015259	PROMOTER
chr12:053101624-053101669	A_17_P08364761	chr12	53101624	470.284	23.127	4.34588	0.00713088	ITGA5	NM_002205	PROMOTER
chr3:062331481-062331526	A_17_P02288203	chr3	62331481	594.08	54.1177	3.45648	0.00713251	ZNF312	NM_018008	INSIDE
chr14:032474901-032474960	A_17_P09210438	chr14	32474901	235.101	11.5706	4.34475	0.00713319	NPAS3	NM_022123	PROMOTER
chr1:148779819-148779863	A_17_P00510210	chr1	148779819	333.943	30.4364	3.45573	0.00713529	S100A10	NM_002966	PROMOTER
chr11:064166285-064166337	A_17_P07839763	chr11	64166285	1261.9	62.2371	4.34168	0.00713828	NRXN2	NM_138734	INSIDE
chr5:001253483-001253527	A_17_P15655408	chr5	1253483	554.416	50.5613	3.45486	0.00713839	SLC6A19	NM_001003841	PROMOTER
chr6:170519318-170519371	A_17_P15895189	chr6	170519318	2240.84	204.365	3.45482	0.00713851	DLL1	NM_005618	PROMOTER
chr3:140150982-140151041	A_17_P02617877	chr3	140150982	430.811	39.3258	3.45351	0.0071433	FOXL2	NM_023067	PROMOTER
chr8:135794568-135794612	A_17_P16138017	chr8	135794568	23.331	2.12164	3.45899	0.00714338	ZNF406	NM_020863	PROMOTER
chrX:150813617-150813667	A_17_P12028988	chrX	150813617	320.67	15.8512	4.33842	0.00714442	GABRE	NM_004961	INSIDE
chr7:150184721-150184771	A_17_P16038323	chr7	150184721	168.233	15.3656	3.45268	0.00714652	ACCN3	NM_004769	INSIDE
chr11:004525265-004525324	A_17_P07610219	chr11	4525265	77.5735	3.83507	4.33824	0.0071475	OR52M1	NM_001004137	DOWNSTREAM
chr6:107064773-107064818	A_17_P04964018	chr6	107064773	127.969	11.6904	3.4524	0.00714773	AIM1	NM_001624	PROMOTER
chr20:020293342-020293386	A_17_P11104469	chr20	20293342	348.784	17.2714	4.33587	0.00714896	INSM1	NM_002196	PROMOTER
chr6:132768779-132768838	A_17_P05083535	chr6	132768779	124.565	11.3916	3.45085	0.00715342	MOXD1	NM_001031699	PROMOTER
chr1:244347179-244347223	A_17_P15204905	chr1	244347179	383.925	35.1345	3.44986	0.00715656	TRIM58	NM_015431	INSIDE
chr14:053498549-053498608	A_17_P09300041	chr14	53498549	204.674	10.2016	4.32646	0.00716647	BMP4	NM_130850	PROMOTER
chr1:183526454-183526513	A_17_P00663595	chr1	183526454	114.342	10.4948	3.44562	0.00717263	PLA2G4A	NM_024420	PROMOTER
chr9:070652904-070652963	A_17_P06723962	chr9	70652904	300.82	27.6129	3.44549	0.00717268	TRPM3	NM_001007470	INSIDE
chr3:048445042-048445087	A_17_P02222407	chr3	48445042	32.6838	2.99843	3.4463	0.00717394	PLXNB1	NM_002673	PROMOTER
chr6:075971903-075971958	A_17_P04825684	chr6	75971903	1811.4	166.401	3.44436	0.00717657	COL12A1	NM_004370	INSIDE
chr5:045730631-045730690	A_17_P03913826	chr5	45730631	246.674	22.6737	3.44352	0.00717979	HCN1	NM_021072	INSIDE
chr19:018579612-018579667	A_17_P17117319	chr19	18579612	1236.76	61.982	4.31857	0.00718039	CRLF1-C19orf4	NM_004750-NM_012109	DIVERGENT_PROMOTER
chr6:133128285-133128344	A_17_P15863139	chr6	133128285	230.466	21.1918	3.44297	0.0071818	VNN2	NM_078488	PROMOTER
chr1:162053964-162054014	A_17_P00567792	chr1	162053964	2595.47	238.742	3.44247	0.00718352	LMX1A	NM_177398	INSIDE
chr6:151904652-151904711	A_17_P05172668	chr6	151904652	197.361	18.1583	3.44214	0.00718488	C6orf97	NM_025059	PROMOTER
chr2:236856306-236856365	A_17_P01981217	chr2	236856306	146.978	13.5225	3.44217	0.00718506	GBX2	NM_001485	INSIDE
chr4:075676956-075677015	A_17_P03186470	chr4	75676956	146.978	13.5225	3.44217	0.00718518	AREG	NM_001657	INSIDE
chr17:010041066-010041125	A_17_P10225457	chr17	10041066	228.981	11.4966	4.31595	0.00718582	GAS7	NM_201433	INSIDE
chr3:147360938-147360992	A_17_P02650626	chr3	147360938	817.154	75.2343	3.44115	0.00718839	PLOD2	NM_000935	INSIDE
chrX:118523040-118523099	A_17_P17391528	chrX	118523040	228.299	11.4882	4.3127	0.00719173	NKRF	NM_017544	PROMOTER
chr4:147920125-147920179	A_17_P03505542	chr4	147920125	237.36	21.8761	3.43965	0.00719402	POU4F2	NM_004575	INSIDE
chr6:049717102-049717161	A_17_P04725992	chr6	49717102	74.1168	6.83043	3.43975	0.00719525	RHAG	NM_000324	PROMOTER
chr7:155103552-155103599	A_17_P05889776	chr7	155103552	1793.53	165.374	3.43899	0.0071963	SHH	NM_000193	INSIDE
chr5:001254030-001254082	A_17_P15655411	chr5	1254030	89.3505	8.23722	3.43925	0.00719671	SLC6A19	NM_001003841	PROMOTER
chr2:019478449-019478502	A_17_P01026135	chr2	19478449	3859.52	355.905	3.43886	0.0071968	OSR1	NM_145260	INSIDE
chr18:053251857-053251916	A_17_P10736339	chr18	53251857	284.387	14.3502	4.30872	0.00719896	ONECUT2	NM_004852	PROMOTER
chr1:047614525-047614574	A_17_P00182005	chr1	47614525	494.22	45.6072	3.43782	0.00720067	FOXD2	NM_004474	INSIDE
chr7:020600289-020600334	A_17_P05348468	chr7	20600289	4262.42	393.613	3.43682	0.00720432	SP8	NM_198956	PROMOTER
chr19:056336207-056336266	A_17_P10991969	chr19	56336207	578.546	29.2561	4.30562	0.0072045	SIGLEC7	NM_014385	PROMOTER
chr8:019841499-019841544	A_17_P16076102	chr8	19841499	228.756	21.1339	3.43617	0.0072068	LPL	NM_000237	INSIDE
chr1:162240974-162241019	A_17_P00568773	chr1	162240974	297.459	27.4895	3.43573	0.0072084	LRRC52	NM_001005214	PROMOTER
chr1:018179040-018179090	A_17_P00069307	chr1	18179040	517.558	47.8574	3.43491	0.00721141	IGSF21	NM_032880	PROMOTER
chr6:032896062-032896121	A_17_P04648457	chr6	32896062	377.257	34.886	3.43483	0.00721176	HLA-DOB	NM_002120	PROMOTER
chr2:222985999-222986046	A_17_P01917006	chr2	222985999	730.422	67.5493	3.43472	0.00721212	FLJ32447	NM_153038	PROMOTER
chr1:037768675-037768719	A_17_P00144039	chr1	37768675	669.837	61.9538	3.43454	0.00721276	RSPO1	NM_001038633	INSIDE
chr21:044954255-044954312	A_17_P17242477	chr21	44954255	797.107	40.4331	4.30117	0.00721277	C21orf29	NM_144991	INSIDE
chr4:156055525-156055584	A_17_P03544762	chr4	156055525	83.0004	7.68069	3.43381	0.00721668	MGC27016	NM_144979	PROMOTER
LACC:GD36C_6_r	LACC:GD36C_6_r	NONE	NONE	83.0004	7.68069	3.43381	0.00721728	LACC:GD36C_6_r	NONE	NONE
chr2:073053514-073053567	A_17_P01275170	chr2	73053514	3003.75	278.096	3.43311	0.00721805	EMX1	NM_004097	PROMOTER
chr2:175029408-175029467	A_17_P01686479	chr2	175029408	277.734	25.7296	3.4322	0.0072216	FLJ46347	NM_001005303	PROMOTER
chr6:075973959-075974010	A_17_P15831922	chr6	75973959	3338.09	309.426	3.43136	0.00722459	COL12A1	NM_080645	PROMOTER
chr17:044044259-044044303	A_17_P10350401	chr17	44044259	1134.18	57.8876	4.29225	0.00722954	HOXB7	NM_004502	PROMOTER
chr20:052222869-052222913	A_17_P11221016	chr20	52222869	645.906	33.0048	4.29058	0.00723272	CYP24A1	NM_000782	INSIDE
chr8:054327483-054327540	A_17_P16095196	chr8	54327483	200.597	18.6219	3.42923	0.00723274	OPRK1	NM_000912	PROMOTER
chr7:026935095-026935143	A_17_P05377720	chr7	26935095	1565.41	145.346	3.42898	0.00723344	HOXA3	NM_030661	PROMOTER
chr14:032472939-032472996	A_17_P09210423	chr14	32472939	254.766	13.0237	4.28996	0.00723423	NPAS3	NM_022123	PROMOTER
chr14:019757121-019757180	A_17_P09153682	chr14	19757121	213.934	10.9683	4.28575	0.00724244	OR11H6	NM_001004480	PROMOTER
chr14:057688408-057688452	A_17_P16706375	chr14	57688408	141.465	7.25269	4.28578	0.00724272	C14orf37	NM_001001872	INSIDE
chr12:057600068-057600112	A_17_P16564281	chr12	57600068	177.112	9.08324	4.28531	0.00724395	LRIG3	NM_153377	INSIDE
chr7:026981381-026981426	A_17_P05378106	chr7	26981381	2359.74	219.762	3.42462	0.00724974	HOXA9	NM_152739	PROMOTER
chr17:013447599-013447658	A_17_P10241174	chr17	13447599	264.201	13.59	4.28102	0.00725135	HS3ST3A1	NM_006042	PROMOTER
chr17:003061053-003061112	A_17_P10196746	chr17	3061053	196.987	10.1428	4.27957	0.00725409	OR1A1	NM_014565	PROMOTER
chr9:070713653-070713700	A_17_P06724339	chr9	70713653	534.422	49.8483	3.42236	0.00725825	TRPM3	NM_206948	PROMOTER
chr6:137855071-137855130	A_17_P05108704	chr6	137855071	199.291	18.5884	3.4224	0.00725826	OLIG3	NM_175747	INSIDE
chr12:057601301-057601357	A_17_P16564290	chr12	57601301	300.863	15.5187	4.27703	0.00725886	LRIG3	NM_153377	PROMOTER
chr8:006722430-006722479	A_17_P05940822	chr8	6722430	461.411	43.0581	3.42169	0.00726077	DEFB1	NM_005218	INSIDE
chr7:034575049-034575108	A_17_P05413849	chr7	34575049	292.63	27.3109	3.42153	0.00726146	AAA1	NM_207290	PROMOTER
chr7:142268167-142268226	A_17_P05838928	chr7	142268167	188.04	17.5495	3.42154	0.0072615	OR6V1	NM_001001667	DOWNSTREAM
chr1:033316070-033316114	A_17_P00125050	chr1	33316070	79.3178	7.40376	3.42132	0.00726307	TRIM62	NM_018207	INSIDE
chr6:137859387-137859431	A_17_P15865933	chr6	137859387	4657.85	434.867	3.42102	0.00726327	OLIG3	NM_175747	PROMOTER
chr9:133178009-133178053	A_17_P06993536	chr9	133178009	311.198	29.0619	3.42063	0.0072648	ABO	NM_020469	INSIDE
chr1:244343529-244343588	A_17_P00930631	chr1	244343529	292.146	27.2929	3.42009	0.00726688	TRIM58	NM_015431	PROMOTER
chr2:031718062-031718106	A_17_P01084502	chr2	31718062	5211.38	487.022	3.41961	0.00726859	SRD5A2	NM_000348	PROMOTER
chr3:191522324-191522383	A_17_P02853348	chr3	191522324	301.102	28.1466	3.41922	0.00727011	CLDN1	NM_021101	INSIDE
chr7:026989120-026989169	A_17_P05378159	chr7	26989120	2821.24	263.738	3.41915	0.0072703	HOXA10	NM_018951	PROMOTER
chr5:172595899-172595948	A_17_P04471773	chr5	172595899	1858.24	173.736	3.41897	0.00727101	NKX2-5	NM_004387	PROMOTER
chr6:133076753-133076801	A_17_P05085018	chr6	133076753	198.636	18.5716	3.41896	0.00727129	VNN1	NM_004666	INSIDE
chr8:057283173-057283232	A_17_P06136491	chr8	57283173	198.636	18.5716	3.41896	0.00727132	PLAG1	NM_002655	INSIDE
chr5:063839859-063839918	A_17_P03980751	chr5	63839859	198.636	18.5716	3.41896	0.00727134	R7BP	NM_001029875	INSIDE
chr5:003647346-003647405	A_17_P03725996	chr5	3647346	3490.87	326.423	3.41877	0.00727173	IRX1	NM_024337	PROMOTER
chr1:162054066-162054110	A_17_P00567793	chr1	162054066	2877.28	269.054	3.41873	0.00727188	LMX1A	NM_177398	INSIDE
chr2:027398727-027398771	A_17_P01063271	chr2	27398727	5268.35	492.818	3.41822	0.00727381	SLC30A3	NM_003459	PROMOTER
chr12:112371905-112371949	A_17_P08622940	chr12	112371905	324.733	16.8508	4.26837	0.00727539	LHX5	NM_022363	INSIDE
chr7:038818043-038818102	A_17_P05432143	chr7	38818043	319.736	29.9224	3.41758	0.0072763	POU6F2	NM_007252	PROMOTER
chr2:200156389-200156433	A_17_P01806016	chr2	200156389	5117.65	479.078	3.41715	0.00727787	SATB2-FLJ32063	NM_015265-NM_153031	DIVERGENT_PROMOTER
chr6:137858702-137858750	A_17_P05108724	chr6	137858702	2197.97	205.767	3.41709	0.0072781	OLIG3	NM_175747	PROMOTER
chr6:100159108-100159167	A_17_P04931696	chr6	100159108	1422.95	133.317	3.41594	0.00728245	PRDM13	NM_021620	PROMOTER
chr9:136319329-136319374	A_17_P07007700	chr9	136319329	358.575	33.6017	3.41567	0.00728355	LHX3	NM_014564	INSIDE
chr2:012807506-012807550	A_17_P15218744	chr2	12807506	158.803	14.877	3.41608	0.00728519	TRIB2	NM_021643	PROMOTER
chr7:115758243-115758302	A_17_P05717627	chr7	115758243	318.817	29.8878	3.4151	0.00728572	CAV1	NM_001753	PROMOTER
chr2:157017186-157017245	A_17_P01598649	chr2	157017186	400.438	37.5714	3.41387	0.00729036	NR4A2	NM_173173	PROMOTER
chrX:128864587-128864646	A_17_P11949659	chrX	128864587	193.876	10.1199	4.25987	0.00729226	BCORL1	NM_021946	INSIDE
chr19:047039754-047039807	A_17_P10965718	chr19	47039754	321.553	16.7935	4.25908	0.00729347	LYPD4	NM_173506	INSIDE
chr4:075228003-075228062	A_17_P03184555	chr4	75228003	137.016	12.8744	3.41176	0.00729864	CXCL5	NM_002994	INSIDE
chr7:141457886-141457945	A_17_P05835682	chr7	141457886	209.189	19.6569	3.4117	0.00729869	BC070387	NONE	Unknown
chr6:170521705-170521763	A_17_P05257613	chr6	170521705	3204.09	301.11	3.41155	0.00729911	DLL1	NM_005618	PROMOTER
chr7:026971281-026971340	A_17_P05378021	chr7	26971281	2071.35	194.679	3.41141	0.00729968	HOXA7	NM_006896	PROMOTER
chr2:102065816-102065875	A_17_P01365300	chr2	102065816	143.58	13.4942	3.41144	0.00729992	IL1R2	NM_004633	PROMOTER
chr5:076974853-076974912	A_17_P04032702	chr5	76974853	2888.49	271.635	3.41057	0.00730285	OTP	NM_032109	PROMOTER
chr19:050782618-050782662	A_17_P17148185	chr19	50782618	166.671	8.73577	4.25392	0.00730471	OPA3	NM_001017989	PROMOTER
chr19:059454577-059454621	A_17_P10999684	chr19	59454577	347.181	18.2181	4.25224	0.00730675	LILRB5	NM_006840	PROMOTER
chr7:026979938-026979992	A_17_P05378091	chr7	26979938	3570.11	336.053	3.40921	0.00730805	HOXA9	NM_152739	PROMOTER
chr6:138225447-138225506	A_17_P05110402	chr6	138225447	335.972	31.6262	3.40915	0.00730834	TNFAIP3	NM_006290	PROMOTER
chr1:026971848-026971907	A_17_P00103332	chr1	26971848	1186.32	111.678	3.40907	0.00730859	C1orf172	NM_152365	PROMOTER
chr11:063014498-063014545	A_17_P16459685	chr11	63014498	619.896	32.5796	4.24998	0.00731106	HRASLS5	NM_054108	INSIDE
chr9:001038494-001038549	A_17_P06542652	chr9	1038494	676.602	63.7686	3.40739	0.00731503	DMRT2	NM_006557	PROMOTER
chr19:046187706-046187754	A_17_P10963371	chr19	46187706	278.786	14.6887	4.24638	0.00731843	CYP2B6	NM_000767	PROMOTER
chr17:036725653-036725709	A_17_P10322001	chr17	36725653	489.371	25.8005	4.24546	0.00731999	KRTAP17-1	NM_031964	PROMOTER
chr12:053273154-053273207	A_17_P16561325	chr12	53273154	223.768	11.7979	4.2454	0.00732044	PPP1R1A	NM_006741	PROMOTER
chrX:150532785-150532833	A_17_P12027685	chrX	150532785	214.433	11.3217	4.24336	0.00732478	PRRG3	NM_024082	PROMOTER
chr2:072288641-072288696	A_17_P01272107	chr2	72288641	220.793	20.8498	3.40459	0.00732589	CYP26B1	NM_019885	PROMOTER
chr14:056340089-056340148	A_17_P09313540	chr14	56340089	153.483	8.11164	4.24194	0.00732841	OTX2	NM_172337	INSIDE
chr17:045702269-045702313	A_17_P10357807	chr17	45702269	184.193	9.73845	4.24138	0.00732904	TMEM92	NM_153229	PROMOTER
chr17:036855077-036855132	A_17_P10322688	chr17	36855077	177.469	9.38756	4.24067	0.00733009	KRTHA8	NM_006771	PROMOTER
chr2:230402481-230402540	A_17_P01952256	chr2	230402481	57.0744	5.39646	3.40276	0.00733475	DNER	NM_139072	INSIDE
chr6:029162854-029162913	A_17_P04635271	chr6	29162854	195.356	18.4867	3.40155	0.00733778	OR2B3	NM_001005226	INSIDE
chrX:030086005-030086057	A_17_P11671893	chrX	30086005	231.331	12.2735	4.23634	0.00733837	NR0B1	NM_000475	INSIDE
chr6:132935180-132935239	A_17_P05084296	chr6	132935180	251.101	23.7653	3.40134	0.00733839	TAAR6	NM_175067	DOWNSTREAM
chr6:118337108-118337167	A_17_P05014186	chr6	118337108	81.1138	7.67441	3.40182	0.00733848	SLC35F1	NM_001029858	INSIDE
chr4:078175076-078175120	A_17_P03196694	chr4	78175076	276.647	26.1895	3.40098	0.0073397	LOC345079	NM_001029870	INSIDE
chr1:002958765-002958809	A_17_P00007290	chr1	2958765	2493.2	236.274	3.39947	0.00734548	ACTRT2	NM_080431	PROMOTER
chr9:000963803-000963862	A_17_P06542224	chr9	963803	1135	107.562	3.39945	0.00734553	DMRT3	NM_021240	PROMOTER
chr19:056148441-056148497	A_17_P10991251	chr19	56148441	762.294	40.5775	4.23159	0.00734752	KLK5	NM_012427	PROMOTER
chr19:052217976-052218035	A_17_P10979636	chr19	52217976	534.023	28.4445	4.23068	0.00734941	NPAS1	NM_002517	INSIDE
chr1:149412607-149412666	A_17_P00512736	chr1	149412607	160.631	15.2368	3.39812	0.00735103	LCE3A	NM_178431	PROMOTER
chr1:044546295-044546348	A_17_P00171630	chr1	44546295	4416.9	419.089	3.39771	0.00735228	C1orf164	NM_018150	INSIDE
chr6:130077504-130077563	A_17_P05070517	chr6	130077504	164.75	15.6358	3.39735	0.00735406	ARHGAP18	NM_033515	PROMOTER
chr1:087504053-087504105	A_17_P00355668	chr1	87504053	53.6397	5.08951	3.3977	0.00735437	LMO4	NM_006769	PROMOTER
chr19:009099959-009100012	A_17_P10877995	chr19	9099959	229.373	12.2443	4.22752	0.00735629	OR7G3	NM_001001958	PROMOTER
chr20:020294555-020294614	A_17_P11104480	chr20	20294555	272.994	14.5882	4.226	0.00735885	INSM1	NM_002196	PROMOTER
chr6:117853907-117853954	A_17_P05012432	chr6	117853907	249.524	23.7052	3.3959	0.00735939	ROS1	NM_002944	PROMOTER
chr13:099420217-099420271	A_17_P16663695	chr13	99420217	203.015	10.8564	4.22497	0.0073615	ZIC5	NM_033132	INSIDE
chr9:130566589-130566633	A_17_P06981660	chr9	130566589	891.228	84.8088	3.39351	0.00736858	PRDM12	NM_021619	PROMOTER
chrX:118523353-118523412	A_17_P17391531	chrX	118523353	156.731	8.4061	4.22072	0.00736991	NKRF	NM_017544	PROMOTER
chrX:101216320-101216376	A_17_P11854405	chrX	101216320	656.343	35.2179	4.22007	0.00737074	NGFRAP1L1	NM_001012978	INSIDE
chr20:020294171-020294230	A_17_P11104477	chr20	20294171	493.115	26.4644	4.2198	0.00737149	INSM1	NM_002196	PROMOTER
chr19:059544417-059544476	A_17_P17160491	chr19	59544417	283.001	15.1978	4.21887	0.00737332	LILRA4	NM_012276	PROMOTER
chr12:073887186-073887232	A_17_P08455893	chr12	73887186	772.128	41.4763	4.21848	0.00737396	KCNC2	NM_139137	INSIDE
chr3:147364765-147364824	A_17_P02650655	chr3	147364765	164.005	15.6215	3.39214	0.00737417	PLOD2	NM_182943	PROMOTER
chr8:067097536-067097595	A_17_P06181129	chr8	67097536	423.331	40.3277	3.39194	0.00737473	DNAJC5B	NM_033105	INSIDE
chr12:045759432-045759491	A_17_P08331953	chr12	45759432	458.086	24.6264	4.21734	0.00737637	AMIGO2	NM_181847	INSIDE
chr7:026993994-026994046	A_17_P05378207	chr7	26993994	3926.13	374.325	3.39074	0.00737936	HOXA11	NM_005523	INSIDE
chr8:069401249-069401308	A_17_P06191309	chr8	69401249	182.609	17.4143	3.39041	0.00738081	BC041961	NONE	Unknown
chr3:054129839-054129890	A_17_P02248065	chr3	54129839	479.295	45.7437	3.38927	0.00738514	CACNA2D3	NM_018398	PROMOTER
chr1:167359639-167359698	A_17_P00591343	chr1	167359639	613.778	58.627	3.38808	0.00738979	PRRX1	NM_006902	PROMOTER
chr8:146245478-146245536	A_17_P06538324	chr8	146245478	140.987	13.4764	3.38705	0.00739426	C8orf33	NM_023080	PROMOTER
chr5:054564237-054564285	A_17_P03937912	chr5	54564237	941.998	90.0788	3.38646	0.00739612	UNG2	NM_001024592	INSIDE
chr2:119324359-119324418	A_17_P01432361	chr2	119324359	3042.37	290.978	3.38621	0.00739708	EN1	NM_001426	PROMOTER
chr1:157805269-157805328	A_17_P00548090	chr1	157805269	442.914	42.3672	3.38601	0.00739795	F11R	NM_144502	PROMOTER
chr12:004789402-004789446	A_17_P16525798	chr12	4789402	234.641	12.7088	4.20656	0.00739894	KCNA6	NM_002235	INSIDE
chr16:082395197-082395253	A_17_P10158097	chr16	82395197	304.283	16.4847	4.20622	0.00739911	HSBP1	NM_001537	PROMOTER
chr7:026977050-026977100	A_17_P05378072	chr7	26977050	2368.58	226.715	3.38507	0.0074016	HOXA9	NM_152739	INSIDE
chr15:082114641-082114687	A_17_P09796612	chr15	82114641	417.944	22.7112	4.20183	0.00740809	ADAMTSL3	NM_207517	INSIDE
chr3:010337150-010337194	A_17_P02055177	chr3	10337150	441.39	42.3095	3.383	0.00740975	SEC13L1	NM_030673	INSIDE
chr19:060272564-060272610	A_17_P11001480	chr19	60272564	737.703	40.1496	4.19958	0.00741263	RDH13	NM_138412	INSIDE
chr17:036192446-036192505	A_17_P10320490	chr17	36192446	302.109	16.4444	4.1994	0.00741326	KRT25C	NM_181537	PROMOTER
chr6:007488648-007488707	A_17_P04535912	chr6	7488648	181.226	17.3816	3.38215	0.00741338	DSP	NM_001008844	INSIDE
chr19:056222153-056222207	A_17_P10991548	chr19	56222153	587.181	31.9782	4.19865	0.00741457	KLK11	NM_144947	INSIDE
chr1:163675449-163675504	A_17_P00574716	chr1	163675449	253.733	24.3445	3.38165	0.00741519	C1orf32	NM_199351	INSIDE
chr19:007644183-007644235	A_17_P10873631	chr19	7644183	355.66	19.3724	4.19842	0.00741519	MCEMP1	NM_174918	PROMOTER
chrY:022792786-022792845	A_17_P15002353	chrY	22792786	10.655	0.492727	4.4346	0.0074153	RBMY1F	NM_152585	PROMOTER
chr4:024709513-024709563	A_17_P02988800	chr4	24709513	1253.34	120.317	3.38087	0.00741813	LGI2	NM_018176	PROMOTER
chr20:022978610-022978665	A_17_P17180022	chr20	22978610	253.133	13.8188	4.19519	0.00742211	THBD	NM_000361	PROMOTER
chr1:150047498-150047549	A_17_P00515441	chr1	150047498	2041.47	196.151	3.37957	0.00742327	LOR	NM_000427	INSIDE
chr19:056233280-056233339	A_17_P10991609	chr19	56233280	197.773	10.8079	4.19369	0.00742558	KLK12	NM_145895	PROMOTER
chr11:006842068-006842127	A_17_P07620857	chr11	6842068	137.696	7.52384	4.19387	0.00742571	OR10A2	NM_001004460	PROMOTER
chr19:014649202-014649261	A_17_P10893015	chr19	14649202	197.125	10.7952	4.19066	0.00743173	EMR3	NM_152939	PROMOTER
chr12:054153809-054153868	A_17_P08369263	chr12	54153809	100.133	5.49269	4.18826	0.00743752	OR6C70	NM_001005499	PROMOTER
chr15:094670906-094670962	A_17_P09853709	chr15	94670906	273.829	15.0349	4.18688	0.00743931	NR2F2	NM_021005	PROMOTER
chr12:052662119-052662176	A_17_P08362264	chr12	52662119	395.537	21.7268	4.18627	0.0074404	HOXC10	NM_017409	PROMOTER
chr15:058083579-058083631	A_17_P09691668	chr15	58083579	579.484	31.8335	4.18615	0.00744055	FOXB1	NM_012182	PROMOTER
chr4:107175307-107175351	A_17_P03325526	chr4	107175307	220.971	21.3003	3.37492	0.00744188	NPNT	NM_001033047	INSIDE
chr9:123848885-123848943	A_17_P06954305	chr9	123848885	2223.68	214.489	3.37398	0.00744547	LHX2	NM_004789	PROMOTER
chr14:093828119-093828173	A_17_P09484317	chr14	93828119	425.727	23.4305	4.18347	0.00744628	SERPINA10	NM_016186	INSIDE
chr3:123223501-123223545	A_17_P02545840	chr3	123223501	179.84	17.3488	3.37381	0.00744632	ILDR1	NM_175924	INSIDE
chr3:100839091-100839150	A_17_P02444191	chr3	100839091	482.565	46.5554	3.3737	0.0074466	COL8A1	NM_001850	PROMOTER
chr2:102261460-102261519	A_17_P01366411	chr2	102261460	111.488	10.7568	3.37357	0.00744985	IL1RL2	NM_003854	PROMOTER
chr19:001217711-001217755	A_17_P17094175	chr19	1217711	195.595	10.7825	4.18111	0.00745181	C19orf23	NM_152480	DOWNSTREAM
chrX:150537773-150537832	A_17_P12027721	chrX	150537773	195.595	10.7825	4.18111	0.00745208	PRRG3	NM_024082	INSIDE
chrX:142446718-142446777	A_17_P12000558	chrX	142446718	321.344	17.738	4.17921	0.00745529	SLITRK4	NM_173078	INSIDE
chr6:109881909-109881953	A_17_P04977019	chr6	109881909	61.5533	5.94607	3.37183	0.00745577	MICAL1	NM_022765	INSIDE
chr7:026944986-026945045	A_17_P05377803	chr7	26944986	458.174	44.2757	3.37131	0.0074562	HOXA4	NM_002141	PROMOTER
chr9:101581894-101581953	A_17_P06856741	chr9	101581894	504.999	48.808	3.37109	0.00745704	GRIN3A	NM_133445	PROMOTER
chr4:167153902-167153951	A_17_P15635433	chr4	167153902	602.131	58.2066	3.37082	0.0074581	TLL1	NM_012464	INSIDE
chr20:021636426-021636474	A_17_P11111559	chr20	21636426	701.988	38.7884	4.17775	0.00745819	PAX1	NM_006192	INSIDE
chr2:073056754-073056798	A_17_P15255667	chr2	73056754	67.6187	6.53665	3.3708	0.00745915	EMX1	NM_004097	INSIDE
chr7:027000969-027001013	A_17_P15920264	chr7	27000969	786.504	76.0581	3.37028	0.00746026	HOXA11	NM_005523	PROMOTER
chr2:119323064-119323122	A_17_P01432350	chr2	119323064	1472.69	142.466	3.36976	0.00746234	EN1	NM_001426	PROMOTER
chr17:010363965-010364024	A_17_P10226878	chr17	10363965	218.61	12.0969	4.17565	0.00746308	MYH1	NM_005963	PROMOTER
chr9:123849937-123849996	A_17_P06954316	chr9	123849937	1051.03	101.71	3.36927	0.0074643	LHX2	NM_004789	PROMOTER
chr7:027017175-027017224	A_17_P05378389	chr7	27017175	2903.53	280.986	3.36924	0.00746443	HOXA13	NM_000522	PROMOTER
chr3:099556119-099556178	A_17_P02439166	chr3	99556119	145.674	14.1	3.36898	0.00746584	OR5K4	NM_001005517	INSIDE
chr3:188875745-188875803	A_17_P02839477	chr3	188875745	275.081	26.6321	3.36862	0.00746699	SST	NM_001048	PROMOTER
chrX:100680794-100680853	A_17_P11852841	chrX	100680794	151.471	8.39103	4.17405	0.00746736	ARMCX6-ARMCX3	NM_019007-NM_016607	DIVERGENT_PROMOTER
chr1:087509804-087509848	A_17_P00355709	chr1	87509804	184.011	17.8182	3.36837	0.00746819	LMO4	NM_006769	INSIDE
chr4:175817358-175817417	A_17_P15639869	chr4	175817358	101.97	9.87542	3.36816	0.00746958	HPGD	NM_000860	INSIDE
chr17:032363740-032363787	A_17_P10305317	chr17	32363740	483.883	26.8831	4.16989	0.00747487	LHX1	NM_005568	PROMOTER
chr7:026936549-026936602	A_17_P05377734	chr7	26936549	3174.34	307.774	3.36651	0.00747536	HOXA3	NM_030661	PROMOTER
chr12:052672030-052672075	A_17_P08362355	chr12	52672030	403.689	22.4381	4.16922	0.00747634	HOXC9	NM_006897	PROMOTER
chr7:019584986-019585045	A_17_P05343699	chr7	19584986	188.791	18.3086	3.3662	0.00747722	MGC42090	NM_152774	INSIDE
chr12:007796825-007796884	A_17_P08181019	chr12	7796825	268.625	14.9409	4.16825	0.00747852	CLEC4C	NM_203503	PROMOTER
chr7:154745868-154745912	A_17_P05887735	chr7	154745868	913.289	88.5985	3.36572	0.00747856	EN2	NM_001427	PROMOTER
chr1:224500667-224500711	A_17_P15188219	chr1	224500667	525.13	50.9474	3.36559	0.00747907	WNT3A	NM_033131	PROMOTER
chr6:027324766-027324817	A_17_P04627961	chr6	27324766	2000.84	194.164	3.36526	0.00748041	PRSS16	NM_005865	INSIDE
chr1:110927874-110927927	A_17_P00455557	chr1	110927874	741.11	71.9219	3.36519	0.00748071	KCNA3	NM_002232	INSIDE
chr6:007485717-007485776	A_17_P15782050	chr6	7485717	129.264	12.5441	3.36524	0.00748116	DSP	NM_001008844	PROMOTER
chr1:119243473-119243532	A_17_P00489887	chr1	119243473	282.401	27.4212	3.36438	0.00748403	TBX15	NM_152380	INSIDE
chr2:031719728-031719787	A_17_P01084518	chr2	31719728	309.817	30.0855	3.36428	0.00748441	SRD5A2	NM_000348	PROMOTER
chr12:060870390-060870449	A_17_P08397936	chr12	60870390	167.54	9.3351	4.16569	0.00748493	FAM19A2	NM_178539	INSIDE
chr16:078189858-078189917	A_17_P10138131	chr16	78189858	224.907	12.5585	4.16259	0.00749082	MAF	NM_001031804	INSIDE
chr4:164609760-164609819	A_17_P15633507	chr4	164609760	657.425	63.9153	3.36259	0.00749116	NPY1R	NM_000909	INSIDE
chr4:011108959-011109018	A_17_P02927652	chr4	11108959	141.64	13.7726	3.36236	0.00749253	HS3ST1	NM_005114	PROMOTER
chr7:026907836-026907891	A_17_P05377507	chr7	26907836	3990.12	388.628	3.35997	0.00750176	HOXA1	NM_005522	INSIDE
chr6:001333833-001333880	A_17_P04506766	chr6	1333833	2276.21	221.732	3.35975	0.00750267	FOXF2	NM_001452	PROMOTER
chr2:224728007-224728066	A_17_P01924797	chr2	224728007	90.0884	8.77472	3.35992	0.00750358	SERPINE2	NM_006216	INSIDE
chr7:049591628-049591683	A_17_P05479497	chr7	49591628	1199.62	116.929	3.35888	0.0075062	UNQ739	NM_198570	INSIDE
chr6:160739941-160739985	A_17_P05212262	chr6	160739941	198.471	19.348	3.35867	0.00750722	SLC22A3	NM_021977	INSIDE
chr6:033190661-033190720	A_17_P04649738	chr6	33190661	224.089	21.8484	3.35847	0.00750805	BC017967	NONE	Unknown
chr4:164753011-164753070	A_17_P03584537	chr4	164753011	92.8111	9.05064	3.3582	0.00750978	TKTL2	NM_032136	PROMOTER
chr7:026943565-026943624	A_17_P05377791	chr7	26943565	450.704	43.9889	3.35697	0.00751398	HOXA4	NM_002141	INSIDE
chr8:023770628-023770687	A_17_P06012307	chr8	23770628	177.061	17.2822	3.35689	0.00751447	STC1	NM_003155	PROMOTER
chr7:027014301-027014350	A_17_P05378361	chr7	27014301	2731.8	266.658	3.35679	0.00751468	HOXA13	NM_000522	PROMOTER
chr11:000737474-000737518	A_17_P07595885	chr11	737474	49.983	2.80595	4.15487	0.00751535	TALDO1	NM_006755	INSIDE
chr5:003650159-003650218	A_17_P03726006	chr5	3650159	449.955	43.96	3.35552	0.00751991	IRX1	NM_024337	INSIDE
chr2:222990646-222990696	A_17_P01917036	chr2	222990646	2079.71	203.204	3.35538	0.0075204	PAX3	NM_013942	PROMOTER
chr4:041590463-041590520	A_17_P03062878	chr4	41590463	405.602	39.6497	3.35468	0.00752328	PHOX2B	NM_003924	INSIDE
chr4:072569752-072569809	A_17_P03173118	chr4	72569752	140.798	13.7644	3.35462	0.00752393	SLC4A4	NM_003759	PROMOTER
chr19:047039870-047039920	A_17_P10965719	chr19	47039870	393.159	22.22	4.14518	0.00752816	LYPD4	NM_173506	INSIDE
chr10:007748109-007748168	A_17_P16289398	chr10	7748109	143.975	14.0858	3.35351	0.0075285	ITIH5	NM_001001851	INSIDE
chr6:133080449-133080493	A_17_P05085030	chr6	133080449	542.036	53.0407	3.35322	0.00752927	VNN1	NM_004666	PROMOTER
chr6:007673826-007673881	A_17_P04536912	chr6	7673826	383.671	37.5452	3.35317	0.00752947	BMP6	NM_001718	INSIDE
chr12:045761978-045762037	A_17_P08331970	chr12	45761978	212.454	12.0132	4.14447	0.00752991	AMIGO2	NM_181847	PROMOTER
chr10:124896159-124896203	A_17_P07539321	chr10	124896159	230.305	13.023	4.14441	0.00753044	HMX2	NM_005519	PROMOTER
chr3:145054231-145054290	A_17_P15496545	chr3	145054231	158.668	15.5293	3.35295	0.00753056	SLC9A9	NM_173653	PROMOTER
chr1:166286597-166286656	A_17_P00586640	chr1	166286597	162.773	15.9332	3.35276	0.00753135	F5	NM_000130	INSIDE
chr9:068667120-068667179	A_17_P06715032	chr9	68667120	162.773	15.9332	3.35276	0.00753146	PIP5K1B	NM_001031687	INSIDE
chr21:042013208-042013252	A_17_P11399717	chr21	42013208	189.456	10.7307	4.14205	0.00753553	C21orf129	NM_152506	PROMOTER
chr10:026262603-026262648	A_17_P07138333	chr10	26262603	470.557	46.0954	3.35167	0.0075356	MYO3A	NM_017433	PROMOTER
chr10:103989246-103989305	A_17_P07437619	chr10	103989246	261.154	14.7959	4.14164	0.00753605	PITX3	NM_005029	INSIDE
chr14:020495679-020495738	A_17_P09156501	chr14	20495679	308.691	17.4932	4.14129	0.00753668	RNASE2	NM_002934	DOWNSTREAM
chr7:026955880-026955930	A_17_P05377901	chr7	26955880	1088.52	106.658	3.35131	0.00753705	HOXA5	NM_019102	INSIDE
chrX:152281306-152281350	A_17_P17414202	chrX	152281306	158.662	8.99556	4.1406	0.00753882	BGN	NM_001711	INSIDE
chr6:136913149-136913193	A_17_P15865384	chr6	136913149	60.6021	5.94039	3.35074	0.00754095	MAP7	NM_003980	INSIDE
chr12:052668182-052668231	A_17_P08362320	chr12	52668182	389.472	22.1428	4.13661	0.00754688	HOXC10	NM_017409	INSIDE
chr18:017999365-017999421	A_17_P10565434	chr18	17999365	654.409	37.2152	4.13623	0.00754758	GATA6	NM_005257	PROMOTER
chrX:082570044-082570100	A_17_P11806413	chrX	82570044	195.527	11.1199	4.13615	0.00754832	POU3F4	NM_000307	INSIDE
chr19:059259114-059259173	A_17_P10998955	chr19	59259114	332.534	18.9214	4.13541	0.00754966	UNQ3033	NM_198481	PROMOTER
chr2:173425089-173425148	A_17_P01678307	chr2	173425089	208.191	20.4476	3.34791	0.0075512	RAPGEF4	NM_007023	PROMOTER
chr2:222993429-222993488	A_17_P01917061	chr2	222993429	1198.89	117.762	3.34775	0.00755166	PAX3	NM_013942	PROMOTER
chr3:013896893-013896937	A_17_P02070806	chr3	13896893	106.302	10.4419	3.34771	0.00755272	WNT7A	NM_004625	PROMOTER
chr6:033189277-033189329	A_17_P04649728	chr6	33189277	658.995	64.7653	3.34697	0.00755486	BC017967	NONE	Unknown
chr14:060186720-060186776	A_17_P09330718	chr14	60186720	616.762	35.1554	4.1329	0.00755492	SIX1	NM_005982	PROMOTER
chr2:176784183-176784236	A_17_P01695077	chr2	176784183	72.1095	7.08645	3.34705	0.00755528	HOXD13	NM_000523	INSIDE
chr5:054563923-054563967	A_17_P03937909	chr5	54563923	268.087	26.3608	3.34623	0.00755808	UNG2	NM_001024592	INSIDE
chr6:125342766-125342825	A_17_P05046417	chr6	125342766	170.548	16.7782	3.34552	0.00756109	IBRDC1	NM_152553	PROMOTER
chr1:044549272-044549323	A_17_P00171654	chr1	44549272	1504.72	148.041	3.34543	0.00756119	C1orf164	NM_018150	INSIDE
chr10:102980856-102980910	A_17_P07432665	chr10	102980856	666.998	38.1418	4.12824	0.0075652	LBX1	NM_006562	PROMOTER
chr1:188859992-188860051	A_17_P00686729	chr1	188859992	118.157	11.637	3.34391	0.00756821	RGS18	NM_130782	INSIDE
chr1:032383137-032383181	A_17_P00122041	chr1	32383137	259.007	25.5071	3.34402	0.00756925	C1orf90	NM_032648	INSIDE
chr1:001151745-001151789	A_17_P00001172	chr1	1151745	302.381	29.7936	3.34329	0.00757012	TTLL10	NM_153254	PROMOTER
chr7:026908725-026908776	A_17_P05377515	chr7	26908725	2361.58	232.705	3.34318	0.0075705	HOXA1	NM_005522	INSIDE
chr1:092664696-092664751	A_17_P00378194	chr1	92664696	511.887	50.4467	3.34299	0.00757129	GFI1	NM_005263	PROMOTER
chr7:114151287-114151346	A_17_P05709046	chr7	114151287	195.327	19.2497	3.34299	0.00757151	MDFIC	NM_199072	PROMOTER
chr5:139472845-139472893	A_17_P04321837	chr5	139472845	250.642	24.7045	3.34278	0.00757225	PURA	NM_005859	PROMOTER
chr5:145700152-145700202	A_17_P04349893	chr5	145700152	339.435	33.4585	3.34269	0.00757258	POU4F3	NM_002700	INSIDE
chr7:026988477-026988521	A_17_P05378156	chr7	26988477	1491.14	147.002	3.3425	0.00757329	HOXA10	NM_018951	PROMOTER
chr9:126452064-126452108	A_17_P06965574	chr9	126452064	872.42	86.0165	3.34234	0.00757398	LMX1B	NM_002316	PROMOTER
chr8:068818914-068818973	A_17_P16103113	chr8	68818914	284.139	28.018	3.34217	0.00757477	CPA6	NM_020361	INSIDE
chr13:083354710-083354769	A_17_P09001974	chr13	83354710	429.033	24.6158	4.12343	0.00757596	SLITRK1	NM_052910	PROMOTER
chr1:149830239-149830298	A_17_P00514676	chr1	149830239	97.3277	9.59902	3.34189	0.00757661	SPRR2D	NM_006945	PROMOTER
chr11:004424236-004424295	A_17_P07609883	chr11	4424236	368.747	21.1798	4.12187	0.00757967	OR52K2	NM_001005172	PROMOTER
chr10:101283804-101283851	A_17_P07424843	chr10	101283804	1195.69	68.7206	4.12095	0.00758134	NKX2-3	NM_145285	INSIDE
chr1:092661786-092661830	A_17_P15085678	chr1	92661786	6111.19	603.756	3.33942	0.00758609	GFI1	NM_005263	INSIDE
chr19:040414696-040414741	A_17_P10946973	chr19	40414696	506.2	29.1426	4.1185	0.00758691	FLJ25660	NM_152481	PROMOTER
chr5:003647203-003647249	A_17_P03725994	chr5	3647203	4874.84	481.696	3.33916	0.00758716	IRX1	NM_024337	PROMOTER
chr7:155106041-155106093	A_17_P05889795	chr7	155106041	3311.81	327.251	3.33915	0.0075872	SHH	NM_000193	PROMOTER
chr12:033482734-033482785	A_17_P08289896	chr12	33482734	277.69	15.9891	4.11832	0.00758752	SYT10	NM_198992	INSIDE
chr5:134401706-134401750	A_17_P04297792	chr5	134401706	1536.92	151.922	3.33864	0.00758934	PITX1	NM_002653	PROMOTER
chr17:033180258-033180310	A_17_P10309315	chr17	33180258	234.051	13.4885	4.11702	0.00759043	TCF2	NM_006481	PROMOTER
chr7:020600098-020600145	A_17_P05348467	chr7	20600098	2230.45	220.531	3.33828	0.00759083	SP8	NM_198956	PROMOTER
chr1:002378997-002379043	A_17_P00004843	chr1	2378997	377.099	37.2873	3.33819	0.00759127	PEX10	NM_153818	PROMOTER
chr7:026984068-026984127	A_17_P05378126	chr7	26984068	366.706	36.2756	3.33755	0.00759394	HOXA10	NM_018951	INSIDE
chr3:123281808-123281867	A_17_P02546057	chr3	123281808	160.548	15.8878	3.33701	0.00759661	CD86	NM_006889	INSIDE
chrX:144611619-144611673	A_17_P12006313	chrX	144611619	440.19	25.4208	4.11405	0.00759687	SLITRK2	NM_032539	INSIDE
chrX:024795586-024795630	A_17_P11648974	chrX	24795586	440.19	25.4208	4.11405	0.00759691	ARX	NM_139058	PROMOTER
chr10:005407332-005407391	A_17_P07043081	chr10	5407332	135.791	13.4398	3.3368	0.00759728	UCN3	NM_053049	DOWNSTREAM
chr12:052648427-052648481	A_17_P08362142	chr12	52648427	1849.32	106.83	4.11361	0.00759775	HOXC11	NM_014212	PROMOTER
chr6:001329813-001329866	A_17_P04506729	chr6	1329813	2022.34	200.233	3.33628	0.00759917	FOXF2	NM_001452	PROMOTER
chr7:031157391-031157450	A_17_P05399048	chr7	31157391	105.404	10.4361	3.33627	0.00759971	NEUROD6	NM_022728	PROMOTER
chr9:023820814-023820873	A_17_P06649304	chr9	23820814	77.3357	7.6614	3.33546	0.0076033	ELAVL2	NM_004432	PROMOTER
chr4:155770455-155770511	A_17_P03543079	chr4	155770455	225.475	22.3395	3.33529	0.00760347	DCHS2	NM_199348	PROMOTER
chr2:124497702-124497761	A_17_P01454425	chr2	124497702	111.33	11.0348	3.33471	0.00760656	CNTNAP5	NM_130773	PROMOTER
chr13:019617537-019617596	A_17_P08707341	chr13	19617537	437.588	25.3663	4.10859	0.0076092	GJA3	NM_021954	PROMOTER
chr6:028033717-028033773	A_17_P04630677	chr6	28033717	326.464	32.3787	3.33381	0.00760957	OR2B6	NM_012367	INSIDE
chr4:147919329-147919373	A_17_P03505536	chr4	147919329	289.815	28.7606	3.33296	0.0076131	POU4F2	NM_004575	INSIDE
chr5:100265597-100265654	A_17_P04142837	chr5	100265597	997.647	99.0102	3.33288	0.00761336	ST8SIA4	NM_175052	INSIDE
chrX:106823465-106823524	A_17_P11873833	chrX	106823465	635.147	36.8702	4.10656	0.0076137	TSC22D3	NM_198057	INSIDE
chr4:187851087-187851146	A_17_P03693118	chr4	187851087	193.369	19.1964	3.33245	0.00761539	MTNR1A	NM_005958	INSIDE
chr2:119325863-119325922	A_17_P01432376	chr2	119325863	1092.01	108.431	3.33213	0.0076165	EN1	NM_001426	PROMOTER
chr15:058081526-058081570	A_17_P09691652	chr15	58081526	348.268	20.2344	4.10532	0.0076167	FOXB1	NM_012182	PROMOTER
chr7:015502168-015502227	A_17_P05323206	chr7	15502168	272.05	27.0171	3.33192	0.00761751	MEOX2	NM_005924	PROMOTER
chr13:027969782-027969840	A_17_P08743820	chr13	27969782	262.576	15.2594	4.10497	0.00761761	FLT1	NM_002019	PROMOTER
chr12:052615335-052615394	A_17_P08361885	chr12	52615335	1867.02	108.576	4.10396	0.00761953	HOXC13	NM_017410	PROMOTER
chr21:044483305-044483352	A_17_P11411417	chr21	44483305	1384.62	80.531	4.1038	0.0076199	ICOSLG	NM_015259	INSIDE
chr20:052222461-052222520	A_17_P11221013	chr20	52222461	597.689	34.784	4.1029	0.00762202	CYP24A1	NM_000782	INSIDE
chr6:031476523-031476569	A_17_P04643286	chr6	31476523	4148.62	412.416	3.33046	0.0076235	MICA	NM_000247	PROMOTER
chr9:101581430-101581488	A_17_P06856735	chr9	101581430	459.453	45.6749	3.33044	0.00762361	GRIN3A	NM_133445	PROMOTER
chr6:101016817-101016876	A_17_P04935910	chr6	101016817	68.4487	6.80437	3.33049	0.00762509	SIM1	NM_005068	INSIDE
chr20:044957810-044957869	A_17_P11192899	chr20	44957810	546.572	31.8407	4.10147	0.00762529	EYA2	NM_005244	INSIDE
chr1:154551780-154551839	A_17_P00533908	chr1	154551780	263.069	26.1604	3.32998	0.00762563	FCRL2	NM_138738	PROMOTER
chr5:094752284-094752343	A_17_P04118618	chr5	94752284	187.499	18.6481	3.32978	0.00762656	FAM81B	NM_152548	PROMOTER
chr3:140149297-140149343	A_17_P02617859	chr3	140149297	2234.26	222.275	3.32938	0.00762803	FOXL2	NM_023067	PROMOTER
chrX:118525105-118525164	A_17_P11915402	chrX	118525105	176.761	10.3091	4.09981	0.00762998	NKRF	NM_017544	PROMOTER
chr19:040717701-040717755	A_17_P10948041	chr19	40717701	971.416	56.675	4.0993	0.00763013	GAPDHS	NM_014364	INSIDE
chr7:142657035-142657089	A_17_P05840591	chr7	142657035	599.33	59.6474	3.32882	0.00763041	TAS2R60	NM_177437	PROMOTER
chr2:060696775-060696834	A_17_P01220238	chr2	60696775	96.4019	9.59524	3.32867	0.00763183	BCL11A	NM_022893	PROMOTER
chr9:123850046-123850105	A_17_P06954317	chr9	123850046	1982.86	197.401	3.32838	0.00763224	LHX2	NM_004789	PROMOTER
chr12:129174688-129174747	A_17_P08691823	chr12	129174688	229.681	13.4099	4.09826	0.00763288	FZD10	NM_007197	INSIDE
chr16:085165482-085165541	A_17_P10170721	chr16	85165482	594.679	34.7246	4.09808	0.00763297	FOXL1	NM_005250	PROMOTER
chr11:117642601-117642660	A_17_P08063017	chr11	117642601	239.045	13.9775	4.0961	0.00763798	EVA1	NM_144765	PROMOTER
chr6:117691950-117692009	A_17_P05011579	chr6	117691950	278.897	27.7952	3.32683	0.00763896	VGLL2	NM_153453	PROMOTER
chr16:085168277-085168327	A_17_P10170738	chr16	85168277	526.499	30.8064	4.09513	0.00763974	FOXL1	NM_005250	PROMOTER
chr16:085099533-085099577	A_17_P10170299	chr16	85099533	400.555	23.4575	4.09388	0.00764271	FOXF1	NM_001451	PROMOTER
chr13:052322574-052322621	A_17_P08855158	chr13	52322574	270.401	15.8431	4.09317	0.00764439	PCDH8	NM_032949	PROMOTER
chr7:126854545-126854601	A_17_P05769341	chr7	126854545	371.31	37.058	3.32477	0.00764756	PAX4	NM_006193	PROMOTER
chr5:134898201-134898254	A_17_P04300597	chr5	134898201	332.408	33.1791	3.32461	0.00764828	NEUROG1	NM_006161	INSIDE
chr2:172777693-172777750	A_17_P01675451	chr2	172777693	1641.68	163.869	3.32456	0.00764838	DLX1	NM_001038493	INSIDE
chr10:026547195-026547239	A_17_P16302637	chr10	26547195	154.82	15.4631	3.32369	0.00765234	GAD2	NM_000818	INSIDE
chr5:002807978-002808022	A_17_P03721129	chr5	2807978	331.966	33.1615	3.32346	0.0076531	CEI	NM_178569	INSIDE
chr9:093799412-093799465	A_17_P06825063	chr9	93799412	3938.02	393.446	3.32323	0.007654	BARX1	NM_021570	PROMOTER
LACC:GD36C_17_3	LACC:GD36C_17_3	NONE	NONE	122.327	12.2213	3.32328	0.00765426	LACC:GD36C_17_3	NONE	NONE
chr14:056343561-056343620	A_17_P09313570	chr14	56343561	227.172	13.3643	4.08733	0.00765811	OTX2	NM_172337	PROMOTER
chr8:024296581-024296640	A_17_P06014801	chr8	24296581	128.232	12.8205	3.32223	0.00765862	ADAMDEC1	NM_014479	PROMOTER
chr6:032923479-032923538	A_17_P15802728	chr6	32923479	128.232	12.8205	3.32223	0.00765874	TAP1	NM_000593	INSIDE
chr3:194439199-194439258	A_17_P02866234	chr3	194439199	260.54	26.0594	3.32163	0.00766093	HRASLS	NM_020386	PROMOTER
chr4:085775013-085775057	A_17_P03231410	chr4	85775013	359.592	35.9887	3.32074	0.00766463	NKX6-1	NM_006168	INSIDE
chr17:030594682-030594732	A_17_P10299785	chr17	30594682	689.949	40.7015	4.08334	0.00766684	MGC19764	NM_144975	INSIDE
chr21:035181539-035181598	A_17_P11366336	chr21	35181539	367.009	21.667	4.08224	0.00766949	RUNX1	NM_001001890	INSIDE
chr7:141132074-141132133	A_17_P05834160	chr7	141132074	180.682	18.1009	3.31932	0.0076709	TAS2R38	NM_176817	PROMOTER
chr1:202269217-202269270	A_17_P00747940	chr1	202269217	1272.37	127.475	3.31924	0.00767097	MFSD4	NM_181644	PROMOTER
chr19:009979912-009979964	A_17_P10880013	chr19	9979912	635.056	37.5314	4.08071	0.00767288	COL5A3	NM_015719	INSIDE
chr4:109445930-109445981	A_17_P03335748	chr4	109445930	236.198	23.6719	3.31875	0.00767331	LEF1	NM_016269	INSIDE
chr14:020284832-020284891	A_17_P09155956	chr14	20284832	208.033	12.3154	4.07828	0.00767912	FAM12A	NM_006683	INSIDE
chr5:177360363-177360422	A_17_P04488635	chr5	177360363	243.323	24.412	3.31721	0.00767973	PROP1	NM_006261	PROMOTER
chr2:113750906-113750950	A_17_P01409479	chr2	113750906	302.21	30.3233	3.31705	0.00768038	PAX8	NM_003466	INSIDE
chr9:021787722-021787771	A_17_P06640347	chr9	21787722	213.827	21.4659	3.31632	0.00768355	MTAP	NM_002451	PROMOTER
chr7:017843735-017843794	A_17_P05334379	chr7	17843735	130.705	13.1211	3.31635	0.00768393	PRPS1L1	NM_175886	PROMOTER
chr3:191715438-191715497	A_17_P02854355	chr3	191715438	757.812	76.0829	3.3162	0.00768396	IL1RAP	NM_134470	INSIDE
chr4:048823902-048823960	A_17_P03094265	chr4	48823902	227.893	22.8835	3.31597	0.00768508	FLJ21511	NM_025087	PROMOTER
chr17:044160341-044160385	A_17_P10350913	chr17	44160341	2701.15	160.265	4.07504	0.00768604	HOXB13	NM_006361	INSIDE
chr12:005471777-005471836	A_17_P08171418	chr12	5471777	421.853	25.0324	4.07487	0.00768653	NTF3	NM_002527	PROMOTER
chr10:023522221-023522265	A_17_P16301097	chr10	23522221	235.121	23.6293	3.31476	0.00769023	PTF1A	NM_178161	INSIDE
chr2:119327334-119327386	A_17_P01432388	chr2	119327334	1847.91	185.757	3.31441	0.00769158	EN1	NM_001426	PROMOTER
chr8:107740232-107740291	A_17_P06364009	chr8	107740232	292.082	29.3753	3.3137	0.00769472	OXR1	NM_181354	INSIDE
chr17:008863863-008863922	A_17_P10220382	chr17	8863863	243.229	14.4678	4.0714	0.00769491	NTN1	NM_004822	PROMOTER
chr4:000981988-000982032	A_17_P15531954	chr4	981988	3477.48	349.772	3.31356	0.00769522	SLC26A1	NM_213613	PROMOTER
chr3:138967817-138967876	A_17_P02613100	chr3	138967817	376.269	37.8619	3.31294	0.00769793	SOX14	NM_004189	DOWNSTREAM
chr5:134942231-134942275	A_17_P04300910	chr5	134942231	127.346	12.8155	3.3128	0.00769885	CXCL14	NM_004887	INSIDE
chr6:047117683-047117742	A_17_P04714858	chr6	47117683	165.523	16.6638	3.31224	0.00770116	GPR110	NM_025048	INSIDE
chr17:036810304-036810359	A_17_P10322421	chr17	36810304	389.91	23.2426	4.0683	0.007702	KRTHA1	NM_002277	PROMOTER
chr2:227852587-227852646	A_17_P01940471	chr2	227852587	189.436	19.0882	3.31096	0.00770652	COL4A4	NM_000092	INSIDE
chr20:001588791-001588850	A_17_P11018694	chr20	1588791	92.5964	5.50778	4.07141	0.00770731	SIRPB2	NM_080816	PROMOTER
chr2:027397974-027398021	A_17_P01063266	chr2	27397974	764.847	77.0828	3.31069	0.00770758	SLC30A3	NM_003459	PROMOTER
chr21:041460400-041460459	A_17_P11397236	chr21	41460400	284.872	17.0252	4.06457	0.00771083	BACE2	NM_012105	PROMOTER
chr13:019665507-019665566	A_17_P08707621	chr13	19665507	320.697	19.1708	4.06423	0.00771163	GJB2	NM_004004	PROMOTER
chr12:051051677-051051736	A_17_P08353992	chr12	51051677	241.418	14.4335	4.06404	0.00771245	KRTHB5	NM_002283	PROMOTER
chr5:002806399-002806443	A_17_P03721116	chr5	2806399	1886.47	190.51	3.30775	0.00772022	CEI	NM_178569	INSIDE
chr8:065657955-065658014	A_17_P16101394	chr8	65657955	112.069	11.3189	3.30759	0.00772162	BHLHB5	NM_152414	INSIDE
chr6:096571435-096571494	A_17_P04913646	chr6	96571435	194.025	19.598	3.30747	0.00772167	FUT9	NM_006581	INSIDE
chr19:049726779-049726831	A_17_P10972195	chr19	49726779	1083.51	64.9972	4.05919	0.00772334	CEACAM20	NM_198444	PROMOTER
chr9:101372166-101372212	A_17_P06855465	chr9	101372166	58.697	5.92876	3.30748	0.00772354	RNF20	NM_019592	PROMOTER
chr6:138468296-138468355	A_17_P05111462	chr6	138468296	491.853	49.712	3.30656	0.0077254	PERP	NM_022121	INSIDE
chr13:078073551-078073598	A_17_P08978647	chr13	78073551	414.582	24.8925	4.05787	0.0077266	POU4F1	NM_006237	INSIDE
chr2:113312318-113312363	A_17_P01407364	chr2	113312318	373.39	37.7461	3.30628	0.00772663	IL1B	NM_000576	PROMOTER
chr8:057191524-057191583	A_17_P06136008	chr8	57191524	240.159	24.2839	3.30592	0.00772831	MOS	NM_005372	PROMOTER
chr1:018705695-018705741	A_17_P15033936	chr1	18705695	2683.87	271.449	3.30556	0.00772969	PAX7	NM_002584	INSIDE
chr12:113303988-113304047	A_17_P16593904	chr12	113303988	260.062	15.6424	4.05532	0.0077329	TBX5	NM_080718	INSIDE
chr1:114409459-114409503	A_17_P00470051	chr1	114409459	4183.47	423.362	3.30474	0.00773327	SYT6	NM_205848	PROMOTER
chr17:044158766-044158825	A_17_P10350898	chr17	44158766	441.516	26.6106	4.05239	0.00773972	HOXB13	NM_006361	INSIDE
chr8:118211871-118211930	A_17_P06413501	chr8	118211871	126.46	12.8103	3.3033	0.00773991	SLC30A8	NM_173851	PROMOTER
chr17:044058015-044058059	A_17_P10350493	chr17	44058015	599.785	36.163	4.05186	0.00774089	HOXB9	NM_024017	INSIDE
chr8:065656607-065656651	A_17_P16101387	chr8	65656607	120.542	12.2115	3.30323	0.00774119	BHLHB5	NM_152414	INSIDE
chr11:074121033-074121092	A_17_P16473992	chr11	74121033	328.816	19.8303	4.0515	0.00774202	CHRDL2	NM_015424	PROMOTER
chr9:114348245-114348304	A_17_P06912173	chr9	114348245	217.517	22.0465	3.30251	0.00774301	DFNB31	NM_015404	PROMOTER
chr6:050790599-050790643	A_17_P04731244	chr6	50790599	155.952	15.8078	3.3024	0.00774375	TFAP2D	NM_172238	INSIDE
chr2:222993778-222993824	A_17_P01917063	chr2	222993778	1641.58	166.416	3.30222	0.00774418	PAX3	NM_013942	PROMOTER
chr14:020179551-020179610	A_17_P09155526	chr14	20179551	328.31	19.8197	4.05005	0.0077454	OR6S1	NM_001001968	INSIDE
chr8:119701851-119701910	A_17_P06421194	chr8	119701851	108.641	11.0179	3.30165	0.00774709	SAMD12	NM_207506	INSIDE
chrX:054718581-054718634	A_17_P11756626	chrX	54718581	202.538	12.2348	4.04913	0.00774772	MAGED2	NM_201222	INSIDE
chr2:162098698-162098742	A_17_P01623175	chr2	162098698	1838.26	186.524	3.3009	0.00774992	TBR1	NM_006593	INSIDE
chr1:087511573-087511632	A_17_P00355725	chr1	87511573	499.216	50.6685	3.3005	0.00775169	LMO4	NM_006769	INSIDE
chr3:088124225-088124284	A_17_P02409519	chr3	88124225	151.738	15.4082	3.29981	0.00775493	HTR1F	NM_000866	DOWNSTREAM
chr7:115759329-115759373	A_17_P05717637	chr7	115759329	2340.22	237.726	3.29928	0.00775702	CAV1	NM_001753	INSIDE
chr8:069511647-069511706	A_17_P06191718	chr8	69511647	43.7996	4.44639	3.30021	0.00775708	C8orf34	NM_052958	PROMOTER
chr12:051337034-051337093	A_17_P08355634	chr12	51337034	201.824	12.226	4.04507	0.0077579	KRT2A	NM_000423	PROMOTER
chr19:059864042-059864091	A_17_P11000841	chr19	59864042	562.829	34.1089	4.04448	0.00775852	LILRB4	NM_006847	PROMOTER
chr1:243905656-243905715	A_17_P00928898	chr1	243905656	716.023	72.7588	3.29881	0.00775906	CIAS1	NM_004895	PROMOTER
chr18:018000556-018000615	A_17_P10565442	chr18	18000556	379.38	23.0086	4.0434	0.00776122	GATA6	NM_005257	PROMOTER
chr12:053178705-053178764	A_17_P08365157	chr12	53178705	217.439	13.2037	4.04159	0.00776611	NCKAP1L	NM_005337	INSIDE
chr10:001024534-001024578	A_17_P16283524	chr10	1024534	52.5129	5.34154	3.29735	0.00776827	GTPBP4	NM_012341	INSIDE
chr6:132954489-132954548	A_17_P05084410	chr6	132954489	155.184	15.7942	3.29651	0.00776942	TAAR5	NM_003967	PROMOTER
chr9:122068211-122068263	A_17_P06946483	chr9	122068211	303.897	30.9316	3.29643	0.00776955	LHX6	NM_014368	INSIDE
chr5:043556297-043556356	A_17_P03904067	chr5	43556297	23.0724	2.34046	3.3013	0.00777078	FLJ32363	NM_198566	PROMOTER
chr9:123849677-123849723	A_17_P06954313	chr9	123849677	899.717	91.6022	3.29602	0.00777127	LHX2	NM_004789	PROMOTER
chr20:059260075-059260125	A_17_P11254096	chr20	59260075	277.613	16.885	4.03926	0.00777161	CDH4	NM_001794	PROMOTER
chr18:068689954-068690013	A_17_P10810724	chr18	68689954	193.36	11.7682	4.03832	0.00777395	NETO1	NM_138966	PROMOTER
chr9:070714828-070714887	A_17_P06724351	chr9	70714828	339.397	34.5878	3.29464	0.00777746	TRPM3	NM_206948	PROMOTER
chr7:029376580-029376624	A_17_P05391154	chr7	29376580	229.707	23.4135	3.29438	0.00777856	LOC222171	NM_175887	PROMOTER
chr16:001069928-001069972	A_17_P09884719	chr16	1069928	376.154	22.9361	4.03563	0.00778002	SSTR5	NM_001053	INSIDE
chr2:172777358-172777408	A_17_P01675450	chr2	172777358	2148.32	219.046	3.2939	0.00778053	DLX1	NM_001038493	INSIDE
chr18:000896227-000896271	A_17_P10502647	chr18	896227	173.833	10.6021	4.03527	0.00778165	ADCYAP1	NM_001117	INSIDE
chr2:113541735-113541781	A_17_P01408367	chr2	113541735	147.34	15.0248	3.29373	0.00778185	IL1F10	NM_173161	PROMOTER
chr4:082304846-082304905	A_17_P03215866	chr4	82304846	150.94	15.3968	3.29328	0.00778361	BMP3	NM_001201	PROMOTER
chr7:154745604-154745652	A_17_P05887733	chr7	154745604	3114.09	317.688	3.29313	0.00778395	EN2	NM_001427	PROMOTER
chr7:026955292-026955337	A_17_P15920137	chr7	26955292	897.009	91.5375	3.29269	0.00778589	HOXA5	NM_019102	INSIDE
chrX:073622747-073622806	A_17_P11791277	chrX	73622747	199.679	12.1996	4.03278	0.00778755	RNF12	NM_183353	PROMOTER
chr12:052649319-052649368	A_17_P08362152	chr12	52649319	809.607	49.5024	4.03165	0.00778954	HOXC11	NM_014212	PROMOTER
chr3:152645568-152645627	A_17_P02676079	chr3	152645568	221.786	22.6457	3.29185	0.00778964	IGSF10	NM_178822	INSIDE
chr7:113158014-113158073	A_17_P05703778	chr7	113158014	69.2792	7.07283	3.29206	0.00779059	PPP1R3A	NM_002711	PROMOTER
chr5:132974490-132974542	A_17_P04291532	chr5	132974490	214.65	21.9392	3.2904	0.00779609	FSTL4	NM_015082	INSIDE
chrX:085208068-085208127	A_17_P11813494	chrX	85208068	214.832	13.1591	4.02908	0.00779639	DACH2	NM_053281	PROMOTER
chr17:044061350-044061407	A_17_P10350521	chr17	44061350	2306.84	141.346	4.02862	0.0077969	HOXB9	NM_024017	PROMOTER
chrX:024797187-024797246	A_17_P11648989	chrX	24797187	223.463	13.6935	4.02847	0.00779784	ARX	NM_139058	PROMOTER
chr12:004702168-004702219	A_17_P08167100	chr12	4702168	252.633	15.4849	4.0281	0.00779855	GALNT8	NM_017417	INSIDE
chr3:142980044-142980088	A_17_P15495410	chr3	142980044	207.851	21.2652	3.28899	0.0078024	GRK7	NM_139209	INSIDE
chr2:200161439-200161487	A_17_P01806062	chr2	200161439	1569.37	160.574	3.28887	0.00780272	FLJ32063	NM_153031	INSIDE
chr9:017571238-017571297	A_17_P06620441	chr9	17571238	170.91	17.4888	3.28873	0.00780355	SH3GL2	NM_003026	INSIDE
chr6:122968172-122968231	A_17_P05034362	chr6	122968172	170.91	17.4888	3.28873	0.00780362	PKIB	NM_032471	PROMOTER
chr5:076975205-076975254	A_17_P04032704	chr5	76975205	2650.51	271.275	3.28844	0.00780461	OTP	NM_032109	PROMOTER
chr21:044840832-044840891	A_17_P11412882	chr21	44840832	599.921	36.8394	4.02545	0.00780471	KRTAP10-6-KRTAP10-7	NM_198688-NM_198689	DIVERGENT_PROMOTER
chr19:012723981-012724025	A_17_P10887206	chr19	12723981	11305.7	694.437	4.02506	0.0078056	VMD2L1	NM_017682	PROMOTER
chr6:117694149-117694205	A_17_P05011592	chr6	117694149	792.276	81.1081	3.28809	0.0078062	VGLL2	NM_182645	INSIDE
chr12:061832235-061832284	A_17_P08402475	chr12	61832235	198.246	12.1818	4.02449	0.00780772	AVPR1A	NM_000706	INSIDE
chr11:031789537-031789587	A_17_P07731812	chr11	31789537	357.689	21.9911	4.02371	0.00780913	PAX6	NM_001604	PROMOTER
chr2:131348532-131348591	A_17_P01479004	chr2	131348532	355.445	36.4135	3.28708	0.0078107	FLJ38377	NM_152698	INSIDE
chr7:117109315-117109374	A_17_P05724906	chr7	117109315	96.3003	9.86497	3.28715	0.00781165	CTTNBP2	NM_033427	PROMOTER
chr19:009981795-009981839	A_17_P10880025	chr19	9981795	1401.5	86.2929	4.02159	0.00781415	COL5A3	NM_015719	INSIDE
chr20:061107391-061107435	A_17_P11263554	chr20	61107391	2190.55	134.95	4.0208	0.00781608	BHLHB4	NM_080606	DOWNSTREAM
chr10:125841563-125841607	A_17_P07544547	chr10	125841563	306.193	18.8672	4.02049	0.00781742	BC027908	NONE	Unknown
chr11:057700947-057701006	A_17_P07816200	chr11	57700947	110.373	6.79513	4.02175	0.00781747	OR9Q1	NM_001005212	INSIDE
chr8:111056032-111056076	A_17_P06380054	chr8	111056032	2713.23	278.325	3.28517	0.00781911	KCNV1	NM_014379	INSIDE
chr3:053856254-053856311	A_17_P02246877	chr3	53856254	220.088	22.5819	3.28484	0.00782067	IL17RB	NM_018725	INSIDE
chr2:024185956-024186007	A_17_P01049554	chr2	24185956	82.6786	8.48164	3.2851	0.00782083	FKBP1B	NM_004116	INSIDE
chr8:086538045-086538089	A_17_P06268759	chr8	86538045	335.799	34.4581	3.28468	0.00782133	CA3	NM_005181	INSIDE
chr19:059443431-059443475	A_17_P10999632	chr19	59443431	17421.1	1076.39	4.01656	0.00782654	LILRB3	NM_006864	PROMOTER
chr8:057399623-057399682	A_17_P06136988	chr8	57399623	118.764	12.2007	3.28306	0.00782897	RDHE2	NM_138969	PROMOTER
chr12:061831710-061831769	A_17_P08402470	chr12	61831710	341.091	21.097	4.01505	0.00783052	AVPR1A	NM_000706	INSIDE
chr6:124168022-124168081	A_17_P05040135	chr6	124168022	189.458	19.47	3.28256	0.00783088	TCBA1	NM_153355	INSIDE
chr7:026935949-026936004	A_17_P05377728	chr7	26935949	2587.46	265.913	3.28251	0.00783096	HOXA3	NM_030661	PROMOTER
chr9:021342982-021343041	A_17_P06638241	chr9	21342982	139.509	14.3413	3.28211	0.00783334	IFNA6	NM_021002	PROMOTER
chr19:061134292-061134351	A_17_P11004426	chr19	61134292	328.205	20.3189	4.0137	0.00783388	NALP13	NM_176810	INSIDE
chr2:172775194-172775238	A_17_P01675435	chr2	172775194	281.562	28.9492	3.28186	0.00783398	DLX1	NM_001038493	PROMOTER
chr15:087149607-087149666	A_17_P09817776	chr15	87149607	366.879	22.7255	4.01292	0.00783577	AGC1	NM_001135	INSIDE
chr16:025613168-025613227	A_17_P09970710	chr16	25613168	130.192	8.06502	4.01282	0.00783755	HS3ST4	NM_006040	INSIDE
chrX:048656447-048656497	A_17_P11742684	chrX	48656447	130.192	8.06502	4.01282	0.00783758	TFE3	NM_006521	INSIDE
chr4:164621591-164621650	A_17_P03583913	chr4	164621591	298.339	30.7033	3.28049	0.00784005	NPY5R	NM_006174	PROMOTER
chr1:090900193-090900252	A_17_P00371101	chr1	90900193	422.865	43.5458	3.27959	0.00784399	BARHL2	NM_020063	PROMOTER
chr11:106968435-106968494	A_17_P08013279	chr11	106968435	60.596	3.75437	4.01258	0.00784509	ELMOD1	NM_018712	INSIDE
chr19:009088263-009088313	A_17_P10877963	chr19	9088263	290.673	18.0684	4.00786	0.00784839	OR7G1	NM_001005192	PROMOTER
chr1:018180705-018180749	A_17_P00069315	chr1	18180705	7251.45	747.322	3.27847	0.00784899	IGSF21	NM_032880	INSIDE
chr1:006462156-006462200	A_17_P00023976	chr1	6462156	183.542	18.9166	3.27838	0.00784957	PLEKHG5	NM_020631	INSIDE
chr3:100840552-100840611	A_17_P02444206	chr3	100840552	361.366	37.2566	3.27789	0.00785166	COL8A1	NM_001850	INSIDE
chr17:044563757-044563812	A_17_P10352560	chr17	44563757	268.151	16.6883	4.00614	0.00785275	B4GALNT2	NM_153446	PROMOTER
chr7:027017703-027017747	A_17_P05378395	chr7	27017703	3312.1	341.819	3.27644	0.00785808	HOXA13	NM_000522	PROMOTER
chr6:100159305-100159355	A_17_P04931698	chr6	100159305	2354.79	243.032	3.27638	0.00785834	PRDM13	NM_021620	PROMOTER
chr6:117692791-117692835	A_17_P05011584	chr6	117692791	4557.91	470.59	3.27583	0.00786081	VGLL2	NM_153453	PROMOTER
chr12:047207533-047207592	A_17_P08338332	chr12	47207533	163.823	10.2199	4.00269	0.00786234	OR8S1	NM_001005203	INSIDE
chr2:236857662-236857706	A_17_P01981230	chr2	236857662	420.567	43.4521	3.27484	0.00786532	GBX2	NM_001485	INSIDE
chr21:038211734-038211793	A_17_P11381169	chr21	38211734	217.664	13.5932	4.00114	0.0078654	KCNJ6	NM_002240	PROMOTER
chr1:162055201-162055260	A_17_P00567801	chr1	162055201	2530.16	261.428	3.27474	0.0078657	LMX1A	NM_177398	INSIDE
chr6:031197427-031197471	A_17_P04642523	chr6	31197427	5781.76	597.399	3.27474	0.0078657	CDSN	NM_001264	PROMOTER
chr2:113750766-113750821	A_17_P01409478	chr2	113750766	1336.7	138.124	3.27463	0.0078662	PAX8	NM_003466	INSIDE
chr21:038552838-038552897	A_17_P17235689	chr21	38552838	361.757	22.6063	4.00022	0.00786754	KCNJ15	NM_170736	INSIDE
chr5:145694897-145694956	A_17_P04349864	chr5	145694897	141.802	14.6613	3.27379	0.00787041	POU4F3	NM_002700	PROMOTER
chrX:103306902-103306961	A_17_P11859909	chrX	103306902	265.909	16.641	3.99811	0.00787303	ESX1L	NM_153448	PROMOTER
chr12:052614567-052614615	A_17_P08361876	chr12	52614567	8833.73	552.957	3.99778	0.00787342	HOXC13	NM_017410	PROMOTER
chr9:001038122-001038179	A_17_P06542649	chr9	1038122	473.331	48.9658	3.273	0.00787358	DMRT2	NM_006557	PROMOTER
chr9:098549156-098549200	A_17_P06843056	chr9	98549156	850.011	87.9353	3.27297	0.00787372	GPR51	NM_005458	INSIDE
chr14:036196088-036196147	A_17_P09227775	chr14	36196088	387.923	24.2832	3.99774	0.0078739	PAX9	NM_006194	PROMOTER
chr17:032365269-032365319	A_17_P10305329	chr17	32365269	3739.19	234.122	3.99739	0.0078744	LHX1	NM_005568	PROMOTER
chr1:037171035-037171087	A_17_P00141347	chr1	37171035	517.589	53.5531	3.27276	0.00787468	GRIK3	NM_000831	PROMOTER
chr17:036164570-036164629	A_17_P10320352	chr17	36164570	287.448	17.9998	3.99725	0.00787499	KRT25A	NM_181534	INSIDE
chr6:170520633-170520692	A_17_P15895194	chr6	170520633	1641.11	169.815	3.27264	0.00787516	DLL1	NM_005618	PROMOTER
chr20:024987806-024987865	A_17_P11126894	chr20	24987806	663.579	41.5814	3.99626	0.00787732	ACSS1	NM_032501	PROMOTER
chr18:075255867-075255926	A_17_P10846083	chr18	75255867	429.807	26.9336	3.99621	0.00787754	NFATC1	NM_006162	PROMOTER
chr8:097240518-097240563	A_17_P06316327	chr8	97240518	2373.9	245.783	3.2718	0.00787896	GDF6	NM_001001557	INSIDE
chr4:167151395-167151439	A_17_P03595116	chr4	167151395	408.724	42.3171	3.27181	0.00787901	TLL1	NM_012464	PROMOTER
chr7:115906838-115906883	A_17_P05718525	chr7	115906838	1361.63	141.004	3.27153	0.0078802	MET	NM_000245	INSIDE
chr20:061027079-061027138	A_17_P11263060	chr20	61027079	19.7519	1.21507	4.02287	0.00788037	DIDO1	NM_080796	INSIDE
chr6:010526517-010526576	A_17_P15784743	chr6	10526517	1995.77	206.794	3.27068	0.00788402	TFAP2A	NM_003220	PROMOTER
chr1:111390573-111390632	A_17_P00456927	chr1	111390573	28.4913	2.94826	3.27259	0.00788411	CEPT1	NM_001007794	PROMOTER
chr9:126458020-126458064	A_17_P06965601	chr9	126458020	527.776	54.6932	3.27049	0.0078849	LMX1B	NM_002316	INSIDE
chr4:004981327-004981383	A_17_P02902326	chr4	4981327	516.214	53.4981	3.27041	0.00788528	MSX1	NM_002448	INSIDE
chr6:031009132-031009180	A_17_P04641767	chr6	31009132	450.104	46.6559	3.27013	0.00788657	SFTPG	NM_205854	PROMOTER
chr13:027571984-027572043	A_17_P08741733	chr13	27571984	142.238	8.93221	3.99315	0.00788668	FLT3	NM_004119	INSIDE
chr16:001069724-001069768	A_17_P09884718	chr16	1069724	442.175	27.7899	3.99198	0.00788815	SSTR5	NM_001053	INSIDE
chr4:145924225-145924277	A_17_P03496702	chr4	145924225	492.891	51.1269	3.26912	0.00789113	HHIP	NM_022475	PROMOTER
chr5:054562659-054562703	A_17_P03937898	chr5	54562659	3215.76	333.596	3.26898	0.00789169	UNG2	NM_001024592	DOWNSTREAM
chr1:162054539-162054598	A_17_P00567796	chr1	162054539	252.944	26.241	3.26892	0.00789218	LMX1A	NM_177398	INSIDE
chr5:003647531-003647575	A_17_P03725997	chr5	3647531	973.459	101.012	3.26859	0.00789349	IRX1	NM_024337	PROMOTER
chr5:007448253-007448303	A_17_P03746288	chr5	7448253	302.817	31.4298	3.26824	0.00789518	ADCY2	NM_020546	PROMOTER
chr11:059955285-059955344	A_17_P16456581	chr11	59955285	173.292	10.9151	3.9888	0.00789692	MS4A5	NM_023945	INSIDE
chr6:072653903-072653947	A_17_P04810779	chr6	72653903	366.822	38.0839	3.26783	0.00789701	RIMS1	NM_014989	INSIDE
chr8:065657391-065657450	A_17_P16101392	chr8	65657391	470.456	48.8484	3.26768	0.00789767	BHLHB5	NM_152414	INSIDE
chr7:026970879-026970938	A_17_P05378018	chr7	26970879	2558.78	265.761	3.26726	0.00789954	HOXA7	NM_006896	PROMOTER
chr19:018865945-018865989	A_17_P10906980	chr19	18865945	167.388	10.5563	3.98702	0.00790184	LASS1	NM_198207	INSIDE
chr8:065653147-065653191	A_17_P06174915	chr8	65653147	1560.57	162.168	3.26651	0.00790292	BHLHB5	NM_152414	PROMOTER
chr19:057592660-057592719	A_17_P17156189	chr19	57592660	19.7519	1.21507	4.02287	0.00790374	ZNF528	NM_032423	PROMOTER
chr9:114240115-114240159	A_17_P16256144	chr9	114240115	128.794	13.3935	3.26547	0.00790795	AKNA	NM_030767	PROMOTER
chr7:113649166-113649224	A_17_P16007223	chr7	113649166	570.172	59.3014	3.26526	0.00790863	FOXP2	NM_014491	PROMOTER
chr7:030494412-030494459	A_17_P05395743	chr7	30494412	385.498	40.0975	3.26514	0.00790927	CRHR2	NM_001883	INSIDE
chr8:120499010-120499069	A_17_P06424791	chr8	120499010	236.573	24.6087	3.26504	0.00790971	NOV	NM_002514	INSIDE
chr17:044027805-044027853	A_17_P10350264	chr17	44027805	854.062	54.0066	3.98313	0.00791068	HOXB5	NM_002147	PROMOTER
chr6:133080211-133080267	A_17_P05085028	chr6	133080211	375.061	39.0349	3.26429	0.00791308	VNN1	NM_004666	PROMOTER
chr2:227851347-227851406	A_17_P01940466	chr2	227851347	301.437	31.3722	3.2643	0.00791312	COL4A4	NM_000092	INSIDE
chr4:110579855-110579914	A_17_P03341685	chr4	110579855	346.119	36.0281	3.26408	0.00791409	COL25A1	NM_032518	INSIDE
chr7:155106221-155106268	A_17_P05889797	chr7	155106221	1647.64	171.589	3.26337	0.00791722	SHH	NM_000193	PROMOTER
chr5:039466090-039466149	A_17_P03886924	chr5	39466090	259.063	26.9896	3.26282	0.00791996	DAB2	NM_001343	PROMOTER
chr4:110580211-110580267	A_17_P03341689	chr4	110580211	384.291	40.0478	3.26241	0.00792176	COL25A1	NM_032518	INSIDE
chr12:045895235-045895294	A_17_P08332525	chr12	45895235	145.494	9.23062	3.97839	0.0079238	MGC16044	NM_138371	PROMOTER
chr2:172792447-172792491	A_17_P01675556	chr2	172792447	1839.41	191.754	3.26192	0.00792385	DLX2	NM_004405	INSIDE
chr16:031271104-031271151	A_17_P09986342	chr16	31271104	961.734	61.0704	3.97709	0.00792615	ITGAX	NM_000887	PROMOTER
chr17:044033282-044033341	A_17_P10350312	chr17	44033282	1085.66	68.9581	3.97671	0.00792714	HOXB6	NM_156037	PROMOTER
chr5:000579909-000579956	A_17_P03710179	chr5	579909	739.873	77.1791	3.261	0.00792808	SLC9A3	NM_004174	PROMOTER
chr6:030188737-030188796	A_17_P04638625	chr6	30188737	489.053	51.017	3.26094	0.00792834	TRIM31	NM_007028	INSIDE
chr11:069602895-069602939	A_17_P16468904	chr11	69602895	221.055	14.0463	3.97614	0.00792922	TMEM16A	NM_018043	INSIDE
chr1:198648545-198648598	A_17_P00731173	chr1	198648545	166.643	17.3874	3.26065	0.00792989	LMOD1-TIMM17A	NM_012134-NM_006335	DIVERGENT_PROMOTER
chr2:104926678-104926725	A_17_P01379430	chr2	104926678	94.4497	9.85709	3.26031	0.00793197	POU3F3	NM_006236	PROMOTER
chr1:090897130-090897176	A_17_P00371073	chr1	90897130	455.471	47.5447	3.26	0.00793262	BARHL2	NM_020063	PROMOTER
chr2:019479099-019479149	A_17_P01026142	chr2	19479099	1579.51	164.908	3.25974	0.0079338	OSR1	NM_145260	INSIDE
chr1:020624956-020625000	A_17_P00079809	chr1	20624956	290.925	30.3859	3.25917	0.00793652	FAM43B	NM_207334	INSIDE
chr11:061714985-061715044	A_17_P07830919	chr11	61714985	419.023	26.6871	3.97281	0.00793733	SCGB1D1	NM_006552	INSIDE
chr5:044426267-044426326	A_17_P03907656	chr5	44426267	343.986	35.939	3.25873	0.00793858	FGF10	NM_004465	PROMOTER
chr2:119632270-119632314	A_17_P15315199	chr2	119632270	190.139	19.8723	3.25822	0.00794104	C1QL2	NM_182528	INSIDE
chr2:020787303-020787358	A_17_P01032815	chr2	20787303	353.011	36.9061	3.25778	0.00794289	GDF7	NM_182828	PROMOTER
chrX:132272456-132272515	A_17_P11964382	chrX	132272456	290.396	18.5247	3.9705	0.00794353	GPC4	NM_001448	INSIDE
chr5:044426881-044426940	A_17_P03907662	chr5	44426881	201.211	21.0376	3.25767	0.00794366	FGF10	NM_004465	PROMOTER
chr14:020489109-020489168	A_17_P09156492	chr14	20489109	679.266	43.3409	3.97017	0.00794402	RNASE2	NM_002934	PROMOTER
chr10:028612756-028612815	A_17_P07147543	chr10	28612756	184.861	19.3388	3.25687	0.00794729	MPP7	NM_173496	PROMOTER
chr14:020048218-020048277	A_17_P09154994	chr14	20048218	289.864	18.513	3.96877	0.00794796	RNASE10	NM_001012975	PROMOTER
chr18:018248706-018248765	A_17_P10566726	chr18	18248706	278.786	17.8129	3.96816	0.00794956	CTAGE1	NM_022663	INSIDE
chr1:047612904-047612951	A_17_P15057833	chr1	47612904	972.968	101.831	3.25622	0.00794999	FOXD2	NM_004474	PROMOTER
chr5:172596870-172596919	A_17_P04471781	chr5	172596870	632.132	66.1859	3.25563	0.00795271	NKX2-5	NM_004387	PROMOTER
chr19:060078850-060078909	A_17_P11001094	chr19	60078850	388.423	24.8524	3.96617	0.00795456	FCAR	NM_133279	INSIDE
chr6:075973211-075973260	A_17_P04825691	chr6	75973211	2781.45	291.325	3.25513	0.00795498	COL12A1	NM_080645	PROMOTER
chr15:094670661-094670713	A_17_P09853706	chr15	94670661	375.013	23.9992	3.96588	0.00795526	NR2F2	NM_021005	PROMOTER
chr4:071405340-071405399	A_17_P03169126	chr4	71405340	83.5413	8.75016	3.25511	0.0079567	SMR3A	NM_012390	PROMOTER
chrX:133398858-133398917	A_17_P11969013	chrX	133398858	188.225	12.0494	3.96542	0.0079573	hsa-mir-450-1	hsa-mir-450-1	DOWNSTREAM
chr7:027001542-027001586	A_17_P15920266	chr7	27001542	1245.12	130.468	3.25452	0.00795783	HOXA11	NM_005523	PROMOTER
chr6:100163123-100163170	A_17_P04931737	chr6	100163123	4471.64	468.625	3.2543	0.00795884	PRDM13	NM_021620	INSIDE
chr16:031447107-031447158	A_17_P09987053	chr16	31447107	1537.37	98.515	3.96397	0.00796012	ERAF	NM_016633	INSIDE
chr1:155987285-155987330	A_17_P00540112	chr1	155987285	361.022	37.8426	3.254	0.00796027	FY	NM_002036	PROMOTER
chr1:178185859-178185907	A_17_P00638482	chr1	178185859	7061.91	740.354	3.25377	0.00796126	CACNA1E	NM_000721	INSIDE
chr7:155105190-155105249	A_17_P05889790	chr7	155105190	400.124	41.962	3.25329	0.00796355	SHH	NM_000193	PROMOTER
chr1:002961144-002961190	A_17_P00007313	chr1	2961144	248.335	26.0484	3.25302	0.00796486	ACTRT2	NM_080431	PROMOTER
chr19:006453839-006453887	A_17_P10870473	chr19	6453839	143.767	9.22329	3.9623	0.00796565	TUBB4	NM_006087	PROMOTER
chr7:026957582-026957641	A_17_P05377907	chr7	26957582	1435.11	150.558	3.25277	0.0079659	HOXA5	NM_019102	PROMOTER
chr7:026961651-026961702	A_17_P05377940	chr7	26961651	1900.7	199.405	3.25275	0.00796596	HOXA6	NM_024014	PROMOTER
chr6:000338641-000338685	A_17_P04501392	chr6	338641	2267.3	238.014	3.25185	0.00797014	IRF4	NM_002460	INSIDE
chr9:126457898-126457949	A_17_P06965600	chr9	126457898	938.931	98.6526	3.25059	0.00797599	LMX1B	NM_002316	INSIDE
chr10:101284139-101284198	A_17_P07424847	chr10	101284139	1285.38	82.8083	3.95627	0.00798027	NKX2-3	NM_145285	INSIDE
chr7:088034248-088034307	A_17_P05596902	chr7	88034248	142.377	14.9691	3.24965	0.00798061	FLJ32110	NM_181646	INSIDE
chr7:026913855-026913909	A_17_P05377560	chr7	26913855	1393.87	146.557	3.24956	0.00798078	HOXA2	NM_006735	INSIDE
chr17:044044828-044044887	A_17_P10350404	chr17	44044828	959.202	61.8118	3.95588	0.00798133	HOXB8	NM_024016	INSIDE
chr7:142693267-142693326	A_17_P05840742	chr7	142693267	98.9657	10.4076	3.24928	0.00798307	TAS2R41	NM_176883	DOWNSTREAM
chr2:036496275-036496324	A_17_P01103658	chr2	36496275	3856.1	405.634	3.24889	0.00798387	CRIM1	NM_016441	INSIDE
chr7:027003298-027003354	A_17_P05378272	chr7	27003298	2757.82	290.354	3.24764	0.00798966	HOXA11	NM_005523	PROMOTER
chr6:054818146-054818205	A_17_P04750828	chr6	54818146	246.792	25.9834	3.24763	0.00798987	C6orf143	NM_001010872	PROMOTER
chr15:050874506-050874550	A_17_P09659701	chr15	50874506	369.521	23.8687	3.95247	0.00799057	ONECUT1	NM_004498	PROMOTER
chr9:005221838-005221897	A_17_P06562102	chr9	5221838	188.183	19.8159	3.24741	0.0079911	INSL4	NM_002195	INSIDE
chr11:056166358-056166417	A_17_P07810301	chr11	56166358	295.852	19.1193	3.95177	0.00799249	OR5AP2	NM_001002925	INSIDE
chr5:161209408-161209467	A_17_P04417682	chr5	161209408	198.831	20.9474	3.2467	0.0079943	GABRA1	NM_000806	INSIDE
chr5:085945042-085945101	A_17_P04074411	chr5	85945042	96.2015	10.135	3.24672	0.00799502	COX7C	NM_001867	PROMOTER
chr1:006413623-006413667	A_17_P00023857	chr1	6413623	1607.91	169.456	3.2462	0.00799639	HES2	NM_019089	INSIDE
chr7:027014711-027014767	A_17_P05378364	chr7	27014711	2527.32	266.428	3.24579	0.00799829	HOXA13	NM_000522	PROMOTER
chr6:127482813-127482859	A_17_P05056711	chr6	127482813	1333.61	140.619	3.24547	0.00799979	RSPO3	NM_032784	INSIDE
chr20:019139178-019139235	A_17_P11098505	chr20	19139178	329.678	21.3527	3.94857	0.00800095	SLC24A3	NM_020689	PROMOTER
chr17:044064329-044064379	A_17_P10350552	chr17	44064329	631.2	40.9031	3.94782	0.00800267	HOXB9	NM_024017	PROMOTER
chr17:008644779-008644835	A_17_P10219544	chr17	8644779	185.244	12.0166	3.94634	0.00800764	FLJ35773	NM_152599	PROMOTER
chr22:035543817-035543876	A_17_P11494786	chr22	35543817	116.604	7.56409	3.9463	0.00800812	PVALB	NM_002854	PROMOTER
chr7:026994773-026994822	A_17_P15920237	chr7	26994773	4363.37	460.721	3.24348	0.00800909	HOXA11	NM_005523	INSIDE
chr7:027003183-027003242	A_17_P05378271	chr7	27003183	3130.62	330.573	3.24341	0.00800943	HOXA11	NM_005523	PROMOTER
chr1:167362980-167363024	A_17_P15142986	chr1	167362980	647.034	68.3388	3.24306	0.00801111	PRRX1	NM_006902	PROMOTER
chr7:020604023-020604069	A_17_P05348499	chr7	20604023	478.816	50.5936	3.24245	0.00801396	SP8	NM_198956	PROMOTER
chr5:180399830-180399887	A_17_P15774229	chr5	180399830	3416.8	361.112	3.24213	0.00801542	BTNL9	NM_152547	INSIDE
chr7:026912112-026912165	A_17_P05377541	chr7	26912112	2057.69	217.474	3.24211	0.00801553	HOXA1	NM_153620	PROMOTER
chr5:143532585-143532644	A_17_P04341037	chr5	143532585	5.93963	0.505082	3.55578	0.00801606	KCTD16	NM_020768	INSIDE
chr7:156307461-156307505	A_17_P16046423	chr7	156307461	8841.49	935.024	3.24121	0.00801971	HLXB9	NM_005515	PROMOTER
chr7:121102089-121102148	A_17_P05743360	chr7	121102089	106.699	11.2841	3.24118	0.00802049	PTPRZ1	NM_002851	PROMOTER
chr5:134400728-134400778	A_17_P04297782	chr5	134400728	7324.57	774.699	3.24104	0.00802053	PITX1	NM_002653	PROMOTER
chr1:003004237-003004291	A_17_P00007534	chr1	3004237	845.772	89.4655	3.24087	0.00802135	PRDM16	NM_022114	PROMOTER
chr4:187563358-187563417	A_17_P03691998	chr4	187563358	144.605	15.2968	3.24082	0.00802212	F11	NM_000128	INSIDE
chr19:056217776-056217820	A_17_P17154773	chr19	56217776	757.291	49.343	3.93993	0.00802365	KLK11	NM_144947	INSIDE
chr3:135999099-135999146	A_17_P02601124	chr3	135999099	1495.7	158.319	3.23991	0.00802581	EPHB1	NM_004441	INSIDE
chr7:026958747-026958791	A_17_P15920156	chr7	26958747	814.848	86.2615	3.23974	0.00802661	HOXA6	NM_024014	INSIDE
chr2:170043217-170043261	A_17_P15354278	chr2	170043217	364.406	38.5888	3.23929	0.0080288	LRP2	NM_004525	INSIDE
chr9:109622935-109622994	A_17_P06891934	chr9	109622935	345.402	36.5857	3.23893	0.00803055	PALM2	NM_001037293	INSIDE
chr7:115734613-115734666	A_17_P05717444	chr7	115734613	948.646	100.499	3.23869	0.00803157	CAV2	NM_001233	INSIDE
chr14:036123276-036123335	A_17_P09227365	chr14	36123276	249.405	16.2888	3.93654	0.00803305	NKX2-8	NM_014360	PROMOTER
chr7:027002876-027002921	A_17_P05378268	chr7	27002876	3681.04	390.11	3.23816	0.00803405	HOXA11	NM_005523	PROMOTER
chr12:079613596-079613640	A_17_P08482400	chr12	79613596	785.425	51.3149	3.93602	0.00803407	MYF5	NM_005593	INSIDE
chr1:002955847-002955895	A_17_P00007269	chr1	2955847	673.174	71.3426	3.23814	0.00803414	ACTRT2	NM_080431	PROMOTER
chr7:026999325-026999374	A_17_P05378236	chr7	26999325	1247.5	132.233	3.23789	0.00803534	HOXA11	NM_005523	PROMOTER
chr8:056176097-056176153	A_17_P06131416	chr8	56176097	159.157	16.8701	3.23791	0.00803551	XKR4	NM_052898	PROMOTER
chr14:036197562-036197606	A_17_P09227785	chr14	36197562	166.125	10.8578	3.93546	0.00803669	PAX9	NM_006194	PROMOTER
chr4:111916732-111916787	A_17_P15601772	chr4	111916732	1534.4	162.728	3.23714	0.00803885	PITX2	NM_153427	PROMOTER
chr7:027016127-027016174	A_17_P05378378	chr7	27016127	995.911	105.641	3.23684	0.00804026	HOXA13	NM_000522	PROMOTER
chr4:041592931-041592990	A_17_P03062899	chr4	41592931	454.153	48.1743	3.23684	0.00804028	PHOX2B	NM_003924	PROMOTER
chr4:147919528-147919581	A_17_P03505537	chr4	147919528	541.081	57.3999	3.23672	0.00804083	POU4F2	NM_004575	INSIDE
chr17:043863972-043864019	A_17_P10349296	chr17	43863972	301.235	19.7188	3.93324	0.00804175	SCAP1	NM_003726	PROMOTER
chr4:158499776-158499835	A_17_P03556496	chr4	158499776	98.0556	10.4023	3.2367	0.00804189	GRIA2	NM_000826	INSIDE
chr5:174802851-174802895	A_17_P04481176	chr5	174802851	363.169	38.5365	3.23634	0.00804269	DRD1	NM_000794	INSIDE
chr8:097241295-097241339	A_17_P06316332	chr8	97241295	443.258	47.0494	3.2359	0.00804474	GDF6	NM_001001557	INSIDE
chr6:132170649-132170699	A_17_P05080389	chr6	132170649	1453.21	154.259	3.23582	0.0080451	ENPP1	NM_006208	PROMOTER
chr19:046419097-046419148	A_17_P10963752	chr19	46419097	6190.07	405.665	3.9316	0.00804595	AXL	NM_001699	INSIDE
chr14:029464219-029464276	A_17_P09197333	chr14	29464219	176.869	11.5905	3.93166	0.00804681	PRKD1	NM_002742	INSIDE
chr12:112374083-112374134	A_17_P16593359	chr12	112374083	2019.53	132.379	3.93127	0.00804683	LHX5	NM_022363	PROMOTER
chr7:026937251-026937296	A_17_P05377738	chr7	26937251	5223.64	554.644	3.23542	0.00804696	HOXA3	NM_030661	PROMOTER
chrX:106824587-106824637	A_17_P11873839	chrX	106824587	441.178	28.9475	3.92985	0.00805081	TSC22D3	NM_198057	INSIDE
chr1:157803735-157803785	A_17_P00548078	chr1	157803735	1267.23	134.644	3.23447	0.00805148	F11R	NM_016946	INSIDE
chr1:044547386-044547435	A_17_P00171639	chr1	44547386	2864.28	304.456	3.23386	0.00805433	C1orf164	NM_018150	INSIDE
chr6:108592685-108592729	A_17_P15848315	chr6	108592685	274.275	29.1633	3.2334	0.00805665	NR2E1	NM_003269	PROMOTER
chr7:015374864-015374922	A_17_P05322438	chr7	15374864	473.487	50.371	3.23266	0.00806006	FLJ16237	NM_001004320	PROMOTER
chr9:122071978-122072037	A_17_P06946508	chr9	122071978	3650.42	388.349	3.23264	0.00806014	LHX6	NM_199160	PROMOTER
chr6:026772480-026772539	A_17_P04627061	chr6	26772480	171.21	18.2145	3.23261	0.00806063	ZNF322A	NM_024639	PROMOTER
chr8:132122804-132122849	A_17_P06475874	chr8	132122804	227.911	24.2627	3.23166	0.00806497	ADCY8	NM_001115	INSIDE
chr6:001337436-001337488	A_17_P04506784	chr6	1337436	2127.95	226.579	3.23138	0.0080661	FOXF2	NM_001452	INSIDE
chr11:059237014-059237073	A_17_P07821015	chr11	59237014	122.555	8.07799	3.92329	0.00807043	OR10V1	NM_001005324	INSIDE
chr3:188905161-188905208	A_17_P02839626	chr3	188905161	315.092	33.5902	3.22966	0.00807438	RTP2	NM_001004312	PROMOTER
chr9:070713087-070713145	A_17_P06724333	chr9	70713087	289.428	30.8549	3.22963	0.00807448	TRPM3	NM_001007470	INSIDE
chr11:128071689-128071748	A_17_P08112579	chr11	128071689	169.627	11.201	3.92066	0.00807595	FLI1	NM_002017	INSIDE
chr6:160649225-160649284	A_17_P05211900	chr6	160649225	234.069	24.9756	3.22834	0.00808069	SLC22A2	NM_003058	INSIDE
chr7:099071761-099071820	A_17_P05645202	chr7	99071761	248.93	26.5616	3.22833	0.00808074	CYP3A43	NM_022820	INSIDE
chr6:030155312-030155371	A_17_P04638470	chr6	30155312	256.592	27.383	3.22812	0.00808175	RNF39	NM_170770	PROMOTER
chr9:130567133-130567177	A_17_P06981664	chr9	130567133	1924.41	205.375	3.22808	0.00808179	PRDM12	NM_021619	PROMOTER
chr4:175819202-175819260	A_17_P15639884	chr4	175819202	359.446	38.3785	3.22741	0.0080851	HPGD	NM_000860	PROMOTER
chr2:200157932-200157976	A_17_P01806032	chr2	200157932	4531.72	483.927	3.2272	0.00808602	SATB2-FLJ32063	NM_015265-NM_153031	DIVERGENT_PROMOTER
chr19:012724226-012724270	A_17_P10887209	chr19	12724226	7943.43	525.999	3.91663	0.0080866	VMD2L1	NM_017682	PROMOTER
chr3:189603248-189603307	A_17_P02843399	chr3	189603248	264.103	28.205	3.22708	0.00808681	LPP	NM_005578	INSIDE
chrX:105226078-105226137	A_17_P11867847	chrX	105226078	174.561	11.5676	3.91558	0.00809042	MUM1L1	NM_152423	PROMOTER
chr11:027701200-027701248	A_17_P07712655	chr11	27701200	738.637	48.9591	3.91521	0.00809053	BDNF	NM_170731	PROMOTER
chr2:056061214-056061273	A_17_P01196690	chr2	56061214	1006.25	107.537	3.22608	0.00809137	EFEMP1	NM_018894	PROMOTER
chr6:100158991-100159041	A_17_P04931695	chr6	100158991	322.433	34.4684	3.22565	0.00809347	PRDM13	NM_021620	PROMOTER
chr1:018705582-018705632	A_17_P00071691	chr1	18705582	3224.27	344.774	3.22525	0.00809532	PAX7	NM_002584	INSIDE
chr15:039007357-039007404	A_17_P09609369	chr15	39007357	329.194	21.8473	3.91341	0.00809582	DLL4	NM_019074	PROMOTER
chr9:075732163-075732222	A_17_P06747040	chr9	75732163	84.3796	9.02173	3.22542	0.00809583	PCSK5	NM_006200	PROMOTER
chr9:123856476-123856532	A_17_P06954351	chr9	123856476	2109.19	225.57	3.22504	0.00809632	LHX2	NM_004789	INSIDE
chrX:054440071-054440125	A_17_P11756040	chrX	54440071	216.192	14.3484	3.91335	0.00809639	GNL3L	NM_019067	INSIDE
chr1:150464086-150464133	A_17_P00517088	chr1	150464086	766.437	82.0003	3.22447	0.00809909	ILF2-NPR1	NM_004515-NM_000906	DIVERGENT_PROMOTER
chr4:155895939-155895998	A_17_P03543903	chr4	155895939	233.011	24.9302	3.22443	0.00809934	FGG	NM_021870	PROMOTER
chr9:133180712-133180756	A_17_P16270901	chr9	133180712	218.966	23.4283	3.22438	0.00809962	ABO	NM_020469	PROMOTER
chr1:183528903-183528962	A_17_P00663607	chr1	183528903	133.529	14.2891	3.22417	0.00810088	PLA2G4A	NM_024420	PROMOTER
chr20:055274169-055274213	A_17_P11233714	chr20	55274169	305.495	20.3015	3.91149	0.00810101	BMP7	NM_001719	INSIDE
chr10:133806230-133806274	A_17_P07587369	chr10	133806230	78.8964	5.23788	3.9129	0.00810128	C10orf39	NM_194303	INSIDE
chr1:047612342-047612400	A_17_P00181995	chr1	47612342	1536.32	164.436	3.22388	0.00810188	FOXD2	NM_004474	PROMOTER
chr21:035185189-035185233	A_17_P11366350	chr21	35185189	577.277	38.3767	3.91096	0.00810227	RUNX1	NM_001001890	PROMOTER
chr17:044068120-044068179	A_17_P10350585	chr17	44068120	517.697	34.4217	3.91072	0.00810291	hsa-mir-196a-1	hsa-mir-196a-1	PROMOTER
chr16:003245715-003245774	A_17_P16845089	chr16	3245715	157.658	10.4847	3.91045	0.00810453	MEFV	NM_000243	INSIDE
chrX:066545523-066545582	A_17_P11770966	chrX	66545523	173.791	11.5598	3.91016	0.00810525	AR	NM_000044	PROMOTER
chr7:026986487-026986531	A_17_P15920218	chr7	26986487	81.6593	8.74365	3.22331	0.00810528	HOXA10	NM_018951	INSIDE
chr12:052668743-052668789	A_17_P08362325	chr12	52668743	622.047	41.402	3.90925	0.00810694	HOXC10	NM_017409	INSIDE
chr2:102383320-102383379	A_17_P01366995	chr2	102383320	386.29	41.3809	3.22265	0.00810789	IL1RL1	NM_016232	PROMOTER
chrX:102418169-102418217	A_17_P17382876	chrX	102418169	206.909	13.7838	3.90795	0.00811123	WBP5	NM_001006612	INSIDE
chr1:154603067-154603126	A_17_P15134658	chr1	154603067	156.936	16.8221	3.22175	0.00811259	FCRL1	NM_052938	PROMOTER
chr3:124653069-124653128	A_17_P02552502	chr3	124653069	60.3223	6.46527	3.22191	0.00811316	ADCY5	NM_183357	PROMOTER
chr17:010264471-010264530	A_17_P10226382	chr17	10264471	339.191	22.6127	3.90689	0.00811361	MYH8	NM_002472	INSIDE
chr6:075970670-075970729	A_17_P04825676	chr6	75970670	225.207	24.1489	3.22122	0.00811477	COL12A1	NM_004370	INSIDE
chr1:110926917-110926976	A_17_P00455547	chr1	110926917	239.451	25.6837	3.22081	0.00811682	KCNA3	NM_002232	INSIDE
chr9:017570154-017570213	A_17_P06620432	chr9	17570154	205.164	22.0068	3.22075	0.00811713	SH3GL2	NM_003026	INSIDE
chr6:101021338-101021395	A_17_P04935948	chr6	101021338	1040.88	111.654	3.2207	0.00811717	SIM1	NM_005068	PROMOTER
chr2:056125759-056125818	A_17_P01197001	chr2	56125759	113.408	12.1685	3.22029	0.00811982	hsa-mir-217	hsa-mir-217	PROMOTER
chr7:025962898-025962957	A_17_P05372868	chr7	25962898	8.5568	0.876495	3.28725	0.00812198	NFE2L3	NM_004289	PROMOTER
chr19:016299126-016299176	A_17_P10898205	chr19	16299126	302.93	20.2423	3.90354	0.00812284	KLF2	NM_016270	INSIDE
chr12:052614712-052614760	A_17_P08361878	chr12	52614712	7074.35	473.038	3.90257	0.00812536	HOXC13	NM_017410	PROMOTER
chr6:031186318-031186368	A_17_P04642438	chr6	31186318	607.693	65.2681	3.21889	0.00812588	C6orf15	NM_014070	DOWNSTREAM
chr14:036126698-036126757	A_17_P09227392	chr14	36126698	184.609	12.345	3.90247	0.00812642	NKX2-8	NM_014360	PROMOTER
chr1:018180551-018180596	A_17_P00069314	chr1	18180551	4206.42	451.821	3.21877	0.00812644	IGSF21	NM_032880	INSIDE
chr12:131802842-131802897	A_17_P08702173	chr12	131802842	120.717	8.07677	3.9017	0.00813001	P2RX2	NM_012226	PROMOTER
chr13:027442020-027442079	A_17_P08741224	chr13	27442020	249.916	16.7337	3.90062	0.00813119	CDX2	NM_001265	PROMOTER
chr2:222985411-222985470	A_17_P15386520	chr2	222985411	182.938	19.6624	3.21785	0.00813126	FLJ32447	NM_153038	PROMOTER
chr4:111192780-111192839	A_17_P03343973	chr4	111192780	293.925	31.5947	3.21769	0.00813175	EGF	NM_001963	INSIDE
chr7:027017372-027017425	A_17_P05378391	chr7	27017372	1519.79	163.409	3.21731	0.00813351	HOXA13	NM_000522	PROMOTER
chrX:152428175-152428232	A_17_P12034604	chrX	152428175	151.397	10.1422	3.89989	0.00813424	DUSP9	NM_001395	PROMOTER
chr9:130566686-130566731	A_17_P06981661	chr9	130566686	1188.16	127.773	3.21708	0.0081346	PRDM12	NM_021619	PROMOTER
chr12:101375651-101375710	A_17_P08579130	chr12	101375651	197.768	13.2542	3.89929	0.00813528	IGF1	NM_000618	INSIDE
chr7:156307360-156307404	A_17_P16046422	chr7	156307360	8185.98	880.575	3.21664	0.00813675	HLXB9	NM_005515	PROMOTER
chr19:055398240-055398289	A_17_P10988791	chr19	55398240	177.842	11.9263	3.89837	0.00813777	MYH14	NM_024729	PROMOTER
chr12:051132302-051132361	A_17_P08354497	chr12	51132302	772.144	51.8109	3.89754	0.0081394	KRT6B	NM_005555	PROMOTER
chr6:031185933-031185978	A_17_P04642434	chr6	31185933	4060.66	437.127	3.21559	0.00814182	C6orf15	NM_014070	DOWNSTREAM
chr18:000897100-000897146	A_17_P10502654	chr18	897100	1226.54	82.3782	3.89618	0.00814317	ADCYAP1	NM_001117	INSIDE
chr7:156307250-156307299	A_17_P16046421	chr7	156307250	8694.75	936.483	3.21482	0.00814554	HLXB9	NM_005515	PROMOTER
chr1:163677660-163677719	A_17_P00574733	chr1	163677660	2075.41	223.585	3.2145	0.00814709	C1orf32	NM_199351	PROMOTER
chr6:032183995-032184051	A_17_P04646097	chr6	32183995	2519.15	271.403	3.21443	0.00814743	TNXB	NM_019105	INSIDE
chr17:004833745-004833796	A_17_P10203778	chr17	4833745	77.9662	5.23945	3.89536	0.00815045	INCA1	NM_213726	INSIDE
chr1:085225227-085225277	A_17_P00345369	chr1	85225227	1091.18	117.644	3.21339	0.00815248	MCOLN3	NM_018298	INSIDE
chr6:117909435-117909494	A_17_P05012636	chr6	117909435	3069.63	331.092	3.21276	0.00815555	DCBLD1	NM_173674	PROMOTER
chr10:092606592-092606651	A_17_P07388861	chr10	92606592	165.693	11.1652	3.89143	0.00815815	HTR7	NM_000872	INSIDE
chr1:155538554-155538606	A_17_P00538183	chr1	155538554	109.975	11.8664	3.21222	0.0081587	OR6K6	NM_001005184	INSIDE
chr21:033365960-033366017	A_17_P11357544	chr21	33365960	625.117	42.1681	3.8899	0.00816083	OLIG1	NM_138983	INSIDE
chr7:022536719-022536766	A_17_P05357688	chr7	22536719	391.041	42.2143	3.21152	0.00816165	IL6	NM_000600	PROMOTER
chr12:051457994-051458047	A_17_P08356423	chr12	51457994	266.988	18.0149	3.88952	0.00816231	KRT2B	NM_015848	PROMOTER
chr10:023522575-023522625	A_17_P07126297	chr10	23522575	1297.51	140.112	3.21109	0.00816368	PTF1A	NM_178161	INSIDE
chrX:046801520-046801566	A_17_P11737885	chrX	46801520	202.99	13.71	3.88811	0.00816654	RBM10	NM_005676	INSIDE
chr14:060185064-060185108	A_17_P16707881	chr14	60185064	176.311	11.9108	3.88778	0.00816747	SIX1	NM_005982	INSIDE
chrX:133399141-133399197	A_17_P11969015	chrX	133399141	176.311	11.9108	3.88778	0.00816753	hsa-mir-450-1	hsa-mir-450-1	DOWNSTREAM
chr7:050122662-050122721	A_17_P05481665	chr7	50122662	101.497	10.9659	3.21035	0.00816782	ZNFN1A1	NM_006060	INSIDE
chr6:133074395-133074454	A_17_P05085002	chr6	133074395	101.497	10.9659	3.21035	0.00816829	VNN1	NM_004666	INSIDE
chr1:227603850-227603898	A_17_P00857543	chr1	227603850	112.516	12.1627	3.20959	0.00817194	TRIM67	NM_001004342	PROMOTER
chr17:050698829-050698887	A_17_P10378790	chr17	50698829	276.123	18.6764	3.88602	0.00817285	HLF	NM_002126	INSIDE
chr6:117692206-117692265	A_17_P15854819	chr6	117692206	664.278	71.8359	3.20901	0.00817383	VGLL2	NM_153453	PROMOTER
chr13:024298560-024298619	A_17_P08726873	chr13	24298560	111.897	7.56944	3.88585	0.00817415	TDRD4	NM_019038	PROMOTER
chr12:051178112-051178171	A_17_P08354621	chr12	51178112	381.039	25.7927	3.88491	0.00817503	KRT6A	NM_005554	PROMOTER
chr6:010521713-010521763	A_17_P04550242	chr6	10521713	2307.18	249.579	3.20857	0.00817599	TFAP2A	NM_001032280	PROMOTER
chr1:063496246-063496305	A_17_P00247016	chr1	63496246	481.026	52.0575	3.20794	0.00817909	FOXD3	NM_012183	PROMOTER
chr12:052648034-052648093	A_17_P08362139	chr12	52648034	2406.25	163.164	3.8824	0.00818198	HOXC11	NM_014212	PROMOTER
chr1:149933813-149933872	A_17_P00514856	chr1	149933813	104.038	11.2627	3.20748	0.00818229	SPRR2G	NM_001014291	DOWNSTREAM
chr17:029928191-029928247	A_17_P10296681	chr17	29928191	698.056	47.3673	3.88138	0.00818494	FLJ44815	NM_207454	INSIDE
chr14:056341875-056341920	A_17_P09313553	chr14	56341875	881.931	59.8873	3.88034	0.00818782	OTX2	NM_172337	INSIDE
chr2:010813857-010813915	A_17_P00986516	chr2	10813857	4938.68	535.33	3.20562	0.00819038	ATP6V1C2	NM_144583	INSIDE
chr1:182436116-182436175	A_17_P00658194	chr1	182436116	458.799	49.7494	3.20511	0.00819292	HMCN1	NM_031935	INSIDE
chr6:010525832-010525884	A_17_P04550267	chr6	10525832	1120.02	121.498	3.20452	0.0081958	TFAP2A	NM_003220	PROMOTER
LACC:GD36C_19_2	LACC:GD36C_19_2	NONE	NONE	387.88	42.0787	3.20445	0.00819621	LACC:GD36C_19_2	NONE	NONE
chr7:142148268-142148312	A_17_P16028025	chr7	142148268	190.672	20.6848	3.20445	0.00819629	TRPV5-C7orf34	NM_019841-NM_178829	DIVERGENT_PROMOTER
chr4:046233613-046233672	A_17_P03082565	chr4	46233613	1512.89	164.175	3.20401	0.00819833	GABRA2	NM_000807	PROMOTER
chr9:123854469-123854513	A_17_P06954336	chr9	123854469	249.526	27.0784	3.20398	0.00819856	LHX2	NM_004789	INSIDE
chr3:147362552-147362611	A_17_P02650639	chr3	147362552	331.706	35.998	3.20392	0.00819902	PLOD2	NM_182943	PROMOTER
chr9:122369384-122369443	A_17_P06947672	chr9	122369384	147.109	15.9677	3.20366	0.00820052	OR1N1	NM_012363	PROMOTER
chr1:148779019-148779063	A_17_P00510207	chr1	148779019	3834.1	416.36	3.20298	0.00820336	S100A10	NM_002966	INSIDE
chr15:089442681-089442731	A_17_P09827111	chr15	89442681	498.456	33.9809	3.87467	0.00820403	SV2B	NM_014848	PROMOTER
chr9:084515386-084515437	A_17_P06786559	chr9	84515386	331.275	35.9792	3.20279	0.00820436	NTRK2	NM_001007097	INSIDE
chr7:026980243-026980290	A_17_P05378095	chr7	26980243	4764.84	517.529	3.20271	0.00820467	HOXA9	NM_152739	PROMOTER
chr11:006173435-006173494	A_17_P07617725	chr11	6173435	186.691	12.7269	3.87469	0.00820513	OR52W1	NM_001005178	PROMOTER
chr20:004175311-004175370	A_17_P11028483	chr20	4175311	469.746	32.0386	3.874	0.00820609	ADRA1D	NM_000678	INSIDE
chr12:010172221-010172280	A_17_P16532248	chr12	10172221	200.312	13.6637	3.87382	0.00820692	CLEC7A	NM_197954	INSIDE
chr19:056336548-056336592	A_17_P10991972	chr19	56336548	10701.6	730.341	3.87311	0.00820841	SIGLEC7	NM_014385	PROMOTER
chr14:053491165-053491209	A_17_P09299985	chr14	53491165	376.134	25.6684	3.87319	0.00820842	BMP4	NM_130851	PROMOTER
chr1:023634770-023634829	A_17_P00091656	chr1	23634770	12.1743	1.31425	3.21152	0.00820867	ID3	NM_002167	PROMOTER
chr10:001768627-001768686	A_17_P16284714	chr10	1768627	234.221	25.4567	3.20175	0.00820957	ADARB2	NM_018702	INSIDE
chr17:053596276-053596324	A_17_P10392494	chr17	53596276	224.549	15.3296	3.87263	0.00821043	OR4D2	NM_001004707	PROMOTER
chr19:059737542-059737591	A_17_P11000500	chr19	59737542	215.738	14.7401	3.87147	0.00821331	FLJ00060	NM_033206	PROMOTER
chr20:025008781-025008840	A_17_P11127010	chr20	25008781	148.042	10.1221	3.87042	0.00821748	VSX1	NM_199425	INSIDE
chr21:041802230-041802274	A_17_P11398833	chr21	41802230	337.699	23.0975	3.86993	0.0082178	TMPRSS2	NM_005656	PROMOTER
chr7:154746543-154746592	A_17_P05887737	chr7	154746543	541.328	58.9051	3.20004	0.00821791	EN2	NM_001427	PROMOTER
chr14:028308312-028308371	A_17_P09191432	chr14	28308312	143.255	9.8007	3.86956	0.00821981	FOXG1B	NM_005249	INSIDE
chr5:017272600-017272659	A_17_P03793262	chr5	17272600	279.504	30.429	3.19935	0.00822137	BASP1	NM_006317	INSIDE
chr1:087510470-087510529	A_17_P00355716	chr1	87510470	240.704	26.2064	3.19927	0.00822184	LMO4	NM_006769	INSIDE
chr4:155873036-155873095	A_17_P03543751	chr4	155873036	122.642	13.3519	3.19934	0.00822189	FGA	NM_021871	PROMOTER
chrX:053952257-053952311	A_17_P11754629	chrX	53952257	215.117	14.7269	3.8686	0.00822206	PHF8	NM_015107	INSIDE
chr19:056105309-056105356	A_17_P10991141	chr19	56105309	1699.74	116.427	3.86782	0.00822361	KLK4	NM_004917	INSIDE
chr14:023880067-023880111	A_17_P09171664	chr14	23880067	179.391	12.2846	3.86818	0.00822366	RIPK3	NM_006871	PROMOTER
chr21:044954125-044954172	A_17_P17242476	chr21	44954125	990.287	67.8326	3.8678	0.00822373	C21orf29	NM_144991	INSIDE
LACC:SRN_20727	LACC:SRN_20727	NONE	NONE	226.499	24.6668	3.19886	0.00822383	LACC:SRN_20727	NONE	NONE
chr2:172778444-172778488	A_17_P01675458	chr2	172778444	2101.84	228.931	3.19867	0.00822465	DLX1	NM_001038493	INSIDE
chr6:026770388-026770447	A_17_P04627047	chr6	26770388	111.624	12.1569	3.19879	0.00822471	ZNF322A	NM_024639	PROMOTER
chr22:017510312-017510357	A_17_P11428227	chr22	17510312	270.715	18.5509	3.86722	0.00822571	DGCR14	NM_022719	PROMOTER
chr6:133102543-133102602	A_17_P05085136	chr6	133102543	263.147	28.6703	3.19824	0.00822685	VNN3	NM_078625	PROMOTER
chr1:112242699-112242750	A_17_P00461068	chr1	112242699	583.282	63.5575	3.19806	0.00822771	KCND3	NM_004980	INSIDE
chr1:018182371-018182415	A_17_P15033568	chr1	18182371	184.311	20.0843	3.198	0.00822818	IGSF21	NM_032880	INSIDE
chr19:012724088-012724132	A_17_P10887207	chr19	12724088	9066.57	622.388	3.86467	0.00823268	VMD2L1	NM_017682	PROMOTER
chr1:194610314-194610373	A_17_P00711567	chr1	194610314	72.5222	7.90792	3.19705	0.00823408	LHX9	NM_001014434	PROMOTER
chr1:176932914-176932958	A_17_P00633109	chr1	176932914	2720.81	296.898	3.19599	0.0082379	LHX4	NM_033343	INSIDE
chr1:166289635-166289694	A_17_P15142498	chr1	166289635	270.392	29.5127	3.19565	0.00823972	F5	NM_000130	PROMOTER
chr20:043528355-043528414	A_17_P11187555	chr20	43528355	184.532	12.697	3.86131	0.00824347	WFDC2	NM_006103	PROMOTER
chr7:026959563-026959607	A_17_P05377921	chr7	26959563	4371.51	477.501	3.19455	0.00824505	HOXA6	NM_024014	INSIDE
chr9:107328763-107328807	A_17_P06881131	chr9	107328763	4314.63	471.438	3.1941	0.00824731	KLF4	NM_004235	INSIDE
chrX:011916100-011916150	A_17_P11591927	chrX	11916100	221.51	15.2634	3.85922	0.00824902	PDZD10	NM_014728	PROMOTER
chr8:120291300-120291344	A_17_P06424096	chr8	120291300	820.09	89.6341	3.19366	0.00824951	MAL2	NM_052886	INSIDE
chr3:046228593-046228652	A_17_P02213994	chr3	46228593	193.794	21.1848	3.19342	0.00825085	CCR1	NM_001295	PROMOTER
chr8:097241511-097241570	A_17_P06316334	chr8	97241511	246.473	26.9451	3.19333	0.00825129	GDF6	NM_001001557	INSIDE
chr17:044228106-044228165	A_17_P10351270	chr17	44228106	1987.92	137.1	3.85796	0.00825214	TTLL6	NM_173623	PROMOTER
chr3:190830918-190830977	A_17_P02849659	chr3	190830918	133.345	14.5787	3.19322	0.00825224	TP73L	NM_003722	PROMOTER
chr11:129825349-129825393	A_17_P08120187	chr11	129825349	25.3679	1.73448	3.87043	0.00825458	ADAMTS15	NM_139055	INSIDE
chr1:158361562-158361621	A_17_P00550242	chr1	158361562	392.212	42.9003	3.19258	0.00825497	FCGR2B	NM_001002273	PROMOTER
chr2:095114908-095114952	A_17_P01340396	chr2	95114908	4547.03	497.417	3.19239	0.00825581	MAL	NM_002371	INSIDE
chr11:032773246-032773305	A_17_P07736064	chr11	32773246	248.151	17.1307	3.85656	0.00825653	LOC493860	NM_001008391	PROMOTER
chr7:156300429-156300475	A_17_P05895703	chr7	156300429	1242.03	135.959	3.19146	0.00826048	HLXB9	NM_005515	INSIDE
chr14:098809853-098809912	A_17_P09508994	chr14	98809853	381.182	26.3601	3.85405	0.00826375	BCL11B	NM_138576	PROMOTER
chr5:037871078-037871122	A_17_P15684079	chr5	37871078	4399.28	481.79	3.19079	0.00826381	GDNF	NM_199234	PROMOTER
chr1:243910260-243910309	A_17_P00928914	chr1	243910260	420.87	46.095	3.19069	0.00826437	CIAS1	NM_004895	INSIDE
chr3:193611642-193611693	A_17_P02862332	chr3	193611642	721.7	79.0447	3.19066	0.00826449	FGF12	NM_021032	PROMOTER
chr9:093795534-093795593	A_17_P06825038	chr9	93795534	966.123	105.844	3.19027	0.00826641	BARX1	NM_021570	INSIDE
chr18:003839925-003839984	A_17_P17033240	chr18	3839925	120.677	8.34871	3.85346	0.00826857	DLGAP1	NM_001003809	PROMOTER
chr17:035019323-035019382	A_17_P10314860	chr17	35019323	500.237	34.6586	3.85133	0.00827162	NEUROD2	NM_006160	PROMOTER
chr16:081217978-081218023	A_17_P10151822	chr16	81217978	499.452	34.6399	3.84984	0.00827601	CDH13	NM_001257	PROMOTER
chr4:037277619-037277663	A_17_P03044494	chr4	37277619	244.941	26.8779	3.18794	0.00827816	BC037906	NONE	Unknown
chr17:071815145-071815189	A_17_P17017838	chr17	71815145	101.957	7.07653	3.84877	0.00828152	QRICH2	NM_032134	INSIDE
chr15:038391477-038391532	A_17_P09606715	chr15	38391477	160.064	11.1206	3.84735	0.00828422	PLCB2	NM_004573	PROMOTER
chr6:032299475-032299519	A_17_P04646756	chr6	32299475	7894.4	867.442	3.18599	0.00828787	NOTCH4	NM_004557	INSIDE
chr7:020600427-020600484	A_17_P15915797	chr7	20600427	1121.14	123.2	3.18589	0.00828839	SP8	NM_198956	PROMOTER
chrY:002603819-002603866	A_17_P15000378	chrY	2603819	377.639	26.2685	3.8456	0.00828853	CD99	NM_002414	INSIDE
chr3:144319771-144319830	A_17_P02636310	chr3	144319771	1734.3	190.591	3.1858	0.00828884	CHST2	NM_004267	PROMOTER
chr4:002387062-002387106	A_17_P15534900	chr4	2387062	342.321	37.6335	3.18526	0.00829164	ZFYVE28	NM_020972	INSIDE
chr2:019481245-019481301	A_17_P01026158	chr2	19481245	691.152	75.9905	3.18511	0.00829231	OSR1	NM_145260	PROMOTER
chr8:023768061-023768120	A_17_P06012284	chr8	23768061	236.986	26.0564	3.18509	0.00829262	STC1	NM_003155	INSIDE
chr6:001255995-001256054	A_17_P04506426	chr6	1255995	360.465	39.635	3.18501	0.00829287	FOXQ1	NM_033260	PROMOTER
chr3:179732871-179732930	A_17_P02799877	chr3	179732871	18.74	2.05443	3.18931	0.0082932	KCNMB2	NM_181361	PROMOTER
chr1:087510109-087510168	A_17_P00355712	chr1	87510109	489.621	53.8457	3.18476	0.00829408	LMO4	NM_006769	INSIDE
chr12:055978657-055978716	A_17_P08377137	chr12	55978657	33.9766	2.35456	3.85101	0.00829786	R3HDM2	NM_014925	PROMOTER
chr5:180100496-180100555	A_17_P04498848	chr5	180100496	350.835	38.6078	3.18383	0.00829883	OR2Y1	NM_001001657	PROMOTER
chr14:028305303-028305362	A_17_P09191420	chr14	28305303	263.629	18.3838	3.842	0.00829946	FOXG1B	NM_005249	PROMOTER
chr8:019843587-019843646	A_17_P05993961	chr8	19843587	332.772	36.6257	3.18361	0.00829998	LPL	NM_000237	INSIDE
chr2:222984315-222984359	A_17_P01916994	chr2	222984315	5602.1	616.672	3.18339	0.00830097	FLJ32447	NM_153038	PROMOTER
chr5:042459891-042459950	A_17_P03899761	chr5	42459891	181.69	20.0053	3.18302	0.00830338	GHR	NM_000163	INSIDE
chr12:079600774-079600833	A_17_P08482295	chr12	79600774	131.505	9.17839	3.84073	0.00830467	MYF6	NM_002469	PROMOTER
chr4:154217489-154217544	A_17_P03535658	chr4	154217489	151.718	16.7087	3.18272	0.00830501	KIAA1727	NM_033393	PROMOTER
chr19:040431595-040431645	A_17_P10946998	chr19	40431595	149.38	10.4298	3.8402	0.00830575	LSR	NM_015925	INSIDE
chr20:060812025-060812076	A_17_P11261945	chr20	60812025	730.63	51.0395	3.83946	0.00830652	NTSR1	NM_002531	INSIDE
chr12:051528308-051528361	A_17_P08356858	chr12	51528308	493.949	34.5086	3.83933	0.00830689	K5B	NM_173352	INSIDE
chr6:126112793-126112840	A_17_P05050124	chr6	126112793	228.944	25.2246	3.18209	0.00830769	HEY2	NM_012259	INSIDE
chr2:027398623-027398667	A_17_P01063270	chr2	27398623	3274.78	360.951	3.18152	0.00831039	SLC30A3	NM_003459	PROMOTER
chr20:054640417-054640470	A_17_P11230980	chr20	54640417	374.529	26.1876	3.83812	0.00831062	TFAP2C	NM_003222	INSIDE
chr1:203650954-203651008	A_17_P00754310	chr1	203650954	552.152	60.8619	3.18145	0.00831079	C4BPB	NM_001017367	PROMOTER
chr6:010045097-010045149	A_17_P04547737	chr6	10045097	273.769	30.1787	3.18136	0.00831127	OFCC1	NM_153003	INSIDE
chr10:011247291-011247346	A_17_P07072769	chr10	11247291	367.893	40.5743	3.18065	0.00831507	CUGBP2	NM_001025076	INSIDE
chr2:026984629-026984673	A_17_P01061151	chr2	26984629	289.67	31.9485	3.18059	0.00831523	DPYSL5	NM_020134	INSIDE
chr9:074931185-074931244	A_17_P06744006	chr9	74931185	137.983	15.2193	3.18052	0.00831592	C9orf95	NM_017881	INSIDE
chr16:085098609-085098653	A_17_P10170292	chr16	85098609	620.6	43.4708	3.83555	0.00831813	FOXF1	NM_001451	PROMOTER
chr1:244789852-244789911	A_17_P00931823	chr1	244789852	167.212	18.4676	3.17861	0.00832549	OR2T12	NM_001004692	PROMOTER
chr19:054635393-054635442	A_17_P10986586	chr19	54635393	7478.29	524.767	3.83296	0.00832577	SLC17A7	NM_020309	INSIDE
chr1:110862348-110862399	A_17_P00455193	chr1	110862348	1812.16	200.17	3.17841	0.00832616	KCNA2	NM_004974	PROMOTER
chr4:076215884-076215928	A_17_P03188656	chr4	76215884	496.624	54.8654	3.17819	0.00832734	DKFZP564O0823	NM_015393	INSIDE
chr12:045761534-045761593	A_17_P08331966	chr12	45761534	192.83	13.5378	3.83226	0.00832834	AMIGO2	NM_181847	PROMOTER
chr1:211644205-211644249	A_17_P00791597	chr1	211644205	4288.57	473.858	3.17797	0.00832841	KCNK2	NM_014217	PROMOTER
chr2:233178973-233179017	A_17_P01963143	chr2	233178973	109.838	12.1452	3.17692	0.00833436	ECEL1	NM_004826	PROMOTER
chr3:188492575-188492634	A_17_P02837933	chr3	188492575	256.708	28.3893	3.17671	0.00833493	MASP1	NM_001031849	PROMOTER
chr4:166319775-166319834	A_17_P03591361	chr4	166319775	304.629	33.6926	3.17655	0.00833575	TRIM60	NM_152620	INSIDE
chr3:140150837-140150885	A_17_P02617876	chr3	140150837	2016.76	223.096	3.1763	0.00833689	FOXL2	NM_023067	PROMOTER
chr7:115735179-115735238	A_17_P05717449	chr7	115735179	312.977	34.6223	3.17629	0.00833706	CAV2	NM_001233	INSIDE
chr19:056047617-056047669	A_17_P10990878	chr19	56047617	241.257	16.9736	3.82921	0.0083372	KLK3	NM_001030047	PROMOTER
chr17:010216683-010216742	A_17_P10226128	chr17	10216683	138.946	9.78081	3.82842	0.00834083	MYH13	NM_003802	INSIDE
chr3:010832577-010832623	A_17_P02057638	chr3	10832577	234.379	25.9409	3.17555	0.00834085	SLC6A11	NM_014229	PROMOTER
chr8:057396651-057396695	A_17_P06136977	chr8	57396651	2833.13	313.602	3.17539	0.00834154	RDHE2	NM_138969	PROMOTER
chr17:071584182-071584226	A_17_P10469236	chr17	71584182	3175.99	223.709	3.82751	0.00834209	GALR2	NM_003857	INSIDE
chr7:156308089-156308140	A_17_P05895743	chr7	156308089	2735.48	302.891	3.17492	0.00834391	HLXB9	NM_005515	PROMOTER
chr7:026979493-026979541	A_17_P05378088	chr7	26979493	1572.73	174.164	3.17475	0.00834479	HOXA9	NM_152739	PROMOTER
chr5:000579383-000579427	A_17_P03710176	chr5	579383	2014.41	223.076	3.17475	0.0083448	SLC9A3	NM_004174	PROMOTER
chr3:154035655-154035699	A_17_P15501310	chr3	154035655	63.6018	7.04382	3.17464	0.00834674	P2RY1	NM_002563	INSIDE
chr6:001337561-001337620	A_17_P15777136	chr6	1337561	2030.42	224.916	3.17432	0.00834699	FOXF2	NM_001452	INSIDE
chr16:085157337-085157391	A_17_P10170659	chr16	85157337	231.368	16.3117	3.82621	0.00834699	FOXC2	NM_005251	PROMOTER
chr1:154777676-154777729	A_17_P00534860	chr1	154777676	1572.14	174.157	3.17427	0.00834725	KIRREL	NM_018240	INSIDE
chr6:032897418-032897477	A_17_P04648470	chr6	32897418	78.8336	8.73359	3.17416	0.00834955	HLA-DOB	NM_002120	PROMOTER
chr7:026974600-026974651	A_17_P05378046	chr7	26974600	2154.77	238.81	3.1736	0.00835067	HOXA7	NM_006896	PROMOTER
chr14:022721046-022721105	A_17_P09166818	chr14	22721046	3360.17	237.171	3.82453	0.00835103	SLC7A8	NM_012244	INSIDE
chr11:117593307-117593366	A_17_P08062758	chr11	117593307	458.7	32.3888	3.82398	0.00835277	AMICA1	NM_153206	PROMOTER
chr6:132956898-132956957	A_17_P15863034	chr6	132956898	114.927	12.7385	3.17345	0.00835279	TAAR5	NM_003967	PROMOTER
chr16:025608925-025608980	A_17_P09970678	chr16	25608925	419.217	29.6028	3.82389	0.00835314	HS3ST4	NM_006040	PROMOTER
chr10:124892917-124892961	A_17_P07539292	chr10	124892917	9548.19	674.6	3.82312	0.00835528	HMX2	NM_005519	PROMOTER
chr6:001260192-001260251	A_17_P04506453	chr6	1260192	328.471	36.4355	3.17235	0.00835715	FOXQ1	NM_033260	DOWNSTREAM
chr1:150047856-150047915	A_17_P00515445	chr1	150047856	2060.32	228.582	3.17208	0.00835843	LOR	NM_000427	DOWNSTREAM
chr4:076212372-076212431	A_17_P03188639	chr4	76212372	8.5568	0.876495	3.28725	0.0083589	DKFZP564O0823	NM_015393	PROMOTER
chr6:133118699-133118758	A_17_P15863129	chr6	133118699	382.751	42.4871	3.17131	0.00836244	VNN2	NM_004665	INSIDE
chr11:006905408-006905467	A_17_P07621117	chr11	6905408	525.863	37.215	3.82073	0.0083626	ZNF215	NM_013250	INSIDE
chr14:036122638-036122693	A_17_P09227361	chr14	36122638	343.254	24.294	3.82061	0.00836317	NKX2-8	NM_014360	PROMOTER
chr7:026937751-026937795	A_17_P05377742	chr7	26937751	5506.92	611.567	3.17066	0.00836568	HOXA3	NM_030661	PROMOTER
chr15:071446193-071446239	A_17_P09755399	chr15	71446193	2897.52	205.225	3.81954	0.0083661	HCN4	NM_005477	INSIDE
chr11:055342244-055342303	A_17_P07806947	chr11	55342244	171.943	12.1915	3.81798	0.00837182	OR5D18	NM_001001952	PROMOTER
chr9:022436784-022436829	A_17_P06642798	chr9	22436784	119.984	13.3352	3.16953	0.00837199	DMRTA1	NM_022160	PROMOTER
chr17:004351169-004351216	A_17_P10201660	chr17	4351169	297.148	21.0804	3.8172	0.00837348	BC041772	NONE	Unknown
chr7:026984725-026984776	A_17_P05378134	chr7	26984725	1755.19	195.164	3.16887	0.0083749	HOXA10	NM_018951	INSIDE
chr18:075263231-075263277	A_17_P10846118	chr18	75263231	875.034	62.1119	3.8164	0.00837566	NFATC1	NM_172390	INSIDE
chr12:003469590-003469649	A_17_P08161538	chr12	3469590	318.483	22.6071	3.81637	0.00837609	HRMT1L4	NM_019854	PROMOTER
chr11:020648534-020648588	A_17_P07682401	chr11	20648534	266.207	18.9045	3.81575	0.00837811	NELL1	NM_006157	INSIDE
chr2:031716583-031716642	A_17_P01084494	chr2	31716583	309.868	34.484	3.16765	0.00838121	SRD5A2	NM_000348	INSIDE
chr7:027054505-027054555	A_17_P05378628	chr7	27054505	2337.78	260.255	3.16714	0.00838379	EVX1	NM_001989	PROMOTER
chr6:124164803-124164862	A_17_P05040108	chr6	124164803	293.282	32.6511	3.16709	0.0083842	TCBA1	NM_153355	PROMOTER
chr8:012852716-012852764	A_17_P05960928	chr8	12852716	532.303	59.2811	3.1666	0.00838659	FLJ36980	NM_182598	PROMOTER
chr3:042284876-042284935	A_17_P02196104	chr3	42284876	409.117	45.5817	3.16599	0.00838983	CCK	NM_000729	PROMOTER
chr2:228872445-228872504	A_17_P01945139	chr2	228872445	73.3883	8.17569	3.16614	0.00839098	SKIP	NM_030623	PROMOTER
chr3:186352265-186352324	A_17_P02828719	chr3	186352265	37.0646	4.12793	3.16655	0.00839241	LOC285382	NM_001025266	INSIDE
chr3:100839360-100839408	A_17_P02444195	chr3	100839360	785.092	87.5165	3.16524	0.00839362	COL8A1	NM_001850	PROMOTER
chr2:073053653-073053697	A_17_P01275172	chr2	73053653	1501.39	167.416	3.16479	0.0083959	EMX1	NM_004097	PROMOTER
chr8:143544285-143544329	A_17_P16144434	chr8	143544285	178.398	19.9049	3.1639	0.0084008	BAI1	NM_001702	INSIDE
chr17:045399085-045399138	A_17_P10356378	chr17	45399085	1500.65	107.155	3.80782	0.00840181	DLX4	NM_138281	PROMOTER
chr17:014147734-014147790	A_17_P10244031	chr17	14147734	1255.58	89.6678	3.80762	0.00840244	HS3ST3B1	NM_006041	INSIDE
chr20:023013474-023013518	A_17_P11118246	chr20	23013474	386.578	27.6154	3.80722	0.00840388	C1QR1	NM_012072	INSIDE
chr10:102493263-102493320	A_17_P07429929	chr10	102493263	411.547	29.411	3.80663	0.00840558	PAX2	NM_000278	PROMOTER
chr9:000258557-000258616	A_17_P16152217	chr9	258557	114.038	12.7326	3.16291	0.0084062	DOCK8	NM_203447	PROMOTER
chr6:170520852-170520898	A_17_P15895195	chr6	170520852	1913.98	213.736	3.16267	0.00840686	DLL1	NM_005618	PROMOTER
chr1:063499018-063499067	A_17_P00247034	chr1	63499018	1468.4	164.022	3.16228	0.00840888	FOXD3	NM_012183	PROMOTER
chr18:017998578-017998637	A_17_P10565430	chr18	17998578	517.48	37.0101	3.80551	0.00840899	GATA6	NM_005257	PROMOTER
chr12:052614196-052614248	A_17_P08361872	chr12	52614196	544.206	38.9494	3.80448	0.0084122	HOXC13	NM_017410	PROMOTER
chr2:010813652-010813711	A_17_P00986514	chr2	10813652	1062.64	118.801	3.16103	0.00841538	ATP6V1C2	NM_144583	INSIDE
chr2:119324778-119324837	A_17_P01432365	chr2	119324778	528.957	59.1409	3.16092	0.00841598	EN1	NM_001426	PROMOTER
chr1:110863301-110863352	A_17_P00455201	chr1	110863301	5453.98	609.821	3.16085	0.00841629	KCNA2	NM_004974	PROMOTER
chr6:128888191-128888250	A_17_P05064363	chr6	128888191	290.984	32.5482	3.16029	0.00841932	PTPRK	NM_002844	PROMOTER
chr5:076968243-076968288	A_17_P15712773	chr5	76968243	2190.69	245.142	3.15969	0.00842232	OTP	NM_032109	INSIDE
chr2:222983826-222983885	A_17_P01916989	chr2	222983826	2712.93	303.606	3.15958	0.00842294	FLJ32447	NM_153038	PROMOTER
chr11:044292241-044292285	A_17_P07786757	chr11	44292241	642.998	46.1355	3.80086	0.00842334	ALX4	NM_021926	PROMOTER
chr4:030398424-030398476	A_17_P03014061	chr4	30398424	282.683	31.637	3.1595	0.00842349	PCDH7	NM_032456	INSIDE
chr13:027392885-027392929	A_17_P08741003	chr13	27392885	292.023	20.9538	3.8008	0.00842369	IPF1	NM_000209	INSIDE
chr21:030234411-030234466	A_17_P11342865	chr21	30234411	359.528	25.8116	3.80001	0.00842611	GRIK1	NM_000830	PROMOTER
chr9:000963178-000963222	A_17_P16152684	chr9	963178	340.809	38.1593	3.15886	0.00842675	DMRT3	NM_021240	PROMOTER
chr6:007674384-007674440	A_17_P04536915	chr6	7674384	2958.71	331.317	3.15869	0.00842756	BMP6	NM_001718	INSIDE
chr4:082483921-082483980	A_17_P03216733	chr4	82483921	156.071	17.4792	3.15849	0.00842885	PRKG2	NM_006259	PROMOTER
chr19:059547136-059547195	A_17_P10999955	chr19	59547136	433.639	31.155	3.79896	0.00842931	LILRA4	NM_012276	PROMOTER
chr5:159274286-159274345	A_17_P04409233	chr5	159274286	203.618	22.8074	3.15829	0.00842989	ADRA1B	NM_000679	PROMOTER
chr6:031196335-031196379	A_17_P04642516	chr6	31196335	2457.02	275.234	3.15818	0.00843021	CDSN	NM_001264	PROMOTER
chr7:026917185-026917239	A_17_P15920058	chr7	26917185	2885.2	323.236	3.15801	0.00843109	HOXA2	NM_006735	PROMOTER
chr5:134942120-134942164	A_17_P15743247	chr5	134942120	331.699	37.1617	3.15799	0.0084313	CXCL14	NM_004887	INSIDE
chr1:044548715-044548774	A_17_P00171650	chr1	44548715	1042.12	116.77	3.15778	0.00843227	C1orf164	NM_018150	INSIDE
chr6:004718691-004718750	A_17_P04522594	chr6	4718691	349.316	39.1414	3.15777	0.0084325	CDYL	NM_170751	PROMOTER
chr17:052026725-052026769	A_17_P10384907	chr17	52026725	334.808	24.0735	3.79782	0.00843292	NOG	NM_005450	INSIDE
chr4:075595699-075595747	A_17_P03186050	chr4	75595699	1347.19	151.018	3.15715	0.00843557	EREG	NM_001432	PROMOTER
chr6:075973052-075973096	A_17_P04825690	chr6	75973052	191.901	21.5215	3.15652	0.00843906	COL12A1	NM_080645	PROMOTER
chr3:135999350-135999407	A_17_P02601126	chr3	135999350	788.617	88.4602	3.15622	0.00844041	EPHB1	NM_004441	INSIDE
chr2:000276495-000276554	A_17_P00934522	chr2	276495	181.764	20.3891	3.1562	0.00844078	LOC285016	NM_001002919	INSIDE
chr9:122500191-122500250	A_17_P16260896	chr9	122500191	181.764	20.3891	3.1562	0.00844088	OR1L1	NM_001005236	PROMOTER
chr12:064506611-064506670	A_17_P08413330	chr12	64506611	232.655	16.763	3.79484	0.00844235	HMGA2	NM_003484	INSIDE
chr6:007672837-007672886	A_17_P04536904	chr6	7672837	792.322	88.9134	3.15561	0.0084436	BMP6	NM_001718	INSIDE
chr9:075732503-075732562	A_17_P06747043	chr9	75732503	463.885	52.0678	3.1553	0.00844526	PCSK5	NM_006200	PROMOTER
chr1:013654402-013654450	A_17_P00051919	chr1	13654402	515.137	57.8642	3.15421	0.00845095	PDPN	NM_006474	PROMOTER
chr11:004348495-004348554	A_17_P07609528	chr11	4348495	404.645	29.2405	3.79062	0.00845514	OR52B4	NM_001005161	PROMOTER
chr6:139736394-139736439	A_17_P05117499	chr6	139736394	208.585	23.4485	3.15307	0.00845713	CITED2	NM_006079	INSIDE
chr5:172691634-172691678	A_17_P04472294	chr5	172691634	155.333	17.4624	3.15304	0.00845741	STC2	NM_003714	PROMOTER
chrX:105851811-105851870	A_17_P11869827	chrX	105851811	173.563	12.5487	3.78985	0.00845866	FLJ20298	NM_017752	PROMOTER
chrX:122822527-122822571	A_17_P11928874	chrX	122822527	288.417	20.8639	3.78908	0.00846004	STAG2	NM_006603	INSIDE
chr1:157576333-157576392	A_17_P00547356	chr1	157576333	147.886	16.6345	3.15223	0.00846177	LY9	NM_001033667	PROMOTER
chr7:016696887-016696946	A_17_P05328971	chr7	16696887	113.148	12.7267	3.15228	0.00846196	BCMP11	NM_176813	PROMOTER
chr2:240685198-240685242	A_17_P15400778	chr2	240685198	113.148	12.7267	3.15228	0.00846218	NDUFA10	NM_004544	PROMOTER
chr6:005950565-005950624	A_17_P04528577	chr6	5950565	113.148	12.7267	3.15228	0.0084628	NRN1	NM_016588	INSIDE
chr17:006555073-006555117	A_17_P10210794	chr17	6555073	428.644	31.0281	3.78813	0.0084629	SLC13A5	NM_177550	INSIDE
chr6:125342107-125342166	A_17_P05046415	chr6	125342107	228.076	25.6581	3.15202	0.00846351	IBRDC1	NM_152553	PROMOTER
chr8:114517121-114517180	A_17_P06396016	chr8	114517121	2991.79	336.622	3.15181	0.00846353	CSMD3	NM_052900	INSIDE
chr5:180396368-180396413	A_17_P04499300	chr5	180396368	4753.11	534.944	3.15141	0.0084656	BTNL9	NM_152547	PROMOTER
chr7:154747610-154747667	A_17_P05887747	chr7	154747610	1561.44	175.734	3.15141	0.00846563	EN2	NM_001427	PROMOTER
chr10:062373693-062373741	A_17_P07260600	chr10	62373693	59.4959	4.30282	3.78944	0.00846641	RHOBTB1	NM_014836	INSIDE
chr2:025303938-025303997	A_17_P01054145	chr2	25303938	450.849	50.7908	3.15	0.00847305	POMC	NM_001035256	PROMOTER
chrX:080184976-080185035	A_17_P11801803	chrX	80184976	230.293	16.7091	3.78476	0.00847373	NSBP1	NM_030763	PROMOTER
chr7:026915978-026916037	A_17_P05377576	chr7	26915978	1408.7	158.802	3.14906	0.00847799	HOXA2	NM_006735	PROMOTER
chr10:026542245-026542290	A_17_P07139550	chr10	26542245	606.302	68.3607	3.1488	0.00847939	GAD2	NM_000818	PROMOTER
chr6:001337174-001337233	A_17_P04506781	chr6	1337174	1822.46	205.534	3.14844	0.00848126	FOXF2	NM_001452	INSIDE
chr9:000490660-000490719	A_17_P06539919	chr9	490660	372.797	42.0457	3.14836	0.00848179	ANKRD15	NM_015158	PROMOTER
chr11:005281819-005281878	A_17_P07613828	chr11	5281819	152.002	11.0525	3.78164	0.00848435	OR51B4	NM_033179	PROMOTER
chr17:036182019-036182078	A_17_P10320426	chr17	36182019	147.379	10.7173	3.78152	0.00848465	KRT25B	NM_181539	PROMOTER
chr13:111766966-111767025	A_17_P09141987	chr13	111766966	477.641	34.7426	3.78115	0.00848482	SOX1	NM_005986	PROMOTER
chr2:222992886-222992930	A_17_P01917056	chr2	222992886	2237.28	252.453	3.14766	0.00848538	PAX3	NM_013942	PROMOTER
chr2:119322039-119322097	A_17_P01432341	chr2	119322039	1175.85	132.683	3.14765	0.00848544	EN1	NM_001426	PROMOTER
chr6:075972612-075972658	A_17_P04825688	chr6	75972612	1310.79	147.924	3.14751	0.00848614	COL12A1	NM_080645	PROMOTER
chrX:048798973-048799017	A_17_P11743132	chrX	48798973	161.587	11.7615	3.78017	0.0084886	LMO6	NM_006150	INSIDE
chr6:101021137-101021196	A_17_P04935946	chr6	101021137	2087.55	235.66	3.14703	0.00848869	SIM1	NM_005068	PROMOTER
chr2:010813765-010813810	A_17_P00986515	chr2	10813765	2360.89	266.55	3.14685	0.00848965	ATP6V1C2	NM_144583	INSIDE
chr19:056823124-056823168	A_17_P10993703	chr19	56823124	15336.7	1116.9	3.77942	0.00849011	SIGLEC5	NM_003830	INSIDE
chr7:027001709-027001761	A_17_P05378258	chr7	27001709	1174.97	132.667	3.14675	0.0084902	HOXA11	NM_005523	PROMOTER
chr11:059038732-059038785	A_17_P07820317	chr11	59038732	172.065	12.5301	3.77948	0.00849098	OR4D9	NM_001004711	PROMOTER
chr12:045916423-045916478	A_17_P08332614	chr12	45916423	399.51	29.1057	3.77886	0.00849204	MGC16044	NM_138371	INSIDE
chr7:076806685-076806744	A_17_P05541342	chr7	76806685	28.277	3.1828	3.15126	0.00849438	PTPN12	NM_002835	PROMOTER
chr8:107852296-107852355	A_17_P06364592	chr8	107852296	143.617	16.2272	3.14574	0.00849605	ABRA	NM_139166	PROMOTER
chr4:001137584-001137643	A_17_P02888633	chr4	1137584	1155.14	130.594	3.1449	0.00849995	FLJ35816	NM_207489	DOWNSTREAM
chr7:142621049-142621108	A_17_P05840384	chr7	142621049	239.949	27.1432	3.14406	0.0085045	EPHA1	NM_005232	INSIDE
chr1:178186344-178186389	A_17_P00638484	chr1	178186344	603.14	68.2342	3.14393	0.00850515	CACNA1E	NM_000721	INSIDE
chr17:036209201-036209260	A_17_P10320570	chr17	36209201	151.193	11.0455	3.77486	0.00850551	KRT25D	NM_181535	INSIDE
chr7:027016413-027016457	A_17_P05378381	chr7	27016413	4062.9	459.668	3.14384	0.00850556	HOXA13	NM_000522	PROMOTER
chr5:002810073-002810132	A_17_P03721143	chr5	2810073	361.494	40.9053	3.14361	0.00850685	CEI	NM_178569	DOWNSTREAM
chrX:082568983-082569042	A_17_P11806406	chrX	82568983	160.801	11.7536	3.7741	0.00850788	POU3F4	NM_000307	PROMOTER
chrX:099989864-099989908	A_17_P11850589	chrX	99989864	160.801	11.7536	3.7741	0.00850834	XKRX	NM_212559	INSIDE
chr3:130806713-130806757	A_17_P02578954	chr3	130806713	261.772	29.6279	3.14328	0.0085087	PLXND1	NM_015103	INSIDE
chr19:056105127-056105171	A_17_P10991139	chr19	56105127	1629.49	119.152	3.77355	0.00850872	KLK4	NM_004917	INSIDE
chr1:154550384-154550437	A_17_P00533896	chr1	154550384	254.301	28.7848	3.14316	0.00850933	FCRL2	NM_138738	INSIDE
chr3:154038245-154038304	A_17_P02682536	chr3	154038245	38.8802	4.39812	3.14408	0.00851021	P2RY1	NM_002563	INSIDE
chr2:222984478-222984523	A_17_P01916996	chr2	222984478	1885.59	213.493	3.14276	0.00851132	FLJ32447	NM_153038	PROMOTER
chr10:135230009-135230067	A_17_P07593635	chr10	135230009	195.895	14.3342	3.77255	0.0085127	CYP2E1	NM_000773	INSIDE
chr7:020599692-020599751	A_17_P15915791	chr7	20599692	398	45.0879	3.14196	0.00851564	SP8	NM_182700	INSIDE
chr6:010523879-010523938	A_17_P15784722	chr6	10523879	2700.93	306.071	3.14152	0.00851793	TFAP2A	NM_003220	PROMOTER
chr20:041250260-041250314	A_17_P11179262	chr20	41250260	226.736	16.6273	3.76939	0.00852263	PTPRT	NM_007050	INSIDE
chr14:028299541-028299600	A_17_P09191378	chr14	28299541	335.769	24.6263	3.76919	0.00852288	FOXG1B	NM_005249	PROMOTER
chr4:041590742-041590801	A_17_P03062881	chr4	41590742	238.922	27.0967	3.14036	0.00852432	PHOX2B	NM_003924	INSIDE
chr12:003471202-003471246	A_17_P08161546	chr12	3471202	445.229	32.6663	3.76867	0.00852445	HRMT1L4	NM_019854	INSIDE
chr7:031501571-031501630	A_17_P05400631	chr7	31501571	308.401	34.9804	3.14019	0.00852506	C7orf16	NM_006658	INSIDE
chr8:127640218-127640277	A_17_P06456244	chr8	127640218	149.82	16.9988	3.13972	0.00852796	FAM84B	NM_174911	PROMOTER
chr20:017986871-017986916	A_17_P11094278	chr20	17986871	165.027	12.1162	3.76769	0.00852846	OVOL2	NM_021220	PROMOTER
chr6:144650276-144650335	A_17_P05139013	chr6	144650276	117.339	13.3162	3.13943	0.00852954	UTRN	NM_007124	PROMOTER
chr7:026967667-026967726	A_17_P05377994	chr7	26967667	506.359	57.4809	3.13901	0.00853136	HOXA7	NM_006896	INSIDE
chr2:176780513-176780571	A_17_P01695048	chr2	176780513	536.962	60.9819	3.13837	0.00853476	HOXD13	NM_000523	PROMOTER
chr17:070431896-070431940	A_17_P10464353	chr17	70431896	431.104	31.7035	3.76532	0.00853513	USH1G-OTOP2	NM_173477-NM_178160	DIVERGENT_PROMOTER
chr1:149296296-149296347	A_17_P00512215	chr1	149296296	415.44	47.1837	3.13828	0.00853523	LCE5A	NM_178438	PROMOTER
chr7:026936247-026936297	A_17_P05377731	chr7	26936247	2693.23	306.026	3.13761	0.00853875	HOXA3	NM_030661	PROMOTER
chr1:044547776-044547830	A_17_P00171642	chr1	44547776	3703.06	420.879	3.13724	0.00854075	C1orf164	NM_018150	INSIDE
chr4:175820090-175820149	A_17_P15639887	chr4	175820090	259.813	29.5396	3.13675	0.00854345	HPGD	NM_000860	PROMOTER
chr6:075973422-075973469	A_17_P04825692	chr6	75973422	5660.64	643.805	3.13627	0.00854595	COL12A1	NM_080645	PROMOTER
chr12:093047033-093047077	A_17_P08543181	chr12	93047033	193.932	14.2937	3.7621	0.00854602	PLXNC1	NM_005761	INSIDE
chr6:010047539-010047598	A_17_P04547762	chr6	10047539	74.2545	8.44394	3.13649	0.00854631	OFCC1	NM_153003	INSIDE
chr14:071499324-071499383	A_17_P09380632	chr14	71499324	96.2579	7.09032	3.76298	0.00854643	RGS6	NM_004296	INSIDE
chr1:167366839-167366898	A_17_P00591392	chr1	167366839	385.968	43.9	3.13619	0.00854645	PRRX1	NM_006902	INSIDE
chr8:037671157-037671201	A_17_P06075912	chr8	37671157	198.369	22.5943	3.13415	0.00855746	ZNF703	NM_025069	PROMOTER
chr21:033319926-033319970	A_17_P11357264	chr21	33319926	2655.61	196.335	3.75766	0.00855962	OLIG2	NM_005806	PROMOTER
chr1:149786081-149786125	A_17_P00514509	chr1	149786081	164.618	18.7556	3.13373	0.00855989	SPRR3	NM_005416	PROMOTER
chr6:006265882-006265934	A_17_P04529936	chr6	6265882	607.16	69.1877	3.13349	0.00856094	F13A1	NM_000129	PROMOTER
chr6:010518138-010518182	A_17_P15784696	chr6	10518138	1219.53	138.974	3.13344	0.00856117	TFAP2A	NM_001032280	INSIDE
chr17:043981811-043981870	A_17_P10349901	chr17	43981811	342.633	25.3566	3.75623	0.0085645	HOXB3	NM_002146	INSIDE
chr5:032745820-032745879	A_17_P03858118	chr5	32745820	61.704	7.03358	3.13303	0.00856606	NPR3	NM_000908	PROMOTER
chr11:004344745-004344804	A_17_P07609499	chr11	4344745	207.482	15.3628	3.75547	0.0085673	OR52B4	NM_001005161	DOWNSTREAM
chr8:086321816-086321875	A_17_P06267792	chr8	86321816	106.275	12.1195	3.13241	0.00856746	E2F5	NM_001951	DOWNSTREAM
chr7:099170169-099170228	A_17_P05645480	chr7	99170169	624.332	71.2121	3.13212	0.00856825	GJE1	NM_181538	INSIDE
chr21:044489650-044489701	A_17_P11411442	chr21	44489650	517.087	38.3146	3.75444	0.0085702	ICOSLG	NM_015259	PROMOTER
chr12:052670559-052670618	A_17_P08362340	chr12	52670559	1342.46	99.4893	3.75419	0.00857085	hsa-mir-196a-2	hsa-mir-196a-2	PROMOTER
chr1:063497645-063497703	A_17_P00247026	chr1	63497645	554.292	63.2488	3.13154	0.00857141	FOXD3	NM_012183	PROMOTER
chr1:176933440-176933495	A_17_P00633114	chr1	176933440	2610.67	297.951	3.13127	0.00857282	LHX4	NM_033343	INSIDE
chr18:013873964-013874023	A_17_P10559551	chr18	13873964	223.161	16.5441	3.75369	0.00857288	MC2R	NM_000529	INSIDE
chr12:005928873-005928932	A_17_P08173816	chr12	5928873	223.161	16.5441	3.75369	0.00857311	VWF	NM_000552	INSIDE
chr7:026976403-026976462	A_17_P05378065	chr7	26976403	2462.68	281.126	3.13094	0.00857461	HOXA9	NM_152739	INSIDE
chr16:085165198-085165254	A_17_P10170718	chr16	85165198	878.35	65.1517	3.75292	0.00857499	FOXL1	NM_005250	PROMOTER
chr6:027990986-027991045	A_17_P04630460	chr6	27990986	24.7978	2.82283	3.135	0.00857518	OR2B2	NM_033057	PROMOTER
chr7:026935787-026935833	A_17_P05377726	chr7	26935787	3229.18	368.692	3.13068	0.008576	HOXA3	NM_030661	PROMOTER
chrX:050388140-050388187	A_17_P11748221	chrX	50388140	240.166	17.8189	3.75255	0.00857681	KIAA1202	NM_020717	INSIDE
chrX:107485274-107485333	A_17_P11876867	chrX	107485274	109.207	8.1039	3.7523	0.00857985	COL4A6	NM_033641	INSIDE
chr12:051297123-051297173	A_17_P08355360	chr12	51297123	363.88	27.0254	3.75108	0.00858125	K6IRS3	NM_175068	INSIDE
chr1:063498496-063498552	A_17_P00247032	chr1	63498496	1535.25	175.427	3.12953	0.00858222	FOXD3	NM_012183	PROMOTER
chr7:026985108-026985154	A_17_P05378138	chr7	26985108	2084.6	238.206	3.12948	0.00858246	HOXA10	NM_018951	INSIDE
chr17:045007222-045007272	A_17_P10354308	chr17	45007222	276.967	20.5747	3.75077	0.00858281	NXPH3	NM_007225	PROMOTER
chr12:007832595-007832654	A_17_P08181075	chr12	7832595	239.595	17.805	3.75024	0.00858418	NANOG	NM_024865	PROMOTER
chr12:051459436-051459495	A_17_P08356431	chr12	51459436	198.905	14.7809	3.75028	0.00858434	KRT2B	NM_015848	PROMOTER
LACC:GD32C_8_r	LACC:GD32C_8_r	NONE	NONE	116.451	13.3103	3.12911	0.0085852	LACC:GD32C_8_r	NONE	NONE
chr18:075258430-075258474	A_17_P10846091	chr18	75258430	362.991	27.0007	3.74886	0.00858837	NFATC1	NM_172387	PROMOTER
chr6:001334085-001334137	A_17_P04506767	chr6	1334085	582.46	66.6174	3.12819	0.00858948	FOXF2	NM_001452	PROMOTER
chr14:057686426-057686485	A_17_P09319710	chr14	57686426	221.965	16.5161	3.74839	0.00859083	C14orf37	NM_001001872	INSIDE
[truncated: 34,923 more rows]
