# Supplementary material for: Genome-Wide Profiling of Histone H3 Lysine 4 and Lysine 27 Trimethylation Reveals an Epigenetic Signature in Prostate Carcinogenesis
Source: PLoS One. 2009 Mar 5;4(3):e4687. doi: 10.1371/journal.pone.0004687 (PMC2650415; doi:10.1371/journal.pone.0004687)
Supplement: Table S6 — Genes with H3K4me3, H3K4K27me3, H3K27me3 and Neither marks in X chromosome (0.05 MB XLS) [file pone.0004687.s007.xls]

## Sheet: Gene list in X chromosome
	PC3					EP156T
H3K4me3	H3K4K27me3	H3K27me3	NEITHER		H3K4me3	H3K4K27me3	H3K27me3	NEITHER
47	184	246	95		160	144	114	154
ARD1A	ABCB7	ACE2	AMELY		ACSL4	ABCB7	ACE2	ABCD1
ARSD	ABCD1	ACRC	ARHGEF6		AMMECR1	AMOT	ALAS2	ACRC
ATRX	ACSL4	AGTR2	ARR3		APEX2	AP1S2	ARHGAP6	AGTR2
CETN2	AMOT	AKAP14	BCORL2		ARAF	AR	ARR3	AKAP14
CHM	AP1S2	AKAP4	BEXL1		ARD1A	ARHGAP4	ARX	AKAP4
CSAG1	APEX2	ALAS2	CD24		ARHGEF9	ARHGEF6	ASB11	AMELX
CXorf15	ARAF	AMELX	CLIC2		ARMCX5	ARMCX1	ASB9	AMELY
CXorf39	ARHGAP4	AMMECR1	COX7B		ARMCX6	ARMCX2	ATP11C	ARSD
DDX3X	ARHGAP6	AR	CRLF2		ASMTL	ARMCX3	ATP1B4	ARSE
EIF1AX	ARHGEF9	ARMCX1	CXorf45		ATP6AP2	BEX2	ATP2B3	ARSF
EIF2S3	ARMCX2	ARSE	CXorf52		ATRX	BGN	AVPR2	BCORL1
FANCB	ARMCX3	ARSF	CXYorf2		BCAP31	BIRC4	BCORL2	BEXL1
FLNA	ARMCX5	ARX	CYBB		BRWD3	BRS3	BEX1	BHLHB9
FTSJ1	ARMCX6	ATP1B4	CYorf14		C1GALT1C1	BTK	BMX	BMP15
GLA	ASB11	ATP2B3	CYorf15B		CD99	CA5B	CACNA1F	CCNB3
HCCS	ASB9	AVPR2	DAZ2		CDKL5	CASK	CAPN6	CDR1
HDHD1A	ASMTL	BCAP31	DMRTC1		CETN2	CHM	CD24	CLCN5
HNRPH2	ATP11C	BCORL1	DUSP21		CHST7	CNKSR2	CD40LG	CLDN2
LAS1L	ATP6AP2	BGN	EDA2R		COL4A5	CRSP2	CDX4	COX7B
MCTS1	BEX1	BMP15	EIF1AY		COL4A6	CSTF2	CHRDL1	CPXCR1
MOSPD2	BEX2	BMX	EMD		CXorf15	CXorf26	CITED1	CRLF2
MTMR1	BHLHB9	BRS3	ERAS		CXorf38	CXorf34	CLCN4	CSAG1
NSDHL	BIRC4	BTK	F8A1		CXorf39	CXorf45	CLIC2	CSAG2
OFD1	BRWD3	CACNA1F	FLJ20105		CXorf42	DDX3Y	CSF2RA	CT45-1
PCSK1N	C1GALT1C1	CAPN6	FOXP3		CXorf43	DIAPH2	CTAG2	CTPS2
PCTK1	CA5B	CCNB3	GDPD2		CYorf15A	DMD	CXorf20	CUL4B
PHF6	CASK	CD40LG	GLUD2		DDX26B	EDA	CXorf22	CXorf1
PIM2	CD99	CDR1	GPR112		DDX3X	EIF1AX	CXorf36	CXorf21
PIN4	CDKL5	CDX4	GPRASP1		DNASE1L1	ELF4	CXorf48	CXorf41
PIR	CHRDL1	CHST7	HCFC1		EBP	ELK1	DACH2	CXorf52
PPEF1	CITED1	CLCN4	HUWE1		EFNB1	FANCB	DAZ2	CXorf6
PRAF2	CNKSR2	CLCN5	IL3RA		EIF1AY	FGD1	DLG3	CXorf9
RBMX2	CRSP2	CLDN2	INGX		EIF2S3	GAB3	DOCK11	CXYorf2
RPL36A	CSTF2	COL4A5	ITGB1BP2		EMD	GABRE	DUSP21	CYBB
RPL9	CXorf26	COL4A6	LANCL3		FAM58A	GJB1	DUSP9	CYorf14
RPS6KA6	CXorf34	CPXCR1	MAGEA4		FMR1	GK	EDA2R	CYorf15B
SLC25A6	CXorf38	CSAG2	MAGEA5		FTSJ1	GLA	F9	CYSLTR1
SLC35A2	CXorf41	CSF2RA	MAGEA6		FUNDC1	GLRA2	FAM3A	DCX
SRY	CXorf42	CT45-1	MAGEA9		FUNDC2	GPC3	FAM9A	DDX53
SYAP1	CXorf43	CTAG2	MAGEC1		G6PD	GPM6B	FAM9C	DKC1
TAF1	CXorf48	CTPS2	MAGEC2		GNL3L	GPR34	FATE1	DMRTC1
TMLHE	DACH2	CUL4B	MAGED4		GPC4	GRIA3	FGF13	DRP2
TRAPPC2	DDX26B	CXorf1	MAP3K15		GPKOW	GSPT2	FOXP3	EFHC2
TSPAN7	DIAPH2	CXorf20	NUDT11		GRIPAP1	HDHD1A	GABRA3	ERAS
UTP14A	DLG3	CXorf21	NXF2		HCCS	HNRPH2	GABRQ	F8
UTX	DMD	CXorf22	OPN1MW		HDAC6	HPRT1	GATA1	F8A1
ZFX	DOCK11	CXorf36	OTC		HDAC8	HTR2C	GDPD2	FAM46D
	EBP	CXorf6	PAGE2		HMGB3	IDH3G	GPR101	FAM47B
	EFNB1	CXorf9	PCDH11X		HTATSF1	IL13RA1	GPR119	FAM50A
	ELF4	CYorf15A	PEPP-2		IDS	IL1RAPL2	GPR173	FHL1
	FAM9A	CYSLTR1	PFKFB1		IGBP1	IRS4	GPR174	FIGF
	FHL1	DCX	PGK1		IRAK1	KAL1	GPR23	FLJ20105
	FMR1	DDX3Y	PLCXD1		ITM2A	KIAA1166	GPR50	FLNA
	FUNDC1	DDX53	PNMA3		KIF4A	KLF8	GPR82	FMR1NB
	FUNDC2	DKC1	PPP1R2P9		KLHL15	LAS1L	GPRASP2	FTHL17
	GK	DNASE1L1	RAB40A		KLHL4	LDOC1	GUCY2F	GLUD2
	GNL3L	DRP2	RBMX		LANCL3	LHFPL1	GYG2	GPR112
	GPKOW	DUSP9	RPGR		LMO6	MAGEB6	IGSF1	GPR143
	GPR101	EDA	SHOX		MAGEB1	MAGEE1	IL13RA2	GPRASP1
	GPR50	EFHC2	SSX1		MAGED1	MAGEH1	IL1RAPL1	GRPR
	GPRASP2	ELK1	SSX2		MAGED2	MAOB	ITGB1BP2	HCFC1
	GRIA3	F8	SSX4		MAGEE2	MGC39900	L1CAM	HUWE1
	GRIPAP1	F9	SSX5		MAOA	MID1	LRCH2	IL2RG
	GSPT2	FAM3A	SSX7		MBTPS2	MID1IP1	MAGEA10	IL3RA
	HDAC6	FAM46D	SSX9		MCTS1	MORF4L2	MAGEA11	IL9R
	HDAC8	FAM47B	STS		MOSPD2	MOSPD1	MAGEA12	INGX
	HMGB3	FAM50A	SYTL5		MSL3L1	MPP1	MAGEA5	ITIH5L
	HPRT1	FAM58A	TAZ		MTM1	MSN	MAGEB10	KCND1
	HTATSF1	FAM9C	TCEAL5		MTMR1	NAP1L2	MAGEB2	KCNE1L
	HTR2C	FATE1	TDGF3		MTMR8	NAP1L3	MAGEB3	KLHL13
	IDH3G	FGD1	TLR7		NDUFA1	NDP	MAGEC3	LUZP4
	IL13RA1	FGF13	TMEM29		NDUFB11	NLGN4X	MBNL3	MAGEA1
	IRAK1	FIGF	TMSB4X		NGFRAP1	NLGN4Y	MCF2	MAGEA4
	IRS4	FMR1NB	TMSL8		NHS	NR0B1	MID2	MAGEA6
	ITM2A	FTHL17	TSPAN6		NKAP	NSBP1	NGFRAP1L1	MAGEA8
	KIAA1166	G6PD	TTTY10		NKRF	NXT2	NOX1	MAGEA9
	KIF4A	GAB3	TTTY11		NLGN3	NYX	ODZ1	MAGEC1
	KLHL13	GABRA3	TTTY12		NONO	OGT	OPN1LW	MAGEC2
	KLHL15	GABRE	TTTY13		NSDHL	OPHN1	OTC	MAGED4
	LRCH2	GABRQ	TTTY14		NUDT11	P2RY10	OTEX	MAP3K15
	MAGEA10	GATA1	TTTY5		OCRL	PABPC5	PAGE4	NUDT10
	MAGEA12	GJB1	TTTY8		OFD1	PAK3	PAGE5	NXF2
	MAGED1	GLRA2	USP9X		PDHA1	PCDH11Y	PCSK1N	NXF3
	MAGED2	GPC3	USP9Y		PHF6	PCTK1	PCYT1B	NXF5
	MAGEE1	GPC4	UTY		PHKA1	PDK3	PHEX	OPN1MW
	MAGEH1	GPM6B	VCX		PIM2	PGRMC1	PLP1	P2RY4
	MBTPS2	GPR119	VCX2		PIN4	PHF16	PNMA6A	P2RY8
	MID1IP1	GPR143	VCX3A		PIR	PHKA2	PPEF1	PAGE1
	MORF4L2	GPR173	XAGE1		PLP2	PIGA	PRRG3	PAGE2
	MOSPD1	GPR174	XAGE2		PLXNA3	PJA1	PTCHD1	PASD1
	MSL3L1	GPR23	XG		PORCN	PLS3	RAI2	PCDH11X
	NAP1L3	GPR34	ZBED1		PPP2R3B	PNMA5	RGAG1	PEPP-2
	NDP	GPR82	ZDHHC15		PRAF2	PNPLA4	RPGR	PFKFB1
	NDUFA1	GRPR	ZFY		PRDX4	POU3F4	S100G	PGK1
	NDUFB11	GUCY2F	ZXDA		PRKY	PQBP1	SERPINA7	PLAC1
	NGFRAP1L1	GYG2			PRPS2	PRKX	SLITRK2	PLCXD1
	NHS	IDS			PSMD10	PRPS1	SYTL5	PLXNB3
	NKAP	IGBP1			RAB33A	PRRG1	TCEAL2	PNMA3
	NKRF	IGSF1			RAP2C	RAB9A	TCEAL3	PPP1R2P9
	NLGN3	IL13RA2			RBM10	RAB9B	TCEAL7	PPP1R3F
	NONO	IL1RAPL1			RBM3	RNF12	TEX13B	PRY2
	NSBP1	IL1RAPL2			RBMX	RNF128	TLR7	RAB39B
	NUDT10	IL2RG			RBMX2	SCML2	TMEM35	RAB40A
	NXT2	IL9R			RNF113A	SEPT6	TNMD	RBMY1A1
	OCRL	ITIH5L			RP2	SLC10A3	TRO	RENBP
	OGT	KAL1			RPL10	SLC16A2	TRPC5	RGN
	OPHN1	KCND1			RPL36A	SLC6A14	USP26	RPA4
	PAK3	KCNE1L			RPL39	SLC7A3	VSIG1	SAGE1
	PCYT1B	KLF8			RPL9	SLC9A7	WAS	SHOX
	PDHA1	KLHL4			RPS4X	SLITRK4	WDR13	SMPX
	PGRMC1	L1CAM			RPS4Y1	SMS	XAGE5	SSX1
	PHF16	LDOC1			RPS6KA3	SOX3	XK	SSX2
	PHKA1	LHFPL1			RPS6KA6	SRPX	ZCCHC12	SSX3
	PHKA2	LMO6			RRAGB	SRPX2	ZNF185	SSX4
	PIGA	LUZP4			RS1	SRY		SSX5
	PJA1	MAGEA1			SH2D1A	SSR4		SSX6
	PLS3	MAGEA11			SH3BGRL	STARD8		SSX7
	PNPLA4	MAGEA8			SH3KBP1	SUHW3		SSX9
	PPP2R3B	MAGEB1			SLC25A14	SYN1		STS
	PRDX4	MAGEB10			SLC25A5	SYP		TAF7L
	PRKX	MAGEB2			SLC25A6	SYTL4		TAZ
	PRKY	MAGEB3			SLC35A2	TCEAL8		TCEAL5
	PRPS1	MAGEB6			SLC6A8	TIMP1		TDGF3
	PRPS2	MAGEC3			SMARCA1	TMEM28		TEX11
	PRRG1	MAGEE2			SNX12	TMEM47		TKTL1
	PSMD10	MAOA			SPIN3	TMSB4Y		TLR8
	RAB39B	MAOB			SPRY3	TMSL8		TMEM27
	RAB9A	MBNL3			STAG2	TSC22D3		TMEM29
	RAB9B	MCF2			SUV39H1	TSPAN7		TMEM31
	RAP2C	MGC39900			SYAP1	UBQLN2		TMSB4X
	RBM10	MID1			TAF1	UPF3B		TSPY1
	RNF113A	MID2			TBL1X	USP51		TSPY2
	RNF12	MPP1			TBL1Y	UTX		TTTY10
	RP2	MSN			TBX22	UTY		TTTY11
	RPL39	MTM1			TCEAL1	WDR45		TTTY12
	RPS4X	MTMR8			TCEAL4	WNK3		TTTY13
	RPS6KA3	NAP1L2			TFE3	XKRX		TTTY14
	RRAGB	NGFRAP1			TGIF2LY	ZCCHC5		TTTY5
	S100G	NLGN4X			TIMM17B	ZDHHC9		TTTY8
	SCML2	NLGN4Y			TIMM8A	ZFX		UBE2NL
	SEPT6	NOX1			TMEM32	ZFY		USP9X
	SH3BGRL	NR0B1			TMLHE	ZIC3		USP9Y
	SH3KBP1	NXF3			TRAPPC2	ZNF449		VCX
	SLC16A2	NXF5			TSPAN6	ZNF75		VCX2
	SLC25A14	NYX			TSPYL2			VGLL1
	SLITRK4	ODZ1			UBE1			VSIG4
	SMS	OPN1LW			UBE2A			XAGE1
	SNX12	OTEX			USP11			XAGE2
	SRPX	P2RY10			UTP14A			XAGE3
	SSR4	P2RY4			UXT			XG
	STAG2	P2RY8			VBP1			ZBED1
	SUHW3	PABPC5			VCX3A			ZCCHC13
	SUV39H1	PAGE1			WBP5			ZMAT1
	SYTL4	PAGE4			WDR40B			ZNF645
	TBL1X	PAGE5			WDR44
	TCEAL1	PASD1			ZBTB33
	TCEAL8	PCDH11Y			ZDHHC15
	TGIF2LY	PDK3			ZNF157
	TIMM8A	PHEX			ZNF41
	TMEM32	PLAC1			ZXDA
	TMEM35	PLP1
	TMEM47	PLP2
	TSC22D3	PLXNA3
	TSPYL2	PLXNB3
	UBE1	PNMA5
	UBE2A	PNMA6A
	UBQLN2	PORCN
	UPF3B	POU3F4
	USP26	PPP1R3F
	USP51	PQBP1
	UXT	PRRG3
	VBP1	PRY2
	WBP5	PTCHD1
	WDR13	RAB33A
	WDR44	RAI2
	WDR45	RBM3
	WNK3	RBMY1A1
	XK	RENBP
	XKRX	RGAG1
	ZBTB33	RGN
	ZDHHC9	RNF128
	ZNF157	RPA4
	ZNF41	RPL10
	ZNF75	RPS4Y1
		RS1
		SAGE1
		SERPINA7
		SH2D1A
		SLC10A3
		SLC25A5
		SLC6A14
		SLC6A8
		SLC7A3
		SLC9A7
		SLITRK2
		SMARCA1
		SMPX
		SOX3
		SPIN3
		SPRY3
		SRPX2
		SSX3
		SSX6
		STARD8
		SYN1
		SYP
		TAF7L
		TBL1Y
		TBX22
		TCEAL2
		TCEAL3
		TCEAL4
		TCEAL7
		TEX11
		TEX13B
		TFE3
		TIMM17B
		TIMP1
		TKTL1
		TLR8
		TMEM27
		TMEM28
		TMEM31
		TMSB4Y
		TNMD
		TRO
		TRPC5
		TSPY1
		TSPY2
		UBE2NL
		USP11
		VGLL1
		VSIG1
		VSIG4
		WAS
		WDR40B
		XAGE3
		XAGE5
		ZCCHC12
		ZCCHC13
		ZCCHC5
		ZIC3
		ZMAT1
		ZNF185
		ZNF449
		ZNF645
