# Supplementary material for: Genome-Wide Profiling of Histone H3 Lysine 4 and Lysine 27 Trimethylation Reveals an Epigenetic Signature in Prostate Carcinogenesis
Source: PLoS One. 2009 Mar 5;4(3):e4687. doi: 10.1371/journal.pone.0004687 (PMC2650415; doi:10.1371/journal.pone.0004687)
Supplement: Table S8 — Genes with H3K4me3, H3K4K27me3, H3K27me3 and Neither marks in PC3 cells (1.14 MB XLS) [file pone.0004687.s009.xls]

## Sheet: PC3
H3K4me3		H3K4K27me3		H3K27me3		Neither
15E1.2		AASS		7A5		3.8-1
2'-PDE		AATF		A2BP1		A2M
76P		ABCA5		A4GALT		A2ML1
AAAS		ABCA7		AACS		A4GNT
AADACL1		ABCB10		AADAC		AADACL2
AAK1		ABCB7		ABCA1		AADAT
AAMP		ABCB9		ABCA12		AANAT
AARS		ABCC4		ABCA13		AATK
AARSD1		ABCC9		ABCA2		ABCA10
AASDH		ABCD1		ABCA9		ABCA11
AASDHPPT		ABCG2		ABCB5		ABCA3
ABAT		ABHD4		ABCC13		ABCA4
ABCC5		ABHD5		ABCC3		ABCA6
ABCD2		ABHD6		ABCC8		ABCA8
ABCD3		ABI1		ABI3		ABCB1
ABCD4		ABL1		ABLIM3		ABCB11
ABCE1		ABRA		ABO		ABCB4
ABCF1		ACAA1		ACCN2		ABCB6
ABCF2		ACBD6		ACCN3		ABCB8
ABCF3		ACCN1		ACCN4		ABCC1
ABCG1		ACE		ACE2		ABCC10
ABHD10		ACHE		ACRC		ABCC11
ABHD14A		ACO1		ACRV1		ABCC12
ABHD14B		ACOT8		ACSL1		ABCC2
ABHD2		ACOT9		ACSM1		ABCC6
ABHD3		ACOX1		ACSM3		ABCG4
ABHD7		ACP6		ACSS1		ABCG5
ABI2		ACPL2		ACTA1		ABCG8
ABI3BP		ACSL4		ACTL7B		ABHD1
ABLIM1		ACTG1		ACTL8		ABHD11
ABR		ACTL6B		ACTRT2		ABHD12
ABT1		ACTR10		ACY1		ABHD13
ABTB1		ACTR5		ADAM11		ABHD8
ABTB2		ACVR1C		ADAM23		ABHD9
ACAA2		ACVR2B		ADAM28		ABL2
ACACA		ACYP1		ADAM29		ABLIM2
ACAD11		ACYP2		ADAMDEC1		ABP1
ACAD9		ADAM9		ADAMTS12		ACACB
ACADM		ADAMTS1		ADAMTS13		ACAD10
ACADS		ADAMTS15		ADAMTS14		ACAD8
ACADSB		ADAMTS19		ADAMTS16		ACADL
ACADVL		ADAMTS20		ADAMTS17		ACAT2
ACAT1		ADAMTS8		ADAMTS18		ACCN5
ACBD3		ADARB1		ADAMTS2		ACF
ACBD4		ADCK4		ADAMTSL2		ACMSD
ACBD5		ADCY1		ADAMTSL3		ACOT11
ACD		ADCY5		ADARB2		ACOT12
ACIN1		ADCY8		ADCY2		ACOT2
ACLY		ADCYAP1R1		ADCY3		ACOT4
ACN9		ADIPOR2		ADCY4		ACOX2
ACO2		ADNP		ADCY9		ACOXL
ACOT7		ADPRHL2		ADCYAP1		ACP5
ACOX3		ADRA1D		ADIPOQ		ACPP
ACP1		ADRB1		ADORA2A		ACPT
ACP2		ADRB2		ADRA1A		ACR
ACSL3		ADRBK1		ADRA1B		ACRBP
ACSS2		AEBP2		ADRA2B		ACSBG1
ACTA2		AGPAT3		ADRB3		ACSBG2
ACTB		AGPAT6		ADSSL1		ACSL5
ACTN1		AGTR1		AEBP1		ACSL6
ACTN3		AGXT2L1		AFF2		ACSM2
ACTN4		AHCYL1		AFF3		ACTG2
ACTR1A		AHI1		AFM		ACTL6A
ACTR1B		AHR		AFP		ACTL7A
ACTR2		AIG1		AGMAT		ACTN2
ACTR3		AIM1		AGPAT2		ACTR8
ACTR3B		AIP		AGR2		ACTRT1
ACTR6		AKAP11		AGTR2		ACVR1
ACVR1B		AKAP13		AGXT		ACVRL1
ACVR2A		AKAP8		AGXT2		ACY3
ACY1L2		AKR1CL2		AHSA2		AD7C-NTP
ADAL		AKT3		AICDA		ADA
ADAM10		ALCAM		AIM1L		ADAM18
ADAM12		ALDH18A1		AIM2		ADAM2
ADAM15		ALDH1L1		AIRE		ADAM20
ADAM17		ALDH9A1		AJAP1		ADAM21
ADAM19		ALG3		AK5		ADAM30
ADAM22		ALK		AKAP14		ADAM32
ADAMTS3		ALMS1		AKAP3		ADAM33
ADAMTS4		ALOXE3		AKAP4		ADAM6
ADAMTS5		AMBP		AKAP7		ADAM7
ADAMTS7		AMIGO2		AKNA		ADAM8
ADAMTS9		AMOT		AKR1C4		ADAMTS10
ADAMTSL1		AMOTL2		ALAS2		ADAMTS6
ADAR		ANK2		ALB		ADAMTSL4
ADAT1		ANKRD10		ALDH1A1		ADAMTSL5
ADC		ANKRD13D		ALDH1A3		ADCK2
ADCK1		ANKRD25		ALDH3B1		ADCY7
ADCK5		ANKRD26		ALDH5A1		ADH1A
ADCY6		ANKRD29		ALLC		ADH1C
ADD1		ANKRD43		ALOX12		ADH4
ADD2		ANKRD47		ALOX12B		ADH6
ADD3		ANKRD49		ALOX15		ADH7
ADFP		ANXA7		ALOX5		ADI1
ADH5		AOF2		ALPL		ADIPOR1
ADHFE1		AP1B1		ALPP		ADM2
ADK		AP1S1		ALS2CR11		ADMR
ADM		AP1S2		ALS2CR7		ADORA2B
ADORA1		AP2M1		ALX4		ADORA3
ADPGK		AP2S1		AMAC1		ADPRH
ADRBK2		AP3B1		AMBN		ADPRHL1
ADRM1		AP3B2		AMELX		ADRA2A
ADSL		AP3D1		AMH		ADRA2C
ADSS		APBB2		AMICA1		AES
AFF1		APCDD1		AMIGO1		AFAR3
AFF4		APEH		AMMECR1		AFARP1
AFG3L1		APEX2		AMPD1		AFTPH
AFG3L2		API5		AMPH		AGBL4
AFMID		APLN		ANAPC7		AGER
AGA		APOBEC3A		ANGPT1		AGRP
AGBL2		APPBP2		ANGPT4		AGT
AGBL3		APRT		ANGPTL2		AGTRL1
AGGF1		ARAF		ANK1		AHCTF1
AGL		ARC		ANKFN1		AHCY
AGPAT1		ARF3		ANKRD15		AHDC1
AGPAT4		ARFGAP1		ANKRD19		AHRR
AGPAT5		ARFGAP3		ANKRD30A		AIF1
AGPAT7		ARHGAP12		ANKRD38		AIPL1
AGPS		ARHGAP20		ANKRD9		AK3L1
AGTPBP1		ARHGAP21		ANP32C		AKR1B10
AGTRAP		ARHGAP24		ANXA1		AKR1C1
AHNAK		ARHGAP29		ANXA10		AKR1C3
AHSA1		ARHGAP4		ANXA5		AKR1D1
AHSG		ARHGAP6		AOC2		AKR7A2
AK1		ARHGEF1		AOF1		AKR7A3
AK2		ARHGEF10		AP1S3		ALAD
AK3		ARHGEF2		AP3M2		ALDH1A2
AK3L2		ARHGEF9		AP4E1		ALDH1L2
AK7		ARID1A		APBB1IP		ALDH3A1
AKAP1		ARIH1		APBB3		ALDH3B2
AKAP10		ARIH2		APCS		ALDH8A1
AKAP12		ARL15		APOBEC1		ALDOAP2
AKAP5		ARL4D		APOBEC3C		ALDOB
AKAP6		ARL5A		APOC1		ALDOC
AKAP8L		ARL6IP2		APOE		ALF
AKAP9		ARL6IP4		APOL3		ALG10
AKR1A1		ARL6IP6		AQP1		ALG10B
AKR1B1		ARMCX2		AQP11		ALG11
AKT1		ARMCX3		AQP12A		ALG12
AKT1S1		ARMCX4		AQP5		ALKBH1
AKT2		ARMCX5		AR		ALKBH2
ALAS1		ARMCX6		AREG		ALKBH3
ALDH16A1		ARNTL		ARF6		ALKBH4
ALDH1B1		ARRDC4		ARHGAP10		ALKBH5
ALDH2		ARS2		ARHGAP17		ALKBH6
ALDH3A2		ASAH1		ARHGAP18		ALKBH7
ALDH4A1		ASB1		ARHGAP25		ALKBH8
ALDH6A1		ASB11		ARHGAP30		ALOX12P2
ALDH7A1		ASB9		ARHGEF10L		ALOX15B
ALDOA		ASCL1		ARHGEF16		ALOX5AP
ALG1		ASF1B		ARHGEF17		ALPI
ALG14		ASMT		ARID5A		ALPK1
ALG2		ASMTL		ARMC4		ALPK2
ALG5		ASNA1		ARMCX1		ALPK3
ALG6		ASPHD2		ARPP-21		ALPPL2
ALG8		ASTN2		ARRB1		ALS2CL
ALG9		ASXL2		ARRDC1		ALS2CR12
ALS2		ATAD1		ARSA		ALS2CR8
ALS2CR13		ATG12		ARSE		ALX3
ALS2CR2		ATG16L1		ARSF		AMAC1L2
ALS2CR4		ATG16L2		ARSI		AMDHD1
AMACR		ATG3		ARVCF		AMDHD2
AMD1		ATIC		ARX		AMELY
AMFR		ATN1		ASAHL		AMN
AMHR2		ATOH1		ASB10		AMY1C
AMOTL1		ATOH7		ASB12		AMZ1
AMPD2		ATOH8		ASB16		ANAPC11
AMPD3		ATP11B		ASCL2		ANG
AMT		ATP11C		ASGR2		ANGPTL1
AMZ2		ATP12A		ASL		ANGPTL3
ANAPC1		ATP1B1		ASPA		ANGPTL4
ANAPC10		ATP1B3		ASZ1		ANGPTL6
ANAPC13		ATP2A2		ATCAY		ANGPTL7
ANAPC2		ATP2C1		ATF3		ANKAR
ANAPC4		ATP5G2		ATG4A		ANKDD1A
ANAPC5		ATP5G3		ATP10A		ANKIB1
ANGEL1		ATP6AP2		ATP13A4		ANKK1
ANGEL2		ATP6V0B		ATP1A3		ANKMY1
ANGPT2		ATPBD4		ATP1B4		ANKRD1
ANGPTL5		ATR		ATP2A3		ANKRD13A
ANK3		ATRN		ATP2B2		ANKRD16
ANKFY1		ATXN1		ATP2B3		ANKRD18A
ANKH		ATXN7		ATP4A		ANKRD2
ANKHD1		AUTS2		ATP4B		ANKRD20A2
ANKMY2		AVPR1A		ATP6V0D2		ANKRD21
ANKRA2		AVPR1B		ATP6V1B1		ANKRD23
ANKRD11		AXIN2		ATP6V1C2		ANKRD28
ANKRD12		AYTL1		ATP6V1F		ANKRD32
ANKRD13B		B3GALNT2		ATP8A2		ANKRD33
ANKRD13C		B3GALT6		ATPAF1		ANKRD34
ANKRD17		B3GAT2		ATXN7L2		ANKRD35
ANKRD22		B4GALNT3		AVPI1		ANKRD39
ANKRD27		B4GALT1		AVPR2		ANKRD45
ANKRD37		B4GALT5		AXL		ANKRD50
ANKRD40		bA16L21.2.1		B3GALT4		ANKRD53
ANKRD41		BAI2		B3GAT1		ANKRD54
ANKRD42		BAPX1		B3GNT4		ANKRD55
ANKRD44		BARHL2		B4GALNT2		ANKRD57
ANKRD46		BARX1		B4GALT2		ANKRD6
ANKRD5		BASP1		BAAT		ANKRD7
ANLN		BAT2D1		BACE2		ANKS1A
ANP32A		BAZ1A		BAI1		ANKS1B
ANP32B		BAZ1B		BAIAP3		ANKS3
ANP32E		BBS4		BANK1		ANKS4B
ANTXR1		BBS5		BARHL1		ANKS6
ANTXR2		BBX		BARX2		ANKZF1
ANXA2		BCAM		BCAP31		ANP32D
ANXA3		BCAN		BCAR1		ANPEP
ANXA4		BCAT1		BCHE		ANUBL1
ANXA6		BCDIN3		BCL2L10		ANXA11
AOX1		BCL11A		BCL2L11		ANXA13
AP1G1		BCL11B		BCL2L14		ANXA2P1
AP1G2		BCL2L2		BCORL1		ANXA2P3
AP1GBP1		BCL6		BCR		ANXA8
AP1M1		BCL7A		BDKRB1		ANXA9
AP2A1		BCL7B		BGN		AOAH
AP2A2		BCL9L		BHLHB4		AOC3
AP2B1		BCLAF1		BHLHB8		AP1M2
AP3M1		BCOR		BIRC7		AP4M1
AP3S1		BDKRB2		BMP15		APBA2
AP3S2		BDNF		BMP3		APC2
AP4B1		BEX1		BMP4		APCDD1L
AP4S1		BEX2		BMP5		APITD1
APAF1		BHLHB3		BMP7		APOA1
APBA1		BHLHB5		BMP8A		APOA1BP
APBA2BP		BHLHB9		BMX		APOA2
APBA3		BIRC4		BNC2		APOA4
APBB1		BIRC6		BOK		APOA5
APC		BIRC8		BPHL		APOB
APEX1		BMP2		BPIL1		APOB48R
APH1A		BMP6		BPIL3		APOBEC2
APH1B		BMPER		BRD3		APOBEC3B
APIP		BNC1		BRDT		APOBEC3D
APLP1		BOC		BRS3		APOBEC3F
APLP2		BPGM		BRSK2		APOBEC3G
APOLD1		BRD1		BSND		APOC2
APP		BRF2		BTBD12		APOC3
APPBP1		BRP44L		BTBD2		APOC4
APRIN		BRPF3		BTBD9		APOD
APTX		BRUNOL4		BTC		APOF
AQP10		BRWD1		BTK		APOH
AQR		BRWD3		BTNL2		APOL1
ARCN1		BSCL2		BTNL3		APOL2
ARD1A		BSN		BTNL9		APOL4
ARF1		BST2		BZW1		APOL5
ARF4		BTG1		C10orf10		APOL6
ARF5		BTN2A2		C10orf107		APOM
ARFGEF1		BTRC		C10orf116		APR-2
ARFIP1		BUB1		C10orf30		AQP2
ARFIP2		BUB1B		C10orf39		AQP3
ARFRP1		BUB3		C10orf64		AQP4
ARG2		C10orf25		C10orf92		AQP6
ARHGAP1		C10orf46		C11orf35		AQP7
ARHGAP19		C10orf47		C11orf40		AQP7P2
ARHGAP22		C10orf57		C11orf42		AQP8
ARHGAP26		C10orf97		C12orf35		AQP9
ARHGAP5		C11orf37		C12orf40		ARFGEF2
ARHGAP9		C12orf39		C12orf54		ARG1
ARHGDIB		C12orf42		C14orf105		ARHGAP11A
ARHGEF11		C12orf5		C14orf115		ARHGAP15
ARHGEF12		C13orf18		C14orf139		ARHGAP23
ARHGEF19		C13orf21		C14orf155		ARHGAP27
ARHGEF3		C14orf100		C14orf161		ARHGAP28
ARHGEF4		C14orf101		C14orf173		ARHGAP8
ARID1B		C14orf102		C14orf43		ARHGDIA
ARID2		C14orf106		C14orf68		ARHGDIG
ARID3B		C14orf118		C15orf2		ARHGEF15
ARID4A		C14orf162		C15orf38		ARHGEF18
ARID4B		C14orf37		C16orf24		ARHGEF5
ARL1		C14orf4		C16orf28		ARHGEF6
ARL2		C14orf80		C16orf30		ARHGEF7
ARL2BP		C15orf26		C17orf38		ARID3A
ARL3		C15orf27		C18orf26		ARID5B
ARL4C		C15orf29		C19orf21		ARL10
ARL5B		C16orf45		C19orf26		ARL11
ARL6		C18orf1		C1orf100		ARL13B
ARL6IP5		C18orf45		C1orf116		ARL14
ARL8A		C19orf23		C1orf128		ARL16
ARL8B		C19orf24		C1orf135		ARL4A
ARMC1		C1GALT1C1		C1orf150		ARMC3
ARMC2		C1orf114		C1orf172		ARMET
ARMC5		C1orf121		C1orf65		ARPC1B
ARMC6		C1orf145		C1orf69		ARPM1
ARMC7		C1orf156		C1orf90		ARR3
ARMC8		C1orf159		C1QA		ARRDC2
ARMC9		C1orf164		C1QL1		ARSG
ARMETL1		C1orf165		C1QL2		ARSK
ARNT		C1orf181		C1QL3		ART1
ARNT2		C1orf52		C1QTNF5		ART3
ARNTL2		C1orf63		C1R		ART5
ARPC1A		C1orf75		C1S		ARTN
ARPC2		C1orf88		C20orf10		ASAH2
ARPC3		C1orf93		C20orf106		ASAH3
ARPC4		C1QBP		C20orf114		ASB17
ARPC5		C1QTNF4		C20orf151		ASB2
ARPC5L		C20orf103		C20orf166		ASB4
ARPP-19		C20orf111		C20orf185		ASB5
ARRB2		C20orf132		C20orf186		ASCL3
ARRDC3		C20orf24		C20orf195		ASF1A
ARSB		C20orf27		C20orf32		ASIP
ARSD		C20orf42		C20orf39		ASNSD1
ARSJ		C20orf43		C20orf46		ASPN
ART4		C20orf72		C20orf58		ASPSCR1
ARTS-1		C21orf2		C20orf59		ASRGL1
ARV1		C21orf55		C20orf71		ASTL
AS3MT		C21orf69		C20orf79		ATAD3A
ASAM		C21orf7		C21orf129		ATAD3B
ASB13		C21orf88		C21orf29		ATAD3C
ASB14		C2orf30		C21orf56		ATAD4
ASB3		C3orf14		C2orf15		ATF7IP
ASB6		C3orf21		C2orf19		ATF7IP2
ASB7		C3orf23		C3		ATG10
ASB8		C3orf36		C3orf27		ATG4B
ASCC1		C4orf15		C3orf45		ATG9A
ASCC2		C5orf3		C4BPA		ATG9B
ASCC3		C6orf114		C4BPB		ATHL1
ASCC3L1		C6orf141		C4orf7		ATOX1
ASCIZ		C6orf145		C6orf10		ATP10B
ASGR1		C6orf168		C6orf142		ATP10D
ASH1L		C6orf203		C6orf15		ATP11A
ASH2L		C6orf211		C6orf150		ATP13A1
ASNS		C8orf33		C6orf192		ATP13A5
ASPH		C8orf37		C6orf195		ATP1A1
ASPHD1		C8orf40		C6orf27		ATP1A2
ASPM		C9orf123		C6orf64		ATP1A4
ASTE1		C9orf140		C6orf85		ATP2B1
ASXL1		C9orf156		C6orf97		ATP5B
ATAD2		C9orf18		C7orf16		ATP5D
ATBF1		C9orf3		C7orf29		ATP5H
ATE1		C9orf41		C7orf34		ATP6AP1
ATF1		C9orf46		C8orf16		ATP6V0A4
ATF2		C9orf52		C8orf22		ATP6V1E2
ATF4		C9orf68		C8orf31		ATP6V1G2
ATF5		C9orf75		C8orf34		ATP6V1G3
ATF6		C9orf89		C8orf47		ATP8B1
ATF7		C9orf93		C9		ATP8B4
ATG4C		CA10		C9orf102		ATPAF2
ATG4D		CA12		C9orf103		ATXN2
ATG5		CA13		C9orf58		ATXN7L1
ATG7		CA5B		C9orf61		ATXN7L3
ATM		CA8		C9orf66		AURKA
ATP13A2		CAB39		C9orf71		AURKAIP1
ATP1B2		CABC1		C9orf90		AURKC
ATP2A1		CABP1		C9orf94		AVEN
ATP2B4		CACHD1		C9orf95		AVIL
ATP5A1		CACNA1D		CA1		AVP
ATP5C1		CACNA1G		CA2		AXIN1
ATP5E		CACNA2D3		CA3		AYP1p1
ATP5F1		CACNB3		CA4		AYTL2
ATP5G1		CACNB4		CA7		AZGP1
ATP5I		CACNG4		CA9		AZU1
ATP5J		CACNG8		CABP7		B3GALNT1
ATP5J2		CADPS2		CACNA1A		B3GALT1
ATP5L		CALB1		CACNA1B		B3GALT2
ATP5O		CALCA		CACNA1E		B3GALT5
ATP5S		CALCR		CACNA1F		B3GAT3
ATP6V0A1		CALM1		CACNA1H		B3GNT2
ATP6V0A2		CALM3		CACNG2		B3GNT3
ATP6V0C		CAMK1G		CACNG3		B3GNT5
ATP6V0D1		CAMK2B		CACNG6		B3GNT7
ATP6V1A		CAMK2G		CADPS		B3GNT8
ATP6V1B2		CAMKK2		CALB2		B3GNTL1
ATP6V1C1		CAMKV		CALML5		B4GALT4
ATP6V1D		CAMTA1		CALN1		BAALC
ATP6V1E1		CAP1		CAMK2A		BAD
ATP6V1G1		CAPN2		CAMK2N1		BAGE
ATP6V1H		CAPN7		CAMK2N2		BAGE4
ATP7B		CAPNS1		CAPN13		BAHCC1
ATP8A1		CAPZA1		CAPN6		BAIAP2
ATP8B2		CARD8		CAPSL		BAIAP2L1
ATP8B3		CARS		CARD14		BAIAP2L2
ATP9A		CART1		CARD9		BAK1
ATP9B		CASK		CASP14		BAT2
ATPBD1B		CASP2		CASQ1		BATF
ATPBD1C		CAV1		CAV2		BATF2
ATPBD3		CBFB		CBFA2T3		BAZ2A
ATPIF1		CBLN1		CBLC		BAZ2B
ATRNL1		CBLN4		CBX7		BBOX1
ATRX		CBX2		CCDC22		BBS10
ATXN10		CBX4		CCDC3		BBS7
ATXN2L		CBX5		CCDC37		BC038740
ATXN3		CCDC11		CCDC4		BC37295_3
ATXN7L4		CCDC21		CCKAR		BCAR3
AUH		CCDC25		CCKBR		BCAR4
AUP1		CCDC28B		CCL1		BCAS1
AURKB		CCDC45		CCL11		BCAS4
AXUD1		CCDC49		CCL13		BCDO2
AZI1		CCDC63		CCL15		BCL2A1
AZI2		CCDC65		CCL16		BCL6B
AZIN1		CCK		CCL18		BCMO1
B2M		CCL2		CCL20		BCORL2
B3GNT1		CCL27		CCL21		BDH2
B3GNT6		CCM2		CCL23		BET1L
B4GALNT1		CCNA1		CCL28		BET3L
B4GALNT4		CCNC		CCL3		BEXL1
B4GALT3		CCND1		CCL4		BFSP2
B4GALT6		CCNE1		CCL7		BGLAP
B4GALT7		CCRK		CCL8		BHMT
BACE1		CCT2		CCNB3		BIC
BACH1		CCT4		CCND2		BICC1
BACH2		CCT7		CCR1		BIK
BAG1		CCT8		CCR3		BIN2
BAG2		CD151		CCR5		BLK
BAG3		CD276		CD109		BLNK
BAG4		CD59		CD14		BLR1
BAG5		CD81		CD163		BLVRB
BAHD1		CD82		CD163L1		BMI1
BAI3		CD9		CD177		BMP10
BAMBI		CD99		CD180		BMP8B
BANF1		CDAN1		CD1A		BNIP1
BANP		CDC34		CD1B		BOLA1
BAP1		CDC42		CD1C		BOLA2
BARD1		CDC42BPB		CD1D		BOLA2B
BAT1		CDC42EP5		CD1E		BOLL
BAT3		CDCA4		CD22		BP75
BAT4		CDCA7		CD244		BPI
BAT5		CDCA7L		CD300LB		BPIL2
BAX		CDCP1		CD33		BPY2B
BBC3		CDH6		CD34		BRAP
BBS1		CDH8		CD37		BRCC2
BBS2		CDK2		CD3D		BRCC3
BCAP29		CDK2AP1		CD3E		BRDG1
BCAS2		CDK2AP2		CD3G		BRI3BP
BCAS3		CDK5R2		CD40LG		BRSK1
BCAT2		CDKL5		CD48		BRUNOL5
BCCIP		CDKN1A		CD5L		BSDC1
BCKDHA		CDKN2A		CD68		BSPRY
BCKDHB		CDO1		CD69		BST1
BCKDK		CDS1		CD84		BTBD11
BCL10		CDV3		CD86		BTBD16
BCL2		CDY2A		CD8A		BTG4
BCL2L1		CDYL		CD99L2		BTLA
BCL2L12		CEACAM20		CDA		BTN1A1
BCL2L13		CEBPA		CDC42BPG		BTN2A1
BCL3		CEBPB		CDH10		BTN2A3
BCL7C		CEBPG		CDH12		BTNL8
BCL9		CECR6		CDH13		BUD13
BCS1L		CELSR3		CDH15		BUD31
BDH1		CENTA1		CDH16		BZRAP1
BDP1		CENTB2		CDH17		C10orf11
BECN1		CEP250		CDH18		C10orf110
BET1		CEP63		CDH22		C10orf114
BFAR		CEP68		CDH23		C10orf12
BFSP1		CEPT1		CDH3		C10orf122
BHLHB2		CERK		CDH4		C10orf128
BHMT2		CGNL1		CDH9		C10orf130
BICD1		CHAF1A		CDK3		C10orf136
BICD2		CHCHD5		CDKN2B		C10orf27
BID		CHD1		CDR1		C10orf33
BIN1		CHD1L		CDSN		C10orf49
BIN3		CHD4		CDX1		C10orf51
BIRC2		CHD5		CDX2		C10orf54
BIRC3		CHD6		CDX4		C10orf59
BIRC5		CHGA		CDYL2		C10orf62
BIVM		CHGB		CEACAM19		C10orf65
BLCAP		CHL1		CEACAM21		C10orf67
BLM		CHMP1B		CEACAM3		C10orf68
BLMH		CHMP6		CEACAM4		C10orf75
BLOC1S1		CHPF		CEACAM5		C10orf76
BLOC1S2		CHRDL1		CEACAM6		C10orf81
BLVRA		CHRDL2		CEACAM7		C10orf82
BLZF1		CHRM1		CEACAM8		C10orf90
BMF		CHRM2		CEBPE		C10orf91
BMP1		CHRM5		CECR1		C10orf93
BMP2K		CHST1		CEL		C10orf96
BMPR1A		CHST2		CELSR1		C11orf1
BMPR1B		CHTF18		CENTA2		C11orf16
BMPR2		CIITA		CENTB5		C11orf17
BNIP2		CITED1		CENTD1		C11orf21
BNIP3		CITED2		CENTD2		C11orf36
BNIP3L		CKS2		CENTD3		C11orf39
BNIPL		CLK3		CEP135		C11orf41
BOLA3		CLN8		CER1		C11orf44
BOP1		CLSTN3		CES7		C11orf47
BPNT1		CLYBL		CETN1		C11orf51
BRAF		CMTM3		CFTR		C11orf52
BRCA1		CNDP2		CGN		C11orf54
BRCA2		CNIH		CH25H		C11orf56
BRD2		CNIH3		CHAD		C11orf57
BRD4		CNKSR2		CHAF1B		C11orf58
BRD7		CNKSR3		CHAT		C11orf59
BRD8		CNN2		CHCHD4		C11orf60
BRD9		CNN3		CHD9		C11orf61
BRE		CNNM2		CHIT1		C11orf63
BRF1		CNNM3		CHMP2B		C11orf64
BRI3		CNO		CHODL		C11orf65
BRIP1		CNOT6		CHRD		C11orf66
BRMS1		CNOT8		CHRNA4		C11orf67
BRMS1L		CNTN5		CHRNB2		C11orf68
BRP44		CNTNAP2		CHRND		C11orf69
BRPF1		CNTNAP5		CHST12		C11orf70
BRUNOL6		COBL		CHST4		C11orf71
BRWD2		COBLL1		CHST7		C11orf72
BSG		COG1		CHST8		C11orf73
BTAF1		COG2		CHST9		C11orf74
BTBD1		COL11A1		CIB3		C11orf75
BTBD10		COL12A1		CIDEA		C11orf76
BTBD14A		COL13A1		CILP2		C11orf77
BTBD14B		COL21A1		CIRBP		C11orf9
BTBD3		COL2A1		CITED4		C12orf12
BTBD6		COL4A3		CLCA1		C12orf24
BTBD7		COL5A1		CLCA2		C12orf25
BTBD8		COL6A1		CLCA3		C12orf27
BTD		COLEC12		CLCA4		C12orf28
BTF3		COMMD5		CLCN4		C12orf33
BTG2		COMMD7		CLCN5		C12orf36
BTG3		COPB2		CLDN1		C12orf45
BTN3A1		COPS6		CLDN11		C12orf49
BTN3A2		COPS7A		CLDN16		C12orf50
BTN3A3		COQ2		CLDN17		C12orf51
BVES		COQ6		CLDN19		C12orf52
BXDC1		CORO2B		CLDN2		C12orf59
BXDC2		COX17		CLDN4		C12orf60
BXDC5		COX4I1		CLDN5		C12orf61
BYSL		COX5B		CLDN7		C12orf62
BZW2		COX6B2		CLDN8		C12orf63
C10orf104		COX6C		CLEC10A		C13orf16
C10orf111		COX7C		CLEC14A		C13orf26
C10orf118		CPLX1		CLEC1A		C14orf103
C10orf119		CPLX2		CLEC1B		C14orf109
C10orf125		CPNE2		CLEC2B		C14orf113
C10orf137		CPNE4		CLEC3A		C14orf121
C10orf22		CPNE5		CLEC4C		C14orf128
C10orf26		CPNE8		CLEC4D		C14orf131
C10orf28		CPT1C		CLEC4E		C14orf135
C10orf32		CPT2		CLEC4G		C14orf140
C10orf35		CRAMP1L		CLEC4M		C14orf142
C10orf38		CRAT		CLEC5A		C14orf144
C10orf4		CRBN		CLEC7A		C14orf145
C10orf56		CREB5		CLGN		C14orf148
C10orf58		CREBBP		CLIC5		C14orf152
C10orf6		CREG1		CLIC6		C14orf167
C10orf61		CREG2		CLSTN2		C14orf177
C10orf63		CREM		CLU		C14orf178
C10orf72		CRHR1		CLUL1		C14orf179
C10orf78		CRIP1		CMA1		C14orf28
C10orf79		CRIP2		CMTM2		C14orf39
C10orf83		CRSP2		CMTM7		C14orf44
C10orf84		CRTAC1		CMYA1		C14orf45
C10orf88		CRTAP		CNDP1		C14orf48
C10orf95		CRY1		CNGA4		C14orf49
C11orf10		CRYBA2		CNIH2		C14orf50
C11orf2		CRYGC		CNTFR		C14orf54
C11orf24		CSNK1E		CNTN2		C14orf56
C11orf30		CSNK1G3		COIL		C14orf65
C11orf31		CSNK2A2		COL11A2		C14orf72
C11orf45		CSTB		COL14A1		C14orf81
C11orf46		CSTF2		COL16A1		C14orf83
C11orf48		CTBP1		COL18A1		C14orf91
C11orf49		CTBS		COL1A1		C15orf21
C12orf10		CTDP1		COL23A1		C15orf28
C12orf11		CTDSP2		COL24A1		C15orf31
C12orf23		CTGF		COL25A1		C15orf32
C12orf26		CTNNA3		COL27A1		C15orf39
C12orf29		CTNNB1		COL4A4		C15orf41
C12orf30		CTNND1		COL4A5		C15orf42
C12orf31		CTSG		COL4A6		C15orf43
C12orf32		CTSO		COL5A3		C15orf45
C12orf34		CTTN		COL6A2		C15orf48
C12orf38		CTTNBP2NL		COL6A3		C15orf49
C12orf4		CUGBP2		COL8A1		C15orf5
C12orf41		CUTL2		COL8A2		C15orf50
C12orf43		CXADR		COL9A1		C15orf51
C12orf44		CXCL3		COL9A2		C16orf14
C12orf47		CXCL6		COLEC10		C16orf3
C12orf48		CXCR4		COMMD4		C16orf44
C12orf53		CXorf26		COMP		C16orf5
C12orf57		CXorf34		COX7B2		C16orf54
C13orf1		CXorf38		CPA6		C16orf57
C13orf23		CXorf41		CPAMD8		C16orf58
C13orf24		CXorf42		CPM		C16orf59
C13orf3		CXorf43		CPNE7		C16orf61
C13orf7		CXorf48		CPXCR1		C16orf63
C13orf8		CXXC4		CR2		C16orf65
C14orf1		CXXC5		CRB3		C16orf68
C14orf104		CYB561		CREB3L3		C16orf7
C14orf108		CYFIP1		CRH		C16orf70
C14orf112		CYGB		CRHBP		C16orf71
C14orf119		CYHR1		CRHR2		C16orf72
C14orf122		CYP19A1		CRIM1		C16orf73
C14orf124		CYP1A1		CRISP1		C16orf74
C14orf126		CYP20A1		CRISP2		C16orf75
C14orf129		CYP24A1		CRISP3		C17orf46
C14orf130		CYP26A1		CRLF1		C17orf47
C14orf133		CYP26B1		CRMP1		C17orf49
C14orf138		CYP27B1		CRNN		C17orf50
C14orf143		CYP2J2		CRP		C17orf54
C14orf147		CYP2R1		CRX		C17orf55
C14orf149		CYP46A1		CSAG2		C17orf64
C14orf151		CYP7B1		CSDA		C17orf66
C14orf153		D4S234E		CSDC2		C17orf67
C14orf156		DACH1		CSF2RA		C17orf69
C14orf159		DACH2		CSF2RB		C17orf72
C14orf166		DACT1		CSK		C17orf74
C14orf169		DALRD3		CSMD2		C17orf76
C14orf172		DAZAP1		CSMD3		C17orf77
C14orf174		DBC1		CSN1S1		C17orf78
C14orf2		DBH		CSN3		C17orf80
C14orf21		DBI		CSNK1A1L		C17orf81
C14orf24		DBNL		CSNK1G2		C17orf83
C14orf32		DBP		CSPG5		C17orf85
C14orf79		DBX2		CSPP1		C18orf15
C14orf93		DCAKD		CST11		C18orf16
C14orf94		DCBLD2		CST2		C18orf18
C15orf15		DCC		CST5		C18orf2
C15orf17		DCDC1		CST8		C18orf23
C15orf23		DCK		CST9		C18orf50
C15orf24		DCLRE1B		CST9L		C18orf54
C15orf33		DCLRE1C		CSTL1		C18orf57
C15orf37		DCP1B		CT45-1		C18orf58
C15orf40		DDAH1		CTAG2		C19orf16
C15orf44		DDI2		CTAGE1		C19orf19
C16orf33		DDR1		CTNNAL1		C19orf22
C16orf35		DDX26B		CTNND2		C19orf25
C16orf46		DDX39		CTPS2		C19orf30
C16orf48		DDX41		CTSB		C19orf31
C16orf52		DDX42		CTTNBP2		C19orf33
C16orf53		DDX47		CTXN1		C19orf34
C16orf55		DDX49		CUL4B		C19orf36
C17orf28		DDX52		CXCL1		C19orf39
C17orf32		DENND2D		CXCL12		C19orf40
C17orf37		DENR		CXCL13		C19orf41
C17orf39		DEPDC1B		CXCL14		C19orf42
C17orf42		DEXI		CXCL16		C19orf43
C17orf45		DGCR14		CXCL2		C19orf44
C17orf48		DGKA		CXCL5		C19orf46
C17orf53		DGKE		CXCR3		C19orf47
C17orf56		DGKI		CXorf1		C19orf48
C17orf57		DGKQ		CXorf20		C1GALT1
C17orf58		DGKZ		CXorf21		C1orf101
C17orf59		DHH		CXorf22		C1orf103
C17orf61		DHRS3		CXorf23		C1orf105
C17orf62		DHX15		CXorf36		C1orf106
C17orf63		DHX33		CXorf6		C1orf111
C17orf65		DHX34		CXorf9		C1orf119
C17orf68		DIAPH2		CYB5R2		C1orf123
C17orf70		DIDO1		CYC1		C1orf127
C17orf71		DIP2A		CYorf15A		C1orf129
C17orf75		DIRAS2		CYP11A1		C1orf136
C17orf79		DKFZp434K1815		CYP11B1		C1orf14
C18orf10		DKFZP564O0823		CYP2A13		C1orf157
C18orf17		DLC1		CYP2A6		C1orf158
C18orf19		DLG3		CYP2A7		C1orf161
C18orf21		DLK1		CYP2B6		C1orf162
C18orf22		DLL1		CYP2C19		C1orf167
C18orf24		DLL4		CYP2C8		C1orf168
C18orf25		DLX1		CYP2D6		C1orf170
C18orf34		DLX2		CYP2E1		C1orf173
C18orf37		DLX4		CYP2F1		C1orf174
C18orf55		DMC1		CYP2S1		C1orf175
C18orf56		DMD		CYP2U1		C1orf177
C18orf8		DMPK		CYP39A1		C1orf178
C19orf12		DMRT2		CYP3A4		C1orf179
C19orf15		DMTF1		CYP3A43		C1orf186
C19orf18		DMWD		CYP3A5		C1orf187
C19orf2		DNAH11		CYP3A7		C1orf190
C19orf20		DNAH9		CYP4A11		C1orf192
C19orf28		DNAJA2		CYP4B1		C1orf198
C19orf6		DNAJB14		CYP4F11		C1orf2
C1D		DNAJB2		CYP4F2		C1orf201
C1orf102		DNAJB5		CYP4F3		C1orf204
C1orf104		DNAJB9		CYP4F8		C1orf210
C1orf107		DNAJC10		CYP4X1		C1orf34
C1orf108		DNAJC14		CYSLTR1		C1orf49
C1orf109		DNAJC6		CYSLTR2		C1orf50
C1orf110		DNAJC9		CYTL1		C1orf51
C1orf112		DNM3		DAB2		C1orf53
C1orf113		DNMT3B		DAP3		C1orf54
C1orf115		DNMT3L		DARS		C1orf56
C1orf118		DOCK11		DCAL1		C1orf58
C1orf122		DOCK7		DCBLD1		C1orf59
C1orf124		DOK4		DCD		C1orf61
C1orf125		DOM3Z		DCHS2		C1orf62
C1orf131		DPF3		DCX		C1orf64
C1orf142		DPP9		DDI1		C1orf67
C1orf144		DPT		DDX25		C1orf78
C1orf149		DRB1		DDX3Y		C1orf79
C1orf151		DRD1		DDX43		C1orf80
C1orf160		DRD2		DDX51		C1orf87
C1orf163		DSCR3		DDX53		C1orf91
C1orf166		DTL		DDX55		C1orf92
C1orf176		DTNA		DEFA3		C1orf94
C1orf182		DTWD2		DEFA4		C1orf95
C1orf183		DULLARD		DEFA5		C1QB
C1orf19		DUS2L		DEFA6		C1QC
C1orf21		DUS4L		DEFB1		C1QTNF2
C1orf25		DUSP11		DEFB118		C1QTNF9
C1orf26		DUSP22		DEFB123		C2
C1orf27		DUSP4		DEFB125		C20orf102
C1orf31		DUT		DEFB126		C20orf107
C1orf35		E2F5		DEFB127		C20orf119
C1orf38		EAF2		DEFB129		C20orf135
C1orf41		EBP		DENND2C		C20orf142
C1orf43		ECE1		DEPDC2		C20orf144
C1orf55		ECGF1		DERL1		C20orf152
C1orf57		EDD1		DES		C20orf160
C1orf66		EDEM1		DFFB		C20orf165
C1orf71		EDF1		DFNB31		C20orf175
C1orf74		EDG4		DGAT2		C20orf179
C1orf76		EDG8		DGKG		C20orf194
C1orf77		EDIL3		DHX37		C20orf196
C1orf82		EDNRB		DIO3		C20orf197
C1orf83		EEF1D		DKC1		C20orf20
C1orf84		EEF1E1		DKFZp547H025		C20orf28
C1orf85		EFHA1		DKFZp686D0972		C20orf54
C1orf86		EFNA5		DKFZp761B107		C20orf56
C1orf89		EFNB1		DLEU7		C20orf7
C1orf9		EFNB2		DLG5		C20orf74
C1orf96		EFS		DLGAP1		C20orf82
C1QTNF1		EGFL9		DLX3		C20orf85
C1QTNF3		EGLN2		DLX5		C21orf105
C1QTNF6		EGR1		DMBT1		C21orf109
C1QTNF7		EGR2		DMBX1		C21orf116
C1RL		EGR3		DMP1		C21orf117
C20orf108		EI24		DMRT1		C21orf121
C20orf11		EIF2B4		DMRT3		C21orf122
C20orf112		EIF2B5		DMRTA1		C21orf13
C20orf116		EIF2S1		DMRTB1		C21orf15
C20orf117		EIF4E2		DMRTC2		C21orf25
C20orf12		ELAC2		DNAH5		C21orf30
C20orf121		ELAVL2		DNAJC4		C21orf42
C20orf133		ELAVL4		DNAJC5B		C21orf6
C20orf141		ELF4		DNASE1L1		C21orf62
C20orf149		ELL2		DNER		C21orf67
C20orf177		ELMOD1		DNM1		C21orf71
C20orf19		ELMOD2		DOC2A		C21orf74
C20orf23		ELOVL1		DOCK2		C21orf77
C20orf26		ELOVL6		DOCK6		C21orf82
C20orf29		EMILIN2		DOCK8		C21orf84
C20orf3		EMILIN3		DOK5		C21orf87
C20orf30		EML4		DOPEY1		C21orf89
C20orf4		EMX2		DPCR1		C21orf96
C20orf44		EN1		DPP10		C21orf99
C20orf52		EN2		DPP4		C22orf15
C20orf67		ENDOG		DPP6		C22orf16
C20orf75		ENO1		DPPA3		C22orf24
C20orf77		ENTPD6		DPYS		C22orf25
C20orf94		EOMES		DPYSL4		C22orf26
C20orf96		EPB41		DPYSL5		C22orf28
C21orf119		EPB41L2		DRD1IP		C22orf29
C21orf33		EPB41L3		DRD3		C22orf30
C21orf34		EPHA4		DRD5		C22orf31
C21orf45		EPHA5		DRP2		C22orf32
C21orf51		EPHB2		DSC1		C2orf12
C21orf57		EPHB4		DSC2		C2orf13
C21orf58		EPHX2		DSC3		C2orf14
C21orf59		EPN2		DSCAML1		C2orf16
C21orf63		EPN3		DSCR10		C2orf24
C21orf66		EPRS		DSCR1L1		C2orf27
C21orf70		EPS8L1		DSCR8		C2orf3
C21orf91		ERBB3		DSG1		C2orf37
C22orf13		ERBB4		DSG2		C2orf39
C22orf23		ERF		DSG3		C3AR1
C22orf5		ERG		DSG4		C3orf15
C22orf9		ERH		DSP		C3orf16
C2orf18		ERO1LB		DTX1		C3orf20
C2orf21		ERRFI1		DTX2		C3orf22
C2orf25		ESAM		DUOX1		C3orf24
C2orf28		ESCO2		DUOX2		C3orf25
C2orf32		ETF1		DUS3L		C3orf30
C2orf33		ETV5		DUSP2		C3orf34
C2orf34		ETV6		DUSP8		C3orf35
C2orf7		EVA1		DUSP9		C3orf41
C3orf1		EVC		DVL1		C3orf42
C3orf10		EVC2		DYNLT3		C3orf44
C3orf17		EVI1		DYRK4		C3orf46
C3orf18		EVI5L		DYSF		C3orf48
C3orf19		EVX1		EBF3		C3orf49
C3orf26		EXOC1		ECEL1		C3orf50
C3orf28		EXOSC4		ECHDC3		C3orf51
C3orf31		EXOSC6		EDA		C3orf53
C3orf32		EXOSC9		EDG6		C3orf54
C3orf33		EYA4		EDG7		C3orf57
C3orf37		F2R		EDN2		C3orf58
C3orf38		F3		EDN3		C3orf59
C3orf39		FABP3		EEF1A2		C3orf60
C3orf52		FADS1		EFEMP1		C3orf62
C4orf12		FADS2		EFEMP2		C3orf63
C4orf14		FADS6		EFHC2		C3orf64
C4orf16		FAM102A		EFHD1		C4B
C5orf13		FAM102B		EFNA2		C4orf17
C5orf15		FAM103A1		EGF		C4orf18
C5orf16		FAM104A		EGFL6		C4orf19
C5orf5		FAM108A1		EGFL7		C4orf20
C6orf106		FAM109A		EGR4		C4orf22
C6orf107		FAM13C1		EHD2		C4orf23
C6orf108		FAM43B		EHF		C4orf26
C6orf113		FAM46A		EHMT1		C4orf27
C6orf125		FAM46C		ELA2		C4orf28
C6orf129		FAM54A		ELAC1		C4orf6
C6orf134		FAM54B		ELAVL3		C4orf8
C6orf152		FAM65A		ELF5		C5
C6orf157		FAM70A		ELK1		C5AR1
C6orf165		FAM76A		ELN		C5orf14
C6orf166		FAM76B		ELOVL2		C5orf20
C6orf167		FAM81A		ELOVL3		C5orf21
C6orf173		FAM89A		ELSPBP1		C5orf22
C6orf199		FAM98A		EMID2		C5orf23
C6orf204		FAM9A		EMP1		C5orf24
C6orf206		FANK1		EMP2		C5orf25
C6orf47		FARP1		EMR1		C5orf4
C6orf57		FAS		EMR2		C6
C6orf60		FAT		EMR3		C6orf1
C6orf62		FBLN1		EMX1		C6orf103
C6orf65		FBLN5		ENPEP		C6orf105
C6orf66		FBN1		ENPP1		C6orf111
C6orf81		FBXL11		ENPP2		C6orf112
C6orf89		FBXL8		ENPP4		C6orf115
C7		FBXO15		ENPP5		C6orf117
C7orf10		FBXO33		ENTPD3		C6orf118
C7orf24		FBXO38		ENTPD8		C6orf120
C7orf25		FBXO39		EPAS1		C6orf128
C7orf26		FBXO7		EPB41L1		C6orf130
C7orf27		FBXW4		EPB41L4B		C6orf136
C7orf30		FBXW7		EPB49		C6orf146
C7orf31		FCMD		EPHA1		C6orf148
C7orf36		FDX1		EPHA10		C6orf151
C8orf13		FER		EPHA2		C6orf153
C8orf32		FEV		EPHA3		C6orf154
C8orf38		FGF11		EPHA7		C6orf159
C8orf41		FGF2		EPHA8		C6orf162
C8orf48		FGF8		EPHB1		C6orf170
C8orf53		FGFR2		EPHB6		C6orf182
C8orf58		FGFRL1		EPO		C6orf189
C8orf76		FHIT		EPX		C6orf194
C9orf100		FHL1		ERAF		C6orf201
C9orf125		FHOD1		EREG		C6orf208
C9orf128		FHOD3		ERICH1		C6orf21
C9orf142		FIBCD1		ERN2		C6orf218
C9orf150		FIGNL1		ESM1		C6orf25
C9orf21		FKBP2		ESPN		C6orf26
C9orf23		FKBP3		ESR1		C6orf32
C9orf25		FLI1		ESR2		C6orf35
C9orf30		FLJ10081		EXTL1		C6orf48
C9orf32		FLJ10241		EYA2		C6orf49
C9orf40		FLJ10292		F11		C6orf50
C9orf43		FLJ10357		F11R		C6orf51
C9orf47		FLJ11184		F12		C6orf52
C9orf5		FLJ11783		F13A1		C6orf58
C9orf6		FLJ20489		F2		C6orf59
C9orf64		FLJ20628		F2RL1		C6orf61
C9orf7		FLJ21062		F5		C6orf70
C9orf72		FLJ21908		F8		C6orf72
C9orf78		FLJ23588		F9		C7orf11
C9orf80		FLJ32447		FA2H		C7orf13
C9orf82		FLJ36208		FABP1		C7orf20
C9orf85		FLJ37357		FABP7		C7orf23
C9orf91		FLJ38973		FAM109B		C7orf28A
C9orf97		FLJ45803		FAM12A		C7orf28B
C9orf98		FLJ46266		FAM12B		C7orf33
CA11		FLJ90709		FAM19A2		C7orf38
CABLES2		FMNL3		FAM19A3		C8A
CABYR		FMO5		FAM19A4		C8B
CACNA1S		FMR1		FAM19A5		C8G
CACNA2D1		FNBP4		FAM20A		C8orf12
CACNA2D2		FNDC3B		FAM20C		C8orf14
CACNB1		FOS		FAM38A		C8orf15
CACNB2		FOXJ3		FAM38B		C8orf17
CACNG7		FOXL2		FAM3A		C8orf30A
CAD		FOXN4		FAM3B		C8orf39
CALCB		FRAS1		FAM45B		C8orf4
CALCOCO1		FRAT1		FAM46D		C8orf42
CALD1		FRMD3		FAM47A		C8orf44
CALM2		FRMD6		FAM47B		C8orf45
CALR		FRMPD1		FAM50A		C8orf46
CALU		FSCN1		FAM53C		C8orf51
CAMK1		FST		FAM55A		C8orf54
CAMK2D		FSTL4		FAM58A		C8orf55
CAMK4		FUCA2		FAM5B		C8orf57
CAMLG		FUNDC1		FAM62C		C8orf59
CAMSAP1L1		FUNDC2		FAM71A		C8orf6
CAMTA2		FURIN		FAM78A		C8orf60
CAND1		FUT11		FAM79B		C8orf66
CANT1		FUT8		FAM80A		C8orf68
CANX		FUT9		FAM81B		C8orf70
CAP2		FXYD5		FAM84B		C8orf71
CAPN10		FXYD6		FAM98C		C8orf73
CAPS2		FYN		FAM9B		C8orf75
CAPZA2		FYTTD1		FAM9C		C8orf77
CARHSP1		FZD1		FANCL		C8orf79
CARKL		FZD10		FAP		C8orf8
CASC1		FZD7		FATE1		C8ORFK29
CASC2		FZD8		FBN2		C9orf109
CASC3		G0S2		FBN3		C9orf11
CASC4		G3BP2		FBXL21		C9orf114
CASC5		GAA		FBXL6		C9orf116
CASP3		GAB2		FBXO18		C9orf121
CASP6		GABARAPL1		FBXO27		C9orf122
CASP7		GABARAPL2		FBXW5		C9orf126
CASP8AP2		GABRA1		FCAMR		C9orf127
CAST		GABRA5		FCAR		C9orf130
CASZ1		GABRD		FCER1A		C9orf131
CAT		GAD1		FCER2		C9orf135
CATSPER2		GADD45A		FCGR2A		C9orf138
CBARA1		GADD45G		FCGR2B		C9orf139
CBFA2T2		GALC		FCGR3A		C9orf14
CBL		GALE		FCGR3B		C9orf153
CBLB		GALNT10		FCGRT		C9orf16
CBLL1		GALNTL1		FCHSD1		C9orf163
CBLN2		GALNTL4		FCN1		C9orf164
CBR1		GAN		FCRL1		C9orf165
CBR3		GAPDHS		FCRL2		C9orf19
CBR4		GARS		FCRL3		C9orf24
CBS		GATA2		FCRL4		C9orf27
CBX1		GATA3		FCRL5		C9orf31
CBX3		GATA4		FETUB		C9orf33
CBX6		GATAD1		FGA		C9orf37
CBX8		GBX2		FGB		C9orf38
CC2D1B		GCAT		FGD1		C9orf39
CCAR1		Gcom1		FGD5		C9orf4
CCBL1		GDAP2		FGF10		C9orf44
CCDC12		GDF6		FGF12		C9orf45
CCDC13		GDNF		FGF13		C9orf50
CCDC14		GEFT		FGF16		C9orf53
CCDC15		GFPT1		FGF18		C9orf57
CCDC16		GFRA1		FGF20		C9orf62
CCDC28A		GHR		FGF3		C9orf70
CCDC32		GIMAP2		FGF4		C9orf79
CCDC34		GJA1		FGF9		C9orf84
CCDC38		GJA8		FGFR3		C9orf86
CCDC41		GJB7		FGG		C9orf9
CCDC42		GK		FHL2		CA14
CCDC43		GLG1		FIGF		CA5A
CCDC44		GLI1		FIS1		CA6
CCDC47		GLRA1		FJX1		CAB39L
CCDC5		GLRX5		FKBP1B		CABIN1
CCDC50		GLS		FKHL18		CABLES1
CCDC52		GLS2		FKSG83		CABP2
CCDC53		GLTP		FLJ11286		CABP4
CCDC55		GLUL		FLJ16165		CABP5
CCDC57		GLULD1		FLJ16237		CACNA1C
CCDC58		GMCL1		FLJ20186		CACNA1I
CCDC59		GMFB		FLJ21511		CACNA2D4
CCDC6		GMPS		FLJ21963		CACNG1
CCDC62		GNA11		FLJ22655		CACNG5
CCDC66		GNA13		FLJ22662		CACYBP
CCDC9		GNAI3		FLJ23049		CALCOCO2
CCHCR1		GNAL		FLJ25439		CALCRL
CCNA2		GNAO1		FLJ25770		CALML3
CCNB1		GNAS		FLJ25801		CALML4
CCNB1IP1		GNB1		FLJ32252		CALML6
CCNB2		GNB2L1		FLJ32658		CALR3
CCNDBP1		GNG12		FLJ33790		CAMK1D
CCNE2		GNL3L		FLJ34047		CAMKK1
CCNF		GNMT		FLJ35773		CAMP
CCNG2		GNPDA1		FLJ37078		CAMSAP1
CCNH		GOLGB1		FLJ37953		CAPG
CCNI		GOPC		FLJ38377		CAPN1
CCNJ		GPC1		FLJ39502		CAPN11
CCNK		GPC2		FLJ39822		CAPN12
CCNL1		GPKOW		FLJ40142		CAPN14
CCNT1		GPR101		FLJ40235		CAPN3
CCNT2		GPR137B		FLJ42393		CAPN5
CCPG1		GPR160		FLJ90650		CAPN9
CCR8		GPR176		FLRT2		CAPNS2
CCRN4L		GPR3		FLT1		CAPS
CCS		GPR50		FLT3		CAPZA3
CCT5		GPR75		FLT4		CAPZB
CCT6B		GPR83		FLYWCH1		CARD10
CD164		GPRASP2		FMNL1		CARD11
CD200		GPRC5A		FMO1		CARD6
CD248		GPRC5C		FMO2		CASD1
CD274		GPSM3		FMO3		CASKIN1
CD2AP		GRB10		FMR1NB		CASKIN2
CD2BP2		GREM1		FNDC1		CASP1
CD320		GRHPR		FNDC5		CASP10
CD36		GRIA2		FOLH1		CASP12
CD3EAP		GRIA3		FOXA1		CASP4
CD4		GRIA4		FOXA2		CASP5
CD44		GRID2		FOXA3		CASP8
CD47		GRIK3		FOXB1		CASP9
CD58		GRIK5		FOXC2		CASQ2
CD63		GRIN3A		FOXD2		CASR
CD83		GRIPAP1		FOXD3		CATR1
CDADC1		GRK5		FOXE3		CATSPER1
CDC14A		GRM1		FOXF1		CATSPER3
CDC14B		GRM3		FOXF2		CATSPER4
CDC16		GRN		FOXG1B		CAV3
CDC2		GRP		FOXH1		CBWD2
CDC20		GRPEL1		FOXJ1		CBWD3
CDC23		GRSF1		FOXL1		CC2D1A
CDC25A		GSC		FOXP2		CCBE1
CDC25B		GSG1		FOXQ1		CCBP2
CDC25C		GSH1		FPR1		CCDC100
CDC27		GSH2		FPRL1		CCDC101
CDC2L5		GSK3B		FPRL2		CCDC102A
CDC2L6		GSN		FRMD4A		CCDC102B
CDC37		GSPT2		FSCN2		CCDC104
CDC37L1		GTF3C1		FSHB		CCDC105
CDC40		GTPBP4		FSTL3		CCDC106
CDC42BPA		GTPBP8		FTCD		CCDC107
CDC42EP1		GTSE1		FTHL17		CCDC108
CDC42EP2		GULP1		FUT2		CCDC109A
CDC42EP3		H3F3B		FUT7		CCDC109B
CDC42EP4		HABP4		FXYD7		CCDC111
CDC42SE1		HACE1		FYB		CCDC112
CDC45L		HAND1		FZR1		CCDC113
CDC5L		HAND2		G6PD		CCDC114
CDC6		HAO2		GAB3		CCDC115
CDC7		HARS2		GABRA2		CCDC116
CDC73		HAT1		GABRA3		CCDC117
CDCA2		HBEGF		GABRA4		CCDC120
CDCA5		HBP1		GABRA6		CCDC17
CDGAP		HBQ1		GABRB1		CCDC19
CDH1		HCFC2		GABRB2		CCDC23
CDH11		HCK		GABRB3		CCDC24
CDH2		HD		GABRE		CCDC26
CDH24		HDAC11		GABRG1		CCDC27
CDH7		HDAC4		GABRG2		CCDC35
CDIPT		HDAC5		GABRG3		CCDC36
CDK10		HDAC6		GABRQ		CCDC39
CDK4		HDAC8		GABRR2		CCDC40
CDK5		HDDC2		GAD2		CCDC46
CDK5RAP2		HDGF		GAL		CCDC48
CDK5RAP3		HEATR1		GAL3ST2		CCDC51
CDK6		HEBP1		GALNS		CCDC54
CDK7		HEBP2		GALNT12		CCDC56
CDK8		HECA		GALNT5		CCDC60
CDK9		HERC3		GALNT6		CCDC67
CDKAL1		HERC5		GALNT8		CCDC68
CDKL1		HES7		GALP		CCDC69
CDKN1B		HEXIM1		GALR1		CCDC7
CDKN1C		HEY2		GALR2		CCDC70
CDKN2C		HIBCH		GAS2L1		CCDC71
CDKN2D		HIGD1A		GAS7		CCDC72
CDKN3		HIPK1		GATA1		CCDC73
CDON		HIST1H1C		GATA5		CCDC74B
CDR2		HIST1H2BK		GATA6		CCDC75
CDR2L		HIST1H3C		GBA3		CCDC76
CDRT4		HIST1H3E		GBGT1		CCDC77
CDS2		HK2		GC		CCDC78
CEBPD		HLA-E		GCG		CCDC8
CEBPZ		HLA-F		GCHFR		CCDC80
CECR5		HLF		GCM2		CCDC81
CEECAM1		HLX1		GCNT1		CCDC82
CENPA		HMCN1		GCNT3		CCDC83
CENPC1		HMG2L1		GDA		CCDC84
CENPF		HMGA1		GDAP1L1		CCDC85B
CENPH		HMGA2		GDF10		CCDC86
CENPJ		HMGB1		GDF2		CCDC87
CENTB1		HMGB3		GDF3		CCDC88
CENTG2		HMGCLL1		GEM		CCDC89
CEP152		HMGCR		GFAP		CCDC91
CEP27		HMGCS1		GFI1		CCDC92
CEP290		HMGN4		GFRA4		CCDC93
CEP55		HMP19		GGT6		CCDC94
CEP57		HMX2		GHRL		CCDC95
CEP70		HNRPD		GHSR		CCDC96
CEP76		HNRPDL		GIF		CCDC97
CES2		HNRPF		GIMAP1		CCDC98
CETN2		HNRPH1		GIMAP4		CCDC99
CETN3		HNRPM		GIMAP5		CCIN
CFDP1		HNRPU		GIMAP6		CCL17
CFL1		HNT		GIMAP7		CCL19
CFL2		HOMER1		GIMAP8		CCL22
CFLAR		HOOK1		GIP		CCL24
CGGBP1		HOOK2		GIPC1		CCL25
CGI-09		HOP		GIPC2		CCL26
CGRRF1		HOXA1		GIPC3		CCL3L3
CHAC2		HOXA4		GJA3		CCL5
CHCHD1		HOXA5		GJA4		CCND3
CHCHD2		HOXA7		GJA5		CCNG1
CHCHD3		HOXB6		GJB1		CCNJL
CHCHD6		HOXB7		GJB2		CCNL2
CHCHD8		HOXC10		GJB4		CCR10
CHD2		HOXC11		GJB6		CCR2
CHD3		HOXC4		GJE1		CCR4
CHEK1		HOXC9		GLI3		CCR6
CHEK2		HOXD12		GLI4		CCR7
CHERP		HOXD13		GLIS1		CCR9
CHFR		HOXD8		GLP1R		CCRL1
ChGn		HP1BP3		GLP2R		CCRL2
CHIC2		HPGD		GLRA2		CCT3
CHID1		HPRT1		GLRA3		CCT6A
CHKA		HPS3		GLRB		CD160
CHKB		HPSE		GLT1D1		CD19
CHM		HRASLS		GLYAT		CD2
CHML		HRK		GLYCTK		CD200R1
CHMP2A		HS3ST2		GML		CD207
CHMP4A		HS3ST3A1		GMPR		CD209
CHMP4B		HS3ST3B1		GNA14		CD226
CHMP5		HS6ST2		GNA15		CD24
CHN1		HS6ST3		GNAT1		CD247
CHORDC1		HSBP1		GNE		CD28
CHP		HSD11B2		GNG13		CD300A
CHPT1		HSPA6		GNG3		CD300C
CHRNA3		HTATSF1		GNGT2		CD300E
CHRNA5		HTR1B		GOLGA1		CD300LF
CHRNA7		HTR2C		GP2		CD300LG
CHRNB1		HTR7		GPA33		CD302
CHRNB4		HTRA1		GPBP1L1		CD33L3
CHST10		HYDIN		GPC3		CD38
CHST11		HYPK		GPC4		CD40
CHST3		IBRDC3		GPC5		CD46
CHST5		ICAM1		GPHB5		CD5
CHSY1		ICAM3		GPM6A		CD52
CHUK		ID2		GPM6B		CD53
CHURC1		ID3		GPR1		CD55
CIB1		IDH3G		GPR103		CD6
CIB2		IFI30		GPR110		CD7
CIC		IFNA6		GPR111		CD72
CINP		IFRD1		GPR113		CD74
CIP29		IFT172		GPR116		CD79A
CIR		IFT52		GPR119		CD79B
CIRH1A		IFT81		GPR12		CD80
CIT		IGF2R		GPR120		CD8B
CKAP2		IGFBP1		GPR126		CD93
CKAP4		IGFBP3		GPR137		CD96
CKAP5		IGFBP4		GPR143		CD97
CKLF		IGSF10		GPR153		CDC14C
CKS1B		IGSF11		GPR158		CDC20B
CLASP1		IKIP		GPR17		CDC26
CLASP2		IL13RA1		GPR171		CDC2L1
CLCC1		IL15		GPR173		CDC2L2
CLCF1		IL1F6		GPR174		CDC42SE2
CLCN2		IL20RA		GPR21		CDCA3
CLCN3		IL6R		GPR23		CDCA8
CLCN6		ILK		GPR26		CDCP2
CLCN7		IMMP2L		GPR34		CDH19
CLDN12		IMMT		GPR4		CDH20
CLDN14		IMPA2		GPR42		CDH26
CLDN23		INADL		GPR44		CDH5
CLDND1		ING2		GPR45		CDK5R1
CLIC1		INHA		GPR6		CDK5RAP1
CLIC4		INHBB		GPR62		CDKL2
CLK1		INPP1		GPR64		CDKL3
CLK2		INSIG1		GPR68		CDRT1
CLK4		INSM1		GPR78		CDRT15
CLN5		INSM2		GPR82		CDT1
CLN6		INVS		GPR88		CEACAM1
CLNS1A		IQGAP2		GPRC5B		CECR2
CLOCK		IRAK1		GPSM2		CECR4
CLPB		IRF4		GPT2		CELSR2
CLPP		IRS2		GPX4		CEND1
CLPTM1		IRS4		GPX5		CENPB
CLPX		IRX3		GPX6		CENPE
CLSPN		IRX5		GPX7		CENPI
CLSTN1		ISL1		GRAMD2		CENPK
CLTA		ISOC1		GRAP2		CENPL
CLTB		ITCH		GREB1		CENPM
CLTC		ITGA3		GRHL1		CENPN
CLTCL1		ITGA4		GRHL2		CENPO
CLUAP1		ITGA5		GRHL3		CENPP
CMAS		ITGA7		GRID1		CENPQ
CMIP		ITGA9		GRIK1		CENPT
CMPK		ITGAD		GRIN1		CENTG3
CMTM1		ITGAV		GRIN2A		CEP110
CMTM4		ITGB1		GRIN2B		CEP164
CMTM6		ITGB8		GRIN2C		CEP170
CNIH4		ITM2A		GRIN3B		CEP192
CNKSR1		ITPKB		GRK7		CEP350
CNNM4		JARID2		GRM2		CEP72
CNOT1		JMJD2C		GRM4		CEP78
CNOT10		JPH1		GRM8		CES1
CNOT2		JPH3		GRPR		CES4
CNOT3		JRK		GSCL		CESK1
CNOT4		JUN		GSDMDC1		CETP
CNOT7		JUNB		GSTT1		CFB
CNP		KALRN		GTPBP5		CFC1
CNTN6		KBTBD11		GUCY2F		CFD
CNTNAP1		KBTBD6		GYG2		CFH
CNTROB		KBTBD8		GYPA		CFHR1
COASY		KCNA3		GYS2		CFHR2
COBRA1		KCNA5		GZMA		CFHR3
COG3		KCNAB1		GZMB		CFHR4
COG4		KCNC3		GZMH		CFHR5
COG5		KCND2		GZMK		CFI
COG6		KCNF1		GZMM		CFLP1
COG7		KCNH3		H1FX		CFP
COL19A1		KCNH7		HAAO		CG012
COL3A1		KCNIP1		HAL		CG018
COL4A2		KCNIP4		HAMP		CGA
COL4A3BP		KCNJ10		HAP1		CGB
COLEC11		KCNJ6		HAPLN1		CGB1
COMMD1		KCNK1		HAPLN4		CGB2
COMMD10		KCNK13		HAS1		CGREF1
COMMD3		KCNK3		HAS3		CHAC1
COMMD6		KCNK4		HBA1		CHCHD7
COMMD9		KCNK9		HBA2		CHD7
COMTD1		KCNMA1		HBB		CHD8
COPA		KCNMB4		HBD		CHDH
COPE		KCNN2		HBE1		CHI3L1
COPG		KCNQ1		HBG1		CHI3L2
COPG2		KCNQ5		HBM		CHIA
COPS2		KCTD8		HCG3		CHIC1
COPS3		KIAA0174		HCN1		CHMP4C
COPS4		KIAA0182		HCN4		CHMP7
COPS5		KIAA0241		HCP5		CHN2
COPS8		KIAA0265		HCRTR1		CHRAC1
COPZ1		KIAA0409		HCRTR2		CHRM3
COQ10A		KIAA0556		HEMGN		CHRM4
COQ10B		KIAA0922		HEPH		CHRNA1
COQ3		KIAA1166		HES2		CHRNA10
COQ5		KIAA1212		HES4		CHRNA2
COQ7		KIAA1328		HES5		CHRNA6
CORIN		KIAA1344		HES6		CHRNA9
CORO1A		KIAA1446		HEYL		CHRNB3
CORO1B		KIAA1622		HFE2		CHRNE
CORO1C		KIAA1754L		HHIP		CHRNG
CORO2A		KIAA1984		HINT1		CHST13
CORO6		KIDINS220		HLA-B		CHST6
COTL1		KIF1C		HLA-C		CIAPIN1
COX10		KIF20A		HLA-DMB		CIB4
COX11		KIF23		HLA-DOA		CICE
COX15		KIF4A		HLA-DOB		CIDEB
COX4NB		KIFC3		HLA-DPA1		CIDEC
COX5A		KIN		HLA-DPB1		CILP
COX6A1		KIRREL		HLA-DQA1		CISH
COX6B1		KIRREL2		HLA-DQA2		CIZ1
COX7A2L		KIRREL3		HLA-DQB2		CKAP2L
CP110		KIT		HLA-DRB1		CKB
CPA1		KLF10		HLA-G		CKM
CPB2		KLF13		HLXB9		CKMT1B
CPD		KLF6		HMGB4		CKMT2
CPE		KLF7		HNRNPG-T		CLC
CPEB2		KLF9		HOXA10		CLCN1
CPEB4		KLHDC5		HOXA11		CLCNKA
CPNE1		KLHDC7A		HOXA13		CLCNKB
CPNE9		KLHL13		HOXA2		CLDN10
CPOX		KLHL14		HOXA3		CLDN15
CPSF1		KLHL15		HOXA6		CLDN18
CPSF2		KLHL20		HOXA9		CLDN22
CPSF3		KLHL23		HOXB1		CLDN3
CPSF4		KLHL9		HOXB13		CLDN6
CPSF6		KLK15		HOXB2		CLDN9
CPT1A		KPNA5		HOXB3		CLDND2
CPVL		KREMEN2		HOXB4		CLEC11A
CPXM2		KRIT1		HOXB5		CLEC12A
CRABP1		KRT10		HOXB8		CLEC2D
CRABP2		KRT19		HOXB9		CLEC2L
CRADD		KY		HOXC12		CLEC3B
CRB1		LAMA3		HOXC13		CLEC4A
CREB1		LAMA5		HOXC8		CLEC4F
CREB3		LAMB1		HOXD10		CLIC2
CREB3L1		LAMP2		HOXD11		CLIC3
CREB3L2		LAP3		HOXD3		CLINT1
CREB3L4		LAPTM4B		HOXD9		CLMN
CREBL1		LARGE		HPCAL1		CLN3
CREBL2		LARP2		HPD		CLPS
CRELD1		LARP6		HPSE2		CMAH
CRIPT		LASP1		HRASLS5		CMKLR1
CRISPLD1		LASS5		HRBL		CMTM5
CRK		LAYN		HRG		CMTM8
CRKL		LBH		HRH2		CMYA3
CRKRS		LBR		HRH3		CMYA5
CRLF3		LBX1		HS3ST1		CNBD1
CROP		LEF1		HS3ST4		CNBP
CROT		LEMD3		HSD17B2		CNFN
CRSP3		LEPREL1		HSD3B2		CNGA1
CRSP6		LEPROTL1		HSF2BP		CNGA3
CRSP7		LGALS1		HSH2D		CNGB1
CRSP8		LGALS8		HSPA1L		CNGB3
CRSP9		LGR5		HSPB3		CNN1
CRTC1		LHX6		HSPC105		CNNM1
CRTC2		LHX9		HTN1		CNOT6L
CRTC3		LIG3		HTR1A		CNR1
CRY2		LIN9		HTR1F		CNR2
CRYGN		LMBR1		HTR2A		CNTD1
CRYL1		LMBRD2		HTR3C		CNTD2
CRYM		LMCD1		HTR3D		CNTN1
CRYZ		LMLN		HTR4		CNTN3
CRYZL1		LMNB1		HTR5A		CNTN4
CS		LMO3		IAPP		CNTNAP3
CSAD		LMO4		IBRDC1		CNTNAP4
CSAG1		LMOD1		IBSP		COCH
CSDE1		LOC116143		ICAM4		COG8
CSE1L		LOC128977		ICAM5		COL10A1
CSF1		LOC130355		ICOSLG		COL15A1
CSGlcA-T		LOC130940		ID4		COL17A1
CSNK1A1		LOC153328		IDI2		COL1A2
CSNK1D		LOC197322		IDS		COL20A1
CSNK1G1		LOC205251		IER3		COL22A1
CSNK2A1		LOC255374		IFI16		COL4A1
CSNK2B		LOC283514		IFNA14		COL5A2
CSRP2		LOC339344		IFNA2		COL7A1
CSRP2BP		LOC348180		IFNA5		COL9A3
CSTF1		LOC374395		IFNA8		COLQ
CSTF2T		LOC387856		IFNE1		COMMD2
CSTF3		LOC388272		IFT122		COMMD8
CTAGE5		LOC388284		IGBP1		COMT
CTBP2		LOC389458		IGF1		COP1
CTCF		LOC399947		IGF2AS		COPB1
CTDSP1		LOC400120		IGFALS		COPS7B
CTDSPL		LOC400451		IGJ		COPZ2
CTDSPL2		LOC400566		IGSF1		COQ4
CTH		LOC441108		IGSF21		COQ9
CTNNA1		LOC441177		IGSF3		CORO7
CTNNA2		LOC57228		IHPK3		CORT
CTNNBIP1		LOC89944		IL10RA		COX18
CTNNBL1		LOC90826		IL13RA2		COX19
CTNS		LOH11CR2A		IL15RA		COX4I2
CTPS		LOR		IL16		COX7A1
CTSC		LOX		IL17C		COX7A2
CTSD		LPGAT1		IL17RB		COX7B
CTSH		LPHN2		IL17RD		COX8A
CTSL2		LPPR4		IL18R1		CP
CTSS		LRAT		IL18RAP		CPA2
CUEDC2		LRBA		IL19		CPA3
CUGBP1		LRCH2		IL1B		CPA4
CUL1		LRFN2		IL1F10		CPA5
CUL2		LRIG3		IL1F5		CPB1
CUL3		LRP2		IL1F7		CPEB1
CUL5		LRP3		IL1F8		CPEB3
CUL7		LRRC1		IL1F9		CPLX3
CUTC		LRRC27		IL1R1		CPLX4
CUTL1		LRRC3B		IL1R2		CPN1
CWF19L1		LRRC4		IL1RAP		CPN2
CXorf15		LRRC43		IL1RAPL1		CPNE3
CXorf39		LRRC8A		IL1RAPL2		CPNE6
CXorf40B		LRRC8C		IL1RL1		CPO
CXXC1		LRRC8D		IL1RL2		CPS1
CYB5A		LRRFIP2		IL1RN		CPSF3L
CYB5B		LRRN1		IL2		CPT1B
CYB5D1		LRRTM1		IL21		CPZ
CYB5D2		LSM12		IL21R		CR1
CYB5R4		LSM7		IL2RA		CRB2
CYBASC3		LSR		IL2RG		CRELD2
CYBRD1		LSS		IL4I1		CRIPAK
CYCS		LUC7L2		IL6		CRISPLD2
CYFIP2		LUM		IL7R		CRLF2
CYLD		LYL1		IL8		CRLS1
CYP17A1		LYN		IL8RA		CRNKL1
CYP1B1		LYNX1		IL9		CROCC
CYP4V2		LYPD1		IL9R		CRTAM
CYP51A1		LYPD5		ILDR1		CRYAA
CYR61		LYPLA2		IMPG1		CRYAB
D15Wsu75e		LYPLA3		INHBE		CRYBA1
DAAM1		LYSMD2		INSL4		CRYBA4
DAB2IP		LZTFL1		IQCA		CRYBB1
DAD1		LZTS2		IQCF1		CRYBB2
DAG1		MAB21L2		IQCF2		CRYBB3
DAND5		MAD2L1		IRAK2		CRYGA
DAP		MAEA		IRAK3		CRYGB
DAPK1		MAF		IRF5		CRYGD
DAPK3		MAFB		IRF6		CRYGS
DARS2		MAFK		IRF8		CSAG3A
DAXX		MAGEA10		IRS1		CSF1R
DAZAP2		MAGEA12		IRX1		CSF2
DBF4		MAGED1		IRX4		CSF3
DBR1		MAGED2		ITGA11		CSF3R
DBT		MAGEE1		ITGA6		CSH1
DC2		MAGEH1		ITGA8		CSH2
DCC1		MAL		ITGAM		CSHL1
DCI		MALL		ITGAX		CSMD1
DCLRE1A		MAMDC2		ITGB1BP3		CSN2
DCN		MAN1A1		ITGB2		CSPG4
DCP1A		MAN1A2		ITGB4		CSPG4LYP1
DCP2		MAN2C1		ITGB5		CSRP1
DCPS		MANEAL		ITIH2		CSRP3
DCTN1		MAP1A		ITIH3		CST1
DCTN2		MAP1D		ITIH5		CST3
DCTN3		MAP2K1		ITIH5L		CST6
DCTN4		MAP2K3		ITK		CST7
DCTN5		MAP2K7		ITLN1		CSTA
DCTN6		MAP3K13		ITLN2		CTA-126B4.3
DCUN1D1		MAP3K4		ITPKA		CTA-216E10.6
DCUN1D3		MAP3K7		IVD		CTA-246H3.1
DCUN1D4		MAP3K7IP1		IZUMO1		CTAG1A
DCUN1D5		MAP7		JAG2		CTAGE3
DDAH2		MAPK1		KAL1		CTAGE4
DDB1		MAPK12		KBTBD5		CTAGE6
DDB2		MAPK8IP2		KCNA1		CTAGEP
DDC		MAPKBP1		KCNA10		CTB-1048E9.5
DDEF2		MAPT		KCNA2		CTCFL
DDEFL1		MARCH4		KCNA6		CTF1
DDHD1		MARCH8		KCNA7		CTF8
DDHD2		MARCKS		KCNAB2		CTGLF1
DDIT3		MARK1		KCNB1		CTHRC1
DDIT4		MARK2		KCNB2		CTLA4
DDOST		MARVELD3		KCNC2		CTR9
DDR2		MAST2		KCNC4		CTRB1
DDX1		MAT2B		KCND1		CTRB2
DDX10		MATR3		KCND3		CTRC
DDX17		MBIP		KCNE1L		CTRL
DDX18		MBTPS1		KCNG1		CTSE
DDX19B		MBTPS2		KCNG2		CTSF
DDX20		MCC		KCNG3		CTSK
DDX21		MCCC1		KCNH5		CTSW
DDX23		MCOLN1		KCNJ12		CTSZ
DDX27		MDGA1		KCNJ15		CUBN
DDX28		MDM2		KCNJ16		CUEDC1
DDX3X		MDS1		KCNJ3		CUL4A
DDX46		MECP2		KCNJ4		CUTA
DDX5		MED12		KCNJ9		CUZD1
DDX50		MED12L		KCNK10		CWF19L2
DDX56		MED31		KCNK12		CX3CL1
DDX58		MEIS1		KCNK17		CX3CR1
DDX59		MEN1		KCNK2		CX40.1
DDX6		MEST		KCNMB2		CX62
DEAF1		METT10D		KCNMB3		CXCL10
DEDD		METTL5		KCNN1		CXCL11
DEGS1		MFAP4		KCNN3		CXCL9
DEK		MFSD1		KCNQ1DN		CXCR6
DENND1A		MFSD3		KCNQ3		CXorf10
DENND4A		MGAT2		KCNQ4		CXorf24
DEPDC1		MGAT5B		KCNS1		CXorf45
DEPDC5		MGC13017		KCNS2		CXorf52
DERA		MGC19604		KCNS3		CXorf56
DERL2		MGC2408		KCNT1		CXorf57
DFFA		MGC27016		KCNV1		CXorf58
DFNA5		MGC34646		KCTD16		CXorf59
DGCR2		MGC34774		KCTD18		CXYorf2
DGCR6L		MGC39545		KDELR2		CYB561D1
DGCR8		MGC61571		KDR		CYB561D2
DGKD		MGC9712		KEL		CYB5R1
DGKH		MICAL1		KHDRBS2		CYB5R3
DGUOK		MID1IP1		KIAA0495		CYBA
DHCR24		MIF4GD		KIAA0672		CYBB
DHDDS		MITF		KIAA1026		CYLC2
DHDH		MIXL1		KIAA1189		CYorf14
DHFR		MKL1		KIAA1199		CYorf15B
DHFRL1		MKRN3		KIAA1244		CYorf16
DHODH		MLF2		KIAA1529		CYP11B2
DHPS		MLL5		KIAA1727		CYP1A2
DHRS1		MLLT3		KIAA1772		CYP21A2
DHRS7		MLSTD2		KIAA1804		CYP27A1
DHRS7B		MLYCD		KIAA1822		CYP2C18
DHTKD1		MME		KIAA1853		CYP2C9
DHX16		MMP16		KIAA1875		CYP2W1
DHX29		MN1		KIF17		CYP4F12
DHX30		MNS1		KIF19		CYP4Z1
DHX35		MOBK1B		KIF1A		CYP4Z2P
DHX36		MOCOS		KIF25		CYP7A1
DHX38		MON2		KIFC2		CYP8B1
DHX40		MORF4L2		KLC2		CYYR1
DHX57		MOSPD1		KLC3		D2HGDH
DHX8		MOV10		KLF14		DAAM2
DHX9		MPHOSPH10		KLF2		DAB1
DIABLO		MPHOSPH6		KLF4		DACT2
DIAPH1		MPP2		KLF8		DAK
DICER1		MPPED2		KLHL1		DAMS
DIP2B		MPST		KLHL17		DAO
DIP2C		MRC2		KLHL21		DAOA
DIRAS1		MRCL3		KLHL4		DAPK2
DIRAS3		MRM1		KLK1		DAPP1
DIRC2		MRPL1		KLK10		DARC
DISC1		MRPL12		KLK11		DAZ2
DIXDC1		MRPL39		KLK12		DAZL
DKFZP434B0335		MRPL43		KLK13		DBF4B
DKFZP564J0863		MRPL52		KLK14		DBN1
DKFZP564O0523		MRPL55		KLK2		DBNDD1
DKFZP586P0123		MRPS18B		KLK3		DBNDD2
DKFZp666G057		MRPS33		KLK4		DCDC2
DKFZp762E1312		MS4A3		KLK5		DCHS1
DKK1		MSI1		KLK6		DCST1
DKK2		MSL2L1		KLK7		DCST2
DKK3		MSL3L1		KLK8		DCT
DLAT		MSRB3		KLK9		DCTD
DLD		MSX1		KLRC1		DCUN1D2
DLG1		MSX2		KLRC4		DCXR
DLG4		MT1JP		KLRD1		DDEF1
DLG7		MTAP		KLRF1		DDEF1IT1
DLGAP4		MTCP1		KLRK1		DDIT4L
DLL3		MTERF		KMO		DDN
DLST		MTFR1		KNDC1		DDO
DLX6		MTG1		KNG1		DDT
DMAP1		MTHFD2L		KRT1		DDX11
DMN		MTIF3		KRT12		DDX24
DMXL1		MTMR12		KRT18		DDX31
DMXL2		MTPN		KRT20		DDX4
DNAH7		MTR		KRT23		DDX54
DNAI1		MTRR		KRT24		DEADC1
DNAJA1		MTSS1		KRT3		DEC1
DNAJA3		MTUS1		KRT4		DECR1
DNAJA5		MTX1		KRT5		DECR2
DNAJB1		MUTED		KRT6B		DEDD2
DNAJB11		MVD		KRT6C		DEF6
DNAJB12		MX2		KRT6L		DEFA1
DNAJB4		MXD4		KRT9		DEFB103A
DNAJB6		MXRA5		KRTAP10-10		DEFB104A
DNAJC1		MXRA7		KRTAP11-1		DEFB105A
DNAJC12		MYADM		KRTAP13-1		DEFB106A
DNAJC15		MYB		KRTAP13-2		DEFB114
DNAJC16		MYBPC2		KRTAP13-3		DEFB119
DNAJC17		MYCL1		KRTAP15-1		DEFB4
DNAJC19		MYH11		KRTAP17-1		DENND1B
DNAJC3		MYO1B		KRTAP19-1		DENND1C
DNAJC8		MYO1D		KRTAP4-10		DENND2A
DNAL4		MYT1		KRTAP4-2		DENND3
DNM1L		MYT1L		KRTAP4-4		DENND4C
DNM2		NAB1		KRTAP4-5		DEPDC4
DNMT1		NADSYN1		KRTAP8-1		DEPDC6
DNTTIP1		NAGA		KRTAP9-3		DEPDC7
DNTTIP2		NAGS		KRTAP9-4		DERL3
DOCK4		NANP		KRTCAP3		DET1
DOCK5		NAP1L1		L1CAM		DFNB59
DOCK9		NAP1L3		L3MBTL3		DGAT1
DOK6		NAPG		LAD1		DGAT2L3
DONSON		NAV2		LAIR1		DGCR5
DPAGT1		NBN		LAIR2		DGCR6
DPF1		NCDN		LALBA		DGKB
DPF2		NCKIPSD		LAMA2		DHCR7
DPH1		NCOA5		LAMP3		DHRS2
DPH2		NCSTN		LARP5		DHRS4
DPH5		NDP		LAT2		DHRS9
DPM1		NDRG4		LATS2		DHRSX
DPM2		NDUFA1		LCE1A		DHX32
DPM3		NDUFB11		LCE1B		DIAPH3
DPP3		NDUFB2		LCE1C		DIO1
DPP8		NDUFS6		LCE1D		DIO2
DPY19L4		NEBL		LCE1E		DIO3OS
DPYD		NEDD9		LCE1F		DIP
DPYSL2		NEFL		LCE2A		DIRC1
DPYSL3		NEGR1		LCE2B		DISP1
DR1		NELL2		LCE3A		DISP2
DRAP1		NES		LCE3B		dJ222E13.2
DRG1		NEUROD1		LCE3C		DKFZp313A2432
DRG2		NEUROG2		LCE3D		DKFZp313P036
DSCR1L2		NEUROG3		LCE3E		DKFZP434A0131
DSCR2		NFATC1		LCE4A		DKFZP434A062
DSCR9		NFATC4		LCE5A		DKFZP434B061
DST		NFE2L2		LCK		DKFZp434B1231
DSTN		NFIA		LDOC1		DKFZp434F142
DTNB		NFIL3		LEMD1		DKFZp434G179
DTWD1		NFKB1		LEMD2		DKFZP434H168
DTX3		NFKB2		LENG9		DKFZP434I0714
DUSP1		NFKBIL2		LEPR		DKFZp434J1015
DUSP10		NFS1		LGALS12		DKFZP434K028
DUSP12		NFYA		LGALS13		DKFZp434K191
DUSP14		NFYC		LGALS14		DKFZp434L192
DUSP16		NGFRAP1L1		LGI2		DKFZp434O0320
DUSP18		NHN1		LGI3		DKFZP434O047
DUSP19		NHS		LGICZ1		DKFZP434P211
DUSP26		NIT1		LGR6		DKFZp547E087
DUSP5		NKAP		LHFPL1		DKFZp547G183
DUSP6		NKD2		LHFPL3		DKFZp547J222
DUSP7		NKPD1		LHFPL5		DKFZp547K054
DVL2		NKRF		LHX1		DKFZP547L112
DVL3		NKX2-3		LHX2		DKFZP564C152
DYM		NLGN1		LHX3		DKFZP564C196
DYNC1H1		NLGN3		LHX4		DKFZP564J102
DYNC1LI1		NLK		LHX5		DKFZp564N2472
DYNC1LI2		NMNAT2		LILRA1		DKFZp586C0721
DYNLL1		NMU		LILRA2		DKFZP586H2123
DYNLL2		NOL10		LILRA3		DKFZp586I1420
DYNLRB1		NOL3		LILRA4		DKFZP586K1520
DYNLRB2		NOL4		LILRA5		DKFZp667E0512
DYNLT1		NOLA2		LILRB1		DKFZp667F0711
DYRK1A		NOLC1		LILRB2		DKFZp667G2110
DYRK2		NONO		LILRB3		DKFZp667M2411
DYRK3		NOS1AP		LILRB4		DKFZP686A01247
DYX1C1		NOTCH3		LILRB5		DKFZP686E2158
DZIP1		NOVA1		LILRP2		DKFZp686I15217
DZIP1L		NPAS2		LIMD2		DKFZp761E198
E2F1		NPAS3		LIME1		DKFZp761H2121
E2F2		NPL		LIMS2		DKFZP761M1511
E2F3		NPLOC4		LIN7A		DKFZp761P0212
E2F4		NPM1		LIPG		DKFZP779L1068
E2F6		NPNT		LLGL2		DKFZp779M0652
E2F7		NPR1		LMO2		DKFZp779O175
E2F8		NPR3		LMO6		DKFZp781M2440
EAF1		NPTX1		LMX1A		DKK4
EBAG9		NPY1R		LMX1B		DKKL1
EBNA1BP2		NR1D1		LNX1		DLEC1
EBPL		NR1D2		LOC123688		DLEU1
ECH1		NR2E1		LOC126147		DLEU2
ECHDC1		NR2F1		LOC130576		DLG2
ECHS1		NR2F2		LOC130951		DLGAP2
ECT2		NR3C1		LOC136242		DLSTP
EDARADD		NR3C2		LOC146325		DMGDH
EDG1		NR4A2		LOC161247		DMKN
EDG2		NR5A2		LOC198437		DMRTC1
EDNRA		NRG2		LOC201175		DNA2L
EED		NRIP3		LOC203547		DNAH1
EEF1A1		NRN1		LOC284361		DNAH14
EEF1G		NRP2		LOC285382		DNAH17
EEF2		NRXN1		LOC339524		DNAH3
EEF2K		NRXN2		LOC375449		DNAH8
EEFSEC		NRXN3		LOC387601		DNAHL1
EFCBP1		NSBP1		LOC388610		DNAI2
EFHA2		NSD1		LOC388965		DNAJA4
EFHC1		NT5C1A		LOC441046		DNAJB7
EFHD2		NT5C3L		LOC493869		DNAJB8
EFNA1		NT5E		LOC63928		DNAJC11
EFNA3		NTN2L		LOC91431		DNAJC13
EFNB3		NTN4		LONRF3		DNAJC18
EFTUD1		NTRK2		LOXL1		DNAJC5G
EFTUD2		NTSR1		LPIN1		DNAJC7
EGFR		NUBP2		LPL		DNALI1
EGLN1		NUCKS1		LPO		DNASE1
EGLN3		NUDT10		LPP		DNASE1L2
EHBP1		NUDT16		LRFN5		DNASE1L3
EHD1		NUDT18		LRIG1		DNASE2
EHD4		NUFIP2		LRP11		DNASE2B
EHHADH		NUP160		LRP16		DND1
EHMT2		NUP210		LRP5L		DNHD1
EIF1		NUP214		LRRC31		DNHD2
EIF1AX		NUP98		LRRC47		DNMBP
EIF1B		NXN		LRRC50		DNMT3A
EIF2A		NXPH3		LRRC8E		DNPEP
EIF2AK1		NXT2		LRRTM3		DNTT
EIF2AK3		NY-SAR-48		LSM6		DOC2B
EIF2AK4		OBFC2A		LSP1		DOCK1
EIF2B1		OCLN		LTA		DOCK10
EIF2B2		OCRL		LTBP1		DOCK3
EIF2C1		ODF2		LTF		DOHH
EIF2C2		OGDHL		LUZP4		DOK1
EIF2C3		OGG1		LY6H		DOK2
EIF2C4		OGT		LY6K		DOK3
EIF2S2		OLFM1		LY86		DOLPP1
EIF2S3		OLFM2		LY9		DOPEY2
EIF3S1		OLFML2B		LY96		DOT1L
EIF3S10		OLFML3		LYPD2		DP58
EIF3S12		ONECUT2		LYPD4		DPEP1
EIF3S2		OPA3		LYZL4		DPEP2
EIF3S3		OPCML		MADCAM1		DPEP3
EIF3S4		OPHN1		MAEL		DPP7
EIF3S5		OPRK1		MAFA		DPPA2
EIF3S6		OR10A2		MAG		DPPA4
EIF3S6IP		OR2C1		MAGEA1		DPPA5
EIF3S7		OR7D2		MAGEA11		DPY19L1
EIF4A1		OR7G3		MAGEA8		DPY19L1P1
EIF4A2		OR8D1		MAGEB1		DPY19L2
EIF4B		ORAOV1		MAGEB10		DPY19L3
EIF4E		OSBP2		MAGEB18		DQX1
EIF4EBP1		OSBPL10		MAGEB2		DRD4
EIF4EBP2		OSBPL5		MAGEB3		DSCAM
EIF4ENIF1		OSBPL8		MAGEB4		DSCR1
EIF4G1		OSMR		MAGEB6		DSCR4
EIF4G2		OSR1		MAGEC3		DSCR6
EIF5		OSR2		MAGEE2		DSPP
EIF5A		OSTbeta		MAL2		DTNBP1
EIF5A2		OTOP3		MAN2B2		DTX3L
EIF5B		OTUB1		MAOA		DTYMK
ELAVL1		OXA1L		MAOB		DUB3
ELF1		OXCT1		MAP1LC3A		DUOXA2
ELF2		OXR1		MAP6		DUS1L
ELK3		OXSR1		MAP6D1		DUSP13
ELK4		P15RS		MAPK11		DUSP15
ELL		P2RX2		MAPK3		DUSP21
ELL3		P2RXL1		MARCH1		DUSP23
ELMO1		PACSIN3		MARCKSL1		DUSP3
ELOF1		PAF1		MARCO		DUSP5P
ELOVL4		PAFAH1B1		MARK4		DUX2
ELOVL5		PAFAH1B2		MAS1		DUX3
ELP3		PAICS		MAS1L		DUX4
ELP4		PAIP2		MASP1		DXS542
EME1		PAK3		MASP2		DYDC1
EME2		PANK3		MATK		DYDC2
EMG1		PAP2D		MATN3		DYNC1I1
EMILIN1		PAPPA		MBD3L1		DYNC1I2
EML1		PAPSS2		MBNL3		DYNC2H1
EML2		PAQR5		MC2R		DYNC2LI1
ENAH		PARD6B		MC3R		DYRK1B
ENC1		PARK2		MC5R		DZIP3
ENO2		PARP11		MCAM		E4F1
ENO3		PARP4		MCCD1		EARS2
ENOSF1		PAWR		MCF2		EBF2
ENSA		PAX2		MCOLN3		EBI2
ENTPD4		PAX3		MCTP1		EBI3
ENTPD5		PAX6		MCTP2		ECAT8
ENTPD7		PAX7		MDFI		ECD
EP300		PAX9		MDFIC		ECE2
EP400		PAXIP1		MDM4		ECEL1P2
EPB41L4A		PCAF		ME3		ECHDC2
EPB41L5		PCBP1		MEFV		ECM1
EPC1		PCDH1		MEGF11		ECM2
EPC2		PCDH10		MEOX2		ECOP
EPDR1		PCDH21		MEP1A		ECSM2
EPM2AIP1		PCDH7		MET		EDA2R
EPN1		PCDH8		METRN		EDAR
EPOR		PCK2		METRNL		EDC3
EPPB9		PCNP		MFAP5		EDC4
EPS15		PCNX		MFHAS1		EDEM2
EPS8		PCNXL2		MFI2		EDEM3
ERAL1		PCOLCE		MFSD4		EDG3
ERBB2		PCSK6		MGAM		EDG5
ERBB2IP		PCYT1B		MGAT4A		EDN1
ERCC1		PDCD6IP		MGC11257		EEA1
ERCC2		PDE10A		MGC24975		EEF1B2
ERCC3		PDE1A		MGC26647		EFCAB1
ERCC4		PDE3B		MGC26733		EFCAB2
ERCC5		PDE4DIP		MGC27121		EFCAB3
ERCC6		PDE6D		MGC33407		EFCAB4A
ERCC8		PDE8B		MGC34821		EFCAB4B
ERGIC2		PDGFB		MGC35295		EFCBP2
ERGIC3		PDGFC		MGC35308		EFHB
ERMAP		PDGFRA		MGC39715		EFNA4
ERN1		PDGFRB		MGC39900		EGFL11
ERO1L		PDHA1		MGC42090		EGFL8
ERP29		PDIA6		MGC42105		EHD3
ESCO1		PDLIM1		MGLL		EID3
ESPL1		PDRG1		MGST1		EIF1AY
ESRRA		PDZD4		MICA		EIF2AK2
ESRRG		PDZD8		MICAL2		EIF2B3
ETFA		PECI		MICB		EIF3S8
ETFB		PELI3		MID1		EIF3S9
ETFDH		PEMT		MID2		EIF4E3
ETHE1		PER1		MIDN		EIF4G3
ETNK1		PEX5L		MINA		ELA1
ETNK2		PEX7		MIPOL1		ELA2A
ETS1		PFKFB3		MKNK2		ELA2B
ETS2		PGAM1		MLANA		ELA3B
ETV1		PGK2		MLNR		ELF3
ETV3		PGRMC1		MLPH		ELMO2
ETV4		PGS1		MLXIPL		ELMO3
EVPL		PHACTR3		MMD2		ELOVL7
EWSR1		PHC3		MMP1		ELTD1
EXO1		PHF16		MMP10		EMCN
EXOC2		PHF17		MMP12		EMD
EXOC3		PHF20		MMP15		EMID1
EXOC4		PHF21B		MMP20		EML3
EXOC5		PHF8		MMP24		EMP3
EXOC6		PHKA1		MMP26		EMX2OS
EXOC7		PHKA2		MMP27		ENAM
EXOC8		PHLDA3		MMP3		ENDOGL1
EXOSC1		PHLDB1		MMP7		ENG
EXOSC10		PHOX2B		MMP8		ENO1B
EXOSC2		PHTF1		MMP9		ENPP3
EXOSC3		PI3		MOBP		ENPP6
EXOSC5		PIAS3		MOG		ENPP7
EXOSC7		PIGA		MORC4		ENTHD1
EXOSC8		PIGN		MOS		ENTPD1
EXPH5		PIGX		MPFL		ENTPD2
EXT1		PIGY		MPG		ENY2
EXTL2		PIM3		MPO		EP400NL
EXTL3		PINX1		MPP1		EPB42
EYA1		PIP5KL1		MPP3		EPHA6
EYA3		PITPNM3		MPP7		EPHB3
EZH2		PITX1		MRPS2		EPHX1
FABP5		PITX3		MRPS5		EPM2A
FADD		PIWIL2		MRVI1		EPPK1
FADS3		PJA1		MS4A1		EPR1
FAF1		PJA2		MS4A12		EPS15L1
FAH		PKN2		MS4A2		EPS15L2
FAHD1		PKNOX1		MS4A4A		EPS8L2
FAHD2A		PKP1		MS4A5		EPS8L3
FAIM2		PKP4		MS4A6A		EPSTI1
FAM100A		PLA2G12A		MS4A7		ERAS
FAM100B		PLA2G1B		MS4A8B		ERGIC1
FAM105A		PLA2G6		MSC		ERVWE1
FAM107A		PLAC2		MSLN		ESD
FAM13A1		PLAG1		MSN		ESRRB
FAM14A		PLCXD3		MSR1		ESTRRA
FAM20B		PLEC1		MT1M		ESX1
FAM29A		PLEKHA1		MTAC2D1		ETV7
FAM32A		PLEKHA8		MTERFD3		EVI2A
FAM35A		PLEKHG5		MTFMT		EVI2B
FAM36A		PLK4		MTHFD2		EVI5
FAM40B		PLS3		MTM1		EVL
FAM44A		PLXDC1		MTMR8		EXDL1
FAM44B		PLXDC2		MTNR1A		EXDL2
FAM48A		PLXNA1		MUC7		EXOD1
FAM53B		PLXNA2		MUM1L1		EXT2
FAM55C		PLXNB1		MX1		EZH1
FAM57A		PMM1		MXD1		F10
FAM57B		PMP22		MYBPC1		F13B
FAM59A		PMPCA		MYBPC3		F2RL2
FAM5C		PNMA1		MYCN		F2RL3
FAM60A		PNPLA2		MYCT1		F7
FAM62A		PNPLA4		MYEOV		F8A1
FAM63B		PNPO		MYF5		FAAH
FAM64A		PNPT1		MYF6		FABP2
FAM69B		PODXL		MYH1		FABP4
FAM70B		POGZ		MYH13		FABP6
FAM73A		POLD2		MYH14		FAIM
FAM73B		POLE3		MYH2		FAIM3
FAM79A		POLR1B		MYH4		FAM101A
FAM82B		POLR2F		MYH6		FAM101B
FAM82C		POLR2G		MYH8		FAM104B
FAM83A		POP4		MYL1		FAM105B
FAM84A		POU3F2		MYL5		FAM106A
FAM89B		POU3F3		MYO10		FAM107B
FAM91A1		POU4F1		MYO1F		FAM111A
FAM96A		POU4F2		MYO3A		FAM111B
FAM96B		POU6F1		MYOCD		FAM112A
FANCA		PPAP2B		MYOD1		FAM112B
FANCB		PPAPDC1A		MYOZ2		FAM113A
FANCC		PPARGC1A		N4BP3		FAM113B
FANCD2		PPAT		NAALADL1		FAM116A
FANCE		PPFIBP2		NADK		FAM116B
FANCF		PPIF		NANOG		FAM117A
FANCG		PPIL5		NAP1L2		FAM118A
FANCM		PPP1CB		NAPRT1		FAM118B
FARS2		PPP1R10		NARFL		FAM119A
FASTK		PPP1R15B		NAV3		FAM119B
FAU		PPP1R3B		NBPF11		FAM120A
FBL		PPP2R1B		NCKAP1L		FAM120AOS
FBLIM1		PPP2R2B		NCR1		FAM120B
FBXL10		PPP2R3A		NDN		FAM120C
FBXL13		PPP2R3B		NDRG1		FAM122A
FBXL14		PPP2R5A		NDST4		FAM122B
FBXL15		PPP2R5B		NDUFA10		FAM122C
FBXL17		PPP4R1		NDUFS7		FAM123A
FBXL18		PRAC		NEFH		FAM123B
FBXL20		PRDM12		NEIL2		FAM13A1OS
FBXL3		PRDM13		NEK7		FAM14B
FBXL4		PRDX4		NELL1		FAM18B
FBXL5		PREX1		NETO1		FAM18B2
FBXL7		PRIM2A		NEURL		FAM19A1
FBXO11		PRKAA2		NEUROD2		FAM21C
FBXO16		PRKAB2		NEUROD4		FAM24A
FBXO17		PRKCA		NEUROD6		FAM24B
FBXO21		PRKCG		NEUROG1		FAM26B
FBXO22		PRKCQ		NFATC2		FAM26C
FBXO28		PRKD1		NFE2L3		FAM27L
FBXO3		PRKD2		NGB		FAM33A
FBXO30		PRKG1		NGFB		FAM3C
FBXO34		PRKRA		NGFRAP1		FAM3D
FBXO36		PRKX		NICN1		FAM40A
FBXO4		PRKY		NKIRAS1		FAM41C
FBXO42		PRLHR		NKX2-2		FAM43A
FBXO5		PRMT7		NKX2-5		FAM44C
FBXO6		PRNP		NKX2-8		FAM45A
FBXO8		PROC		NKX3-1		FAM46B
FBXO9		ProSAPiP1		NKX6-1		FAM47C
FBXW11		PRPF39		NKX6-2		FAM49A
FBXW2		PRPH		NLGN4X		FAM49B
FBXW9		PRPS1		NLGN4Y		FAM50B
FCHSD2		PRPS2		NMBR		FAM55B
FDFT1		PRPSAP1		NMNAT3		FAM55D
FDPS		PRR3		NNAT		FAM62B
FDXR		PRR5		NOC2L		FAM63A
FECH		PRR6		NODAL		FAM71B
FEM1B		PRRG1		NOG		FAM71C
FEM1C		PRRX2		NOS1		FAM72A
FEN1		PRSS12		NOTCH4		FAM74A4
FER1L3		PRSS23		NOV		FAM77C
FGD4		PSAT1		NOX1		FAM77D
FGD6		PSCD1		NOXO1		FAM80B
FGF14		PSEN1		NPAS1		FAM82A
FGF5		PSMA3		NPAS4		FAM83B
FGFR1		PSMB2		NPHS2		FAM83C
FGFR1OP		PSMD1		NPPB		FAM83D
FGFR1OP2		PSMD10		NPPC		FAM83E
FGL1		PSMD2		NPTX2		FAM83F
FH		PSME4		NPTXR		FAM83H
FHL3		PTEN		NPY5R		FAM86A
FIBP		PTF1A		NR0B1		FAM86B1
FIGN		PTGDS		NR1H4		FAM86C
FILIP1		PTK2		NR4A1		FAM8A1
FIP1L1		PTMA		NR5A1		FAM90A1
FKBP10		PTN		NRBP2		FAM91A2
FKBP14		PTP4A1		NRG1		FAM92A1
FKBP1A		PTPLA		NRIP1		FAM92A3
FKBP4		PTPLAD1		NSMAF		FAM92B
FKBP5		PTPN12		NTF3		FARP2
FKBP7		PTPN13		NTF5		FASLG
FKBP9		PTPN3		NTN1		FASN
FKBPL		PTPRB		NTNG2		FASTKD1
FKRP		PTPRJ		NTRK3		FASTKD2
FKSG24		PTPRK		NTS		FASTKD3
FKSG44		PTPRM		NUAK1		FASTKD5
FLAD1		PTPRN		NUDT6		FAT2
FLCN		PTPRN2		NXF3		FAT4
FLII		PTPRT		NXF5		FBF1
FLJ10154		PTRF		NXPH4		FBLN2
FLJ10324		PTTG1IP		NYD-SP21		FBP1
FLJ10769		PUNC		NYX		FBP2
FLJ10781		PURA		OBP2B		FBXL12
FLJ10986		PVRL2		OBSCN		FBXL16
FLJ11151		PVRL3		ODZ1		FBXL2
FLJ11171		PYCRL		OFCC1		FBXL22
FLJ11506		PYDC1		OLFM3		FBXO2
FLJ12529		QDPR		OLIG1		FBXO24
FLJ12716		QPCTL		OLIG2		FBXO25
FLJ12949		RAB11FIP5		OLIG3		FBXO31
FLJ13197		RAB1A		OLR1		FBXO32
FLJ13236		RAB26		ONECUT1		FBXO40
FLJ13611		RAB30		OPLAH		FBXO41
FLJ14154		RAB35		OPN1LW		FBXO44
FLJ14803		RAB37		OPRS1		FBXO46
FLJ20254		RAB39B		OR10A4		FBXW10
FLJ20294		RAB40B		OR10A5		FBXW8
FLJ20309		RAB40C		OR10H1		FCER1G
FLJ20699		RAB43		OR10H3		FCGBP
FLJ20920		RAB9A		OR10J1		FCHO1
FLJ21075		RAB9B		OR10J5		FCHO2
FLJ21986		RAD54L		OR10P1		FCN2
FLJ22028		RAE1		OR10R2		FCN3
FLJ22374		RAI14		OR10T2		FEM1A
FLJ23577		RALA		OR11G2		FER1L4
FLJ23861		RALB		OR12D2		FERD3L
FLJ25416		RALBP1		OR12D3		FES
FLJ30277		RALGPS1		OR13C4		FEZ1
FLJ30934		RANBP3		OR13D1		FEZ2
FLJ31438		RAP1B		OR1A1		FFAR1
FLJ31818		RAP2B		OR1A2		FFAR2
FLJ32312		RAP2C		OR1C1		FGD2
FLJ32549		RAPGEF4		OR1D2		FGD3
FLJ35220		RARA		OR1E1		FGF1
FLJ35409		RASA2		OR1F1		FGF17
FLJ36031		RASA3		OR1G1		FGF19
FLJ36070		RASD1		OR1L3		FGF21
FLJ38984		RASGEF1A		OR1L4		FGF22
FLJ39378		RASGEF1C		OR1N2		FGF23
FLJ39653		RASGRF1		OR1Q1		FGF6
FLJ39779		RASGRF2		OR1S2		FGF7
FLJ40288		RASGRP2		OR2A14		FGFBP1
FLJ40298		RASSF5		OR2B2		FGFR4
FLJ40869		RASSF7		OR2B6		FGL2
FLJ45187		RB1CC1		OR2C3		FGR
FLJ45717		RBBP7		OR2F1		FHAD1
FLNA		RBM10		OR2H1		FHL5
FLNB		RBM17		OR2H2		FKBP11
FLNC		RBM24		OR2J2		FKBP6
FLOT1		RBM35A		OR2L13		FKBP8
FLOT2		RBM5		OR2M2		FKBP9L
FLRT3		RBMS1		OR2S2		FKSG2
FMNL2		RBMY1B		OR2T8		FKSG30
FMO4		RBP4		OR2V2		FKSG43
FN1		RBPMS		OR2W1		FLG
FN3K		RBX1		OR2W3		FLJ00049
FN3KRP		RCBTB2		OR3A1		FLJ10038
FNBP1L		RCHY1		OR3A2		FLJ10120
FNDC3A		RCL1		OR3A3		FLJ10213
FNDC8		RCN1		OR4C3		FLJ10232
FNTA		RCN2		OR4D2		FLJ10490
FNTB		RDBP		OR4D5		FLJ10815
FOSB		RDH10		OR4K1		FLJ10916
FOXC1		RELN		OR4K17		FLJ11235
FOXJ2		REPS1		OR4N4		FLJ11236
FOXK2		RERE		OR4X2		FLJ11292
FOXM1		RFC1		OR51B2		FLJ11710
FOXP1		RFC2		OR51B4		FLJ11827
FOXP4		RFT1		OR51B5		FLJ11850
FPGS		RFWD2		OR51D1		FLJ11903
FRAG1		RGL1		OR51E1		FLJ11996
FRAP1		RGL2		OR51E2		FLJ12078
FRAT2		RGS17		OR51G1		FLJ12151
FREQ		RGS20		OR52A1		FLJ12331
FRMD5		RGS9BP		OR52K2		FLJ12355
FRS2		RHAG		OR56B1		FLJ12547
FRS3		RHOB		OR5A1		FLJ12616
FRY		RHOBTB1		OR5AP2		FLJ12825
FRZB		RHOBTB2		OR5F1		FLJ12986
FSIP1		RHOBTB3		OR5I1		FLJ12993
FSTL1		RHOF		OR5P2		FLJ13195
FTH1		RIC8A		OR5P3		FLJ13224
FTL		RICTOR		OR5T2		FLJ13231
FTSJ1		RIF1		OR5V1		FLJ13305
FTSJ3		RIMS3		OR6A2		FLJ13310
FUBP1		RING1		OR6K2		FLJ13744
FUCA1		RIPK3		OR6M1		FLJ13769
FUK		RIPK4		OR6N1		FLJ14082
FUS		RIPK5		OR6Y1		FLJ14100
FUT10		RKHD3		OR7A10		FLJ14107
FVT1		RNASE4		OR7A17		FLJ14126
FXC1		RND1		OR7A5		FLJ14213
FXN		RND3		OR7C2		FLJ14327
FXR1		RNF103		OR7D4		FLJ14397
FXR2		RNF11		OR8B8		FLJ14668
FYCO1		RNF113A		OR8D2		FLJ14712
FZD2		RNF12		OR8H1		FLJ14816
FZD5		RNF13		OR8J1		FLJ14959
FZD6		RNF138		OR8K3		FLJ16478
G6PC3		RNF139		OR8U1		FLJ20021
GAB1		RNF144		ORMDL2		FLJ20035
GABARAP		RNF146		OSCAR		FLJ20054
GABBR1		RNF150		OSM		FLJ20105
GABPA		RNF152		OSTF1		FLJ20160
GABPB2		RNF180		OTEX		FLJ20184
GADD45B		RNF185		OTOP1		FLJ20273
GADD45GIP1		RNF20		OTOP2		FLJ20323
GAK		RNF24		OTOR		FLJ20366
GAL3ST3		RNF26		OTP		FLJ20433
GAL3ST4		RNF32		OTUD6A		FLJ20464
GALK2		RNF38		OTX1		FLJ20581
GALM		RNF43		OTX2		FLJ20712
GALNACT-2		RNF6		OVGP1		FLJ21272
GALNT1		RNF8		OVOL1		FLJ21369
GALNT11		ROCK1		OVOL2		FLJ21408
GALNT14		ROPN1L		OXER1		FLJ21438
GALNT2		ROR2		P2RX5		FLJ21767
GALNT4		RORA		P2RY1		FLJ21865
GALNT7		RORC		P2RY10		FLJ22184
GALR3		RP2		P2RY4		FLJ22222
GALT		RPA3		P2RY8		FLJ22536
GANAB		RPIB9		P4HA2		FLJ22596
GAP43		RPL13A		PABPC3		FLJ22639
GAPDH		RPL24		PABPC5		FLJ22659
GARNL3		RPL3		PADI1		FLJ22675
GART		RPL39		PADI2		FLJ22763
GAS2		RPL7		PAGE1		FLJ22795
GAS2L3		RPL7L1		PAGE4		FLJ22814
GAS6		RPLP0		PAGE5		FLJ23152
GAS8		RPP25		PALLD		FLJ23356
GATM		RPRM		PALM2		FLJ23556
GBA2		RPRML		PALM2-AKAP2		FLJ23569
GBAS		RPS14		PAN3		FLJ23834
GBF1		RPS19		PANX3		FLJ23865
GBL		RPS24		PAPLN		FLJ23867
GBP2		RPS27		PARD3		FLJ25006
GBP3		RPS27L		PARP10		FLJ25037
GBP5		RPS4X		PARP8		FLJ25076
GCA		RPS6		PARVA		FLJ25328
GCC1		RPS6KA2		PARVB		FLJ25371
GCC2		RPS6KA3		PASD1		FLJ25404
GCDH		RPUSD1		PATE		FLJ25476
GCH1		RRAD		PAX1		FLJ25680
GCLC		RRAGB		PAX4		FLJ25778
GCLM		RREB1		PAX5		FLJ25791
GCN1L1		RSHL3		PAX8		FLJ26850
GCNT2		RSPO1		PBOV1		FLJ30064
GCS1		RSPO3		PCBD1		FLJ30092
GDAP1		RTKN		PCBD2		FLJ30313
GDF11		RTN3		PCDH11Y		FLJ30428
GDI2		RTN4		PCDH15		FLJ30430
GDPD1		RUNX1T1		PCDHA11		FLJ30672
[truncated: 4,354 more rows]
