# Supplementary material for: Genome-Wide Profiling of Histone H3 Lysine 4 and Lysine 27 Trimethylation Reveals an Epigenetic Signature in Prostate Carcinogenesis
Source: PLoS One. 2009 Mar 5;4(3):e4687. doi: 10.1371/journal.pone.0004687 (PMC2650415; doi:10.1371/journal.pone.0004687)
Supplement: Table S10 — Differentially expressed genes in EP156T and PC3 cells (0.74 MB XLS) [file pone.0004687.s011.xls]

## Sheet: Up in EP156T
Probe Name	Gene Symbol	Accession number	Description	p-value	Fold Change
A_23_P76249	KRT6B	NM_005555	Homo sapiens keratin 6B (KRT6B), mRNA [NM_005555]	1.55171e-10	1306.78
A_23_P1691	MMP1	NM_002421	Homo sapiens matrix metallopeptidase 1 (interstitial collagenase) (MMP1), mRNA [NM_002421]	1.93329e-10	1017.7
A_23_P79518	IL1B	NM_000576	Homo sapiens interleukin 1, beta (IL1B), mRNA [NM_000576]	2.82987e-10	1015.52
A_23_P96158	KRT17	NM_000422	Homo sapiens keratin 17 (KRT17), mRNA [NM_000422]	1.68699e-08	992.107
A_23_P259071	AREG	NM_001657	Homo sapiens amphiregulin (schwannoma-derived growth factor) (AREG), mRNA [NM_001657]	1.26442e-18	990.754
A_23_P124619	S100A14	NM_020672	Homo sapiens S100 calcium binding protein A14 (S100A14), mRNA [NM_020672]	1.23733e-08	948.754
A_23_P218047	KRT5	NM_000424	Homo sapiens keratin 5 (epidermolysis bullosa simplex, Dowling-Meara/Kobner/Weber-Cockayne types) (KRT5), mRNA [NM_000424]	7.45475e-08	799.664
A_32_P157945	DSP	NM_004415	Homo sapiens desmoplakin (DSP), transcript variant 1, mRNA [NM_004415]	5.16347e-08	747.614
A_32_P105549	ANXA8	NM_001630	Homo sapiens annexin A8 (ANXA8), mRNA [NM_001630]	1.51806e-08	741.505
A_23_P208788	C19orf33	NM_033520	Homo sapiens chromosome 19 open reading frame 33 (C19orf33), mRNA [NM_033520]	2.0705e-10	731.671
A_23_P204947	GJB2	NM_004004	Homo sapiens gap junction protein, beta 2, 26kDa (connexin 26) (GJB2), mRNA [NM_004004]	8.28905e-08	722.31
A_23_P206359	CDH1	NM_004360	Homo sapiens cadherin 1, type 1, E-cadherin (epithelial) (CDH1), mRNA [NM_004360]	9.49568e-10	676.77
A_23_P27795	SPINT2	NM_021102	Homo sapiens serine peptidase inhibitor, Kunitz type, 2 (SPINT2), mRNA [NM_021102]	5.75558e-14	628.189
A_23_P159406	SPRR1B	NM_003125	Homo sapiens small proline-rich protein 1B (cornifin) (SPRR1B), mRNA [NM_003125]	2.70712e-09	620.604
A_23_P170233	CSTA	NM_005213	Homo sapiens cystatin A (stefin A) (CSTA), mRNA [NM_005213]	6.2756e-11	565.613
A_23_P214950	PERP	NM_022121	Homo sapiens PERP, TP53 apoptosis effector (PERP), mRNA [NM_022121]	1.58403e-08	543.096
A_23_P58266	S100P	NM_005980	Homo sapiens S100 calcium binding protein P (S100P), mRNA [NM_005980]	1.42796e-06	527.824
A_23_P353035	IGFBP7	NM_001553	Homo sapiens insulin-like growth factor binding protein 7 (IGFBP7), mRNA [NM_001553]	4.25888e-13	516.119
A_23_P327380	TP73L	NM_003722	Homo sapiens tumor protein p73-like (TP73L), mRNA [NM_003722]	3.54379e-11	495.589
A_23_P415510	LAD1	NM_005558	Homo sapiens ladinin 1 (LAD1), mRNA [NM_005558]	1.16781e-10	490.041
A_23_P324384	RPS4Y2	NM_001039567	Homo sapiens ribosomal protein S4, Y-linked 2 (RPS4Y2), mRNA [NM_001039567]	3.46335e-13	476.045
A_23_P259314	RPS4Y1	NM_001008	Homo sapiens ribosomal protein S4, Y-linked 1 (RPS4Y1), mRNA [NM_001008]	6.75048e-13	469.523
A_23_P41344	EREG	NM_001432	Homo sapiens epiregulin (EREG), mRNA [NM_001432]	3.10502e-09	433.75
A_23_P87653	KRT6C	NM_058242	Homo sapiens keratin 6C (KRT6C), mRNA [NM_058242]	4.69632e-06	390.664
A_23_P207850	TNS4	NM_032865	Homo sapiens tensin 4 (TNS4), mRNA [NM_032865]	1.54894e-06	387.03
A_23_P55632	SERPINB3	NM_006919	Homo sapiens serpin peptidase inhibitor, clade B (ovalbumin), member 3 (SERPINB3), mRNA [NM_006919]	8.91477e-07	386.064
A_23_P502413	SERPINB4	NM_002974	Homo sapiens serpin peptidase inhibitor, clade B (ovalbumin), member 4 (SERPINB4), mRNA [NM_002974]	2.55392e-06	332.423
A_23_P31143	TPD52L1	NM_001003395	Homo sapiens tumor protein D52-like 1 (TPD52L1), transcript variant 2, mRNA [NM_001003395]	9.81843e-08	324.813
A_23_P201636	LAMC2	NM_018891	Homo sapiens laminin, gamma 2 (LAMC2), transcript variant 2, mRNA [NM_018891]	1.81583e-07	316.212
A_23_P86012	LAMB3	NM_001017402	Homo sapiens laminin, beta 3 (LAMB3), transcript variant 2, mRNA [NM_001017402]	3.62396e-09	292.096
A_23_P121716	ANXA3	NM_005139	Homo sapiens annexin A3 (ANXA3), mRNA [NM_005139]	1.14411e-07	282.54
A_23_P164284	CLDN7	NM_001307	Homo sapiens claudin 7 (CLDN7), mRNA [NM_001307]	7.14205e-08	278.494
A_23_P72096	IL1A	NM_000575	Homo sapiens interleukin 1, alpha (IL1A), mRNA [NM_000575]	1.09404e-07	275.572
A_23_P113793	ZBED2	NM_024508	Homo sapiens zinc finger, BED-type containing 2 (ZBED2), mRNA [NM_024508]	2.58366e-06	274.565
A_23_P94501	ANXA1	NM_000700	Homo sapiens annexin A1 (ANXA1), mRNA [NM_000700]	1.4085e-12	272.309
A_23_P134454	CAV1	NM_001753	Homo sapiens caveolin 1, caveolae protein, 22kDa (CAV1), mRNA [NM_001753]	9.22967e-08	271.758
A_23_P66798	KRT19	NM_002276	Homo sapiens keratin 19 (KRT19), mRNA [NM_002276]	9.44246e-12	265.917
A_32_P62963	MGC102966	BC110641	Homo sapiens similar to Keratin, type I cytoskeletal 16 (Cytokeratin-16) (CK-16) (Keratin-16) (K16), mRNA (cDNA clone MGC:102966 IMAGE:4752428), complete cds. [BC110641]	4.53893e-06	265.451
A_23_P161439	C10orf116	NM_006829	Homo sapiens chromosome 10 open reading frame 116 (C10orf116), mRNA [NM_006829]	2.77087e-07	264.759
A_23_P320261	DMKN	NM_033317	Homo sapiens dermokine (DMKN), transcript variant 2, mRNA [NM_033317]	1.9574e-12	263.029
A_23_P49155	CDH3	NM_001793	Homo sapiens cadherin 3, type 1, P-cadherin (placental) (CDH3), mRNA [NM_001793]	2.18354e-09	262.887
A_23_P27133	KRT15	NM_002275	Homo sapiens keratin 15 (KRT15), mRNA [NM_002275]	9.92457e-07	250.027
A_23_P359245	MET	NM_000245	Homo sapiens met proto-oncogene (hepatocyte growth factor receptor) (MET), mRNA [NM_000245]	6.24362e-11	248.612
A_23_P42257	IER3	NM_003897	Homo sapiens immediate early response 3 (IER3), transcript variant short, mRNA [NM_003897]	8.26369e-08	247.512
A_23_P501007	EFEMP1	NM_004105	Homo sapiens EGF-containing fibulin-like extracellular matrix protein 1 (EFEMP1), transcript variant 1, mRNA [NM_004105]	4.6471e-07	242.878
A_23_P381945	KRT7	NM_005556	Homo sapiens keratin 7 (KRT7), mRNA [NM_005556]	4.74569e-10	240.457
A_24_P270728	NUPR1	NM_012385	Homo sapiens nuclear protein 1 (NUPR1), transcript variant 2, mRNA [NM_012385]	4.7476e-06	240.07
A_24_P293192	FXYD3	NM_005971	Homo sapiens FXYD domain containing ion transport regulator 3 (FXYD3), transcript variant 1, mRNA [NM_005971]	1.30694e-08	237.27
A_23_P208126	SERPINB5	NM_002639	Homo sapiens serpin peptidase inhibitor, clade B (ovalbumin), member 5 (SERPINB5), mRNA [NM_002639]	3.57206e-11	232.024
A_23_P28434	VAMP8	NM_003761	Homo sapiens vesicle-associated membrane protein 8 (endobrevin) (VAMP8), mRNA [NM_003761]	3.47081e-08	230.964
A_23_P61149	INPP5D	NM_001017915	Homo sapiens inositol polyphosphate-5-phosphatase, 145kDa (INPP5D), transcript variant 1, mRNA [NM_001017915]	1.62406e-07	223.341
A_23_P4335	KRT14	NM_000526	Homo sapiens keratin 14 (epidermolysis bullosa simplex, Dowling-Meara, Koebner) (KRT14), mRNA [NM_000526]	1.3202e-06	223.029
A_23_P152876	RAB34	NM_031934	Homo sapiens RAB34, member RAS oncogene family (RAB34), mRNA [NM_031934]	7.42799e-09	198.702
A_23_P60130	MAL2	NM_052886	Homo sapiens mal, T-cell differentiation protein 2 (MAL2), mRNA [NM_052886]	4.29088e-06	194.773
A_23_P369343	KLK8	NM_144505	Homo sapiens kallikrein 8 (neuropsin/ovasin) (KLK8), transcript variant 2, mRNA [NM_144505]	1.54795e-05	193.936
A_23_P66355	ITGB4	NM_000213	Homo sapiens integrin, beta 4 (ITGB4), transcript variant 1, mRNA [NM_000213]	5.0276e-09	190.907
A_23_P78265	KRT33A	NM_004138	Homo sapiens keratin, hair, acidic, 3A (KRTHA3A), mRNA [NM_004138]	1.08332e-09	185.304
A_23_P501010	COL17A1	NM_000494	Homo sapiens collagen, type XVII, alpha 1 (COL17A1), transcript variant long, mRNA [NM_000494]	1.54091e-05	178.899
A_23_P169437	LCN2	NM_005564	Homo sapiens lipocalin 2 (oncogene 24p3) (LCN2), mRNA [NM_005564]	3.36382e-06	175.936
A_23_P86682	FER1L3	NM_013451	Homo sapiens fer-1-like 3, myoferlin (C. elegans) (FER1L3), transcript variant 1, mRNA [NM_013451]	8.92706e-13	175.441
A_23_P95810	PKP3	NM_007183	Homo sapiens plakophilin 3 (PKP3), mRNA [NM_007183]	9.33267e-12	168.461
A_23_P434809	S100A8	NM_002964	Homo sapiens S100 calcium binding protein A8 (calgranulin A) (S100A8), mRNA [NM_002964]	5.69935e-06	168.238
A_23_P3221	SQRDL	NM_021199	Homo sapiens sulfide quinone reductase-like (yeast) (SQRDL), mRNA [NM_021199]	5.41651e-09	168.066
A_23_P211007	NRIP1	NM_003489	Homo sapiens nuclear receptor interacting protein 1 (NRIP1), mRNA [NM_003489]	1.87067e-11	165.61
A_23_P47879	STAT6	NM_003153	Homo sapiens signal transducer and activator of transcription 6, interleukin-4 induced (STAT6), mRNA [NM_003153]	6.2083e-10	154.99
A_23_P153120	DSG3	NM_001944	Homo sapiens desmoglein 3 (pemphigus vulgaris antigen) (DSG3), mRNA [NM_001944]	1.56409e-06	146.868
A_24_P335092	SAA1	NM_000331	Homo sapiens serum amyloid A1 (SAA1), transcript variant 1, mRNA [NM_000331]	0.00281357	146.198
A_24_P278747	CCND2	NM_001759	Homo sapiens cyclin D2 (CCND2), mRNA [NM_001759]	9.37678e-09	144.838
A_23_P17663	MX1	NM_002462	Homo sapiens myxovirus (influenza virus) resistance 1, interferon-inducible protein p78 (mouse) (MX1), mRNA [NM_002462]	0.000809044	142.585
A_23_P47282	ST14	NM_021978	Homo sapiens suppression of tumorigenicity 14 (colon carcinoma) (ST14), mRNA [NM_021978]	3.80631e-10	138.053
A_23_P31407	AGR2	NM_006408	Homo sapiens anterior gradient 2 homolog (Xenopus laevis) (AGR2), mRNA [NM_006408]	2.69291e-05	131.251
A_23_P63254	SFN	NM_006142	Homo sapiens stratifin (SFN), mRNA [NM_006142]	4.25802e-07	130.711
A_23_P206280	GPR56	NM_201525	Homo sapiens G protein-coupled receptor 56 (GPR56), transcript variant 3, mRNA [NM_201525]	1.6575e-06	128.229
A_23_P421175	FAM83H	NM_198488	Homo sapiens family with sequence similarity 83, member H (FAM83H), mRNA [NM_198488]	1.11837e-12	128.191
A_23_P64129	HTATIP2	AF092095	Homo sapiens alternatively spliced product of metastasis-suppressor gene CC3 (TC3) mRNA, complete cds. [AF092095]	2.28707e-09	127.572
A_23_P165636	CAPG	NM_001747	Homo sapiens capping protein (actin filament), gelsolin-like (CAPG), mRNA [NM_001747]	5.55135e-08	127.455
A_23_P160167	TSPAN1	NM_005727	Homo sapiens tetraspanin 1 (TSPAN1), mRNA [NM_005727]	7.82366e-08	126.758
A_23_P118065	HSD17B2	NM_002153	Homo sapiens hydroxysteroid (17-beta) dehydrogenase 2 (HSD17B2), mRNA [NM_002153]	1.28912e-08	125.321
A_23_P59388	DST	AF165191	Homo sapiens BPAG1n3 (BPAG1) mRNA, partial cds. [AF165191]	4.85571e-07	124.705
A_23_P101407	C3	NM_000064	Homo sapiens complement component 3 (C3), mRNA [NM_000064]	0.000368444	122.82
A_24_P379233	GJB3	AF052692	Homo sapiens connexin 31 (GJB3) mRNA, complete cds. [AF052692]	1.66085e-10	121.846
A_23_P78980	B3GNT3	NM_014256	Homo sapiens UDP-GlcNAc:betaGal beta-1,3-N-acetylglucosaminyltransferase 3 (B3GNT3), mRNA [NM_014256]	6.51916e-07	120.774
A_23_P373708	FLJ40504	NM_173624	Homo sapiens hypothetical protein FLJ40504 (FLJ40504), mRNA [NM_173624]	1.56443e-10	118.329
A_23_P200203	ECHDC2	NM_018281	Homo sapiens enoyl Coenzyme A hydratase domain containing 2 (ECHDC2), mRNA [NM_018281]	1.77747e-09	117.954
A_24_P190472	SLPI	NM_003064	Homo sapiens secretory leukocyte peptidase inhibitor (SLPI), mRNA [NM_003064]	1.98606e-05	114.804
A_23_P115022	TMEM125	NM_144626	Homo sapiens transmembrane protein 125 (TMEM125), mRNA [NM_144626]	1.483e-06	112.754
A_23_P201706	S100A2	NM_005978	Homo sapiens S100 calcium binding protein A2 (S100A2), mRNA [NM_005978]	5.05784e-16	111.019
A_32_P151544	KRT18	L32537	Homo sapiens (clone XP6G6B) mRNA, partial EST. [L32537]	7.81392e-10	109.703
A_23_P24870	CD44	NM_000610	Homo sapiens CD44 molecule (Indian blood group) (CD44), transcript variant 1, mRNA [NM_000610]	2.80223e-07	103.971
A_23_P202978	CASP1	NM_033292	Homo sapiens caspase 1, apoptosis-related cysteine peptidase (interleukin 1, beta, convertase) (CASP1), transcript variant alpha, mRNA [NM_033292]	1.65489e-09	103.075
A_23_P390068	C19orf21	NM_173481	Homo sapiens chromosome 19 open reading frame 21 (C19orf21), mRNA [NM_173481]	3.29289e-06	101.239
A_23_P121657	HS3ST1	NM_005114	Homo sapiens heparan sulfate (glucosamine) 3-O-sulfotransferase 1 (HS3ST1), mRNA [NM_005114]	2.95983e-09	100.97
A_23_P153480	KLK5	NM_012427	Homo sapiens kallikrein 5 (KLK5), mRNA [NM_012427]	7.15923e-05	100.487
A_23_P91081	TACSTD1	NM_002354	Homo sapiens tumor-associated calcium signal transducer 1 (TACSTD1), mRNA [NM_002354]	5.522e-08	96.6999
A_23_P72737	IFITM1	NM_003641	Homo sapiens interferon induced transmembrane protein 1 (9-27) (IFITM1), mRNA [NM_003641]	0.00527481	91.1656
A_23_P110531	FST	NM_013409	Homo sapiens follistatin (FST), transcript variant FST344, mRNA [NM_013409]	9.8636e-05	90.1401
A_23_P160025	IFI16	NM_005531	Homo sapiens interferon, gamma-inducible protein 16 (IFI16), mRNA [NM_005531]	2.74441e-08	88.2926
A_23_P215566	AHR	NM_001621	Homo sapiens aryl hydrocarbon receptor (AHR), mRNA [NM_001621]	2.35264e-06	88.0044
A_23_P210763	JAG1	NM_000214	Homo sapiens jagged 1 (Alagille syndrome) (JAG1), mRNA [NM_000214]	3.79392e-06	85.2988
A_23_P30126	FGFBP1	NM_005130	Homo sapiens fibroblast growth factor binding protein 1 (FGFBP1), mRNA [NM_005130]	4.8003e-05	83.6116
A_24_P14584	BACE2	NM_012105	Homo sapiens beta-site APP-cleaving enzyme 2 (BACE2), transcript variant a, mRNA [NM_012105]	2.25552e-11	82.6533
A_32_P85999	CDH13	NM_001257	Homo sapiens cadherin 13, H-cadherin (heart) (CDH13), mRNA [NM_001257]	1.43041e-07	82.5428
A_23_P156327	TGFBI	NM_000358	Homo sapiens transforming growth factor, beta-induced, 68kDa (TGFBI), mRNA [NM_000358]	3.22532e-06	81.1704
A_23_P2271	PTHLH	NM_198965	Homo sapiens parathyroid hormone-like hormone (PTHLH), transcript variant 1, mRNA [NM_198965]	1.35308e-05	81.0558
A_23_P36658	MGST1	NM_145791	Homo sapiens microsomal glutathione S-transferase 1 (MGST1), transcript variant 1c, mRNA [NM_145791]	8.80009e-10	80.8882
A_23_P151506	PLEK2	NM_016445	Homo sapiens pleckstrin 2 (PLEK2), mRNA [NM_016445]	1.18035e-05	77.5113
A_23_P343963	FAM83F	NM_138435	Homo sapiens family with sequence similarity 83, member F (FAM83F), mRNA [NM_138435]	2.36354e-05	76.4378
A_24_P114249	GALNT3	NM_004482	Homo sapiens UDP-N-acetyl-alpha-D-galactosamine:polypeptide N-acetylgalactosaminyltransferase 3 (GalNAc-T3) (GALNT3), mRNA [NM_004482]	6.34446e-10	76.0905
A_23_P74609	G0S2	NM_015714	Homo sapiens G0/G1switch 2 (G0S2), mRNA [NM_015714]	2.14998e-08	75.9431
A_23_P154605	SULF2	NM_018837	Homo sapiens sulfatase 2 (SULF2), transcript variant 1, mRNA [NM_018837]	5.86146e-06	75.3529
A_23_P167096	VEGFC	NM_005429	Homo sapiens vascular endothelial growth factor C (VEGFC), mRNA [NM_005429]	4.95631e-06	74.9957
A_23_P29551	TMEM40	NM_018306	Homo sapiens transmembrane protein 40 (TMEM40), mRNA [NM_018306]	2.86718e-06	74.3595
A_23_P24104	PLAU	NM_002658	Homo sapiens plasminogen activator, urokinase (PLAU), mRNA [NM_002658]	1.35816e-06	74.3012
A_23_P4714	MIA	NM_006533	Homo sapiens melanoma inhibitory activity (MIA), mRNA [NM_006533]	3.62636e-09	73.397
A_23_P109143	PRNP	NM_000311	Homo sapiens prion protein (p27-30) (Creutzfeldt-Jakob disease, Gerstmann-Strausler-Scheinker syndrome, fatal familial insomnia) (PRNP), transcript variant 1, mRNA [NM_000311]	1.65407e-07	73.3583
A_23_P218770	RAC2	NM_002872	Homo sapiens ras-related C3 botulinum toxin substrate 2 (rho family, small GTP binding protein Rac2) (RAC2), mRNA [NM_002872]	3.3727e-07	72.8976
A_23_P7144	CXCL1	NM_001511	Homo sapiens chemokine (C-X-C motif) ligand 1 (melanoma growth stimulating activity, alpha) (CXCL1), mRNA [NM_001511]	0.00706178	72.5916
A_23_P39265	LYPD3	NM_014400	Homo sapiens LY6/PLAUR domain containing 3 (LYPD3), mRNA [NM_014400]	1.12549e-06	71.4623
A_23_P38537	KRT16	NM_005557	Homo sapiens keratin 16 (focal non-epidermolytic palmoplantar keratoderma) (KRT16), mRNA [NM_005557]	3.31573e-06	71.2586
A_23_P500998	HOXA9	NM_152739	Homo sapiens homeobox A9 (HOXA9), mRNA [NM_152739]	6.61406e-08	71.1112
A_23_P14083	AMIGO2	NM_181847	Homo sapiens adhesion molecule with Ig-like domain 2 (AMIGO2), mRNA [NM_181847]	5.41596e-07	70.3767
A_23_P500421	EYA2	NM_172113	Homo sapiens eyes absent homolog 2 (Drosophila) (EYA2), transcript variant 2, mRNA [NM_172113]	2.58617e-08	69.8133
A_23_P22134	BNC1	NM_001717	Homo sapiens basonuclin 1 (BNC1), mRNA [NM_001717]	3.36892e-12	68.7382
A_23_P67529	KCNN4	NM_002250	Homo sapiens potassium intermediate/small conductance calcium-activated channel, subfamily N, member 4 (KCNN4), mRNA [NM_002250]	6.41692e-05	67.5985
A_23_P500130	ANKRD15	NM_153186	Homo sapiens ankyrin repeat domain 15 (ANKRD15), transcript variant 2, mRNA [NM_153186]	7.15855e-07	67.2112
A_23_P2920	SERPINA3	NM_001085	Homo sapiens serpin peptidase inhibitor, clade A (alpha-1 antiproteinase, antitrypsin), member 3 (SERPINA3), mRNA [NM_001085]	0.000247376	66.7788
A_23_P121120	GPR87	NM_023915	Homo sapiens G protein-coupled receptor 87 (GPR87), mRNA [NM_023915]	4.19787e-08	66.2296
A_23_P393051	C1orf172	NM_152365	Homo sapiens chromosome 1 open reading frame 172 (C1orf172), mRNA [NM_152365]	8.30308e-09	64.7227
A_23_P57784	CLDN1	NM_021101	Homo sapiens claudin 1 (CLDN1), mRNA [NM_021101]	4.84975e-05	64.4737
A_23_P397248	CLCA2	NM_006536	Homo sapiens chloride channel, calcium activated, family member 2 (CLCA2), mRNA [NM_006536]	1.69395e-09	64.4188
A_23_P134113	C6orf192	NM_052831	Homo sapiens chromosome 6 open reading frame 192 (C6orf192), mRNA [NM_052831]	4.5743e-09	64.3943
A_23_P154358	PROM2	NM_144707	Homo sapiens prominin 2 (PROM2), mRNA [NM_144707]	5.74593e-06	64.0001
A_32_P231617	TM4SF1	NM_014220	Homo sapiens transmembrane 4 L six family member 1 (TM4SF1), mRNA [NM_014220]	3.31256e-05	63.5565
A_23_P214168	COL12A1	NM_004370	Homo sapiens collagen, type XII, alpha 1 (COL12A1), transcript variant long, mRNA [NM_004370]	6.56657e-10	63.5318
A_23_P49499	ST6GALNAC2	NM_006456	Homo sapiens ST6 (alpha-N-acetyl-neuraminyl-2,3-beta-galactosyl-1,3)-N-acetylgalactosaminide alpha-2,6-sialyltransferase 2 (ST6GALNAC2), mRNA [NM_006456]	1.92848e-08	63.3883
A_23_P26629	PYCARD	NM_013258	Homo sapiens PYD and CARD domain containing (PYCARD), transcript variant 1, mRNA [NM_013258]	1.02074e-08	63.3501
A_23_P70785	AIM1	NM_001624	Homo sapiens absent in melanoma 1 (AIM1), mRNA [NM_001624]	2.70622e-12	62.2825
A_23_P145024	ADRB2	NM_000024	Homo sapiens adrenergic, beta-2-, receptor, surface (ADRB2), mRNA [NM_000024]	2.92695e-07	61.5799
A_23_P255444	DAPP1	NM_014395	Homo sapiens dual adaptor of phosphotyrosine and 3-phosphoinositides (DAPP1), mRNA [NM_014395]	1.11464e-08	61.5284
A_23_P24843	MICAL2	NM_014632	Homo sapiens microtubule associated monoxygenase, calponin and LIM domain containing 2 (MICAL2), mRNA [NM_014632]	2.37641e-08	61.4839
A_24_P406132	MAPK13	NM_002754	Homo sapiens mitogen-activated protein kinase 13 (MAPK13), mRNA [NM_002754]	5.92826e-07	60.8744
A_23_P58396	PDGFC	NM_016205	Homo sapiens platelet derived growth factor C (PDGFC), mRNA [NM_016205]	2.87216e-06	59.1977
A_24_P245379	SERPINB2	NM_002575	Homo sapiens serpin peptidase inhibitor, clade B (ovalbumin), member 2 (SERPINB2), mRNA [NM_002575]	2.62141e-06	59.0866
A_23_P1682	TMEM45B	NM_138788	Homo sapiens transmembrane protein 45B (TMEM45B), mRNA [NM_138788]	2.29943e-05	58.5901
A_23_P897	C1orf116	NM_023938	Homo sapiens chromosome 1 open reading frame 116 (C1orf116), mRNA [NM_023938]	8.87419e-06	58.3832
A_23_P41645	ELL2	NM_012081	Homo sapiens elongation factor, RNA polymerase II, 2 (ELL2), mRNA [NM_012081]	2.14908e-08	57.9634
A_24_P625382	CSDA	NM_003651	Homo sapiens cold shock domain protein A (CSDA), mRNA [NM_003651]	4.16757e-07	57.7663
A_23_P115091	RAB25	NM_020387	Homo sapiens RAB25, member RAS oncogene family (RAB25), mRNA [NM_020387]	1.12785e-09	57.7399
A_23_P55251	ITGA3	NM_002204	Homo sapiens integrin, alpha 3 (antigen CD49C, alpha 3 subunit of VLA-3 receptor) (ITGA3), transcript variant a, mRNA [NM_002204]	3.66741e-08	57.5005
A_23_P35293	GJB5	NM_005268	Homo sapiens gap junction protein, beta 5 (connexin 31.1) (GJB5), mRNA [NM_005268]	2.05139e-10	57.3707
A_23_P500000	SCEL	NM_144777	Homo sapiens sciellin (SCEL), transcript variant 2, mRNA [NM_144777]	7.23291e-06	57.3396
A_23_P360316	FUT3	NM_000149	Homo sapiens fucosyltransferase 3 (galactoside 3(4)-L-fucosyltransferase, Lewis blood group) (FUT3), mRNA [NM_000149]	1.03031e-05	56.8077
A_23_P74012	SPRR1A	NM_005987	Homo sapiens small proline-rich protein 1A (SPRR1A), mRNA [NM_005987]	8.82151e-05	56.3408
A_23_P147918	S100A16	NM_080388	Homo sapiens S100 calcium binding protein A16 (S100A16), mRNA [NM_080388]	5.65655e-13	55.5022
A_24_P331128	GNA15	NM_002068	Homo sapiens guanine nucleotide binding protein (G protein), alpha 15 (Gq class) (GNA15), mRNA [NM_002068]	2.47525e-10	55.4129
A_23_P819	ISG15	NM_005101	Homo sapiens ISG15 ubiquitin-like modifier (ISG15), mRNA [NM_005101]	5.57741e-05	54.1919
A_23_P126782	F3	NM_001993	Homo sapiens coagulation factor III (thromboplastin, tissue factor) (F3), mRNA [NM_001993]	1.13179e-05	53.7889
A_23_P431388	SPOCD1	NM_144569	Homo sapiens SPOC domain containing 1 (SPOCD1), mRNA [NM_144569]	3.84668e-07	53.0433
A_23_P60296	OSTF1	NM_012383	Homo sapiens osteoclast stimulating factor 1 (OSTF1), mRNA [NM_012383]	7.01618e-08	52.9651
A_23_P78248	KRT23	NM_015515	Homo sapiens keratin 23 (histone deacetylase inducible) (KRT23), mRNA [NM_015515]	0.000390543	52.9432
A_23_P210001	PAX8	NM_013992	Homo sapiens paired box gene 8 (PAX8), transcript variant PAX8E, mRNA [NM_013992]	2.01682e-08	52.9303
A_23_P99540	ZFP36L1	NM_004926	Homo sapiens zinc finger protein 36, C3H type-like 1 (ZFP36L1), mRNA [NM_004926]	2.41349e-09	52.1496
A_23_P122863	GRB10	NM_001001555	Homo sapiens growth factor receptor-bound protein 10 (GRB10), transcript variant 4, mRNA [NM_001001555]	4.38801e-08	52.1155
A_23_P214267	GPR110	NM_153840	Homo sapiens G protein-coupled receptor 110 (GPR110), transcript variant 1, mRNA [NM_153840]	7.39755e-07	51.9579
A_24_P82106	MMP14	NM_004995	Homo sapiens matrix metallopeptidase 14 (membrane-inserted) (MMP14), mRNA [NM_004995]	2.73343e-06	51.8082
A_23_P400298	PRSS22	NM_022119	Homo sapiens protease, serine, 22 (PRSS22), mRNA [NM_022119]	2.05413e-06	51.5654
A_23_P53557	LTBR	NM_002342	Homo sapiens lymphotoxin beta receptor (TNFR superfamily, member 3) (LTBR), mRNA [NM_002342]	1.67519e-08	50.909
A_23_P50081	IMPA2	NM_014214	Homo sapiens inositol(myo)-1(or 4)-monophosphatase 2 (IMPA2), mRNA [NM_014214]	3.91232e-10	50.7218
A_23_P101193	MYO5B	AK025336	Homo sapiens cDNA: FLJ21683 fis, clone COL09335. [AK025336]	2.72941e-05	50.4531
A_23_P351275	UPP1	NM_181597	Homo sapiens uridine phosphorylase 1 (UPP1), transcript variant 2, mRNA [NM_181597]	0.00142846	50.0134
A_23_P304716	HES2	NM_019089	Homo sapiens hairy and enhancer of split 2 (Drosophila) (HES2), mRNA [NM_019089]	2.12588e-05	49.6899
A_23_P162589	VDR	NM_001017535	Homo sapiens vitamin D (1,25- dihydroxyvitamin D3) receptor (VDR), transcript variant 2, mRNA [NM_001017535]	2.60489e-07	49.6313
A_24_P273647	LOC146439	AL833749	Homo sapiens mRNA; cDNA DKFZp666L166 (from clone DKFZp666L166). [AL833749]	1.47007e-05	49.1029
A_23_P6674	LXN	NM_020169	Homo sapiens latexin (LXN), mRNA [NM_020169]	0.000577029	49.0926
A_32_P164246	FOXQ1	NM_033260	Homo sapiens forkhead box Q1 (FOXQ1), mRNA [NM_033260]	5.54897e-07	48.5721
A_23_P306203	SAA2	BC058008	Homo sapiens cDNA clone IMAGE:4716555, partial cds. [BC058008]	0.00839616	48.5238
A_24_P300777	ADAM8	NM_001109	Homo sapiens ADAM metallopeptidase domain 8 (ADAM8), mRNA [NM_001109]	7.83861e-08	47.9232
A_23_P144071	COL7A1	NM_000094	Homo sapiens collagen, type VII, alpha 1 (epidermolysis bullosa, dystrophic, dominant and recessive) (COL7A1), mRNA [NM_000094]	1.05046e-06	47.8033
A_23_P69109	PLSCR1	NM_021105	Homo sapiens phospholipid scramblase 1 (PLSCR1), mRNA [NM_021105]	1.29403e-05	47.4804
A_23_P139500	BHLHB3	NM_030762	Homo sapiens basic helix-loop-helix domain containing, class B, 3 (BHLHB3), mRNA [NM_030762]	0.000722081	47.3341
A_23_P217797	DDX3Y	NM_004660	Homo sapiens DEAD (Asp-Glu-Ala-Asp) box polypeptide 3, Y-linked (DDX3Y), mRNA [NM_004660]	9.84967e-13	47.1429
A_23_P98304	TMEM16A	NM_018043	Homo sapiens transmembrane protein 16A (TMEM16A), mRNA [NM_018043]	5.24639e-07	47.1266
A_23_P25187	KRT81	NM_002281	Homo sapiens keratin, hair, basic, 1 (KRTHB1), mRNA [NM_002281]	1.02187e-07	46.7282
A_23_P404667	BIK	NM_001197	Homo sapiens BCL2-interacting killer (apoptosis-inducing) (BIK), mRNA [NM_001197]	1.61884e-08	46.3325
A_23_P58642	PITX1	NM_002653	Homo sapiens paired-like homeodomain transcription factor 1 (PITX1), mRNA [NM_002653]	0.000179832	45.9624
A_23_P136978	SRPX2	NM_014467	Homo sapiens sushi-repeat-containing protein, X-linked 2 (SRPX2), mRNA [NM_014467]	1.55359e-07	45.9135
A_23_P49060	SPINT1	NM_003710	Homo sapiens serine peptidase inhibitor, Kunitz type 1 (SPINT1), transcript variant 2, mRNA [NM_003710]	4.83521e-07	45.7776
A_23_P147822	EPS8L2	NM_022772	Homo sapiens EPS8-like 2 (EPS8L2), mRNA [NM_022772]	2.99233e-08	45.1478
A_23_P119992	VRK2	NM_006296	Homo sapiens vaccinia related kinase 2 (VRK2), mRNA [NM_006296]	2.78564e-06	44.797
A_23_P94552	TMEM2	NM_013390	Homo sapiens transmembrane protein 2 (TMEM2), mRNA [NM_013390]	1.77351e-07	43.5324
A_23_P104798	IL18	NM_001562	Homo sapiens interleukin 18 (interferon-gamma-inducing factor) (IL18), mRNA [NM_001562]	5.91945e-09	43.399
A_23_P158725	SLC16A3	NM_004207	Homo sapiens solute carrier family 16 (monocarboxylic acid transporters), member 3 (SLC16A3), transcript variant 2, mRNA [NM_004207]	2.34158e-13	43.2054
A_23_P252283	RNF135	NM_032322	Homo sapiens ring finger protein 135 (RNF135), transcript variant 1, mRNA [NM_032322]	8.74472e-10	42.5532
A_23_P33759	DHRS3	NM_004753	Homo sapiens dehydrogenase/reductase (SDR family) member 3 (DHRS3), mRNA [NM_004753]	5.3237e-06	42.4371
A_23_P360329	AIM1L	NM_017977	Homo sapiens absent in melanoma 1-like (AIM1L), mRNA [NM_017977]	4.49284e-06	42.3308
A_23_P126908	TNFRSF14	NM_003820	Homo sapiens tumor necrosis factor receptor superfamily, member 14 (herpesvirus entry mediator) (TNFRSF14), mRNA [NM_003820]	2.65632e-08	42.0808
A_24_P385611	SP100	NM_003113	Homo sapiens SP100 nuclear antigen (SP100), mRNA [NM_003113]	9.52933e-07	41.1858
A_24_P158089	SERPINE1	NM_000602	Homo sapiens serpin peptidase inhibitor, clade E (nexin, plasminogen activator inhibitor type 1), member 1 (SERPINE1), mRNA [NM_000602]	0.000328552	41.0781
A_23_P206724	MT1E	NM_175617	Homo sapiens metallothionein 1E (functional) (MT1E), mRNA [NM_175617]	0.000421642	40.9197
A_23_P213359	PCDH1	NM_032420	Homo sapiens protocadherin 1 (cadherin-like 1) (PCDH1), transcript variant 2, mRNA [NM_032420]	6.63293e-08	40.6259
A_23_P216052	FAM83A	NM_032899	Homo sapiens family with sequence similarity 83, member A (FAM83A), transcript variant 1, mRNA [NM_032899]	3.43674e-09	39.8873
A_23_P75369	TCIRG1	NM_006019	Homo sapiens T-cell, immune regulator 1, ATPase, H+ transporting, lysosomal V0 subunit A3 (TCIRG1), transcript variant 1, mRNA [NM_006019]	2.28792e-07	39.8126
A_23_P209995	IL1RN	NM_173842	Homo sapiens interleukin 1 receptor antagonist (IL1RN), transcript variant 1, mRNA [NM_173842]	2.90625e-07	39.318
A_23_P24903	P2RY2	NM_176072	Homo sapiens purinergic receptor P2Y, G-protein coupled, 2 (P2RY2), transcript variant 1, mRNA [NM_176072]	2.73736e-09	38.8639
A_23_P161563	RAB38	NM_022337	Homo sapiens RAB38, member RAS oncogene family (RAB38), mRNA [NM_022337]	3.23617e-05	38.8141
A_24_P226008	MGLL	NM_007283	Homo sapiens monoglyceride lipase (MGLL), transcript variant 1, mRNA [NM_007283]	8.10673e-07	38.7093
A_23_P111804	PARP12	NM_022750	Homo sapiens poly (ADP-ribose) polymerase family, member 12 (PARP12), mRNA [NM_022750]	2.35134e-05	38.7038
A_23_P427703	MT1L	NR_001447	Homo sapiens metallothionein 1L (MT1L) on chromosome 16 [NR_001447]	0.000540254	38.611
A_23_P143348	OVOL2	NM_021220	Homo sapiens ovo-like 2 (Drosophila) (OVOL2), mRNA [NM_021220]	4.64141e-08	38.1255
A_23_P23048	S100A9	NM_002965	Homo sapiens S100 calcium binding protein A9 (calgranulin B) (S100A9), mRNA [NM_002965]	0.000192546	38.0129
A_23_P3038	GPX2	NM_002083	Homo sapiens glutathione peroxidase 2 (gastrointestinal) (GPX2), mRNA [NM_002083]	1.09541e-05	38.0036
A_23_P51926	PTAFR	NM_000952	Homo sapiens platelet-activating factor receptor (PTAFR), mRNA [NM_000952]	1.48606e-08	37.1486
A_24_P108517	CRB3	NM_174881	Homo sapiens crumbs homolog 3 (Drosophila) (CRB3), transcript variant 3, mRNA [NM_174881]	4.16529e-05	36.9615
A_23_P159125	SLC16A5	NM_004695	Homo sapiens solute carrier family 16 (monocarboxylic acid transporters), member 5 (SLC16A5), mRNA [NM_004695]	5.65374e-07	36.8493
A_24_P709377	LOC654433	BC036699	Homo sapiens cDNA clone IMAGE:5266296. [BC036699]	1.0033e-07	36.1675
A_24_P210406	KLF5	NM_001730	Homo sapiens Kruppel-like factor 5 (intestinal) (KLF5), mRNA [NM_001730]	3.48843e-05	36.0886
A_23_P91390	THBD	NM_000361	Homo sapiens thrombomodulin (THBD), mRNA [NM_000361]	2.41187e-05	35.9183
A_23_P255263	STOM	NM_198194	Homo sapiens stomatin (STOM), transcript variant 2, mRNA [NM_198194]	5.45991e-07	35.8978
A_23_P170186	OPLAH	NM_017570	Homo sapiens 5-oxoprolinase (ATP-hydrolysing) (OPLAH), mRNA [NM_017570]	1.38446e-05	35.5675
A_23_P257516	MICA	NM_000247	Homo sapiens MHC class I polypeptide-related sequence A (MICA), mRNA [NM_000247]	2.28024e-09	35.5338
A_24_P472055	RNF125	AK027134	Homo sapiens cDNA: FLJ23481 fis, clone KAIA03003. [AK027134]	8.09221e-07	35.2892
A_23_P138194	NCF2	NM_000433	Homo sapiens neutrophil cytosolic factor 2 (65kDa, chronic granulomatous disease, autosomal 2) (NCF2), mRNA [NM_000433]	9.58692e-07	35.2386
A_23_P208389	AXL	NM_021913	Homo sapiens AXL receptor tyrosine kinase (AXL), transcript variant 1, mRNA [NM_021913]	3.4183e-08	34.4953
A_23_P326160	ZC3H12A	NM_025079	Homo sapiens zinc finger CCCH-type containing 12A (ZC3H12A), mRNA [NM_025079]	7.5911e-05	34.2696
A_23_P40240	CTSZ	NM_001336	Homo sapiens cathepsin Z (CTSZ), mRNA [NM_001336]	1.82558e-06	34.1744
A_24_P194081	FXYD5	NM_144779	Homo sapiens FXYD domain containing ion transport regulator 5 (FXYD5), transcript variant 1, mRNA [NM_144779]	1.06041e-09	34.1291
A_23_P47614	PHLDA2	NM_003311	Homo sapiens pleckstrin homology-like domain, family A, member 2 (PHLDA2), mRNA [NM_003311]	1.09744e-07	33.9222
A_23_P330461	TMC4	NM_144686	Homo sapiens transmembrane channel-like 4 (TMC4), mRNA [NM_144686]	1.43228e-06	33.904
A_23_P38346	LGP2	NM_024119	Homo sapiens likely ortholog of mouse D11lgp2 (LGP2), mRNA [NM_024119]	0.000116359	33.8947
A_24_P402080	MBP	NM_002385	Homo sapiens myelin basic protein (MBP), transcript variant 2, mRNA [NM_002385]	1.89647e-09	33.7067
A_23_P18559	INPP4B	BC005273	Homo sapiens inositol polyphosphate-4-phosphatase, type II, 105kDa, mRNA (cDNA clone IMAGE:3685423), complete cds. [BC005273]	6.17572e-11	33.6682
A_23_P54291	DUOX1	NM_017434	Homo sapiens dual oxidase 1 (DUOX1), transcript variant 1, mRNA [NM_017434]	1.83689e-10	33.6203
A_23_P32036	C9orf95	NM_017881	Homo sapiens chromosome 9 open reading frame 95 (C9orf95), mRNA [NM_017881]	1.57232e-07	33.1704
A_23_P128323	SCNN1A	NM_001038	Homo sapiens sodium channel, nonvoltage-gated 1 alpha (SCNN1A), mRNA [NM_001038]	4.15256e-07	32.8465
A_24_P235429	ABCA1	NM_005502	Homo sapiens ATP-binding cassette, sub-family A (ABC1), member 1 (ABCA1), mRNA [NM_005502]	2.2563e-06	32.8257
A_24_P239606	GADD45B	NM_015675	Homo sapiens growth arrest and DNA-damage-inducible, beta (GADD45B), mRNA [NM_015675]	1.25227e-06	32.4414
A_23_P340123	TRIM29	NM_012101	Homo sapiens tripartite motif-containing 29 (TRIM29), mRNA [NM_012101]	1.90414e-07	32.4311
A_24_P406060	IBRDC2	NM_182757	Homo sapiens IBR domain containing 2 (IBRDC2), mRNA [NM_182757]	1.4378e-06	32.2767
A_23_P2745	GJB6	NM_006783	Homo sapiens gap junction protein, beta 6 (connexin 30) (GJB6), mRNA [NM_006783]	1.66758e-05	31.9014
A_23_P1782	CD82	NM_002231	Homo sapiens CD82 molecule (CD82), transcript variant 1, mRNA [NM_002231]	0.00012983	31.8269
A_24_P335620	SLC7A5	NM_003486	Homo sapiens solute carrier family 7 (cationic amino acid transporter, y+ system), member 5 (SLC7A5), mRNA [NM_003486]	8.70112e-08	31.746
A_23_P45365	COL4A5	NM_033380	Homo sapiens collagen, type IV, alpha 5 (Alport syndrome) (COL4A5), transcript variant 2, mRNA [NM_033380]	3.1878e-09	31.4044
A_23_P11629	TMEM61	NM_182532	Homo sapiens transmembrane protein 61 (TMEM61), mRNA [NM_182532]	1.72033e-06	31.2952
A_23_P46390	SYTL1	NM_032872	Homo sapiens synaptotagmin-like 1 (SYTL1), mRNA [NM_032872]	8.78407e-06	31.2415
A_32_P107372	GBP1	NM_002053	Homo sapiens guanylate binding protein 1, interferon-inducible, 67kDa (GBP1), mRNA [NM_002053]	3.50366e-07	31.1827
A_23_P214176	CD109	NM_133493	Homo sapiens CD109 molecule (CD109), mRNA [NM_133493]	4.39488e-05	30.9841
A_24_P329487	FAM84B	NM_174911	Homo sapiens family with sequence similarity 84, member B (FAM84B), mRNA [NM_174911]	4.52184e-08	30.8333
A_23_P377291	TGFA	NM_003236	Homo sapiens transforming growth factor, alpha (TGFA), mRNA [NM_003236]	2.05224e-09	30.8029
A_23_P101505	KLK11	NM_144947	Homo sapiens kallikrein 11 (KLK11), transcript variant 2, mRNA [NM_144947]	8.36825e-06	30.7191
A_23_P425332	KIAA1622	NM_058237	Homo sapiens KIAA1622 (KIAA1622), transcript variant 1, mRNA [NM_058237]	2.01222e-08	30.6486
A_23_P397293	LY6K	CR627188	Homo sapiens mRNA; cDNA DKFZp781D082 (from clone DKFZp781D082). [CR627188]	0.0005251	30.3608
A_23_P101759	FUT5	NM_002034	Homo sapiens fucosyltransferase 5 (alpha (1,3) fucosyltransferase) (FUT5), mRNA [NM_002034]	6.40399e-06	30.3262
A_24_P360674	CDKN2B	NM_004936	Homo sapiens cyclin-dependent kinase inhibitor 2B (p15, inhibits CDK4) (CDKN2B), transcript variant 1, mRNA [NM_004936]	8.50292e-06	30.3027
A_23_P53663	PAWR	NM_002583	Homo sapiens PRKC, apoptosis, WT1, regulator (PAWR), mRNA [NM_002583]	2.19588e-05	30.2342
A_24_P408736	GALNT5	NM_014568	Homo sapiens UDP-N-acetyl-alpha-D-galactosamine:polypeptide N-acetylgalactosaminyltransferase 5 (GalNAc-T5) (GALNT5), mRNA [NM_014568]	3.15269e-06	30.0284
A_24_P163009	FLJ38359	AK095678	Homo sapiens cDNA FLJ38359 fis, clone FEBRA2000321. [AK095678]	2.91361e-07	29.6095
A_24_P280983	HOXA11S	NR_002795	Homo sapiens homeo box A11, antisense (HOXA11S) on chromosome 7 [NR_002795]	1.67457e-08	29.5705
A_23_P20494	NDRG1	NM_006096	Homo sapiens N-myc downstream regulated gene 1 (NDRG1), mRNA [NM_006096]	2.57735e-08	29.3902
A_23_P73593	MSN	NM_002444	Homo sapiens moesin (MSN), mRNA [NM_002444]	2.04576e-07	28.6303
A_24_P228149	KRT13	NM_002274	Homo sapiens keratin 13 (KRT13), transcript variant 2, mRNA [NM_002274]	1.26834e-05	28.5896
A_24_P268676	BHLHB2	NM_003670	Homo sapiens basic helix-loop-helix domain containing, class B, 2 (BHLHB2), mRNA [NM_003670]	7.90987e-07	28.538
A_23_P211267	RIPK4	NM_020639	Homo sapiens receptor-interacting serine-threonine kinase 4 (RIPK4), mRNA [NM_020639]	2.04589e-05	28.4805
A_23_P68155	IFIH1	NM_022168	Homo sapiens interferon induced with helicase C domain 1 (IFIH1), mRNA [NM_022168]	0.000354186	28.3409
A_23_P64721	GPR109B	NM_006018	Homo sapiens G protein-coupled receptor 109B (GPR109B), mRNA [NM_006018]	0.002092	28.1459
A_23_P7882	C6orf85	NM_021945	Homo sapiens chromosome 6 open reading frame 85 (C6orf85), mRNA [NM_021945]	3.60049e-06	28.1078
A_23_P210176	ITGA6	NM_000210	Homo sapiens integrin, alpha 6 (ITGA6), mRNA [NM_000210]	5.29771e-07	28.1065
A_23_P49610	MGC14376	NM_032895	Homo sapiens hypothetical protein MGC14376 (MGC14376), transcript variant 1, mRNA [NM_032895]	6.48596e-06	28.0292
A_23_P64372	TCN1	NM_001062	Homo sapiens transcobalamin I (vitamin B12 binding protein, R binder family) (TCN1), mRNA [NM_001062]	0.000101103	27.8437
A_23_P123666	TBC1D2	NM_018421	Homo sapiens TBC1 domain family, member 2 (TBC1D2), mRNA [NM_018421]	6.45752e-09	27.5647
A_24_P172481	TRIM22	NM_006074	Homo sapiens tripartite motif-containing 22 (TRIM22), mRNA [NM_006074]	3.30604e-05	27.4459
A_23_P88589	NR2F2	NM_021005	Homo sapiens nuclear receptor subfamily 2, group F, member 2 (NR2F2), mRNA [NM_021005]	7.75146e-07	27.0773
A_23_P121253	TNFSF10	NM_003810	Homo sapiens tumor necrosis factor (ligand) superfamily, member 10 (TNFSF10), mRNA [NM_003810]	0.000335955	26.9407
A_23_P85585	TINAGL1	NM_022164	Homo sapiens tubulointerstitial nephritis antigen-like 1 (TINAGL1), mRNA [NM_022164]	2.43155e-05	26.8997
A_23_P4561	SERPINB8	NM_198833	Homo sapiens serpin peptidase inhibitor, clade B (ovalbumin), member 8 (SERPINB8), transcript variant 2, mRNA [NM_198833]	1.82963e-05	26.873
A_24_P399490	KLK10	NM_002776	Homo sapiens kallikrein 10 (KLK10), transcript variant 1, mRNA [NM_002776]	9.84602e-05	26.8014
A_23_P303242	MT1X	NM_005952	Homo sapiens metallothionein 1X (MT1X), mRNA [NM_005952]	9.07823e-05	26.4696
A_23_P106906	PPL	NM_002705	Homo sapiens periplakin (PPL), mRNA [NM_002705]	0.000548896	26.379
A_23_P250516	LOC284120	XM_211339	PREDICTED: Homo sapiens hypothetical LOC284120 (LOC284120), mRNA [XM_211339]	1.03945e-08	26.3185
A_23_P259127	RBM35A	NM_017697	Homo sapiens RNA binding motif protein 35A (RBM35A), transcript variant 1, mRNA [NM_017697]	8.3742e-05	26.2411
A_23_P26890	MMP28	NM_024302	Homo sapiens matrix metallopeptidase 28 (MMP28), transcript variant 1, mRNA [NM_024302]	1.46428e-06	26.1621
A_23_P32404	ISG20	NM_002201	Homo sapiens interferon stimulated exonuclease gene 20kDa (ISG20), mRNA [NM_002201]	1.93981e-06	26.1058
A_23_P2181	CYB5R2	NM_016229	Homo sapiens cytochrome b5 reductase 2 (CYB5R2), mRNA [NM_016229]	1.97086e-05	26.0016
A_24_P4054	TRIP6	NM_003302	Homo sapiens thyroid hormone receptor interactor 6 (TRIP6), mRNA [NM_003302]	3.3497e-07	25.9804
A_23_P397910	CBLC	NM_012116	Homo sapiens Cas-Br-M (murine) ecotropic retroviral transforming sequence c (CBLC), mRNA [NM_012116]	2.2458e-06	25.5803
A_23_P131899	SDCBP2	NM_080489	Homo sapiens syndecan binding protein (syntenin) 2 (SDCBP2), transcript variant 1, mRNA [NM_080489]	1.83598e-07	25.4925
A_23_P414343	MT1H	NM_005951	Homo sapiens metallothionein 1H (MT1H), mRNA [NM_005951]	2.71556e-05	25.3945
A_24_P35228	GRHL2	NM_024915	Homo sapiens grainyhead-like 2 (Drosophila) (GRHL2), mRNA [NM_024915]	1.4396e-10	25.2612
A_23_P142974	ARHGAP25	NM_001007231	Homo sapiens Rho GTPase activating protein 25 (ARHGAP25), transcript variant 1, mRNA [NM_001007231]	7.43952e-06	25.2495
A_23_P29773	LAMP3	NM_014398	Homo sapiens lysosomal-associated membrane protein 3 (LAMP3), mRNA [NM_014398]	0.000385377	25.205
A_23_P347632	MTSS1	NM_014751	Homo sapiens metastasis suppressor 1 (MTSS1), mRNA [NM_014751]	2.41615e-06	24.8893
A_24_P62469	PLCH2	NM_014638	Homo sapiens phospholipase C, eta 2 (PLCH2), mRNA [NM_014638]	4.3084e-08	24.8233
A_23_P141730	DSG2	NM_001943	Homo sapiens desmoglein 2 (DSG2), mRNA [NM_001943]	1.00579e-07	24.6986
A_23_P258410	WNT7A	NM_004625	Homo sapiens wingless-type MMTV integration site family, member 7A (WNT7A), mRNA [NM_004625]	3.07292e-05	24.338
A_23_P206707	MT1G	NM_005950	Homo sapiens metallothionein 1G (MT1G), mRNA [NM_005950]	0.00115878	24.1815
A_32_P209230	CITED4	NM_133467	Homo sapiens Cbp/p300-interacting transactivator, with Glu/Asp-rich carboxy-terminal domain, 4 (CITED4), mRNA [NM_133467]	0.000151298	24.0875
A_23_P110686	STC2	NM_003714	Homo sapiens stanniocalcin 2 (STC2), mRNA [NM_003714]	5.87978e-05	23.9498
A_23_P78518	CEACAM19	NM_020219	Homo sapiens carcinoembryonic antigen-related cell adhesion molecule 19 (CEACAM19), mRNA [NM_020219]	2.00961e-05	23.9453
A_23_P46315	DENND2C	NM_198459	Homo sapiens DENN/MADD domain containing 2C (DENND2C), mRNA [NM_198459]	1.50379e-05	23.899
A_23_P24004	IFIT2	NM_001547	Homo sapiens interferon-induced protein with tetratricopeptide repeats 2 (IFIT2), mRNA [NM_001547]	0.00140557	23.8152
A_24_P148521	TMBIM1	NM_022152	Homo sapiens transmembrane BAX inhibitor motif containing 1 (TMBIM1), mRNA [NM_022152]	1.01143e-07	23.6787
A_24_P157926	TNFAIP3	NM_006290	Homo sapiens tumor necrosis factor, alpha-induced protein 3 (TNFAIP3), mRNA [NM_006290]	0.00379897	23.5365
A_23_P142075	ACP5	NM_001611	Homo sapiens acid phosphatase 5, tartrate resistant (ACP5), mRNA [NM_001611]	0.00016049	23.4838
A_23_P17655	KCNJ15	NM_170736	Homo sapiens potassium inwardly-rectifying channel, subfamily J, member 15 (KCNJ15), transcript variant 1, mRNA [NM_170736]	0.00196289	23.2998
A_23_P37983	MT1B	NM_005947	Homo sapiens metallothionein 1B (functional) (MT1B), mRNA [NM_005947]	0.0017049	23.2263
A_23_P432978	SERPINB13	NM_012397	Homo sapiens serpin peptidase inhibitor, clade B (ovalbumin), member 13 (SERPINB13), mRNA [NM_012397]	3.20402e-05	23.1158
A_23_P124084	LOXL1	NM_005576	Homo sapiens lysyl oxidase-like 1 (LOXL1), mRNA [NM_005576]	9.70696e-09	23.0481
A_23_P34597	CDA	NM_001785	Homo sapiens cytidine deaminase (CDA), mRNA [NM_001785]	1.93203e-08	22.9767
A_23_P35912	CASP4	NM_033306	Homo sapiens caspase 4, apoptosis-related cysteine peptidase (CASP4), transcript variant gamma, mRNA [NM_033306]	4.81282e-07	22.7174
A_24_P941167	APOL6	NM_030641	Homo sapiens apolipoprotein L, 6 (APOL6), mRNA [NM_030641]	0.000105776	22.2965
A_23_P57089	TMEPAI	NM_020182	Homo sapiens transmembrane, prostate androgen induced RNA (TMEPAI), transcript variant 1, mRNA [NM_020182]	1.42907e-05	22.2945
A_23_P202206	GSTO2	NM_183239	Homo sapiens glutathione S-transferase omega 2 (GSTO2), mRNA [NM_183239]	2.79598e-10	22.0079
A_23_P402899	SLFN5	NM_144975	Homo sapiens schlafen family member 5 (SLFN5), mRNA [NM_144975]	1.32066e-07	21.9853
A_23_P32233	KLF4	NM_004235	Homo sapiens Kruppel-like factor 4 (gut) (KLF4), mRNA [NM_004235]	0.000698046	21.917
A_23_P31810	CEBPD	NM_005195	Homo sapiens CCAAT/enhancer binding protein (C/EBP), delta (CEBPD), mRNA [NM_005195]	9.20207e-07	21.606
A_24_P150803	PRSS8	NM_002773	Homo sapiens protease, serine, 8 (prostasin) (PRSS8), mRNA [NM_002773]	1.73248e-06	21.568
A_23_P37127	FOXA1	NM_004496	Homo sapiens forkhead box A1 (FOXA1), mRNA [NM_004496]	4.6389e-08	21.5675
A_24_P262728	SH2D3A	NM_005490	Homo sapiens SH2 domain containing 3A (SH2D3A), mRNA [NM_005490]	3.5151e-07	21.4951
A_23_P157247	MGC9712	NM_152689	Homo sapiens hypothetical protein MGC9712 (MGC9712), mRNA [NM_152689]	2.99659e-07	21.3879
A_23_P65174	PHF11	NM_001040443	Homo sapiens PHD finger protein 11 (PHF11), transcript variant 1, mRNA [NM_001040443]	2.2463e-06	21.3501
A_23_P1523	RHOD	NM_014578	Homo sapiens ras homolog gene family, member D (RHOD), mRNA [NM_014578]	1.42418e-05	21.3151
A_24_P203328	TPRXL	NR_002223	Homo sapiens tetra-peptide repeat homeobox-like (TPRXL) on chromosome 3 [NR_002223]	1.79983e-09	21.1253
A_23_P11071	PORCN	NM_203473	Homo sapiens porcupine homolog (Drosophila) (PORCN), transcript variant B, mRNA [NM_203473]	1.55585e-07	20.9295
A_23_P13094	MMP10	NM_002425	Homo sapiens matrix metallopeptidase 10 (stromelysin 2) (MMP10), mRNA [NM_002425]	0.00133724	20.7067
A_24_P71468	QPCT	NM_012413	Homo sapiens glutaminyl-peptide cyclotransferase (glutaminyl cyclase) (QPCT), mRNA [NM_012413]	2.44486e-05	20.705
A_23_P118203	LOC124220	NM_145252	Homo sapiens similar to common salivary protein 1 (LOC124220), mRNA [NM_145252]	0.00145465	20.5102
A_23_P78543	AP1M2	NM_005498	Homo sapiens adaptor-related protein complex 1, mu 2 subunit (AP1M2), mRNA [NM_005498]	2.593e-09	20.3546
A_23_P209625	CYP1B1	NM_000104	Homo sapiens cytochrome P450, family 1, subfamily B, polypeptide 1 (CYP1B1), mRNA [NM_000104]	0.00151144	20.336
A_23_P214330	SERPINB1	NM_030666	Homo sapiens serpin peptidase inhibitor, clade B (ovalbumin), member 1 (SERPINB1), mRNA [NM_030666]	3.66275e-06	20.281
A_32_P99100	PTPRK	NM_002844	Homo sapiens protein tyrosine phosphatase, receptor type, K (PTPRK), mRNA [NM_002844]	8.52102e-09	20.2673
A_23_P256735	PGCP	NM_016134	Homo sapiens plasma glutamate carboxypeptidase (PGCP), mRNA [NM_016134]	2.94963e-10	20.2302
A_23_P381714	CA13	NM_198584	Homo sapiens carbonic anhydrase XIII (CA13), mRNA [NM_198584]	2.33101e-05	20.0939
A_23_P203540	EHF	NM_012153	Homo sapiens ets homologous factor (EHF), mRNA [NM_012153]	2.96003e-08	20.0821
A_24_P169773	CTAGE4	AF338232	Homo sapiens CTAGE-4 protein mRNA, complete cds. [AF338232]	7.34648e-06	19.8657
A_24_P410408	KRT83	NM_002282	Homo sapiens keratin, hair, basic, 3 (KRTHB3), mRNA [NM_002282]	5.62951e-07	19.8161
A_23_P204630	NTN4	NM_021229	Homo sapiens netrin 4 (NTN4), mRNA [NM_021229]	0.000593853	19.5938
A_23_P252062	PPARG	NM_138711	Homo sapiens peroxisome proliferative activated receptor, gamma (PPARG), transcript variant 3, mRNA [NM_138711]	1.02445e-06	19.5538
A_24_P251053	EFHD2	NM_024329	Homo sapiens EF-hand domain family, member D2 (EFHD2), mRNA [NM_024329]	1.00736e-06	19.4438
A_23_P57570	A4GALT	NM_017436	Homo sapiens alpha 1,4-galactosyltransferase (globotriaosylceramide synthase) (A4GALT), mRNA [NM_017436]	5.35538e-07	19.4147
A_23_P250156	IGF2BP2	NM_006548	Homo sapiens insulin-like growth factor 2 mRNA binding protein 2 (IGF2BP2), transcript variant 1, mRNA [NM_006548]	5.47038e-09	19.3931
A_23_P64173	COP1	BC033638	Homo sapiens caspase-1 dominant-negative inhibitor pseudo-ICE, mRNA (cDNA clone IMAGE:5221546). [BC033638]	1.54305e-06	19.2792
A_23_P382188	STAP2	NM_001013841	Homo sapiens signal-transducing adaptor protein-2 (STAP2), transcript variant 2, mRNA [NM_001013841]	3.07689e-10	19.2132
A_23_P128773	CTAGE5	NM_203356	Homo sapiens CTAGE family, member 5 (CTAGE5), transcript variant 4, mRNA [NM_203356]	3.06125e-05	19.2081
A_23_P393034	HAS3	NM_005329	Homo sapiens hyaluronan synthase 3 (HAS3), transcript variant 1, mRNA [NM_005329]	0.00106145	19.1464
A_23_P132115	SNF1LK	NM_173354	Homo sapiens SNF1-like kinase (SNF1LK), mRNA [NM_173354]	1.22771e-06	18.942
A_23_P416314	HRASLS5	BC034222	Homo sapiens HRAS-like suppressor family, member 5, mRNA (cDNA clone MGC:39540 IMAGE:5268703), complete cds. [BC034222]	2.65899e-07	18.8201
A_23_P56659	DQX1	NM_133637	Homo sapiens DEAQ box polypeptide 1 (RNA-dependent ATPase) (DQX1), mRNA [NM_133637]	2.66016e-07	18.796
A_23_P114740	CFHR1	NM_002113	Homo sapiens complement factor H-related 1 (CFHR1), mRNA [NM_002113]	4.84835e-07	18.7786
A_23_P353524	IVL	NM_005547	Homo sapiens involucrin (IVL), mRNA [NM_005547]	5.10771e-05	18.7596
A_23_P71379	PSCA	NM_005672	Homo sapiens prostate stem cell antigen (PSCA), mRNA [NM_005672]	0.0021714	18.6295
A_23_P91802	ECGF1	NM_001953	Homo sapiens endothelial cell growth factor 1 (platelet-derived) (ECGF1), mRNA [NM_001953]	9.63973e-05	18.6264
A_23_P304450	GATA6	NM_005257	Homo sapiens GATA binding protein 6 (GATA6), mRNA [NM_005257]	5.03002e-07	18.5703
A_23_P7250	CDS1	NM_001263	Homo sapiens CDP-diacylglycerol synthase (phosphatidate cytidylyltransferase) 1 (CDS1), mRNA [NM_001263]	1.26148e-06	18.3036
A_23_P26024	C15orf48	NM_032413	Homo sapiens chromosome 15 open reading frame 48 (C15orf48), transcript variant 2, mRNA [NM_032413]	0.00196453	18.1815
A_23_P127948	ADM	NM_001124	Homo sapiens adrenomedullin (ADM), mRNA [NM_001124]	0.000239106	18.1246
A_24_P915692	PHLDA1	NM_007350	Homo sapiens pleckstrin homology-like domain, family A, member 1 (PHLDA1), mRNA [NM_007350]	6.48643e-09	18.1162
A_23_P321913	DEF6	NM_022047	Homo sapiens differentially expressed in FDCP 6 homolog (mouse) (DEF6), mRNA [NM_022047]	1.22761e-10	18.0119
A_23_P258312	NAPRT1	NM_145201	Homo sapiens nicotinate phosphoribosyltransferase domain containing 1 (NAPRT1), mRNA [NM_145201]	6.91752e-05	17.8892
A_23_P92222	MUC20	NM_152673	Homo sapiens mucin 20, cell surface associated (MUC20), mRNA [NM_152673]	0.00162562	17.8697
A_32_P117016	ALDH1L2	CR749561	Homo sapiens mRNA; cDNA DKFZp686A16126 (from clone DKFZp686A16126). [CR749561]	0.000998189	17.8466
A_23_P24077	C10orf54	NM_022153	Homo sapiens chromosome 10 open reading frame 54 (C10orf54), mRNA [NM_022153]	0.000208203	17.8188
A_23_P143713	APOBEC3G	NM_021822	Homo sapiens apolipoprotein B mRNA editing enzyme, catalytic polypeptide-like 3G (APOBEC3G), mRNA [NM_021822]	1.42444e-06	17.7568
A_23_P257971	AKR1C1	NM_001353	Homo sapiens aldo-keto reductase family 1, member C1 (dihydrodiol dehydrogenase 1; 20-alpha (3-alpha)-hydroxysteroid dehydrogenase) (AKR1C1), mRNA [NM_001353]	2.72659e-05	17.7447
A_23_P141802	SERPINB7	NM_003784	Homo sapiens serpin peptidase inhibitor, clade B (ovalbumin), member 7 (SERPINB7), transcript variant 1, mRNA [NM_003784]	2.45192e-05	17.6556
A_23_P206212	THBS1	NM_003246	Homo sapiens thrombospondin 1 (THBS1), mRNA [NM_003246]	0.000584151	17.6498
A_23_P306215	FAM84A	NM_145175	Homo sapiens family with sequence similarity 84, member A (FAM84A), mRNA [NM_145175]	3.64985e-05	17.6108
A_24_P262543	KCNK6	NM_004823	Homo sapiens potassium channel, subfamily K, member 6 (KCNK6), mRNA [NM_004823]	2.90598e-07	17.5054
A_23_P139786	OASL	NM_003733	Homo sapiens 2'-5'-oligoadenylate synthetase-like (OASL), transcript variant 1, mRNA [NM_003733]	0.00148824	17.4931
A_23_P47304	CASP5	NM_004347	Homo sapiens caspase 5, apoptosis-related cysteine peptidase (CASP5), mRNA [NM_004347]	4.90998e-07	17.3901
A_23_P256312	MST1R	NM_002447	Homo sapiens macrophage stimulating 1 receptor (c-met-related tyrosine kinase) (MST1R), mRNA [NM_002447]	2.60736e-06	17.376
A_23_P8913	CA2	NM_000067	Homo sapiens carbonic anhydrase II (CA2), mRNA [NM_000067]	1.75732e-05	17.3232
A_23_P369966	APOBEC3D	CR456396	Homo sapiens bK150C2.9 full length open reading frame (ORF) cDNA clone (cDNA clone C22ORF:pGEM.bK150C2.9). [CR456396]	7.60871e-08	17.2374
A_23_P3934	RNF43	NM_017763	Homo sapiens ring finger protein 43 (RNF43), mRNA [NM_017763]	1.72122e-10	17.1142
A_32_P46571	RHBDL2	NM_017821	Homo sapiens rhomboid, veinlet-like 2 (Drosophila) (RHBDL2), mRNA [NM_017821]	0.000309539	17.0137
A_24_P250922	PTGS2	NM_000963	Homo sapiens prostaglandin-endoperoxide synthase 2 (prostaglandin G/H synthase and cyclooxygenase) (PTGS2), mRNA [NM_000963]	1.97885e-06	16.9961
A_23_P109034	SDC4	NM_002999	Homo sapiens syndecan 4 (amphiglycan, ryudocan) (SDC4), mRNA [NM_002999]	5.54545e-06	16.7924
A_24_P85099	HMGA2	NM_003483	Homo sapiens high mobility group AT-hook 2 (HMGA2), transcript variant 1, mRNA [NM_003483]	2.81606e-06	16.7839
A_23_P359277	ELOVL7	NM_024930	Homo sapiens ELOVL family member 7, elongation of long chain fatty acids (yeast) (ELOVL7), mRNA [NM_024930]	0.000282386	16.7532
A_23_P142389	LSR	NM_205834	Homo sapiens lipolysis stimulated lipoprotein receptor (LSR), transcript variant 2, mRNA [NM_205834]	4.14268e-08	16.684
A_23_P374862	CD55	NM_000574	Homo sapiens CD55 molecule, decay accelerating factor for complement (Cromer blood group) (CD55), mRNA [NM_000574]	0.00740835	16.5548
A_24_P925040	CAV2	NM_001233	Homo sapiens caveolin 2 (CAV2), transcript variant 1, mRNA [NM_001233]	1.51764e-07	16.5452
A_23_P83007	C9orf150	NM_203403	Homo sapiens chromosome 9 open reading frame 150 (C9orf150), mRNA [NM_203403]	0.00131925	16.384
A_23_P372234	CA12	NM_001218	Homo sapiens carbonic anhydrase XII (CA12), transcript variant 1, mRNA [NM_001218]	0.000104289	16.3221
A_23_P106844	MT2A	NM_005953	Homo sapiens metallothionein 2A (MT2A), mRNA [NM_005953]	6.4393e-06	16.3195
A_23_P355244	SAMD9	NM_017654	Homo sapiens sterile alpha motif domain containing 9 (SAMD9), mRNA [NM_017654]	0.000986194	16.3168
A_23_P14072	KRT8	NM_002273	Homo sapiens keratin 8 (KRT8), mRNA [NM_002273]	4.14834e-09	16.1938
A_24_P125469	LIPG	NM_006033	Homo sapiens lipase, endothelial (LIPG), mRNA [NM_006033]	2.01251e-05	16.1602
A_24_P66027	APOBEC3B	NM_004900	Homo sapiens apolipoprotein B mRNA editing enzyme, catalytic polypeptide-like 3B (APOBEC3B), mRNA [NM_004900]	4.33163e-08	16.0621
A_24_P686965	SH2D5	AK124869	Homo sapiens cDNA FLJ42879 fis, clone BRHIP3001283. [AK124869]	6.55843e-05	15.9763
A_24_P945283	DLG3	AB033058	Homo sapiens mRNA for KIAA1232 protein, partial cds. [AB033058]	5.89641e-07	15.8822
A_23_P104073	S100A3	NM_002960	Homo sapiens S100 calcium binding protein A3 (S100A3), mRNA [NM_002960]	7.57389e-06	15.8819
A_23_P55477	ADORA2B	NM_000676	Homo sapiens adenosine A2b receptor (ADORA2B), mRNA [NM_000676]	1.73318e-06	15.7985
A_24_P140608	HBEGF	NM_001945	Homo sapiens heparin-binding EGF-like growth factor (HBEGF), mRNA [NM_001945]	4.70596e-06	15.7692
A_23_P141191	ZNF750	NM_024702	Homo sapiens zinc finger protein 750 (ZNF750), mRNA [NM_024702]	0.00300568	15.7615
A_23_P113701	PDGFA	NM_002607	Homo sapiens platelet-derived growth factor alpha polypeptide (PDGFA), transcript variant 1, mRNA [NM_002607]	6.13568e-07	15.7016
A_23_P80040	PROCR	NM_006404	Homo sapiens protein C receptor, endothelial (EPCR) (PROCR), mRNA [NM_006404]	9.98671e-06	15.6425
A_23_P211910	PLOD2	NM_182943	Homo sapiens procollagen-lysine, 2-oxoglutarate 5-dioxygenase 2 (PLOD2), transcript variant 1, mRNA [NM_182943]	4.71138e-06	15.5204
A_23_P17811	SEC14L2	AB051445	Homo sapiens mRNA for KIAA1658 protein, partial cds. [AB051445]	0.000186221	15.4854
A_23_P166109	FLRT3	NM_198391	Homo sapiens fibronectin leucine rich transmembrane protein 3 (FLRT3), transcript variant 2, mRNA [NM_198391]	2.00402e-05	15.3921
A_23_P23296	PKP1	NM_000299	Homo sapiens plakophilin 1 (ectodermal dysplasia/skin fragility syndrome) (PKP1), transcript variant 1b, mRNA [NM_000299]	6.5444e-07	15.3856
A_23_P59005	TAP1	NM_000593	Homo sapiens transporter 1, ATP-binding cassette, sub-family B (MDR/TAP) (TAP1), mRNA [NM_000593]	2.99595e-05	15.1928
A_23_P35597	C10orf10	NM_007021	Homo sapiens chromosome 10 open reading frame 10 (C10orf10), mRNA [NM_007021]	0.000386145	15.0435
A_24_P319364	F11R	NM_144503	Homo sapiens F11 receptor (F11R), transcript variant 4, mRNA [NM_144503]	1.17845e-09	15.0427
A_23_P205738	BCL11B	AB043584	Homo sapiens mRNA for zinc finger protein hRit1 alpha, complete cds. [AB043584]	1.78375e-06	14.9726
A_32_P165477	SLC7A11	NM_014331	Homo sapiens solute carrier family 7, (cationic amino acid transporter, y+ system) member 11 (SLC7A11), mRNA [NM_014331]	9.61253e-05	14.9671
A_24_P68358	FLJ38020	NM_001039775	Homo sapiens similar to absent in melanoma 1 (FLJ38020), mRNA [NM_001039775]	1.05225e-05	14.9437
A_32_P399546	ARNTL2	AF256215	Homo sapiens cycle-like factor CLIF mRNA, complete cds. [AF256215]	2.41075e-08	14.8959
A_23_P50217	ZNF671	NM_024833	Homo sapiens zinc finger protein 671 (ZNF671), mRNA [NM_024833]	5.62732e-08	14.8672
A_24_P399220	HOXB3	NM_002146	Homo sapiens homeobox B3 (HOXB3), mRNA [NM_002146]	1.89147e-08	14.8149
A_23_P17706	IL17RA	NM_014339	Homo sapiens interleukin 17 receptor A (IL17RA), mRNA [NM_014339]	1.30779e-09	14.8041
A_23_P14774	CTSH	NM_148979	Homo sapiens cathepsin H (CTSH), transcript variant 2, mRNA [NM_148979]	7.75096e-07	14.7679
A_23_P340131	PRSS16	NM_005865	Homo sapiens protease, serine, 16 (thymus) (PRSS16), mRNA [NM_005865]	9.43312e-06	14.6049
A_23_P150379	EVA1	NM_144765	Homo sapiens epithelial V-like antigen 1 (EVA1), transcript variant 2, mRNA [NM_144765]	4.62576e-05	14.5834
A_24_P257416	CXCL2	NM_002089	Homo sapiens chemokine (C-X-C motif) ligand 2 (CXCL2), mRNA [NM_002089]	0.00193215	14.5482
A_23_P22350	GRAMD3	NM_023927	Homo sapiens GRAM domain containing 3 (GRAMD3), mRNA [NM_023927]	6.74215e-08	14.4344
A_23_P151820	RIN3	AK090451	Homo sapiens mRNA for FLJ00372 protein. [AK090451]	7.83955e-08	14.1902
A_23_P1962	RARRES3	NM_004585	Homo sapiens retinoic acid receptor responder (tazarotene induced) 3 (RARRES3), mRNA [NM_004585]	0.000664748	14.1776
A_23_P122127	FYB	NM_001465	Homo sapiens FYN binding protein (FYB-120/130) (FYB), transcript variant 1, mRNA [NM_001465]	0.000165224	14.1495
A_23_P19691	HEBP2	NM_014320	Homo sapiens heme binding protein 2 (HEBP2), mRNA [NM_014320]	3.07102e-07	14.1347
A_23_P97394	BCAR3	NM_003567	Homo sapiens breast cancer anti-estrogen resistance 3 (BCAR3), mRNA [NM_003567]	3.69809e-09	14.0846
A_23_P68121	PSD4	NM_012455	Homo sapiens pleckstrin and Sec7 domain containing 4 (PSD4), mRNA [NM_012455]	7.39361e-09	14.0643
A_23_P47885	LRIG3	NM_153377	Homo sapiens leucine-rich repeats and immunoglobulin-like domains 3 (LRIG3), mRNA [NM_153377]	3.38719e-05	14.0538
A_23_P129556	IL4R	NM_000418	Homo sapiens interleukin 4 receptor (IL4R), transcript variant 1, mRNA [NM_000418]	1.4224e-05	14.0349
A_24_P115183	CLDN4	NM_001305	Homo sapiens claudin 4 (CLDN4), mRNA [NM_001305]	8.55056e-06	14.0035
A_23_P66241	MT1M	NM_176870	Homo sapiens metallothionein 1M (MT1M), mRNA [NM_176870]	0.00029278	13.9534
A_23_P361584	TMEM154	NM_152680	Homo sapiens transmembrane protein 154 (TMEM154), mRNA [NM_152680]	2.23166e-05	13.9117
A_23_P23885	GJB4	NM_153212	Homo sapiens gap junction protein, beta 4 (connexin 30.3) (GJB4), mRNA [NM_153212]	5.13573e-07	13.9051
A_24_P304154	AMPD3	NM_000480	Homo sapiens adenosine monophosphate deaminase (isoform E) (AMPD3), transcript variant 1, mRNA [NM_000480]	5.08062e-09	13.8888
A_23_P314145	UST	NM_005715	Homo sapiens uronyl-2-sulfotransferase (UST), mRNA [NM_005715]	0.000479585	13.8197
A_23_P350074	C19orf46	NM_001039876	Homo sapiens hypothetical protein FLJ36445 (FLJ36445), mRNA [NM_001039876]	2.29528e-06	13.7879
A_23_P123276	FZD6	NM_003506	Homo sapiens frizzled homolog 6 (Drosophila) (FZD6), mRNA [NM_003506]	1.01555e-05	13.7734
A_24_P289178	C16orf74	BC009078	Homo sapiens MGC17624 protein, mRNA (cDNA clone MGC:17624 IMAGE:3855543), complete cds. [BC009078]	0.000390777	13.7619
A_23_P81507	FAT2	NM_001447	Homo sapiens FAT tumor suppressor homolog 2 (Drosophila) (FAT2), mRNA [NM_001447]	1.0102e-06	13.76
A_24_P67280	CTAGE6	BC043153	Homo sapiens CTAGE family, member 6, mRNA (cDNA clone MGC:41943 IMAGE:5296763), complete cds. [BC043153]	1.90282e-05	13.6573
A_23_P364024	GLIPR1	NM_006851	Homo sapiens GLI pathogenesis-related 1 (glioma) (GLIPR1), mRNA [NM_006851]	0.000110302	13.6105
A_24_P236235	FLRT2	NM_013231	Homo sapiens fibronectin leucine rich transmembrane protein 2 (FLRT2), mRNA [NM_013231]	3.02193e-05	13.5229
A_24_P68162	DIP2B	NM_173602	Homo sapiens DIP2 disco-interacting protein 2 homolog B (Drosophila) (DIP2B), mRNA [NM_173602]	4.17615e-09	13.491
A_23_P159956	MID2	NM_012216	Homo sapiens midline 2 (MID2), transcript variant 1, mRNA [NM_012216]	5.88236e-06	13.4505
A_23_P257003	PCSK5	NM_006200	Homo sapiens proprotein convertase subtilisin/kexin type 5 (PCSK5), mRNA [NM_006200]	1.33094e-05	13.3815
A_32_P6015	HLXB9	NM_005515	Homo sapiens homeobox HB9 (HLXB9), mRNA [NM_005515]	0.000114083	13.3165
A_32_P83784	CENTD1	NM_015230	Homo sapiens centaurin, delta 1 (CENTD1), transcript variant 1, mRNA [NM_015230]	1.61104e-08	13.2961
A_24_P6517	PLEKHG1	NM_001029884	Homo sapiens pleckstrin homology domain containing, family G (with RhoGef domain) member 1 (PLEKHG1), mRNA [NM_001029884]	2.24182e-05	13.2076
A_32_P185317	LOC645249	BC033117	Homo sapiens hypothetical protein LOC641944, mRNA (cDNA clone IMAGE:3357292), partial cds. [BC033117]	2.65403e-06	13.2041
A_23_P433132	KRTCAP3	NM_173853	Homo sapiens keratinocyte associated protein 3 (KRTCAP3), mRNA [NM_173853]	1.04299e-06	13.1952
A_23_P130027	EPN3	NM_017957	Homo sapiens epsin 3 (EPN3), mRNA [NM_017957]	0.000110274	13.1523
A_23_P16523	GDF15	NM_004864	Homo sapiens growth differentiation factor 15 (GDF15), mRNA [NM_004864]	0.00356432	13.1317
A_23_P113317	PH-4	BC018731	Homo sapiens hypoxia-inducible factor prolyl 4-hydroxylase, mRNA (cDNA clone IMAGE:5017414), partial cds. [BC018731]	3.61177e-06	13.1017
A_23_P29684	VILL	NM_015873	Homo sapiens villin-like (VILL), mRNA [NM_015873]	0.00138775	12.9408
A_23_P54968	ST6GALNAC1	NM_018414	Homo sapiens ST6 (alpha-N-acetyl-neuraminyl-2,3-beta-galactosyl-1,3)-N-acetylgalactosaminide alpha-2,6-sialyltransferase 1 (ST6GALNAC1), mRNA [NM_018414]	1.08133e-05	12.9157
A_32_P147696	LOC283143	AK090602	Homo sapiens cDNA FLJ33283 fis, clone ASTRO2009177. [AK090602]	1.1523e-05	12.8451
A_23_P90032	LRRC8E	NM_025061	Homo sapiens leucine rich repeat containing 8 family, member E (LRRC8E), mRNA [NM_025061]	1.5006e-09	12.7637
A_24_P122137	LIF	NM_002309	Homo sapiens leukemia inhibitory factor (cholinergic differentiation factor) (LIF), mRNA [NM_002309]	0.00259652	12.732
A_23_P149562	ARHGAP29	BC022483	Homo sapiens Rho GTPase activating protein 29, mRNA (cDNA clone IMAGE:4795792), complete cds. [BC022483]	0.000202738	12.5907
A_23_P47642	PARVA	NM_018222	Homo sapiens parvin, alpha (PARVA), mRNA [NM_018222]	0.00018962	12.5536
A_24_P222872	UGT1A6	NM_001072	Homo sapiens UDP glucuronosyltransferase 1 family, polypeptide A6 (UGT1A6), transcript variant 1, mRNA [NM_001072]	0.000564226	12.5483
A_23_P1492	AVPI1	NM_021732	Homo sapiens arginine vasopressin-induced 1 (AVPI1), mRNA [NM_021732]	0.00117349	12.4537
A_23_P350107	TRIM56	NM_030961	Homo sapiens tripartite motif-containing 56 (TRIM56), mRNA [NM_030961]	3.96402e-05	12.4369
A_23_P87150	LPXN	NM_004811	Homo sapiens leupaxin (LPXN), mRNA [NM_004811]	0.000162187	12.4279
A_23_P200160	CFH	NM_001014975	Homo sapiens complement factor H (CFH), transcript variant 2, mRNA [NM_001014975]	3.07835e-05	12.4203
A_23_P148047	PTGER4	NM_000958	Homo sapiens prostaglandin E receptor 4 (subtype EP4) (PTGER4), mRNA [NM_000958]	0.000205472	12.3255
A_23_P161624	FOSL1	NM_005438	Homo sapiens FOS-like antigen 1 (FOSL1), mRNA [NM_005438]	7.73746e-07	12.2269
A_23_P102551	MALL	NM_005434	Homo sapiens mal, T-cell differentiation protein-like (MALL), mRNA [NM_005434]	1.13982e-05	12.2246
A_23_P58835	F2RL1	NM_005242	Homo sapiens coagulation factor II (thrombin) receptor-like 1 (F2RL1), mRNA [NM_005242]	6.28737e-08	12.2226
A_23_P748	IRF6	NM_006147	Homo sapiens interferon regulatory factor 6 (IRF6), mRNA [NM_006147]	2.10006e-06	12.1764
A_23_P87545	IFITM3	NM_021034	Homo sapiens interferon induced transmembrane protein 3 (1-8U) (IFITM3), mRNA [NM_021034]	0.00366378	12.1427
A_23_P119095	PPP1R13L	NM_006663	Homo sapiens protein phosphatase 1, regulatory (inhibitor) subunit 13 like (PPP1R13L), mRNA [NM_006663]	3.91208e-08	12.1135
A_24_P784765	CD59	NM_203330	Homo sapiens CD59 molecule, complement regulatory protein (CD59), transcript variant 1, mRNA [NM_203330]	0.000806099	12.0851
A_23_P166297	ABCG1	NM_207630	Homo sapiens ATP-binding cassette, sub-family G (WHITE), member 1 (ABCG1), transcript variant 1, mRNA [NM_207630]	3.22331e-05	12.0834
A_23_P150789	PRSS23	NM_007173	Homo sapiens protease, serine, 23 (PRSS23), mRNA [NM_007173]	8.26328e-05	12.0565
A_24_P389218	ARHGEF5	NM_005435	Homo sapiens Rho guanine nucleotide exchange factor (GEF) 5 (ARHGEF5), mRNA [NM_005435]	7.66441e-07	12.0152
A_23_P104318	DDIT4	NM_019058	Homo sapiens DNA-damage-inducible transcript 4 (DDIT4), mRNA [NM_019058]	3.77642e-15	11.9766
A_23_P216556	EPB41L4B	NM_018424	Homo sapiens erythrocyte membrane protein band 4.1 like 4B (EPB41L4B), transcript variant 1, mRNA [NM_018424]	5.06307e-05	11.9733
A_24_P305933	TMCC3	NM_020698	Homo sapiens transmembrane and coiled-coil domain family 3 (TMCC3), mRNA [NM_020698]	4.61232e-07	11.9043
A_23_P62709	SPRR3	NM_005416	Homo sapiens small proline-rich protein 3 (SPRR3), mRNA [NM_005416]	0.00314037	11.8591
A_23_P42909	TMEM139	NM_153345	Homo sapiens transmembrane protein 139 (TMEM139), mRNA [NM_153345]	1.14221e-05	11.7962
A_23_P358548	SLC43A3	NM_199329	Homo sapiens solute carrier family 43, member 3 (SLC43A3), mRNA [NM_199329]	0.000355524	11.7562
A_23_P89249	ERBB2	NM_001005862	Homo sapiens v-erb-b2 erythroblastic leukemia viral oncogene homolog 2, neuro/glioblastoma derived oncogene homolog (avian) (ERBB2), transcript variant 2, mRNA [NM_001005862]	3.87017e-06	11.7422
A_24_P355649	FLI1	NM_002017	Homo sapiens Friend leukemia virus integration 1 (FLI1), mRNA [NM_002017]	5.52324e-06	11.7227
A_23_P110879	TRAF3IP2	NM_147686	Homo sapiens TRAF3 interacting protein 2 (TRAF3IP2), transcript variant 2, mRNA [NM_147686]	2.03262e-06	11.6572
A_23_P217528	KLF8	NM_007250	Homo sapiens Kruppel-like factor 8 (KLF8), mRNA [NM_007250]	9.43188e-06	11.5974
A_23_P57856	BCL6	NM_138931	Homo sapiens B-cell CLL/lymphoma 6 (zinc finger protein 51) (BCL6), transcript variant 2, mRNA [NM_138931]	7.29328e-06	11.591
A_23_P214026	FBN2	NM_001999	Homo sapiens fibrillin 2 (congenital contractural arachnodactyly) (FBN2), mRNA [NM_001999]	0.00368599	11.4727
A_32_P63562	MIG7	DQ080207	Homo sapiens MIG7 (MIG7) mRNA, complete cds. [DQ080207]	5.12283e-06	11.4697
A_23_P41854	CARD6	NM_032587	Homo sapiens caspase recruitment domain family, member 6 (CARD6), mRNA [NM_032587]	0.00666552	11.423
A_23_P374782	SH3KBP1	NM_031892	Homo sapiens SH3-domain kinase binding protein 1 (SH3KBP1), transcript variant 1, mRNA [NM_031892]	1.15808e-07	11.3776
A_23_P201459	IFI6	NM_022873	Homo sapiens interferon, alpha-inducible protein 6 (IFI6), transcript variant 3, mRNA [NM_022873]	0.0096435	11.3271
A_24_P236003	H2AFJ	NM_018267	Homo sapiens H2A histone family, member J (H2AFJ), transcript variant 1, mRNA [NM_018267]	3.64466e-06	11.2685
A_23_P23616	PLEKHN1	NM_032129	Homo sapiens pleckstrin homology domain containing, family N member 1 (PLEKHN1), mRNA [NM_032129]	3.54547e-06	11.1974
A_24_P237511	EIF1AY	NM_004681	Homo sapiens eukaryotic translation initiation factor 1A, Y-linked (EIF1AY), mRNA [NM_004681]	1.75191e-09	11.194
A_24_P252497	TRIB1	NM_025195	Homo sapiens tribbles homolog 1 (Drosophila) (TRIB1), mRNA [NM_025195]	0.000168075	11.1895
A_23_P218442	CEACAM6	NM_002483	Homo sapiens carcinoembryonic antigen-related cell adhesion molecule 6 (non-specific cross reacting antigen) (CEACAM6), mRNA [NM_002483]	7.49644e-05	11.1375
A_24_P161018	PARP14	NM_017554	Homo sapiens poly (ADP-ribose) polymerase family, member 14 (PARP14), mRNA [NM_017554]	0.00124587	11.1235
A_23_P37497	MYO1E	U14391	Human myosin-IC mRNA, complete cds. [U14391]	1.76564e-06	11.0229
A_23_P117654	MYO5A	NM_000259	Homo sapiens myosin VA (heavy polypeptide 12, myoxin) (MYO5A), mRNA [NM_000259]	0.000108639	10.9962
A_23_P72487	XG	NM_175569	Homo sapiens Xg blood group (XG), mRNA [NM_175569]	1.53605e-07	10.9585
A_23_P77328	GCHFR	NM_005258	Homo sapiens GTP cyclohydrolase I feedback regulator (GCHFR), mRNA [NM_005258]	4.71788e-05	10.9488
A_23_P57036	CD40	NM_001250	Homo sapiens CD40 molecule, TNF receptor superfamily member 5 (CD40), transcript variant 1, mRNA [NM_001250]	2.45105e-06	10.9429
A_23_P111531	GLI3	NM_000168	Homo sapiens GLI-Kruppel family member GLI3 (Greig cephalopolysyndactyly syndrome) (GLI3), mRNA [NM_000168]	3.1732e-06	10.923
A_23_P149992	PDLIM1	NM_020992	Homo sapiens PDZ and LIM domain 1 (elfin) (PDLIM1), mRNA [NM_020992]	3.21613e-06	10.9077
A_32_P101313	PTPLAD2	NM_001010915	Homo sapiens protein tyrosine phosphatase-like A domain containing 2 (PTPLAD2), mRNA [NM_001010915]	0.00145154	10.8852
A_23_P205531	RNASE4	NM_194430	Homo sapiens ribonuclease, RNase A family, 4 (RNASE4), transcript variant 1, mRNA [NM_194430]	9.84065e-06	10.8562
A_24_P98021	MAP7	NM_003980	Homo sapiens microtubule-associated protein 7 (MAP7), mRNA [NM_003980]	6.7089e-06	10.8115
A_23_P36888	FAM113B	NM_138371	Homo sapiens family with sequence similarity 113, member B (FAM113B), mRNA [NM_138371]	4.03239e-05	10.8006
A_23_P331670	PYGB	NM_002862	Homo sapiens phosphorylase, glycogen; brain (PYGB), mRNA [NM_002862]	2.45834e-06	10.7903
A_24_P179504	WDR66	NM_144668	Homo sapiens WD repeat domain 66 (WDR66), mRNA [NM_144668]	1.62569e-05	10.7721
A_23_P166797	RTP4	NM_022147	Homo sapiens receptor transporter protein 4 (RTP4), mRNA [NM_022147]	0.00933398	10.7684
A_24_P169688	MICB	NM_005931	Homo sapiens MHC class I polypeptide-related sequence B (MICB), mRNA [NM_005931]	3.15336e-06	10.763
A_23_P45999	FBXO2	NM_012168	Homo sapiens F-box protein 2 (FBXO2), mRNA [NM_012168]	8.50435e-07	10.6987
A_23_P132910	FLJ20273	NM_019027	Homo sapiens RNA-binding protein (FLJ20273), mRNA [NM_019027]	1.06525e-07	10.6717
A_23_P255653	TNFRSF10A	NM_003844	Homo sapiens tumor necrosis factor receptor superfamily, member 10a (TNFRSF10A), mRNA [NM_003844]	3.41124e-06	10.6051
A_23_P105794	EPSTI1	NM_033255	Homo sapiens epithelial stromal interaction 1 (breast) (EPSTI1), transcript variant 2, mRNA [NM_033255]	0.000174588	10.5832
A_23_P214969	CITED2	NM_006079	Homo sapiens Cbp/p300-interacting transactivator, with Glu/Asp-rich carboxy-terminal domain, 2 (CITED2), mRNA [NM_006079]	2.04615e-05	10.5688
A_23_P399078	TIMP3	AB051444	Homo sapiens mRNA for KIAA1657 protein, partial cds. [AB051444]	8.92913e-05	10.5599
A_23_P424561	RHOV	NM_133639	Homo sapiens ras homolog gene family, member V (RHOV), mRNA [NM_133639]	0.00275424	10.5378
A_24_P196318	SLC2A9	NM_001001290	Homo sapiens solute carrier family 2 (facilitated glucose transporter), member 9 (SLC2A9), transcript variant 2, mRNA [NM_001001290]	8.64986e-10	10.5325
A_23_P167920	DLL1	NM_005618	Homo sapiens delta-like 1 (Drosophila) (DLL1), mRNA [NM_005618]	0.000514095	10.4992
A_23_P204958	LATS2	NM_014572	Homo sapiens LATS, large tumor suppressor, homolog 2 (Drosophila) (LATS2), mRNA [NM_014572]	2.16155e-08	10.4728
A_23_P350451	PRDM1	NM_001198	Homo sapiens PR domain containing 1, with ZNF domain (PRDM1), transcript variant 1, mRNA [NM_001198]	0.000242762	10.4657
A_23_P397376	MAF	AF055376	Homo sapiens short form transcription factor C-MAF (c-maf) mRNA, complete cds. [AF055376]	2.53292e-05	10.4307
A_23_P257871	DAB2	NM_001343	Homo sapiens disabled homolog 2, mitogen-responsive phosphoprotein (Drosophila) (DAB2), mRNA [NM_001343]	1.028e-07	10.4192
A_23_P372962	A2ML1	NM_144670	Homo sapiens alpha-2-macroglobulin-like 1 (A2ML1), mRNA [NM_144670]	1.85541e-07	10.414
A_24_P77904	HOXA10	NM_018951	Homo sapiens homeobox A10 (HOXA10), transcript variant 1, mRNA [NM_018951]	0.000160665	10.3911
A_23_P154217	ITGB6	NM_000888	Homo sapiens integrin, beta 6 (ITGB6), mRNA [NM_000888]	2.2736e-07	10.371
A_23_P120594	ACSS1	NM_032501	Homo sapiens acyl-CoA synthetase short-chain family member 1 (ACSS1), nuclear gene encoding mitochondrial protein, mRNA [NM_032501]	0.000223083	10.3655
A_32_P82462	LOC554202	BC021861	Homo sapiens hypothetical LOC554202, mRNA (cDNA clone MGC:30053 IMAGE:5139119), complete cds. [BC021861]	0.000339355	10.3642
A_23_P254353	NOXA1	NM_006647	Homo sapiens NADPH oxidase activator 1 (NOXA1), mRNA [NM_006647]	0.000275997	10.3549
A_23_P31453	STEAP1	NM_012449	Homo sapiens six transmembrane epithelial antigen of the prostate 1 (STEAP1), mRNA [NM_012449]	0.000235991	10.3407
A_23_P2990	CEBPE	NM_001805	Homo sapiens CCAAT/enhancer binding protein (C/EBP), epsilon (CEBPE), mRNA [NM_001805]	0.000147339	10.3136
A_23_P501822	JUP	NM_002230	Homo sapiens junction plakoglobin (JUP), transcript variant 1, mRNA [NM_002230]	1.9099e-06	10.2845
A_24_P310009	USP43	AK090821	Homo sapiens cDNA FLJ33502 fis, clone BRAMY2004492, weakly similar to UBIQUITIN CARBOXYL-TERMINAL HYDROLASE 4 (EC 3.1.2.15). [AK090821]	2.67568e-06	10.2542
A_23_P370682	BATF2	NM_138456	Homo sapiens basic leucine zipper transcription factor, ATF-like 2 (BATF2), mRNA [NM_138456]	0.00183273	10.2466
A_32_P420009	ALS2CL	NM_147129	Homo sapiens ALS2 C-terminal like (ALS2CL), transcript variant 1, mRNA [NM_147129]	1.60548e-05	10.2329
A_23_P72117	SMPDL3A	NM_006714	Homo sapiens sphingomyelin phosphodiesterase, acid-like 3A (SMPDL3A), mRNA [NM_006714]	1.0116e-07	10.2291
A_23_P103256	CFHR3	NM_021023	Homo sapiens complement factor H-related 3 (CFHR3), mRNA [NM_021023]	2.53279e-05	10.2118
A_23_P93269	ZNF165	NM_003447	Homo sapiens zinc finger protein 165 (ZNF165), mRNA [NM_003447]	1.27416e-06	10.1293
A_23_P169003	SH2D4A	NM_022071	Homo sapiens SH2 domain containing 4A (SH2D4A), mRNA [NM_022071]	2.60556e-05	10.1149
A_23_P410965	KIAA1522	NM_020888	Homo sapiens KIAA1522 (KIAA1522), mRNA [NM_020888]	3.95018e-06	10.1096
A_23_P33673	TRIM6	NM_001003818	Homo sapiens tripartite motif-containing 6 (TRIM6), transcript variant 1, mRNA [NM_001003818]	0.000106728	10.0744
A_23_P501538	HOXA3	NM_153631	Homo sapiens homeobox A3 (HOXA3), transcript variant 2, mRNA [NM_153631]	1.01559e-08	10.0675
A_23_P119390	EHD2	NM_014601	Homo sapiens EH-domain containing 2 (EHD2), mRNA [NM_014601]	3.74039e-08	10.0343
A_23_P143242	CEBPB	NM_005194	Homo sapiens CCAAT/enhancer binding protein (C/EBP), beta (CEBPB), mRNA [NM_005194]	0.000112084	9.96773
A_23_P500381	HTR7	NM_019859	Homo sapiens 5-hydroxytryptamine (serotonin) receptor 7 (adenylate cyclase-coupled) (HTR7), transcript variant d, mRNA [NM_019859]	1.11e-06	9.95496
A_23_P157333	EPHA1	NM_005232	Homo sapiens EPH receptor A1 (EPHA1), mRNA [NM_005232]	1.76704e-05	9.90285
A_23_P156445	DDX43	NM_018665	Homo sapiens DEAD (Asp-Glu-Ala-Asp) box polypeptide 43 (DDX43), mRNA [NM_018665]	1.38764e-06	9.85819
A_24_P46357	MYO10	BC108736	Homo sapiens cDNA clone MGC:131988 IMAGE:6164790, complete cds. [BC108736]	2.19056e-07	9.84142
A_23_P214821	EDN1	NM_001955	Homo sapiens endothelin 1 (EDN1), mRNA [NM_001955]	0.000139977	9.82706
A_23_P256724	TNFRSF10C	NM_003841	Homo sapiens tumor necrosis factor receptor superfamily, member 10c, decoy without an intracellular domain (TNFRSF10C), mRNA [NM_003841]	0.00211218	9.80449
A_23_P205489	SLC7A8	NM_182728	Homo sapiens solute carrier family 7 (cationic amino acid transporter, y+ system), member 8 (SLC7A8), transcript variant 2, mRNA [NM_182728]	4.45942e-05	9.74293
A_23_P82814	FBXO32	NM_058229	Homo sapiens F-box protein 32 (FBXO32), transcript variant 1, mRNA [NM_058229]	0.00226208	9.66684
A_23_P141863	ZNF544	NM_014480	Homo sapiens zinc finger protein 544 (ZNF544), mRNA [NM_014480]	1.16832e-07	9.66135
A_23_P120572	RIN2	NM_018993	Homo sapiens Ras and Rab interactor 2 (RIN2), mRNA [NM_018993]	5.43259e-06	9.65162
A_23_P142239	LOC541469	NM_001013617	Homo sapiens hypothetical LOC541469 protein (LOC541469), mRNA [NM_001013617]	0.000314836	9.64448
A_24_P379413	IL6R	NM_000565	Homo sapiens interleukin 6 receptor (IL6R), transcript variant 1, mRNA [NM_000565]	7.1513e-05	9.62347
A_23_P63896	FAS	NM_000043	Homo sapiens Fas (TNF receptor superfamily, member 6) (FAS), transcript variant 1, mRNA [NM_000043]	2.9581e-07	9.57787
A_23_P432598	CHMP4C	NM_152284	Homo sapiens chromatin modifying protein 4C (CHMP4C), mRNA [NM_152284]	5.17874e-07	9.56441
A_24_P337671	GPR115	NM_153838	Homo sapiens G protein-coupled receptor 115 (GPR115), mRNA [NM_153838]	0.000505102	9.47041
A_23_P140830	ELMO3	NM_024712	Homo sapiens engulfment and cell motility 3 (ELMO3), mRNA [NM_024712]	1.83225e-06	9.43978
A_23_P380266	FLJ23867	AK074447	Homo sapiens cDNA FLJ23867 fis, clone LNG09729. [AK074447]	4.55441e-05	9.43759
A_24_P365807	EFNB1	NM_004429	Homo sapiens ephrin-B1 (EFNB1), mRNA [NM_004429]	3.13248e-05	9.4245
A_23_P120103	KCNS3	NM_002252	Homo sapiens potassium voltage-gated channel, delayed-rectifier, subfamily S, member 3 (KCNS3), mRNA [NM_002252]	1.0744e-05	9.40759
A_23_P402952	LOC441294	NM_001008747	Homo sapiens similar to CTAGE6 (LOC441294), mRNA [NM_001008747]	0.000276161	9.38262
A_23_P353704	RP5-1022P6.2	NM_019593	Homo sapiens hypothetical protein KIAA1434 (KIAA1434), mRNA [NM_019593]	0.00949742	9.36544
A_24_P353638	SLAMF7	NM_021181	Homo sapiens SLAM family member 7 (SLAMF7), mRNA [NM_021181]	0.000162281	9.29709
A_23_P106080	RNASE7	NM_032572	Homo sapiens ribonuclease, RNase A family, 7 (RNASE7), mRNA [NM_032572]	4.79494e-05	9.28473
A_23_P49674	ARHGEF15	AK023853	Homo sapiens cDNA FLJ13791 fis, clone THYRO1000070. [AK023853]	5.82085e-07	9.24255
A_23_P169039	SNAI2	NM_003068	Homo sapiens snail homolog 2 (Drosophila) (SNAI2), mRNA [NM_003068]	2.49718e-05	9.18222
A_23_P5301	TFCP2L1	NM_014553	Homo sapiens transcription factor CP2-like 1 (TFCP2L1), mRNA [NM_014553]	5.25512e-06	9.16757
A_23_P143845	TIPARP	NM_015508	Homo sapiens TCDD-inducible poly(ADP-ribose) polymerase (TIPARP), mRNA [NM_015508]	1.04785e-07	9.15326
A_23_P209408	CASP10	NM_032977	Homo sapiens caspase 10, apoptosis-related cysteine peptidase (CASP10), transcript variant D, mRNA [NM_032977]	3.78528e-07	9.11297
A_32_P9753	TMEM49	NM_030938	Homo sapiens transmembrane protein 49 (TMEM49), mRNA [NM_030938]	9.35024e-05	9.08678
A_23_P128919	LGALS3	NM_002306	Homo sapiens lectin, galactoside-binding, soluble, 3 (galectin 3) (LGALS3), mRNA [NM_002306]	1.836e-07	9.06196
A_23_P134835	ChGn	NM_018371	Homo sapiens chondroitin beta1,4 N-acetylgalactosaminyltransferase (ChGn), mRNA [NM_018371]	0.00517983	9.05125
A_24_P235248	PTPRZ1	NM_002851	Homo sapiens protein tyrosine phosphatase, receptor-type, Z polypeptide 1 (PTPRZ1), mRNA [NM_002851]	1.7487e-08	9.03536
A_23_P253982	HOXA4	NM_002141	Homo sapiens homeobox A4 (HOXA4), mRNA [NM_002141]	1.29464e-06	8.99418
A_23_P19663	CTGF	NM_001901	Homo sapiens connective tissue growth factor (CTGF), mRNA [NM_001901]	7.12419e-06	8.92696
A_23_P126593	S100A11	NM_005620	Homo sapiens S100 calcium binding protein A11 (calgizzarin) (S100A11), mRNA [NM_005620]	1.73153e-05	8.88176
A_23_P107465	KRT31	NM_002277	Homo sapiens keratin, hair, acidic, 1 (KRTHA1), mRNA [NM_002277]	1.28408e-05	8.87882
A_23_P132644	AADACL1	NM_020792	Homo sapiens arylacetamide deacetylase-like 1 (AADACL1), mRNA [NM_020792]	0.00019208	8.8706
A_23_P163467	FLJ43339	NM_207380	Homo sapiens FLJ43339 protein (FLJ43339), mRNA [NM_207380]	0.00224412	8.86965
A_23_P115862	COMTD1	NM_144589	Homo sapiens catechol-O-methyltransferase domain containing 1 (COMTD1), mRNA [NM_144589]	1.63493e-07	8.85137
A_23_P88439	MTAC2D1	NM_152332	Homo sapiens membrane targeting (tandem) C2 domain containing 1 (MTAC2D1), mRNA [NM_152332]	6.21994e-06	8.79666
A_24_P145629	SERINC2	NM_178865	Homo sapiens serine incorporator 2 (SERINC2), mRNA [NM_178865]	4.0157e-05	8.70726
A_23_P348936	CTAGEP	BC036527	Homo sapiens CTAGE family pseudogene, mRNA (cDNA clone MGC:33437 IMAGE:5270059), complete cds. [BC036527]	0.000319166	8.65515
A_23_P218555	FOSL2	NM_005253	Homo sapiens FOS-like antigen 2 (FOSL2), mRNA [NM_005253]	3.54867e-06	8.65472
A_23_P154235	NMI	NM_004688	Homo sapiens N-myc (and STAT) interactor (NMI), mRNA [NM_004688]	3.32465e-05	8.65245
A_23_P35082	SESN2	NM_031459	Homo sapiens sestrin 2 (SESN2), mRNA [NM_031459]	0.00314559	8.64861
A_23_P107963	FUT1	NM_000148	Homo sapiens fucosyltransferase 1 (galactoside 2-alpha-L-fucosyltransferase, H blood group) (FUT1), mRNA [NM_000148]	1.59074e-05	8.62403
A_23_P74928	MR1	NM_001531	Homo sapiens major histocompatibility complex, class I-related (MR1), mRNA [NM_001531]	2.19864e-05	8.60614
A_23_P49448	FA2H	NM_024306	Homo sapiens fatty acid 2-hydroxylase (FA2H), mRNA [NM_024306]	0.000660263	8.59525
A_23_P19030	ARSI	BC111002	Homo sapiens arylsulfatase family, member I, mRNA (cDNA clone IMAGE:5750037). [BC111002]	0.000998872	8.58151
A_23_P359091	SMAD3	NM_005902	Homo sapiens SMAD, mothers against DPP homolog 3 (Drosophila) (SMAD3), mRNA [NM_005902]	0.000544181	8.54868
A_24_P759477	ITGB8	NM_002214	Homo sapiens integrin, beta 8 (ITGB8), mRNA [NM_002214]	0.00141017	8.481
A_23_P1461	OPTN	NM_001008211	Homo sapiens optineurin (OPTN), transcript variant 1, mRNA [NM_001008211]	3.56737e-07	8.40869
A_23_P75811	SLC3A2	NM_002394	Homo sapiens solute carrier family 3 (activators of dibasic and neutral amino acid transport), member 2 (SLC3A2), transcript variant 3, mRNA [NM_002394]	0.000104904	8.40422
A_23_P11800	CAMK2N1	AF116637	Homo sapiens PRO1489 mRNA, complete cds. [AF116637]	0.000256132	8.40232
A_23_P372946	TM4SF19	NM_138461	Homo sapiens transmembrane 4 L six family member 19 (TM4SF19), mRNA [NM_138461]	0.000386965	8.39281
A_23_P48676	PYGL	NM_002863	Homo sapiens phosphorylase, glycogen; liver (Hers disease, glycogen storage disease type VI) (PYGL), mRNA [NM_002863]	1.12368e-05	8.37941
A_23_P57950	RHO	NM_000539	Homo sapiens rhodopsin (opsin 2, rod pigment) (retinitis pigmentosa 4, autosomal dominant) (RHO), mRNA [NM_000539]	2.22021e-05	8.37355
A_24_P943017	LASS3	NM_178842	Homo sapiens LAG1 longevity assurance homolog 3 (S. cerevisiae) (LASS3), mRNA [NM_178842]	0.00389118	8.34812
A_24_P339436	GNAL	NM_002071	Homo sapiens guanine nucleotide binding protein (G protein), alpha activating activity polypeptide, olfactory type (GNAL), transcript variant 2, mRNA [NM_002071]	2.1092e-07	8.3138
A_23_P136493	NRG1	NM_013962	Homo sapiens neuregulin 1 (NRG1), transcript variant GGF2, mRNA [NM_013962]	0.00578269	8.27283
A_23_P29697	ENTPD3	NM_001248	Homo sapiens ectonucleoside triphosphate diphosphohydrolase 3 (ENTPD3), mRNA [NM_001248]	7.34522e-06	8.25386
A_23_P156826	C6orf105	NM_032744	Homo sapiens chromosome 6 open reading frame 105 (C6orf105), mRNA [NM_032744]	0.00133189	8.23538
A_23_P23221	GADD45A	NM_001924	Homo sapiens growth arrest and DNA-damage-inducible, alpha (GADD45A), mRNA [NM_001924]	0.000316586	8.16732
A_23_P76364	CD9	NM_001769	Homo sapiens CD9 molecule (CD9), mRNA [NM_001769]	9.80745e-07	8.13731
A_23_P203972	FZD10	NM_007197	Homo sapiens frizzled homolog 10 (Drosophila) (FZD10), mRNA [NM_007197]	0.00205962	8.13231
A_23_P92334	TMEM156	NM_024943	Homo sapiens transmembrane protein 156 (TMEM156), mRNA [NM_024943]	1.16241e-05	8.12421
A_23_P71570	OSR2	NM_053001	Homo sapiens odd-skipped related 2 (Drosophila) (OSR2), mRNA [NM_053001]	3.01796e-06	8.09132
A_23_P40847	CHST2	NM_004267	Homo sapiens carbohydrate (N-acetylglucosamine-6-O) sulfotransferase 2 (CHST2), mRNA [NM_004267]	8.53051e-07	8.07252
A_23_P38505	CXCL16	NM_022059	Homo sapiens chemokine (C-X-C motif) ligand 16 (CXCL16), mRNA [NM_022059]	2.27498e-07	8.0724
A_23_P255884	GSN	NM_198252	Homo sapiens gelsolin (amyloidosis, Finnish type) (GSN), transcript variant 2, mRNA [NM_198252]	7.62063e-05	8.05919
A_23_P69179	LEPREL1	NM_018192	Homo sapiens leprecan-like 1 (LEPREL1), mRNA [NM_018192]	0.000318204	8.05901
A_24_P280846	GOLT1A	NM_198447	Homo sapiens golgi transport 1 homolog A (S. cerevisiae) (GOLT1A), mRNA [NM_198447]	0.00251355	8.04214
A_23_P96369	CXorf57	NM_018015	Homo sapiens chromosome X open reading frame 57 (CXorf57), mRNA [NM_018015]	6.16596e-06	8.03115
A_23_P149626	PLEKHG5	NM_198681	Homo sapiens pleckstrin homology domain containing, family G (with RhoGef domain) member 5 (PLEKHG5), transcript variant 2, mRNA [NM_198681]	1.18973e-06	7.94829
A_23_P250629	PSMB8	NM_004159	Homo sapiens proteasome (prosome, macropain) subunit, beta type, 8 (large multifunctional peptidase 7) (PSMB8), transcript variant 1, mRNA [NM_004159]	0.000939249	7.89842
A_24_P271285	BTBD14B	NM_052876	Homo sapiens BTB (POZ) domain containing 14B (BTBD14B), mRNA [NM_052876]	1.0276e-06	7.89621
A_23_P47077	BAG3	NM_004281	Homo sapiens BCL2-associated athanogene 3 (BAG3), mRNA [NM_004281]	1.17139e-07	7.88407
A_23_P151307	RAPGEF3	NM_006105	Homo sapiens Rap guanine nucleotide exchange factor (GEF) 3 (RAPGEF3), mRNA [NM_006105]	7.99072e-05	7.87023
A_32_P148345	ANXA2	NM_001002857	Homo sapiens annexin A2 (ANXA2), transcript variant 2, mRNA [NM_001002857]	2.28367e-05	7.81764
A_24_P335305	OAS3	NM_006187	Homo sapiens 2'-5'-oligoadenylate synthetase 3, 100kDa (OAS3), mRNA [NM_006187]	0.00873353	7.81331
A_24_P46159	SCOTIN	NM_016479	Homo sapiens scotin (SCOTIN), mRNA [NM_016479]	2.36608e-08	7.81045
A_24_P340036	RNF128	NM_194463	Homo sapiens ring finger protein 128 (RNF128), transcript variant 1, mRNA [NM_194463]	2.00766e-06	7.77785
A_23_P110052	FOXL2	NM_023067	Homo sapiens forkhead box L2 (FOXL2), mRNA [NM_023067]	5.49735e-08	7.77029
A_23_P95165	SEMA4B	NM_020210	Homo sapiens sema domain, immunoglobulin domain (Ig), transmembrane domain (TM) and short cytoplasmic domain, (semaphorin) 4B (SEMA4B), transcript variant 1, mRNA [NM_020210]	4.51416e-05	7.76995
A_24_P305223	CTAGE1	NM_172241	Homo sapiens cutaneous T-cell lymphoma-associated antigen 1 (CTAGE1), transcript variant 1, mRNA [NM_172241]	0.000608899	7.76677
A_23_P256107	HPSE	NM_006665	Homo sapiens heparanase (HPSE), mRNA [NM_006665]	0.00282375	7.71194
A_23_P51487	GBP3	NM_018284	Homo sapiens guanylate binding protein 3 (GBP3), mRNA [NM_018284]	7.62868e-06	7.70459
A_23_P95917	HLA-C	CR598918	full-length cDNA clone CS0DE006YG20 of Placenta of Homo sapiens (human). [CR598918]	5.09665e-06	7.67233
A_23_P39237	ZFP36	NM_003407	Homo sapiens zinc finger protein 36, C3H type, homolog (mouse) (ZFP36), mRNA [NM_003407]	0.000743395	7.62833
A_23_P168470	BAIAP2L1	NM_018842	Homo sapiens BAI1-associated protein 2-like 1 (BAIAP2L1), mRNA [NM_018842]	2.7886e-05	7.6133
A_23_P54840	MT1A	NM_005946	Homo sapiens metallothionein 1A (functional) (MT1A), mRNA [NM_005946]	0.00535668	7.59454
A_23_P132019	ITCH	NM_031483	Homo sapiens itchy homolog E3 ubiquitin protein ligase (mouse) (ITCH), mRNA [NM_031483]	0.00102105	7.58716
A_23_P168836	PTK2B	NM_173174	Homo sapiens PTK2B protein tyrosine kinase 2 beta (PTK2B), transcript variant 1, mRNA [NM_173174]	6.49711e-08	7.58689
A_24_P89457	CDKN1A	NM_078467	Homo sapiens cyclin-dependent kinase inhibitor 1A (p21, Cip1) (CDKN1A), transcript variant 2, mRNA [NM_078467]	9.28994e-05	7.57468
A_23_P48550	KIAA0284	NM_015005	Homo sapiens KIAA0284 (KIAA0284), mRNA [NM_015005]	5.02078e-06	7.51989
A_23_P4899	NTF5	NM_006179	Homo sapiens neurotrophin 5 (neurotrophin 4/5) (NTF5), mRNA [NM_006179]	6.05229e-07	7.507
A_23_P407614	PYDC1	NM_152901	Homo sapiens PYD (pyrin domain) containing 1 (PYDC1), mRNA [NM_152901]	4.33159e-06	7.4984
A_23_P325690	ANKRD35	NM_144698	Homo sapiens ankyrin repeat domain 35 (ANKRD35), mRNA [NM_144698]	0.000307142	7.49834
A_23_P66682	HOXB6	NM_018952	Homo sapiens homeobox B6 (HOXB6), mRNA [NM_018952]	0.000159329	7.49752
A_23_P112103	GSDMDC1	NM_024736	Homo sapiens gasdermin domain containing 1 (GSDMDC1), mRNA [NM_024736]	6.30237e-07	7.49664
A_24_P56833	HSD17B1	NM_000413	Homo sapiens hydroxysteroid (17-beta) dehydrogenase 1 (HSD17B1), mRNA [NM_000413]	1.00408e-06	7.45207
A_23_P106024	JAG2	NM_002226	Homo sapiens jagged 2 (JAG2), transcript variant 1, mRNA [NM_002226]	0.00115649	7.45198
A_24_P123601	DDR1	NM_013994	Homo sapiens discoidin domain receptor family, member 1 (DDR1), transcript variant 3, mRNA [NM_013994]	4.40225e-06	7.44432
A_24_P96961	SPSB1	NM_025106	Homo sapiens splA/ryanodine receptor domain and SOCS box containing 1 (SPSB1), mRNA [NM_025106]	0.000303052	7.44253
A_23_P257924	ETS2	NM_005239	Homo sapiens v-ets erythroblastosis virus E26 oncogene homolog 2 (avian) (ETS2), mRNA [NM_005239]	0.00013042	7.42816
A_23_P167182	LRAT	NM_004744	Homo sapiens lecithin retinol acyltransferase (phosphatidylcholine--retinol O-acyltransferase) (LRAT), mRNA [NM_004744]	0.00340653	7.38753
A_23_P9135	CNTNAP3	NM_033655	Homo sapiens contactin associated protein-like 3 (CNTNAP3), mRNA [NM_033655]	1.24683e-05	7.37235
A_24_P251764	CXCL3	NM_002090	Homo sapiens chemokine (C-X-C motif) ligand 3 (CXCL3), mRNA [NM_002090]	0.00284502	7.36313
A_23_P166453	CDC42EP1	NM_007061	Homo sapiens CDC42 effector protein (Rho GTPase binding) 1 (CDC42EP1), transcript variant 2, mRNA [NM_007061]	1.65889e-05	7.35186
A_24_P371399	C3orf58	NM_173552	Homo sapiens chromosome 3 open reading frame 58 (C3orf58), mRNA [NM_173552]	2.58641e-06	7.34227
A_23_P45294	CXorf39	NM_207318	Homo sapiens chromosome X open reading frame 39 (CXorf39), mRNA [NM_207318]	3.51799e-07	7.3335
A_23_P212089	NFKBIZ	NM_031419	Homo sapiens nuclear factor of kappa light polypeptide gene enhancer in B-cells inhibitor, zeta (NFKBIZ), transcript variant 1, mRNA [NM_031419]	1.20166e-06	7.31395
A_23_P39056	KLK7	NM_005046	Homo sapiens kallikrein 7 (chymotryptic, stratum corneum) (KLK7), transcript variant 1, mRNA [NM_005046]	0.00808854	7.30824
A_23_P88819	MVP	NM_017458	Homo sapiens major vault protein (MVP), transcript variant 1, mRNA [NM_017458]	8.81989e-08	7.30555
A_23_P369634	C8orf73	AF289596	Homo sapiens clone pp7882 unknown mRNA. [AF289596]	2.42333e-05	7.30114
A_23_P9232	GCNT1	NM_001490	Homo sapiens glucosaminyl (N-acetyl) transferase 1, core 2 (beta-1,6-N-acetylglucosaminyltransferase) (GCNT1), mRNA [NM_001490]	1.82228e-05	7.2953
A_23_P571	SLC2A1	NM_006516	Homo sapiens solute carrier family 2 (facilitated glucose transporter), member 1 (SLC2A1), mRNA [NM_006516]	4.70694e-06	7.26099
A_23_P381979	OGT	NM_181672	Homo sapiens O-linked N-acetylglucosamine (GlcNAc) transferase (UDP-N-acetylglucosamine:polypeptide-N-acetylglucosaminyl transferase) (OGT), transcript variant 1, mRNA [NM_181672]	0.00103144	7.24456
A_23_P36831	GPRC5A	NM_003979	Homo sapiens G protein-coupled receptor, family C, group 5, member A (GPRC5A), mRNA [NM_003979]	3.13577e-06	7.19598
A_32_P70315	TIMP4	NM_003256	Homo sapiens TIMP metallopeptidase inhibitor 4 (TIMP4), mRNA [NM_003256]	0.00104971	7.19027
A_24_P303354	HIST1H2AG	NM_021064	Homo sapiens histone 1, H2ag (HIST1H2AG), mRNA [NM_021064]	1.42147e-05	7.17736
A_23_P19517	ITPR3	NM_002224	Homo sapiens inositol 1,4,5-triphosphate receptor, type 3 (ITPR3), mRNA [NM_002224]	1.02218e-09	7.12787
A_23_P305060	PBEF1	NM_005746	Homo sapiens pre-B-cell colony enhancing factor 1 (PBEF1), transcript variant 1, mRNA [NM_005746]	1.20249e-05	7.12446
A_24_P323114	ANXA2P3	NR_001446	Homo sapiens annexin A2 pseudogene 3 (ANXA2P3) on chromosome 10 [NR_001446]	2.77435e-08	7.05933
A_32_P222695	FLJ41603	NM_001001669	Homo sapiens FLJ41603 protein (FLJ41603), mRNA [NM_001001669]	0.000590991	7.03529
A_23_P69383	PARP9	NM_031458	Homo sapiens poly (ADP-ribose) polymerase family, member 9 (PARP9), mRNA [NM_031458]	0.00563043	7.0278
A_23_P76690	UCHL3	NM_006002	Homo sapiens ubiquitin carboxyl-terminal esterase L3 (ubiquitin thiolesterase) (UCHL3), mRNA [NM_006002]	0.000105724	6.93643
A_23_P62959	PHLDA3	NM_012396	Homo sapiens pleckstrin homology-like domain, family A, member 3 (PHLDA3), mRNA [NM_012396]	4.64831e-05	6.91697
A_23_P152428	MARVELD3	NM_052858	Homo sapiens MARVEL domain containing 3 (MARVELD3), transcript variant 2, mRNA [NM_052858]	4.25152e-07	6.91457
A_23_P208119	PSTPIP2	NM_024430	Homo sapiens proline-serine-threonine phosphatase interacting protein 2 (PSTPIP2), mRNA [NM_024430]	0.00160852	6.90431
A_23_P142294	ETHE1	NM_014297	Homo sapiens ethylmalonic encephalopathy 1 (ETHE1), mRNA [NM_014297]	6.34251e-07	6.90114
A_23_P341223	KLHL21	NM_014851	Homo sapiens kelch-like 21 (Drosophila) (KLHL21), mRNA [NM_014851]	9.63631e-08	6.87961
A_23_P342654	PALM2-AKAP2	NM_147150	Homo sapiens PALM2-AKAP2 protein (PALM2-AKAP2), transcript variant 2, mRNA [NM_147150]	4.12699e-05	6.85365
A_23_P143068	IQCA	NM_024726	Homo sapiens IQ motif containing with AAA domain (IQCA), mRNA [NM_024726]	0.00762396	6.8498
A_23_P146946	CST6	NM_001323	Homo sapiens cystatin E/M (CST6), mRNA [NM_001323]	7.88153e-06	6.80738
A_23_P162466	PKP2	NM_004572	Homo sapiens plakophilin 2 (PKP2), transcript variant 2b, mRNA [NM_004572]	1.97106e-07	6.80116
A_23_P137984	S100A10	AK125884	Homo sapiens cDNA FLJ43896 fis, clone TESTI4009752. [AK125884]	3.56921e-07	6.79146
A_23_P360215	POLD4	NM_021173	Homo sapiens polymerase (DNA-directed), delta 4 (POLD4), mRNA [NM_021173]	0.000243653	6.79106
A_23_P120488	NPEPL1	NM_024663	Homo sapiens aminopeptidase-like 1 (NPEPL1), mRNA [NM_024663]	8.1562e-08	6.779
A_23_P388900	SLC22A15	NM_018420	Homo sapiens solute carrier family 22 (organic cation transporter), member 15 (SLC22A15), mRNA [NM_018420]	4.30079e-05	6.77223
A_23_P60120	MLZE	NM_031415	Homo sapiens melanoma-derived leucine zipper, extra-nuclear factor (MLZE), mRNA [NM_031415]	0.00464806	6.76871
A_24_P46689	SASH1	NM_015278	Homo sapiens SAM and SH3 domain containing 1 (SASH1), mRNA [NM_015278]	9.2249e-06	6.76236
A_23_P12405	ESPN	NM_031475	Homo sapiens espin (ESPN), mRNA [NM_031475]	0.000112611	6.76043
A_23_P62607	IL22RA1	NM_021258	Homo sapiens interleukin 22 receptor, alpha 1 (IL22RA1), mRNA [NM_021258]	0.00841633	6.75941
A_23_P83931	NET1	NM_005863	Homo sapiens neuroepithelial cell transforming gene 1 (NET1), mRNA [NM_005863]	6.08578e-05	6.73875
A_23_P11025	ZNF185	NM_007150	Homo sapiens zinc finger protein 185 (LIM domain) (ZNF185), mRNA [NM_007150]	0.00322563	6.73489
A_24_P391625	KRT6L	NM_175834	Homo sapiens keratin 6L (KRT6L), mRNA [NM_175834]	0.00422995	6.66075
A_23_P369447	KGFLP1	NM_174950	Homo sapiens keratinocyte growth factor-like protein 1 (KGFLP1), mRNA [NM_174950]	0.00233487	6.65246
A_23_P217109	SLC31A2	NM_001860	Homo sapiens solute carrier family 31 (copper transporters), member 2 (SLC31A2), mRNA [NM_001860]	8.22852e-05	6.64404
A_23_P127663	PRRG4	NM_024081	Homo sapiens proline rich Gla (G-carboxyglutamic acid) 4 (transmembrane) (PRRG4), mRNA [NM_024081]	2.7847e-07	6.62326
A_24_P229531	OBFC2A	NM_001031716	Homo sapiens oligonucleotide/oligosaccharide-binding fold containing 2A (OBFC2A), mRNA [NM_001031716]	0.00047777	6.61243
A_23_P132378	CELSR1	NM_014246	Homo sapiens cadherin, EGF LAG seven-pass G-type receptor 1 (flamingo homolog, Drosophila) (CELSR1), mRNA [NM_014246]	7.26694e-05	6.61137
A_24_P45367	NPAL3	NM_020448	Homo sapiens NIPA-like domain containing 3 (NPAL3), mRNA [NM_020448]	0.000413671	6.61047
A_23_P500271	IRF5	NM_002200	Homo sapiens interferon regulatory factor 5 (IRF5), transcript variant 1, mRNA [NM_002200]	5.79896e-06	6.59984
A_23_P33326	ADRA1B	NM_000679	Homo sapiens adrenergic, alpha-1B-, receptor (ADRA1B), mRNA [NM_000679]	7.46217e-05	6.59938
A_24_P942945	GPR126	NM_020455	Homo sapiens G protein-coupled receptor 126 (GPR126), transcript variant a1, mRNA [NM_020455]	8.82176e-06	6.55077
A_23_P106922	CHST6	NM_021615	Homo sapiens carbohydrate (N-acetylglucosamine 6-O) sulfotransferase 6 (CHST6), mRNA [NM_021615]	0.000807605	6.5293
A_23_P131060	CYP4F8	NM_007253	Homo sapiens cytochrome P450, family 4, subfamily F, polypeptide 8 (CYP4F8), mRNA [NM_007253]	0.000161153	6.49097
A_23_P21324	TWIST2	NM_057179	Homo sapiens twist homolog 2 (Drosophila) (TWIST2), mRNA [NM_057179]	1.08558e-05	6.48964
A_23_P349416	ERBB3	U88360	Homo sapiens clone R35 ErbB-3 R35 (c-erbB-3) mRNA, partial cds. [U88360]	2.88343e-06	6.48792
A_24_P47681	CAND1	NM_018448	Homo sapiens cullin-associated and neddylation-dissociated 1 (CAND1), mRNA [NM_018448]	7.29393e-05	6.46124
A_23_P68031	STAT4	NM_003151	Homo sapiens signal transducer and activator of transcription 4 (STAT4), mRNA [NM_003151]	2.34281e-05	6.43248
A_23_P28772	DBNDD2	NM_018478	Homo sapiens dysbindin (dystrobrevin binding protein 1) domain containing 2 (DBNDD2), transcript variant 1, mRNA [NM_018478]	6.67491e-08	6.41117
A_24_P71373	SLC9A1	NM_003047	Homo sapiens solute carrier family 9 (sodium/hydrogen exchanger), member 1 (antiporter, Na+/H+, amiloride sensitive) (SLC9A1), mRNA [NM_003047]	1.60879e-05	6.41028
A_32_P42946	C1orf210	NM_182517	Homo sapiens chromosome 1 open reading frame 210 (C1orf210), mRNA [NM_182517]	0.000132122	6.37789
A_23_P26697	TRIM47	NM_033452	Homo sapiens tripartite motif-containing 47 (TRIM47), mRNA [NM_033452]	0.000368249	6.36894
A_23_P7402	PDZD2	NM_178140	Homo sapiens PDZ domain containing 2 (PDZD2), mRNA [NM_178140]	0.000276848	6.36146
A_23_P209298	EPB41L5	NM_020909	Homo sapiens erythrocyte membrane protein band 4.1 like 5 (EPB41L5), mRNA [NM_020909]	0.00381852	6.36021
A_23_P19333	TREM1	NM_018643	Homo sapiens triggering receptor expressed on myeloid cells 1 (TREM1), mRNA [NM_018643]	0.00158822	6.35124
A_24_P192805	INCA	NM_001007232	Homo sapiens inhibitory caspase recruitment domain (CARD) protein (INCA), mRNA [NM_001007232]	1.17263e-05	6.34395
A_24_P159227	PAK6	NM_020168	Homo sapiens p21(CDKN1A)-activated kinase 6 (PAK6), mRNA [NM_020168]	0.00012262	6.30712
A_24_P921446	EMP1	BC017854	Homo sapiens epithelial membrane protein 1, mRNA (cDNA clone IMAGE:4691099), partial cds. [BC017854]	6.96494e-06	6.29768
A_23_P213050	HPGD	NM_000860	Homo sapiens hydroxyprostaglandin dehydrogenase 15-(NAD) (HPGD), mRNA [NM_000860]	0.0032406	6.28865
A_24_P225679	IRS1	NM_005544	Homo sapiens insulin receptor substrate 1 (IRS1), mRNA [NM_005544]	0.000134812	6.26853
A_23_P14559	RIPK3	NM_006871	Homo sapiens receptor-interacting serine-threonine kinase 3 (RIPK3), mRNA [NM_006871]	1.4214e-05	6.25982
A_24_P117902	OSBPL10	NM_017784	Homo sapiens oxysterol binding protein-like 10 (OSBPL10), mRNA [NM_017784]	1.55835e-05	6.25346
A_23_P114084	PHEX	NM_000444	Homo sapiens phosphate regulating endopeptidase homolog, X-linked (hypophosphatemia, vitamin D resistant rickets) (PHEX), transcript variant 1843529, mRNA [NM_000444]	0.00223932	6.23394
A_24_P208567	IL18R1	NM_003855	Homo sapiens interleukin 18 receptor 1 (IL18R1), mRNA [NM_003855]	0.00150985	6.2325
A_24_P56240	CPNE8	NM_153634	Homo sapiens copine VIII (CPNE8), mRNA [NM_153634]	4.1209e-07	6.20392
A_23_P348257	NUAK1	NM_014840	Homo sapiens NUAK family, SNF1-like kinase, 1 (NUAK1), mRNA [NM_014840]	0.000307403	6.18344
A_23_P428738	ANG	NM_001145	Homo sapiens angiogenin, ribonuclease, RNase A family, 5 (ANG), mRNA [NM_001145]	2.97074e-06	6.17197
A_24_P734060	LOC284454	BX640708	Homo sapiens mRNA; cDNA DKFZp686K181 (from clone DKFZp686K181). [BX640708]	0.000136806	6.16584
A_23_P162486	PTPN6	NM_002831	Homo sapiens protein tyrosine phosphatase, non-receptor type 6 (PTPN6), transcript variant 1, mRNA [NM_002831]	5.97341e-06	6.15682
A_24_P105747	AP1S3	NM_001039569	Homo sapiens adaptor-related protein complex 1, sigma 3 subunit (AP1S3), mRNA [NM_001039569]	2.9705e-07	6.14367
A_23_P60387	NOTCH1	NM_017617	Homo sapiens Notch homolog 1, translocation-associated (Drosophila) (NOTCH1), mRNA [NM_017617]	2.21402e-07	6.11132
A_24_P376483	HLA-A	NM_002116	Homo sapiens major histocompatibility complex, class I, A (HLA-A), mRNA [NM_002116]	9.67357e-05	6.11022
A_32_P47754	SLC2A14	BC060766	Homo sapiens solute carrier family 2 (facilitated glucose transporter), member 14, mRNA (cDNA clone MGC:71510 IMAGE:5297510), complete cds. [BC060766]	0.000267946	6.10705
A_24_P125273	ARL4D	NM_001661	Homo sapiens ADP-ribosylation factor-like 4D (ARL4D), mRNA [NM_001661]	9.10256e-05	6.08736
A_23_P371824	TUFT1	NM_020127	Homo sapiens tuftelin 1 (TUFT1), mRNA [NM_020127]	0.00251149	6.06847
A_32_P157965	EIF2S2	NM_003908	Homo sapiens eukaryotic translation initiation factor 2, subunit 2 beta, 38kDa (EIF2S2), mRNA [NM_003908]	0.000630436	6.06439
A_23_P52161	C11orf17	NM_020642	Homo sapiens chromosome 11 open reading frame 17 (C11orf17), transcript variant 2, mRNA [NM_020642]	5.92241e-05	6.04468
A_23_P389281	HOXA13	NM_000522	Homo sapiens homeobox A13 (HOXA13), mRNA [NM_000522]	0.00013986	6.03454
A_23_P56422	LRRFIP1	NM_004735	Homo sapiens leucine rich repeat (in FLII) interacting protein 1 (LRRFIP1), mRNA [NM_004735]	0.00453883	6.01514
A_23_P61050	MLKL	NM_152649	Homo sapiens mixed lineage kinase domain-like (MLKL), mRNA [NM_152649]	0.00260106	6.0103
A_23_P50919	SERPINE2	NM_006216	Homo sapiens serpin peptidase inhibitor, clade E (nexin, plasminogen activator inhibitor type 1), member 2 (SERPINE2), mRNA [NM_006216]	5.04223e-06	5.99115
A_23_P114172	TBC1D8B	NM_017752	Homo sapiens FLJ20298 protein (FLJ20298), transcript variant 1, mRNA [NM_017752]	4.07495e-06	5.98382
A_24_P23034	ZNFX1	NM_021035	Homo sapiens zinc finger, NFX1-type containing 1 (ZNFX1), mRNA [NM_021035]	0.000134501	5.98002
A_23_P140434	MYO5C	NM_018728	Homo sapiens myosin VC (MYO5C), mRNA [NM_018728]	6.6805e-06	5.93911
A_23_P120472	TFAP2C	NM_003222	Homo sapiens transcription factor AP-2 gamma (activating enhancer binding protein 2 gamma) (TFAP2C), mRNA [NM_003222]	7.97768e-06	5.92184
A_23_P150018	DUSP5	NM_004419	Homo sapiens dual specificity phosphatase 5 (DUSP5), mRNA [NM_004419]	0.00187999	5.91581
A_24_P392774	HSD17B12	NM_016142	Homo sapiens hydroxysteroid (17-beta) dehydrogenase 12 (HSD17B12), mRNA [NM_016142]	0.000374002	5.90266
A_23_P130619	STXBP2	NM_006949	Homo sapiens syntaxin binding protein 2 (STXBP2), mRNA [NM_006949]	0.000137453	5.89935
A_23_P29922	TLR3	NM_003265	Homo sapiens toll-like receptor 3 (TLR3), mRNA [NM_003265]	0.000164071	5.88524
A_24_P66780	FAM83B	NM_001010872	Homo sapiens family with sequence similarity 83, member B (FAM83B), mRNA [NM_001010872]	0.00121252	5.88418
A_23_P303671	ECM2	BC036806	Homo sapiens extracellular matrix protein 2, female organ and adipocyte specific, mRNA (cDNA clone IMAGE:5725929), partial cds. [BC036806]	0.00639186	5.87318
A_23_P2041	MICALCL	NM_032867	Homo sapiens MICAL C-terminal like (MICALCL), mRNA [NM_032867]	5.04773e-06	5.86643
A_23_P133902	PSORS1C1	NM_014068	Homo sapiens psoriasis susceptibility 1 candidate 1 (PSORS1C1), mRNA [NM_014068]	0.000119153	5.85874
A_23_P101374	CYP2S1	NM_030622	Homo sapiens cytochrome P450, family 2, subfamily S, polypeptide 1 (CYP2S1), mRNA [NM_030622]	0.000278881	5.85071
A_23_P127584	NNMT	NM_006169	Homo sapiens nicotinamide N-methyltransferase (NNMT), mRNA [NM_006169]	0.00825055	5.84641
A_23_P217447	LAMP2	NM_013995	Homo sapiens lysosomal-associated membrane protein 2 (LAMP2), transcript variant LAMP2B, mRNA [NM_013995]	1.79115e-07	5.8172
A_23_P434890	CARD10	NM_014550	Homo sapiens caspase recruitment domain family, member 10 (CARD10), mRNA [NM_014550]	0.00762197	5.81496
A_23_P207905	SECTM1	NM_003004	Homo sapiens secreted and transmembrane 1 (SECTM1), mRNA [NM_003004]	0.000109891	5.80624
A_24_P186030	PRKY	NM_002760	Homo sapiens protein kinase, Y-linked (PRKY), mRNA [NM_002760]	7.29135e-05	5.80125
A_23_P52556	CTSD	NM_001909	Homo sapiens cathepsin D (lysosomal aspartyl peptidase) (CTSD), mRNA [NM_001909]	2.57042e-05	5.80073
A_23_P389250	LOC341346	XM_292021	PREDICTED: Homo sapiens hypothetical LOC341346 (LOC341346), mRNA [XM_292021]	4.19778e-05	5.79001
A_23_P11032	SLC9A7	NM_032591	Homo sapiens solute carrier family 9 (sodium/hydrogen exchanger), member 7 (SLC9A7), mRNA [NM_032591]	1.16973e-06	5.77991
A_23_P214059	NR3C1	NM_000176	Homo sapiens nuclear receptor subfamily 3, group C, member 1 (glucocorticoid receptor) (NR3C1), transcript variant 5, mRNA [NM_000176]	1.54817e-06	5.7658
A_23_P76529	ITGB7	NM_000889	Homo sapiens integrin, beta 7 (ITGB7), mRNA [NM_000889]	0.00827354	5.76457
A_32_P162250	ARHGAP18	NM_033515	Homo sapiens Rho GTPase activating protein 18 (ARHGAP18), mRNA [NM_033515]	0.00138916	5.74384
A_23_P44083	GFPT1	NM_002056	Homo sapiens glutamine-fructose-6-phosphate transaminase 1 (GFPT1), mRNA [NM_002056]	0.00232348	5.73184
A_24_P566916	TncRNA	NR_002802	Homo sapiens trophoblast-derived noncoding RNA (TncRNA) on chromosome 11 [NR_002802]	0.00191112	5.72514
A_23_P103110	MAFF	NM_012323	Homo sapiens v-maf musculoaponeurotic fibrosarcoma oncogene homolog F (avian) (MAFF), transcript variant 1, mRNA [NM_012323]	6.77188e-08	5.72091
A_23_P251387	REPS2	NM_004726	Homo sapiens RALBP1 associated Eps domain containing 2 (REPS2), mRNA [NM_004726]	9.18329e-06	5.71582
A_23_P307536	C1orf113	NM_024676	Homo sapiens chromosome 1 open reading frame 113 (C1orf113), mRNA [NM_024676]	4.55739e-05	5.71445
A_23_P161428	ANKRD22	NM_144590	Homo sapiens ankyrin repeat domain 22 (ANKRD22), mRNA [NM_144590]	0.000193317	5.71335
A_24_P184555	PXN	NM_002859	Homo sapiens paxillin (PXN), mRNA [NM_002859]	5.51342e-07	5.70704
A_23_P210425	MYL9	NM_181526	Homo sapiens myosin, light polypeptide 9, regulatory (MYL9), transcript variant 2, mRNA [NM_181526]	2.85221e-05	5.70388
A_23_P163251	PAQR5	NM_017705	Homo sapiens progestin and adipoQ receptor family member V (PAQR5), mRNA [NM_017705]	7.23546e-05	5.69536
A_23_P405761	RRAS2	NM_012250	Homo sapiens related RAS viral (r-ras) oncogene homolog 2 (RRAS2), mRNA [NM_012250]	0.0048709	5.69422
A_23_P114670	ARHGEF16	NM_014448	Homo sapiens Rho guanine exchange factor (GEF) 16 (ARHGEF16), mRNA [NM_014448]	1.46014e-05	5.69143
A_23_P127186	TACC2	BC010219	Homo sapiens transforming, acidic coiled-coil containing protein 2, mRNA (cDNA clone IMAGE:3450479), with apparent retained intron. [BC010219]	0.000229709	5.67649
A_23_P145096	PLA2G7	NM_005084	Homo sapiens phospholipase A2, group VII (platelet-activating factor acetylhydrolase, plasma) (PLA2G7), mRNA [NM_005084]	0.00706551	5.66325
A_23_P218597	NPAS2	NM_002518	Homo sapiens neuronal PAS domain protein 2 (NPAS2), mRNA [NM_002518]	0.000594717	5.64257
A_23_P4494	DSC2	NM_024422	Homo sapiens desmocollin 2 (DSC2), transcript variant Dsc2a, mRNA [NM_024422]	8.14814e-06	5.62675
A_24_P240166	PHLDB2	NM_145753	Homo sapiens pleckstrin homology-like domain, family B, member 2 (PHLDB2), mRNA [NM_145753]	7.68906e-08	5.62539
A_23_P419624	BLCAP	NM_006698	Homo sapiens bladder cancer associated protein (BLCAP), mRNA [NM_006698]	7.68199e-06	5.60639
A_23_P83857	MAOA	NM_000240	Homo sapiens monoamine oxidase A (MAOA), nuclear gene encoding mitochondrial protein, mRNA [NM_000240]	0.000127595	5.60284
A_23_P251316	CTNND1	NM_001331	Homo sapiens catenin (cadherin-associated protein), delta 1 (CTNND1), mRNA [NM_001331]	0.000438826	5.60216
A_23_P36397	CYP27B1	NM_000785	Homo sapiens cytochrome P450, family 27, subfamily B, polypeptide 1 (CYP27B1), nuclear gene encoding mitochondrial protein, mRNA [NM_000785]	0.00245106	5.59309
A_23_P101380	B3GNT8	NM_198540	Homo sapiens UDP-GlcNAc:betaGal beta-1,3-N-acetylglucosaminyltransferase 8 (B3GNT8), mRNA [NM_198540]	9.05177e-05	5.58164
A_23_P253221	ARHGEF4	NM_032995	Homo sapiens Rho guanine nucleotide exchange factor (GEF) 4 (ARHGEF4), transcript variant 2, mRNA [NM_032995]	0.00108857	5.57907
A_32_P5040	NOTCH2NL	AK075065	Homo sapiens cDNA FLJ90584 fis, clone PLACE1000740, highly similar to Neurogenic locus notch homolog protein 2 precursor. [AK075065]	1.61325e-05	5.56547
A_23_P162734	RNF6	NM_005977	Homo sapiens ring finger protein (C3H2C3 type) 6 (RNF6), transcript variant 1, mRNA [NM_005977]	0.000139359	5.55062
A_24_P213924	KIAA1609	NM_020947	Homo sapiens KIAA1609 (KIAA1609), mRNA [NM_020947]	1.08151e-06	5.54932
A_24_P50890	PVRL1	NM_002855	Homo sapiens poliovirus receptor-related 1 (herpesvirus entry mediator C; nectin) (PVRL1), transcript variant 1, mRNA [NM_002855]	0.00264351	5.54642
A_24_P942743	ZFY	NM_003411	Homo sapiens zinc finger protein, Y-linked (ZFY), mRNA [NM_003411]	8.02336e-07	5.53101
A_24_P734953	LOC388610	NM_001013642	Homo sapiens hypothetical LOC388610 (LOC388610), mRNA [NM_001013642]	6.503e-05	5.52875
A_23_P58009	C3orf52	NM_024616	Homo sapiens chromosome 3 open reading frame 52 (C3orf52), mRNA [NM_024616]	1.49736e-07	5.50985
A_24_P251599	CAV3	NM_033337	Homo sapiens caveolin 3 (CAV3), transcript variant 1, mRNA [NM_033337]	7.94492e-05	5.50726
A_24_P337796	STK17A	NM_004760	Homo sapiens serine/threonine kinase 17a (apoptosis-inducing) (STK17A), mRNA [NM_004760]	6.60278e-05	5.50317
A_23_P22119	PLEC1	NM_201384	Homo sapiens plectin 1, intermediate filament binding protein 500kDa (PLEC1), transcript variant 11, mRNA [NM_201384]	1.15644e-06	5.49988
A_23_P130648	GIPC1	NM_005716	Homo sapiens GIPC PDZ domain containing family, member 1 (GIPC1), transcript variant 1, mRNA [NM_005716]	0.000120501	5.48949
A_23_P317098	KLC3	BC025318	Homo sapiens kinesin light chain 3, mRNA (cDNA clone IMAGE:4310027), complete cds. [BC025318]	0.00217775	5.48923
A_32_P147678	MAP3K9	AK123430	Homo sapiens cDNA FLJ41436 fis, clone BRHIP2007741. [AK123430]	8.03182e-07	5.48739
A_23_P79426	CAB39	NM_016289	Homo sapiens calcium binding protein 39 (CAB39), mRNA [NM_016289]	6.96566e-07	5.48646
A_23_P68970	ARFGAP3	NM_014570	Homo sapiens ADP-ribosylation factor GTPase activating protein 3 (ARFGAP3), mRNA [NM_014570]	5.78261e-05	5.47316
A_32_P224253	DNAH11	NM_003777	Homo sapiens dynein, axonemal, heavy polypeptide 11 (DNAH11), mRNA [NM_003777]	0.00125269	5.45497
A_32_P141135	TRAF3IP3	AK022798	Homo sapiens cDNA FLJ12736 fis, clone NT2RP2000327. [AK022798]	0.000774494	5.44737
A_23_P22473	FTSJ1	NM_177439	Homo sapiens FtsJ homolog 1 (E. coli) (FTSJ1), transcript variant 3, mRNA [NM_177439]	0.000160399	5.44458
A_24_P701776	FLJ43692	NM_001003702	Homo sapiens ARHGEF5-like (FLJ43692), mRNA [NM_001003702]	0.000232675	5.44371
A_23_P333640	PAPLN	NM_173462	Homo sapiens papilin, proteoglycan-like sulfated glycoprotein (PAPLN), mRNA [NM_173462]	0.000104094	5.43106
A_23_P119362	EMP3	NM_001425	Homo sapiens epithelial membrane protein 3 (EMP3), mRNA [NM_001425]	0.00379367	5.4235
A_24_P114551	LPP	NM_005578	Homo sapiens LIM domain containing preferred translocation partner in lipoma (LPP), mRNA [NM_005578]	9.89576e-09	5.41996
A_23_P82324	CARD11	NM_032415	Homo sapiens caspase recruitment domain family, member 11 (CARD11), mRNA [NM_032415]	0.00795182	5.416
A_24_P272290	C6orf145	NM_183373	Homo sapiens chromosome 6 open reading frame 145 (C6orf145), mRNA [NM_183373]	8.03641e-05	5.41369
A_23_P253029	BOK	NM_032515	Homo sapiens BCL2-related ovarian killer (BOK), mRNA [NM_032515]	4.91425e-11	5.37547
A_23_P434352	CAST	NM_173060	Homo sapiens calpastatin (CAST), transcript variant 2, mRNA [NM_173060]	0.00156494	5.36682
A_23_P215024	LRRC1	NM_018214	Homo sapiens leucine rich repeat containing 1 (LRRC1), mRNA [NM_018214]	3.34287e-06	5.3636
A_23_P310022	KIAA1217	NM_019590	Homo sapiens KIAA1217 (KIAA1217), mRNA [NM_019590]	0.000139432	5.36148
A_32_P161762	RUNX2	NM_004348	Homo sapiens runt-related transcription factor 2 (RUNX2), transcript variant 3, mRNA [NM_004348]	2.72453e-06	5.35776
A_24_P84834	DGKA	NM_201444	Homo sapiens diacylglycerol kinase, alpha 80kDa (DGKA), transcript variant 1, mRNA [NM_201444]	3.66068e-07	5.33813
A_23_P36700	TAPBPL	NM_018009	Homo sapiens TAP binding protein-like (TAPBPL), mRNA [NM_018009]	5.90248e-06	5.33674
A_24_P652609	RP11-138L21.1	AK054645	Homo sapiens cDNA FLJ30083 fis, clone BGGI12001097, weakly similar to Homo sapiens contactin associated protein (Caspr) mRNA. [AK054645]	7.11333e-09	5.33643
A_23_P76901	PLEKHG3	AB011171	Homo sapiens mRNA for KIAA0599 protein, partial cds. [AB011171]	1.98104e-07	5.33269
A_23_P21363	AHNAK	NM_024060	Homo sapiens AHNAK nucleoprotein (desmoyokin) (AHNAK), transcript variant 2, mRNA [NM_024060]	0.000164969	5.32327
A_23_P216291	CPA6	NM_020361	Homo sapiens carboxypeptidase A6 (CPA6), mRNA [NM_020361]	0.000145086	5.31332
A_23_P314024	HLA-F	NM_018950	Homo sapiens major histocompatibility complex, class I, F (HLA-F), mRNA [NM_018950]	0.00117165	5.29812
A_23_P88184	BTBD7	NM_001002860	Homo sapiens BTB (POZ) domain containing 7 (BTBD7), transcript variant 1, mRNA [NM_001002860]	0.000181417	5.28519
A_24_P217848	HIST1H2AK	BC034487	Homo sapiens histone 1, H2ak, mRNA (cDNA clone IMAGE:4825623), with apparent retained intron. [BC034487]	0.000265084	5.28479
A_23_P73097	RGS20	NM_170587	Homo sapiens regulator of G-protein signalling 20 (RGS20), transcript variant 1, mRNA [NM_170587]	0.000222971	5.28239
A_24_P327886	TCEA3	NM_003196	Homo sapiens transcription elongation factor A (SII), 3 (TCEA3), mRNA [NM_003196]	0.000385892	5.26984
A_23_P336040	GOPC	NM_020399	Homo sapiens golgi associated PDZ and coiled-coil motif containing (GOPC), transcript variant 1, mRNA [NM_020399]	0.000252455	5.26591
A_23_P358944	PML	NM_002675	Homo sapiens promyelocytic leukemia (PML), transcript variant 6, mRNA [NM_002675]	0.00486596	5.26222
A_23_P54055	JUB	NM_032876	Homo sapiens jub, ajuba homolog (Xenopus laevis) (JUB), transcript variant 1, mRNA [NM_032876]	5.98047e-07	5.25997
A_24_P179569	LAMA3	NM_000227	Homo sapiens laminin, alpha 3 (LAMA3), transcript variant 2, mRNA [NM_000227]	6.30262e-05	5.25603
A_24_P389608	C10orf47	NM_153256	Homo sapiens chromosome 10 open reading frame 47 (C10orf47), mRNA [NM_153256]	0.000460721	5.24906
A_23_P92727	RAI14	NM_015577	Homo sapiens retinoic acid induced 14 (RAI14), mRNA [NM_015577]	6.35015e-06	5.23921
A_24_P307065	LOC643159	XM_933001	PREDICTED: Homo sapiens similar to activating transcription factor 4, transcript variant 3 (LOC643159), mRNA [XM_933001]	0.000242516	5.23428
A_23_P170626	CHCHD7	NM_001011667	Homo sapiens coiled-coil-helix-coiled-coil-helix domain containing 7 (CHCHD7), transcript variant 1, mRNA [NM_001011667]	1.6972e-06	5.22348
A_23_P202334	FGFR2	NM_000141	Homo sapiens fibroblast growth factor receptor 2 (bacteria-expressed kinase, keratinocyte growth factor receptor, craniofacial dysostosis 1, Crouzon syndrome, Pfeiffer syndrome, Jackson-Weiss syndrome) (FGFR2), transcript variant 1, mRNA [NM_000141]	3.35203e-05	5.22043
A_24_P339944	PDGFB	NM_002608	Homo sapiens platelet-derived growth factor beta polypeptide (simian sarcoma viral (v-sis) oncogene homolog) (PDGFB), transcript variant 1, mRNA [NM_002608]	0.000790447	5.21998
A_24_P120537	SH3RF2	NM_152550	Homo sapiens SH3 domain containing ring finger 2 (SH3RF2), mRNA [NM_152550]	8.66918e-06	5.21572
A_23_P120931	APOBEC3C	NM_014508	Homo sapiens apolipoprotein B mRNA editing enzyme, catalytic polypeptide-like 3C (APOBEC3C), mRNA [NM_014508]	7.60891e-06	5.21388
A_23_P256205	ABLIM3	NM_014945	Homo sapiens actin binding LIM protein family, member 3 (ABLIM3), mRNA [NM_014945]	7.88773e-05	5.20513
A_23_P4662	BCL3	NM_005178	Homo sapiens B-cell CLL/lymphoma 3 (BCL3), mRNA [NM_005178]	0.000220904	5.20203
A_23_P106675	PLCG2	NM_002661	Homo sapiens phospholipase C, gamma 2 (phosphatidylinositol-specific) (PLCG2), mRNA [NM_002661]	2.17072e-05	5.20061
A_24_P99216	LRP10	NM_014045	Homo sapiens low density lipoprotein receptor-related protein 10 (LRP10), mRNA [NM_014045]	5.79446e-05	5.1933
A_24_P215765	ATP10A	NM_024490	Homo sapiens ATPase, Class V, type 10A (ATP10A), mRNA [NM_024490]	0.00420085	5.19168
A_23_P163227	CKMT1B	AK094322	Homo sapiens cDNA FLJ37003 fis, clone BRACE2008500, highly similar to CREATINE KINASE, UBIQUITOUS MITOCHONDRIAL PRECURSOR (EC 2.7.3.2). [AK094322]	4.66578e-07	5.18913
A_23_P327022	MDFIC	NM_199072	Homo sapiens MyoD family inhibitor domain containing (MDFIC), mRNA [NM_199072]	0.000306958	5.18769
A_24_P348861	TTTY15	NR_001545	Homo sapiens testis-specific transcript, Y-linked 15 (TTTY15) on chromosome Y [NR_001545]	5.45916e-06	5.18231
A_23_P354027	KCTD11	NM_001002914	Homo sapiens potassium channel tetramerisation domain containing 11 (KCTD11), mRNA [NM_001002914]	7.57122e-05	5.17992
A_23_P259207	FLJ10916	NM_018271	Homo sapiens hypothetical protein FLJ10916 (FLJ10916), mRNA [NM_018271]	0.00181456	5.17189
A_23_P317620	ARL4C	NM_005737	Homo sapiens ADP-ribosylation factor-like 4C (ARL4C), mRNA [NM_005737]	0.00533121	5.16946
A_23_P323774	PTER	NM_001001484	Homo sapiens phosphotriesterase related (PTER), transcript variant 1, mRNA [NM_001001484]	0.000293408	5.16584
A_23_P357101	APOBEC3F	NM_145298	Homo sapiens apolipoprotein B mRNA editing enzyme, catalytic polypeptide-like 3F (APOBEC3F), transcript variant 1, mRNA [NM_145298]	3.8515e-06	5.158
A_23_P101297	EML2	NM_012155	Homo sapiens echinoderm microtubule associated protein like 2 (EML2), mRNA [NM_012155]	0.000132784	5.15193
A_32_P14187	TFAP2A	NM_003220	Homo sapiens transcription factor AP-2 alpha (activating enhancer binding protein 2 alpha) (TFAP2A), transcript variant 1, mRNA [NM_003220]	1.45448e-08	5.15056
A_23_P12241	MCOLN3	NM_018298	Homo sapiens mucolipin 3 (MCOLN3), mRNA [NM_018298]	1.35526e-05	5.14979
A_24_P8109	TMEM16J	NM_001012302	Homo sapiens transmembrane protein 16J (TMEM16J), mRNA [NM_001012302]	0.00743941	5.14485
A_23_P38106	SPHK1	NM_021972	Homo sapiens sphingosine kinase 1 (SPHK1), transcript variant 1, mRNA [NM_021972]	2.7635e-05	5.14372
A_23_P255785	NCK1	NM_006153	Homo sapiens NCK adaptor protein 1 (NCK1), mRNA [NM_006153]	0.000178882	5.1434
A_24_P251040	ARTN	NM_057091	Homo sapiens artemin (ARTN), transcript variant 2, mRNA [NM_057091]	0.00116885	5.13052
A_23_P106194	FOS	NM_005252	Homo sapiens v-fos FBJ murine osteosarcoma viral oncogene homolog (FOS), mRNA [NM_005252]	0.00354876	5.12294
A_23_P162165	KCTD14	NM_023930	Homo sapiens potassium channel tetramerisation domain containing 14 (KCTD14), mRNA [NM_023930]	7.69965e-05	5.11228
A_23_P51646	PLK3	NM_004073	Homo sapiens polo-like kinase 3 (Drosophila) (PLK3), mRNA [NM_004073]	2.42612e-05	5.10819
A_24_P42693	CYP4F11	NM_021187	Homo sapiens cytochrome P450, family 4, subfamily F, polypeptide 11 (CYP4F11), mRNA [NM_021187]	0.00085822	5.10085
A_24_P408321	OSBPL2	NM_144498	Homo sapiens oxysterol binding protein-like 2 (OSBPL2), transcript variant 2, mRNA [NM_144498]	1.09118e-05	5.0851
A_24_P113674	HLA-B	NM_005514	Homo sapiens major histocompatibility complex, class I, B (HLA-B), mRNA [NM_005514]	9.05013e-05	5.07713
A_23_P405878	C12orf54	NM_152319	Homo sapiens chromosome 12 open reading frame 54 (C12orf54), mRNA [NM_152319]	7.39103e-05	5.07257
A_23_P150693	FJX1	NM_014344	Homo sapiens four jointed box 1 (Drosophila) (FJX1), mRNA [NM_014344]	0.00352024	5.06875
A_23_P122662	GFOD1	NM_018988	Homo sapiens glucose-fructose oxidoreductase domain containing 1 (GFOD1), mRNA [NM_018988]	1.05309e-06	5.0679
A_23_P215956	MYC	NM_002467	Homo sapiens v-myc myelocytomatosis viral oncogene homolog (avian) (MYC), mRNA [NM_002467]	2.67517e-05	5.06135
A_23_P68198	SH3YL1	NM_015677	Homo sapiens SH3 domain containing, Ysc84-like 1 (S. cerevisiae) (SH3YL1), mRNA [NM_015677]	5.39251e-05	5.05039
A_23_P202881	FEZ1	NM_005103	Homo sapiens fasciculation and elongation protein zeta 1 (zygin I) (FEZ1), transcript variant 1, mRNA [NM_005103]	8.33135e-05	5.04248
A_23_P51105	CRIM1	NM_016441	Homo sapiens cysteine rich transmembrane BMP regulator 1 (chordin-like) (CRIM1), mRNA [NM_016441]	3.5631e-07	5.03309
A_24_P31929	PRRG1	NM_000950	Homo sapiens proline rich Gla (G-carboxyglutamic acid) 1 (PRRG1), mRNA [NM_000950]	2.61692e-05	5.01895
A_23_P39590	XDH	NM_000379	Homo sapiens xanthine dehydrogenase (XDH), mRNA [NM_000379]	0.00530354	5.0163
A_23_P1722	C11orf52	NM_080659	Homo sapiens chromosome 11 open reading frame 52 (C11orf52), mRNA [NM_080659]	8.30663e-06	5.01127
A_24_P18105	ASPH	NM_004318	Homo sapiens aspartate beta-hydroxylase (ASPH), transcript variant 1, mRNA [NM_004318]	0.000297859	5.00803
A_23_P18598	PI4K2B	NM_018323	Homo sapiens phosphatidylinositol 4-kinase type 2 beta (PI4K2B), mRNA [NM_018323]	8.20249e-06	4.99798
A_23_P164011	SOX15	NM_006942	Homo sapiens SRY (sex determining region Y)-box 15 (SOX15), mRNA [NM_006942]	0.000707231	4.99368
A_23_P209904	GPC1	NM_002081	Homo sapiens glypican 1 (GPC1), mRNA [NM_002081]	3.11413e-10	4.9477
A_23_P6596	HES1	NM_005524	Homo sapiens hairy and enhancer of split 1, (Drosophila) (HES1), mRNA [NM_005524]	0.0049596	4.94718
A_23_P389102	MYO1D	NM_015194	Homo sapiens myosin ID (MYO1D), mRNA [NM_015194]	5.07898e-05	4.94633
A_23_P149281	EPHA2	NM_004431	Homo sapiens EPH receptor A2 (EPHA2), mRNA [NM_004431]	0.000135864	4.94108
A_23_P372888	SC5DL	NM_006918	Homo sapiens sterol-C5-desaturase (ERG3 delta-5-desaturase homolog, fungal)-like (SC5DL), transcript variant 1, mRNA [NM_006918]	4.53924e-05	4.93799
A_23_P353125	FSIP1	NM_152597	Homo sapiens fibrous sheath interacting protein 1 (FSIP1), mRNA [NM_152597]	0.000162378	4.93159
A_23_P42706	HOXA11	NM_005523	Homo sapiens homeobox A11 (HOXA11), mRNA [NM_005523]	1.29032e-05	4.92723
A_24_P104512	EVPL	NM_001988	Homo sapiens envoplakin (EVPL), mRNA [NM_001988]	1.21931e-06	4.92204
A_23_P138835	CAPN1	NM_005186	Homo sapiens calpain 1, (mu/I) large subunit (CAPN1), mRNA [NM_005186]	1.61428e-05	4.91792
A_23_P205370	ASB2	NM_016150	Homo sapiens ankyrin repeat and SOCS box-containing 2 (ASB2), mRNA [NM_016150]	0.00217874	4.89595
A_23_P408094	MXD1	NM_002357	Homo sapiens MAX dimerization protein 1 (MXD1), mRNA [NM_002357]	0.00216029	4.89239
A_23_P31177	TMEM140	NM_018295	Homo sapiens transmembrane protein 140 (TMEM140), mRNA [NM_018295]	0.00117378	4.88728
A_24_P229884	LOC440335	BC022385	Homo sapiens cDNA clone IMAGE:4296365. [BC022385]	0.00105456	4.88482
A_23_P384024	CCDC50	NM_178335	Homo sapiens coiled-coil domain containing 50 (CCDC50), transcript variant 2, mRNA [NM_178335]	0.00555509	4.88273
A_24_P405205	ATP2B4	NM_001684	Homo sapiens ATPase, Ca++ transporting, plasma membrane 4 (ATP2B4), transcript variant 2, mRNA [NM_001684]	1.61449e-06	4.8776
A_23_P254404	SH3PX3	NM_153271	Homo sapiens SH3 and PX domain containing 3 (SH3PX3), mRNA [NM_153271]	4.47556e-06	4.87441
A_24_P245646	TP53RK	NM_033550	Homo sapiens TP53 regulating kinase (TP53RK), mRNA [NM_033550]	2.48549e-05	4.8722
A_24_P51855	DUSP7	NM_001947	Homo sapiens dual specificity phosphatase 7 (DUSP7), mRNA [NM_001947]	5.35762e-09	4.86754
A_23_P133474	GPX3	NM_002084	Homo sapiens glutathione peroxidase 3 (plasma) (GPX3), mRNA [NM_002084]	0.0038662	4.86059
A_23_P168828	KLF10	NM_005655	Homo sapiens Kruppel-like factor 10 (KLF10), transcript variant 1, mRNA [NM_005655]	4.65882e-08	4.85049
A_23_P29769	WWTR1	AL050107	Homo sapiens mRNA; cDNA DKFZp586I1419 (from clone DKFZp586I1419); partial cds. [AL050107]	0.00052623	4.84696
A_23_P13822	STYK1	NM_018423	Homo sapiens serine/threonine/tyrosine kinase 1 (STYK1), mRNA [NM_018423]	1.35868e-07	4.84662
A_23_P215790	EGFR	NM_005228	Homo sapiens epidermal growth factor receptor (erythroblastic leukemia viral (v-erb-b) oncogene homolog, avian) (EGFR), transcript variant 1, mRNA [NM_005228]	0.00043734	4.84362
A_24_P114103	C1orf51	NM_144697	Homo sapiens chromosome 1 open reading frame 51 (C1orf51), mRNA [NM_144697]	4.68472e-05	4.84128
A_23_P218203	PLA2G4B	BC025290	Homo sapiens phospholipase A2, group IVB (cytosolic), mRNA (cDNA clone IMAGE:4556397), complete cds. [BC025290]	0.000415161	4.84073
A_23_P372874	S100A13	NM_005979	Homo sapiens S100 calcium binding protein A13 (S100A13), transcript variant 2, mRNA [NM_005979]	1.84869e-08	4.82549
A_23_P371787	KIAA0247	NM_014734	Homo sapiens KIAA0247 (KIAA0247), mRNA [NM_014734]	0.00126483	4.82446
A_24_P103803	B4GALT1	NM_001497	Homo sapiens UDP-Gal:betaGlcNAc beta 1,4- galactosyltransferase, polypeptide 1 (B4GALT1), mRNA [NM_001497]	8.89023e-07	4.82028
A_23_P155335	PLD1	NM_002662	Homo sapiens phospholipase D1, phosphatidylcholine-specific (PLD1), mRNA [NM_002662]	0.00050862	4.80932
A_23_P49338	TNFRSF12A	NM_016639	Homo sapiens tumor necrosis factor receptor superfamily, member 12A (TNFRSF12A), mRNA [NM_016639]	1.50445e-05	4.80541
A_23_P30069	FLJ31033	AK023743	Homo sapiens cDNA FLJ13681 fis, clone PLACE2000014, weakly similar to HYPOTHETICAL HELICASE C28H8.3 IN CHROMOSOME III. [AK023743]	0.00820066	4.79877
A_23_P204375	GPR92	NM_020400	Homo sapiens G protein-coupled receptor 92 (GPR92), mRNA [NM_020400]	0.000730125	4.78684
A_24_P116233	C13orf1	NM_020456	Homo sapiens chromosome 13 open reading frame 1 (C13orf1), mRNA [NM_020456]	4.62437e-06	4.77698
A_23_P169154	KIAA1815	NM_024896	Homo sapiens KIAA1815 (KIAA1815), mRNA [NM_024896]	0.000362802	4.77368
A_23_P208029	DSC3	NM_024423	Homo sapiens desmocollin 3 (DSC3), transcript variant Dsc3b, mRNA [NM_024423]	0.00204413	4.76692
A_23_P14184	THSD1	NM_018676	Homo sapiens thrombospondin, type I, domain containing 1 (THSD1), transcript variant 1, mRNA [NM_018676]	1.05719e-05	4.75661
A_23_P353005	IBRDC1	NM_152553	Homo sapiens IBR domain containing 1 (IBRDC1), mRNA [NM_152553]	3.74422e-05	4.75619
A_23_P120153	RNF149	NM_173647	Homo sapiens ring finger protein 149 (RNF149), mRNA [NM_173647]	3.72238e-08	4.75171
A_32_P234459	HLA-H	NR_001434	Homo sapiens major histocompatibility complex, class I, H (pseudogene) (HLA-H) on chromosome 6 [NR_001434]	0.000547239	4.74986
A_23_P65262	RP11-298P3.3	NM_033111	Homo sapiens CG016 (LOC88523), mRNA [NM_033111]	0.000399416	4.74946
A_32_P171061	ASCL2	NM_005170	Homo sapiens achaete-scute complex-like 2 (Drosophila) (ASCL2), mRNA [NM_005170]	0.00579441	4.74621
A_23_P70968	HOXA7	NM_006896	Homo sapiens homeobox A7 (HOXA7), mRNA [NM_006896]	8.92113e-06	4.73099
A_32_P305888	SH3TC2	NM_024577	Homo sapiens SH3 domain and tetratricopeptide repeats 2 (SH3TC2), mRNA [NM_024577]	0.00288038	4.73044
A_23_P158277	TMCO4	NM_181719	Homo sapiens transmembrane and coiled-coil domains 4 (TMCO4), mRNA [NM_181719]	7.11552e-05	4.71852
A_24_P36457	STX16	NM_001001433	Homo sapiens syntaxin 16 (STX16), transcript variant 1, mRNA [NM_001001433]	3.11604e-06	4.71145
A_23_P55738	CEACAM1	NM_001712	Homo sapiens carcinoembryonic antigen-related cell adhesion molecule 1 (biliary glycoprotein) (CEACAM1), transcript variant 1, mRNA [NM_001712]	0.00560753	4.71062
A_23_P57277	C21orf7	NM_020152	Homo sapiens chromosome 21 open reading frame 7 (C21orf7), mRNA [NM_020152]	3.06169e-05	4.70922
A_23_P36345	STARD10	NM_006645	Homo sapiens START domain containing 10 (STARD10), mRNA [NM_006645]	1.64769e-08	4.70739
A_23_P39076	RRAS	NM_006270	Homo sapiens related RAS viral (r-ras) oncogene homolog (RRAS), mRNA [NM_006270]	0.000275727	4.70162
A_23_P88489	CATSPER2	NM_172095	Homo sapiens cation channel, sperm associated 2 (CATSPER2), transcript variant 2, mRNA [NM_172095]	0.000129109	4.69702
A_23_P393880	KIAA1244	NM_020340	Homo sapiens KIAA1244 (KIAA1244), mRNA [NM_020340]	0.000183148	4.69369
A_23_P414978	NUDT14	NM_177533	Homo sapiens nudix (nucleoside diphosphate linked moiety X)-type motif 14 (NUDT14), mRNA [NM_177533]	6.18376e-05	4.68717
A_24_P120115	CFLAR	NM_003879	Homo sapiens CASP8 and FADD-like apoptosis regulator (CFLAR), mRNA [NM_003879]	3.56465e-08	4.67876
A_24_P133475	DHRS1	NM_138452	Homo sapiens dehydrogenase/reductase (SDR family) member 1 (DHRS1), mRNA [NM_138452]	2.22033e-05	4.67603
A_23_P32474	CDCP1	NM_022842	Homo sapiens CUB domain containing protein 1 (CDCP1), transcript variant 1, mRNA [NM_022842]	8.15572e-05	4.67157
A_23_P348684	LMO6	NM_006150	Homo sapiens LIM domain only 6 (LMO6), mRNA [NM_006150]	9.49796e-08	4.67131
A_23_P4821	JUNB	NM_002229	Homo sapiens jun B proto-oncogene (JUNB), mRNA [NM_002229]	3.08159e-05	4.6629
A_23_P65442	ISGF3G	NM_006084	Homo sapiens interferon-stimulated transcription factor 3, gamma 48kDa (ISGF3G), mRNA [NM_006084]	0.00103836	4.65904
A_23_P211445	LIMK2	NM_016733	Homo sapiens LIM domain kinase 2 (LIMK2), transcript variant 2b, mRNA [NM_016733]	1.53125e-07	4.6542
A_23_P107597	ATP8B1	NM_005603	Homo sapiens ATPase, Class I, type 8B, member 1 (ATP8B1), mRNA [NM_005603]	2.30645e-06	4.65205
A_23_P318115	LOC57228	NM_001031628	Homo sapiens small trans-membrane and glycosylated protein (LOC57228), transcript variant 1, mRNA [NM_001031628]	2.54105e-06	4.64734
A_23_P162640	GABARAPL1	NM_031412	Homo sapiens GABA(A) receptor-associated protein like 1 (GABARAPL1), mRNA [NM_031412]	0.000247026	4.64135
A_23_P79155	GPR39	NM_001508	Homo sapiens G protein-coupled receptor 39 (GPR39), mRNA [NM_001508]	0.000437132	4.6253
A_24_P114617	CHMP2B	NM_014043	Homo sapiens chromatin modifying protein 2B (CHMP2B), mRNA [NM_014043]	2.05929e-05	4.62419
A_23_P58676	C5orf23	NM_024563	Homo sapiens chromosome 5 open reading frame 23 (C5orf23), mRNA [NM_024563]	0.000813341	4.62141
A_24_P53051	LACTB	NM_171846	Homo sapiens lactamase, beta (LACTB), nuclear gene encoding mitochondrial protein, transcript variant 2, mRNA [NM_171846]	1.04072e-08	4.61866
A_24_P277615	TRIM7	NM_033342	Homo sapiens tripartite motif-containing 7 (TRIM7), transcript variant 6, mRNA [NM_033342]	3.05428e-08	4.59647
A_23_P130780	GLTSCR1	NM_015711	Homo sapiens glioma tumor suppressor candidate region gene 1 (GLTSCR1), mRNA [NM_015711]	9.28908e-06	4.59519
A_23_P152727	PLEKHM1	NM_014798	Homo sapiens pleckstrin homology domain containing, family M (with RUN domain) member 1 (PLEKHM1), mRNA [NM_014798]	0.000405247	4.59367
A_23_P54846	HERPUD1	NM_014685	Homo sapiens homocysteine-inducible, endoplasmic reticulum stress-inducible, ubiquitin-like domain member 1 (HERPUD1), transcript variant 1, mRNA [NM_014685]	0.000130485	4.58646
A_23_P30666	TNFRSF21	NM_014452	Homo sapiens tumor necrosis factor receptor superfamily, member 21 (TNFRSF21), mRNA [NM_014452]	3.85109e-05	4.58478
A_23_P87560	BTG1	NM_001731	Homo sapiens B-cell translocation gene 1, anti-proliferative (BTG1), mRNA [NM_001731]	0.000613479	4.57522
A_23_P55584	RIOK3	NM_145906	Homo sapiens RIO kinase 3 (yeast) (RIOK3), transcript variant 2, mRNA [NM_145906]	0.00160398	4.55643
A_23_P152406	CAPNS2	NM_032330	Homo sapiens calpain, small subunit 2 (CAPNS2), mRNA [NM_032330]	0.000862458	4.54246
A_23_P158880	STARD5	NM_181900	Homo sapiens START domain containing 5 (STARD5), transcript variant 1, mRNA [NM_181900]	0.00397657	4.53449
A_24_P215352	PRKCDBP	NM_145040	Homo sapiens protein kinase C, delta binding protein (PRKCDBP), mRNA [NM_145040]	4.53298e-05	4.51198
A_23_P413923	DMRTA1	NM_022160	Homo sapiens DMRT-like family A1 (DMRTA1), mRNA [NM_022160]	7.42416e-06	4.50184
A_23_P310921	PCDH7	NM_002589	Homo sapiens BH-protocadherin (brain-heart) (PCDH7), transcript variant a, mRNA [NM_002589]	0.000820386	4.47623
A_23_P110184	SC4MOL	NM_006745	Homo sapiens sterol-C4-methyl oxidase-like (SC4MOL), transcript variant 1, mRNA [NM_006745]	0.00969955	4.47535
A_24_P46953	SGK3	NM_013257	Homo sapiens serum/glucocorticoid regulated kinase family, member 3 (SGK3), transcript variant 1, mRNA [NM_013257]	1.11283e-05	4.47456
A_23_P320054	WNT7B	NM_058238	Homo sapiens wingless-type MMTV integration site family, member 7B (WNT7B), mRNA [NM_058238]	0.000567904	4.47244
A_24_P328320	GORASP2	NM_015530	Homo sapiens golgi reassembly stacking protein 2, 55kDa (GORASP2), mRNA [NM_015530]	6.50666e-06	4.47081
A_23_P370635	MBOAT2	NM_138799	Homo sapiens membrane bound O-acyltransferase domain containing 2 (MBOAT2), mRNA [NM_138799]	0.000265675	4.46976
A_23_P55281	HOXB7	NM_004502	Homo sapiens homeobox B7 (HOXB7), mRNA [NM_004502]	1.04364e-05	4.46926
A_23_P118894	ATAD4	NM_024320	Homo sapiens ATPase family, AAA domain containing 4 (ATAD4), mRNA [NM_024320]	0.00137552	4.46792
A_23_P361569	SLC35F5	AK025657	Homo sapiens cDNA: FLJ22004 fis, clone HEP06871. [AK025657]	3.40597e-05	4.45987
A_23_P151267	LIMA1	NM_016357	Homo sapiens LIM domain and actin binding 1 (LIMA1), mRNA [NM_016357]	3.22242e-05	4.44755
A_24_P65941	C21orf96	AK024509	Homo sapiens cDNA: FLJ20856 fis, clone ADKA01509. [AK024509]	0.0001978	4.4264
A_24_P95822	NPTN	NM_012428	Homo sapiens neuroplastin (NPTN), transcript variant beta, mRNA [NM_012428]	1.31358e-05	4.42575
A_23_P413051	NOXO1	NM_144603	Homo sapiens NADPH oxidase organizer 1 (NOXO1), transcript variant a, mRNA [NM_144603]	7.04658e-05	4.42326
A_24_P98249	TACC1	NM_006283	Homo sapiens transforming, acidic coiled-coil containing protein 1 (TACC1), mRNA [NM_006283]	0.00022391	4.41667
A_23_P155229	SSR3	NM_007107	Homo sapiens signal sequence receptor, gamma (translocon-associated protein gamma) (SSR3), mRNA [NM_007107]	6.01318e-05	4.41373
A_23_P102364	NGEF	NM_019850	Homo sapiens neuronal guanine nucleotide exchange factor (NGEF), mRNA [NM_019850]	2.48253e-05	4.4121
A_24_P258473	SMOC1	NM_001034852	Homo sapiens SPARC related modular calcium binding 1 (SMOC1), transcript variant 1, mRNA [NM_001034852]	0.00284733	4.40603
A_23_P20275	PLEKHF2	NM_024613	Homo sapiens pleckstrin homology domain containing, family F (with FYVE domain) member 2 (PLEKHF2), mRNA [NM_024613]	7.32093e-07	4.36666
A_23_P17870	C22orf5	NM_012264	Homo sapiens chromosome 22 open reading frame 5 (C22orf5), mRNA [NM_012264]	2.14763e-07	4.36454
A_32_P131377	REEP5	NM_005669	Homo sapiens receptor accessory protein 5 (REEP5), mRNA [NM_005669]	2.15717e-05	4.36079
A_23_P61778	NXN	NM_022463	Homo sapiens nucleoredoxin (NXN), mRNA [NM_022463]	4.89508e-06	4.35734
A_24_P11384	ERRFI1	NM_018948	Homo sapiens ERBB receptor feedback inhibitor 1 (ERRFI1), mRNA [NM_018948]	9.8646e-05	4.35437
A_23_P118536	SLFN12	NM_018042	Homo sapiens schlafen family member 12 (SLFN12), mRNA [NM_018042]	0.000878177	4.34923
A_23_P419714	BTBD11	NM_152322	Homo sapiens BTB (POZ) domain containing 11 (BTBD11), transcript variant 1, mRNA [NM_152322]	1.23888e-05	4.34524
A_23_P23341	CNKSR1	NM_006314	Homo sapiens connector enhancer of kinase suppressor of Ras 1 (CNKSR1), mRNA [NM_006314]	2.70469e-06	4.33841
A_23_P134109	EPB41L2	NM_001431	Homo sapiens erythrocyte membrane protein band 4.1-like 2 (EPB41L2), mRNA [NM_001431]	0.00165807	4.33463
A_24_P149844	ABI1	NM_005470	Homo sapiens abl-interactor 1 (ABI1), transcript variant 1, mRNA [NM_005470]	9.58524e-05	4.32563
A_23_P67355	PRRG2	NM_000951	Homo sapiens proline rich Gla (G-carboxyglutamic acid) 2 (PRRG2), mRNA [NM_000951]	3.15557e-07	4.32408
A_23_P56369	ABCA12	NM_173076	Homo sapiens ATP-binding cassette, sub-family A (ABC1), member 12 (ABCA12), transcript variant 1, mRNA [NM_173076]	0.00360727	4.32341
A_23_P30848	HLA-E	NM_005516	Homo sapiens major histocompatibility complex, class I, E (HLA-E), mRNA [NM_005516]	0.000390216	4.31605
A_23_P219176	RXRA	NM_002957	Homo sapiens retinoid X receptor, alpha (RXRA), mRNA [NM_002957]	3.02995e-06	4.31358
A_24_P91852	DYNLT3	NM_006520	Homo sapiens dynein, light chain, Tctex-type 3 (DYNLT3), mRNA [NM_006520]	0.000582681	4.31343
A_23_P81859	HIST1H2AH	NM_080596	Homo sapiens histone 1, H2ah (HIST1H2AH), mRNA [NM_080596]	0.00273645	4.31064
A_24_P941912	DTX3L	NM_138287	Homo sapiens deltex 3-like (Drosophila) (DTX3L), mRNA [NM_138287]	0.00200716	4.31036
A_23_P157365	FAM3C	NM_014888	Homo sapiens family with sequence similarity 3, member C (FAM3C), transcript variant 1, mRNA [NM_014888]	0.00282741	4.30356
A_24_P18190	HSPA5	NM_005347	Homo sapiens heat shock 70kDa protein 5 (glucose-regulated protein, 78kDa) (HSPA5), mRNA [NM_005347]	0.00518178	4.30341
A_23_P15174	MT1F	NM_005949	Homo sapiens metallothionein 1F (functional) (MT1F), mRNA [NM_005949]	7.71829e-05	4.30104
A_23_P154894	CSTB	NM_000100	Homo sapiens cystatin B (stefin B) (CSTB), mRNA [NM_000100]	0.000605672	4.29681
A_23_P138680	IL15RA	NM_172200	Homo sapiens interleukin 15 receptor, alpha (IL15RA), transcript variant 2, mRNA [NM_172200]	0.00343726	4.29124
A_23_P52101	CYB5R1	NM_016243	Homo sapiens cytochrome b5 reductase 1 (CYB5R1), mRNA [NM_016243]	1.66562e-05	4.28655
A_32_P219520	TNFAIP8	NM_014350	Homo sapiens tumor necrosis factor, alpha-induced protein 8 (TNFAIP8), mRNA [NM_014350]	9.48295e-05	4.28568
A_23_P149259	TMEM79	NM_032323	Homo sapiens transmembrane protein 79 (TMEM79), mRNA [NM_032323]	2.11169e-05	4.28242
A_32_P161855	KIAA1199	NM_018689	Homo sapiens KIAA1199 (KIAA1199), mRNA [NM_018689]	0.00118506	4.28233
A_23_P169030	TNFRSF10B	NM_003842	Homo sapiens tumor necrosis factor receptor superfamily, member 10b (TNFRSF10B), transcript variant 1, mRNA [NM_003842]	5.4155e-06	4.27951
A_24_P123052	RAP2B	NM_002886	Homo sapiens RAP2B, member of RAS oncogene family (RAP2B), mRNA [NM_002886]	3.30389e-05	4.2789
A_24_P110012	FLJ45422	NM_001004349	Homo sapiens FLJ45422 protein (FLJ45422), mRNA [NM_001004349]	0.00608451	4.26894
A_24_P925314	GM2A	NM_000405	Homo sapiens GM2 ganglioside activator (GM2A), mRNA [NM_000405]	0.00890343	4.26407
A_23_P5778	RAB17	NM_022449	Homo sapiens RAB17, member RAS oncogene family (RAB17), mRNA [NM_022449]	4.12758e-06	4.25865
A_32_P111701	GYG2	NM_003918	Homo sapiens glycogenin 2 (GYG2), mRNA [NM_003918]	7.29295e-05	4.25628
A_32_P339640	C20orf197	NM_173644	Homo sapiens chromosome 20 open reading frame 197 (C20orf197), mRNA [NM_173644]	0.000211273	4.25495
A_24_P149314	ULBP2	NM_025217	Homo sapiens UL16 binding protein 2 (ULBP2), mRNA [NM_025217]	1.91819e-05	4.25473
A_23_P144188	SLC33A1	NM_004733	Homo sapiens solute carrier family 33 (acetyl-CoA transporter), member 1 (SLC33A1), mRNA [NM_004733]	0.00642397	4.25226
A_23_P58747	N4BP3	NM_015111	Homo sapiens Nedd4 binding protein 3 (N4BP3), mRNA [NM_015111]	8.06431e-07	4.24656
A_23_P83624	COTL1	NM_021149	Homo sapiens coactosin-like 1 (Dictyostelium) (COTL1), mRNA [NM_021149]	0.000982285	4.24405
A_23_P107981	SULT2B1	NM_004605	Homo sapiens sulfotransferase family, cytosolic, 2B, member 1 (SULT2B1), transcript variant 1, mRNA [NM_004605]	0.00756478	4.24385
A_23_P162766	DOCK9	NM_015296	Homo sapiens dedicator of cytokinesis 9 (DOCK9), mRNA [NM_015296]	1.37006e-07	4.23645
A_23_P135061	CORO2A	NM_003389	Homo sapiens coronin, actin binding protein, 2A (CORO2A), transcript variant 1, mRNA [NM_003389]	0.00031436	4.22573
A_23_P91783	ARHGAP8	NM_181335	Homo sapiens Rho GTPase activating protein 8 (ARHGAP8), transcript variant 2, mRNA [NM_181335]	0.00148605	4.22519
A_23_P382199	VAPA	NM_003574	Homo sapiens VAMP (vesicle-associated membrane protein)-associated protein A, 33kDa (VAPA), transcript variant 1, mRNA [NM_003574]	0.000321841	4.22424
A_32_P151823	LOC346887	BC040619	Homo sapiens similar to solute carrier family 16 (monocarboxylic acid transporters), member 14, mRNA (cDNA clone IMAGE:5726657). [BC040619]	1.33587e-07	4.22355
A_23_P169738	SOX7	NM_031439	Homo sapiens SRY (sex determining region Y)-box 7 (SOX7), mRNA [NM_031439]	0.00154535	4.22116
A_23_P112512	MCART1	NM_033412	Homo sapiens mitochondrial carrier triple repeat 1 (MCART1), mRNA [NM_033412]	0.00985429	4.2184
A_24_P408424	MYH9	NM_002473	Homo sapiens myosin, heavy polypeptide 9, non-muscle (MYH9), mRNA [NM_002473]	2.78238e-08	4.20792
A_23_P79889	RAB22A	NM_020673	Homo sapiens RAB22A, member RAS oncogene family (RAB22A), mRNA [NM_020673]	3.71148e-05	4.20523
A_23_P65674	TMOD3	NM_014547	Homo sapiens tropomodulin 3 (ubiquitous) (TMOD3), mRNA [NM_014547]	0.000103484	4.19842
A_24_P238250	LGALS7	NM_002307	Homo sapiens lectin, galactoside-binding, soluble, 7 (galectin 7) (LGALS7), mRNA [NM_002307]	0.0098395	4.19665
A_23_P154400	MLPH	NM_024101	Homo sapiens melanophilin (MLPH), transcript variant 1, mRNA [NM_024101]	3.37093e-06	4.19612
A_24_P160088	PDXK	NM_003681	Homo sapiens pyridoxal (pyridoxine, vitamin B6) kinase (PDXK), mRNA [NM_003681]	0.000549016	4.19132
A_23_P73848	CYorf14	NR_001544	Homo sapiens chromosome Y open reading frame 14 (CYorf14) on chromosome Y [NR_001544]	0.000165849	4.18721
A_24_P78590	ELF1	NM_172373	Homo sapiens E74-like factor 1 (ets domain transcription factor) (ELF1), mRNA [NM_172373]	2.95847e-06	4.18374
A_23_P324554	TMEM16D	NM_178826	Homo sapiens transmembrane protein 16D (TMEM16D), mRNA [NM_178826]	0.000198931	4.17435
A_23_P31873	RAB11FIP1	NM_001002233	Homo sapiens RAB11 family interacting protein 1 (class I) (RAB11FIP1), transcript variant 2, mRNA [NM_001002233]	0.00807032	4.17425
A_23_P130515	CEACAM3	NM_001815	Homo sapiens carcinoembryonic antigen-related cell adhesion molecule 3 (CEACAM3), mRNA [NM_001815]	0.00332089	4.17189
A_24_P383523	SAMD4A	AB028976	Homo sapiens mRNA for KIAA1053 protein, partial cds. [AB028976]	0.00360785	4.16843
A_24_P335048	C10orf118	NM_018017	Homo sapiens chromosome 10 open reading frame 118 (C10orf118), mRNA [NM_018017]	2.79576e-06	4.15919
A_23_P54116	DAAM1	NM_014992	Homo sapiens dishevelled associated activator of morphogenesis 1 (DAAM1), mRNA [NM_014992]	3.38727e-05	4.14833
A_24_P338648	ARL1	NM_001177	Homo sapiens ADP-ribosylation factor-like 1 (ARL1), mRNA [NM_001177]	5.73655e-08	4.13958
A_23_P171117	MORC4	NM_024657	Homo sapiens MORC family CW-type zinc finger 4 (MORC4), mRNA [NM_024657]	3.81381e-05	4.13898
A_24_P252739	KLF6	NM_001008490	Homo sapiens Kruppel-like factor 6 (KLF6), transcript variant 1, mRNA [NM_001008490]	0.00104499	4.1384
A_24_P915591	COL4A6	BC005305	Homo sapiens collagen, type IV, alpha 6, mRNA (cDNA clone IMAGE:3951220), complete cds. [BC005305]	8.29923e-06	4.13481
A_23_P413184	P18SRP	NM_173829	Homo sapiens P18SRP protein (P18SRP), mRNA [NM_173829]	0.00173607	4.13035
A_24_P340286	RP4-756G23.1	BC068590	Homo sapiens hypothetical protein BC012882, mRNA (cDNA clone IMAGE:4819656), partial cds. [BC068590]	4.12036e-05	4.11736
A_23_P138376	RAB18	NM_021252	Homo sapiens RAB18, member RAS oncogene family (RAB18), mRNA [NM_021252]	0.000600851	4.1156
A_23_P157809	LTB4DH	NM_012212	Homo sapiens leukotriene B4 12-hydroxydehydrogenase (LTB4DH), mRNA [NM_012212]	0.000256993	4.10757
A_23_P11685	PLA2G4A	NM_024420	Homo sapiens phospholipase A2, group IVA (cytosolic, calcium-dependent) (PLA2G4A), mRNA [NM_024420]	0.000946706	4.10708
A_23_P138796	AMOTL1	NM_130847	Homo sapiens angiomotin like 1 (AMOTL1), mRNA [NM_130847]	0.00271278	4.10517
A_32_P12430	SPG20	NM_015087	Homo sapiens spastic paraplegia 20, spartin (Troyer syndrome) (SPG20), mRNA [NM_015087]	3.14859e-06	4.10024
A_24_P141629	FAM111A	NM_022074	Homo sapiens family with sequence similarity 111, member A (FAM111A), transcript variant 1, mRNA [NM_022074]	0.00862054	4.10001
A_23_P97064	FBXO6	NM_018438	Homo sapiens F-box protein 6 (FBXO6), mRNA [NM_018438]	1.21601e-05	4.09897
A_23_P140563	TTC23	NM_022905	Homo sapiens tetratricopeptide repeat domain 23 (TTC23), transcript variant 2, mRNA [NM_022905]	3.17374e-05	4.09242
A_23_P345118	PIM1	NM_002648	Homo sapiens pim-1 oncogene (PIM1), mRNA [NM_002648]	0.0002072	4.08998
A_23_P3368	FURIN	NM_002569	Homo sapiens furin (paired basic amino acid cleaving enzyme) (FURIN), mRNA [NM_002569]	2.91574e-07	4.07832
A_32_P99753	C3orf25	NM_207307	Homo sapiens chromosome 3 open reading frame 25 (C3orf25), mRNA [NM_207307]	0.000828659	4.07829
A_23_P390097	C9orf52	NM_152574	Homo sapiens chromosome 9 open reading frame 52 (C9orf52), mRNA [NM_152574]	0.00213753	4.07567
A_24_P7143	MYO1B	AK022489	Homo sapiens cDNA FLJ12427 fis, clone MAMMA1003127, highly similar to MYOSIN I ALPHA. [AK022489]	0.000724713	4.05864
A_24_P304439	SDS	NM_006843	Homo sapiens serine dehydratase (SDS), mRNA [NM_006843]	1.08277e-07	4.05418
A_23_P403335	EXPH5	NM_015065	Homo sapiens exophilin 5 (EXPH5), mRNA [NM_015065]	0.00986937	4.04941
A_32_P154091	LOC389641	AK124295	Homo sapiens cDNA FLJ42301 fis, clone TOVAR2002514. [AK124295]	1.95002e-09	4.0453
A_23_P60610	CLTB	NM_007097	Homo sapiens clathrin, light polypeptide (Lcb) (CLTB), transcript variant brain, mRNA [NM_007097]	6.19439e-08	4.04434
A_23_P418597	TNKS1BP1	NM_033396	Homo sapiens tankyrase 1 binding protein 1, 182kDa (TNKS1BP1), mRNA [NM_033396]	0.000325341	4.03433
A_23_P302404	RASSF6	NM_201431	Homo sapiens Ras association (RalGDS/AF-6) domain family 6 (RASSF6), transcript variant 2, mRNA [NM_201431]	0.00175035	4.02981
A_23_P254768	HCG4	NR_002139	Homo sapiens HLA complex group 4 (HCG4) on chromosome 6 [NR_002139]	0.00147088	4.02591
A_23_P45304	XK	NM_021083	Homo sapiens X-linked Kx blood group (McLeod syndrome) (XK), mRNA [NM_021083]	0.00299566	4.02525
A_23_P104762	YAP1	NM_006106	Homo sapiens Yes-associated protein 1, 65kDa (YAP1), mRNA [NM_006106]	0.000133647	4.02273
A_23_P17316	C20orf58	NM_152864	Homo sapiens chromosome 20 open reading frame 58 (C20orf58), mRNA [NM_152864]	0.00468094	4.01345
A_23_P258944	DNAJB9	NM_012328	Homo sapiens DnaJ (Hsp40) homolog, subfamily B, member 9 (DNAJB9), mRNA [NM_012328]	0.00299058	4.01002
A_23_P120467	ZFP64	NM_199427	Homo sapiens zinc finger protein 64 homolog (mouse) (ZFP64), transcript variant 4, mRNA [NM_199427]	3.45927e-05	4.00384
A_32_P176911	C14orf72	XM_096733	PREDICTED: Homo sapiens chromosome 14 open reading frame 72 (C14orf72), mRNA [XM_096733]	4.68424e-05	3.99768
A_24_P152188	PRICKLE2	NM_198859	Homo sapiens prickle-like 2 (Drosophila) (PRICKLE2), mRNA [NM_198859]	0.00648171	3.9952
A_23_P145957	TPK1	NM_022445	Homo sapiens thiamin pyrophosphokinase 1 (TPK1), transcript variant 1, mRNA [NM_022445]	1.24357e-06	3.98888
A_24_P148094	LEPROT	NM_017526	Homo sapiens leptin receptor overlapping transcript (LEPROT), mRNA [NM_017526]	2.73855e-07	3.98397
A_23_P138541	AKR1C3	NM_003739	Homo sapiens aldo-keto reductase family 1, member C3 (3-alpha hydroxysteroid dehydrogenase, type II) (AKR1C3), mRNA [NM_003739]	0.00664022	3.97941
A_23_P336992	ZFAND2A	NM_182491	Homo sapiens zinc finger, AN1-type domain 2A (ZFAND2A), mRNA [NM_182491]	0.0094079	3.9744
A_23_P47116	RASSF7	NM_003475	Homo sapiens Ras association (RalGDS/AF-6) domain family 7 (RASSF7), mRNA [NM_003475]	1.7716e-09	3.97196
A_24_P86389	HIST1H2AM	NM_003514	Homo sapiens histone 1, H2am (HIST1H2AM), mRNA [NM_003514]	4.10232e-05	3.97081
A_23_P40347	HM13	NM_178580	Homo sapiens histocompatibility (minor) 13 (HM13), transcript variant 2, mRNA [NM_178580]	0.000803304	3.96998
A_23_P19036	TNIP1	NM_006058	Homo sapiens TNFAIP3 interacting protein 1 (TNIP1), mRNA [NM_006058]	0.000186894	3.95513
A_23_P213385	BASP1	NM_006317	Homo sapiens brain abundant, membrane attached signal protein 1 (BASP1), mRNA [NM_006317]	5.53356e-06	3.95102
A_23_P208369	ITPKC	NM_025194	Homo sapiens inositol 1,4,5-trisphosphate 3-kinase C (ITPKC), mRNA [NM_025194]	4.3881e-06	3.94683
A_32_P114483	C6orf141	NM_153344	Homo sapiens chromosome 6 open reading frame 141 (C6orf141), mRNA [NM_153344]	0.000692941	3.94408
A_23_P211926	WNT5A	NM_003392	Homo sapiens wingless-type MMTV integration site family, member 5A (WNT5A), mRNA [NM_003392]	0.000675461	3.94075
A_23_P31893	ST3GAL1	NM_003033	Homo sapiens ST3 beta-galactoside alpha-2,3-sialyltransferase 1 (ST3GAL1), transcript variant 1, mRNA [NM_003033]	2.39444e-05	3.92117
A_24_P919304	FNDC3B	NM_022763	Homo sapiens fibronectin type III domain containing 3B (FNDC3B), mRNA [NM_022763]	1.67647e-06	3.91911
A_23_P411723	PLAG1	NM_002655	Homo sapiens pleiomorphic adenoma gene 1 (PLAG1), mRNA [NM_002655]	0.000204592	3.91757
A_23_P70867	SBDS	NM_016038	Homo sapiens Shwachman-Bodian-Diamond syndrome (SBDS), mRNA [NM_016038]	0.000241115	3.90153
A_23_P103996	GCLM	NM_002061	Homo sapiens glutamate-cysteine ligase, modifier subunit (GCLM), mRNA [NM_002061]	0.000374613	3.90107
A_23_P141376	PTRF	NM_012232	Homo sapiens polymerase I and transcript release factor (PTRF), mRNA [NM_012232]	0.00227377	3.9009
A_23_P210581	KCNG1	NM_172318	Homo sapiens potassium voltage-gated channel, subfamily G, member 1 (KCNG1), transcript variant 2, mRNA [NM_172318]	0.00674362	3.89937
A_24_P300076	SEMA3F	NM_004186	Homo sapiens sema domain, immunoglobulin domain (Ig), short basic domain, secreted, (semaphorin) 3F (SEMA3F), mRNA [NM_004186]	2.741e-07	3.89795
A_23_P72643	ADAM9	NM_003816	Homo sapiens ADAM metallopeptidase domain 9 (meltrin gamma) (ADAM9), transcript variant 1, mRNA [NM_003816]	2.37313e-07	3.89666
A_23_P109171	BFSP1	NM_001195	Homo sapiens beaded filament structural protein 1, filensin (BFSP1), mRNA [NM_001195]	1.82353e-05	3.88291
A_24_P238578	KIAA1729	BC040874	Homo sapiens KIAA1729 protein, mRNA (cDNA clone IMAGE:5590527). [BC040874]	0.000407594	3.87091
A_23_P34460	SLC35A3	BC005136	Homo sapiens solute carrier family 35 (UDP-N-acetylglucosamine (UDP-GlcNAc) transporter), member A3, mRNA (cDNA clone MGC:1421 IMAGE:3505772), complete cds. [BC005136]	5.69101e-06	3.86966
A_24_P301146	LMO7	NM_005358	Homo sapiens LIM domain 7 (LMO7), mRNA [NM_005358]	0.00312921	3.86822
A_23_P120941	ATF4	NM_001675	Homo sapiens activating transcription factor 4 (tax-responsive enhancer element B67) (ATF4), transcript variant 1, mRNA [NM_001675]	0.000147091	3.86742
A_23_P380614	ATP9A	NM_006045	Homo sapiens ATPase, Class II, type 9A (ATP9A), mRNA [NM_006045]	6.31819e-05	3.85855
A_23_P50349	TRIP10	NM_004240	Homo sapiens thyroid hormone receptor interactor 10 (TRIP10), mRNA [NM_004240]	0.000545628	3.84724
A_24_P751074	ETS1	NM_005238	Homo sapiens v-ets erythroblastosis virus E26 oncogene homolog 1 (avian) (ETS1), mRNA [NM_005238]	7.64808e-05	3.84493
A_23_P375494	CEBPA	NM_004364	Homo sapiens CCAAT/enhancer binding protein (C/EBP), alpha (CEBPA), mRNA [NM_004364]	0.00217861	3.84391
A_23_P53588	WNT5B	NM_030775	Homo sapiens wingless-type MMTV integration site family, member 5B (WNT5B), transcript variant 2, mRNA [NM_030775]	0.000710587	3.84083
A_32_P123088	TICAM2	NM_021649	Homo sapiens toll-like receptor adaptor molecule 2 (TICAM2), mRNA [NM_021649]	0.000225279	3.8347
A_23_P218463	SERTAD1	NM_013376	Homo sapiens SERTA domain containing 1 (SERTAD1), mRNA [NM_013376]	0.000434852	3.83352
A_23_P218190	CAPN3	NM_000070	Homo sapiens calpain 3, (p94) (CAPN3), transcript variant 1, mRNA [NM_000070]	0.000218085	3.81752
A_23_P364792	CYorf15A	NM_001005852	Homo sapiens chromosome Y open reading frame 15A (CYorf15A), mRNA [NM_001005852]	0.00047897	3.81542
A_23_P91829	DCBLD2	NM_080927	Homo sapiens discoidin, CUB and LCCL domain containing 2 (DCBLD2), mRNA [NM_080927]	0.00802313	3.81125
A_24_P339611	PDCD5	NM_004708	Homo sapiens programmed cell death 5 (PDCD5), mRNA [NM_004708]	0.000100701	3.80761
A_32_P919718	TMEM105	NM_178520	Homo sapiens transmembrane protein 105 (TMEM105), mRNA [NM_178520]	0.00732722	3.80301
A_23_P211141	DSCAM	NM_001389	Homo sapiens Down syndrome cell adhesion molecule (DSCAM), transcript variant 1, mRNA [NM_001389]	0.000137235	3.7991
A_23_P214779	UTRN	NM_007124	Homo sapiens utrophin (homologous to dystrophin) (UTRN), mRNA [NM_007124]	0.000539995	3.79452
A_23_P202199	SLK	NM_014720	Homo sapiens STE20-like kinase (yeast) (SLK), mRNA [NM_014720]	1.85715e-06	3.79195
A_24_P928052	NRP1	NM_003873	Homo sapiens neuropilin 1 (NRP1), transcript variant 1, mRNA [NM_003873]	0.00333326	3.78788
A_23_P166421	TBC1D10A	NM_031937	Homo sapiens TBC1 domain family, member 10A (TBC1D10A), mRNA [NM_031937]	2.42198e-07	3.78489
A_23_P119102	VASP	NM_003370	Homo sapiens vasodilator-stimulated phosphoprotein (VASP), transcript variant 1, mRNA [NM_003370]	1.26345e-07	3.78327
A_23_P156289	OSMR	BC010943	Homo sapiens oncostatin M receptor, mRNA (cDNA clone IMAGE:4043935), complete cds. [BC010943]	2.26289e-05	3.78244
A_23_P7896	DUSP22	NM_020185	Homo sapiens dual specificity phosphatase 22 (DUSP22), mRNA [NM_020185]	0.00193015	3.78118
A_24_P400760	LOC643454	XM_937375	PREDICTED: Homo sapiens similar to Adapter-related protein complex 3 sigma 1 subunit (Sigma-adaptin 3a) (AP-3 complex sigma-3A subunit) (Sigma-3A-adaptin) (LOC648320), mRNA [XM_937375]	4.07551e-05	3.77775
A_24_P398319	TMEM9B	NM_020644	Homo sapiens TMEM9 domain family, member B (TMEM9B), mRNA [NM_020644]	2.30005e-08	3.77752
A_23_P140928	TMC7	NM_024847	Homo sapiens transmembrane channel-like 7 (TMC7), mRNA [NM_024847]	6.05494e-07	3.77293
A_23_P49816	CENTA2	NM_018404	Homo sapiens centaurin, alpha 2 (CENTA2), mRNA [NM_018404]	0.00018881	3.77008
A_32_P78816	PSPH	NM_004577	Homo sapiens phosphoserine phosphatase (PSPH), mRNA [NM_004577]	0.00158913	3.75271
A_23_P164313	MINK1	NM_153827	Homo sapiens misshapen-like kinase 1 (zebrafish) (MINK1), transcript variant 3, mRNA [NM_153827]	6.03143e-08	3.74721
A_23_P387856	NEDD4L	NM_015277	Homo sapiens neural precursor cell expressed, developmentally down-regulated 4-like (NEDD4L), mRNA [NM_015277]	9.89144e-05	3.74518
A_23_P99906	HOMER2	NM_199330	Homo sapiens homer homolog 2 (Drosophila) (HOMER2), transcript variant 2, mRNA [NM_199330]	0.00574163	3.73981
A_24_P124567	ORMDL2	NM_014182	Homo sapiens ORM1-like 2 (S. cerevisiae) (ORMDL2), mRNA [NM_014182]	0.000204348	3.73098
A_23_P169007	NPM2	NM_182795	Homo sapiens nucleophosmin/nucleoplasmin, 2 (NPM2), mRNA [NM_182795]	7.39334e-05	3.73092
A_24_P331727	TMED7	NM_181836	Homo sapiens transmembrane emp24 protein transport domain containing 7 (TMED7), mRNA [NM_181836]	4.76487e-05	3.72634
A_23_P25336	GLTP	NM_016433	Homo sapiens glycolipid transfer protein (GLTP), mRNA [NM_016433]	8.78787e-05	3.71575
A_24_P929754	MKNK2	NM_199054	Homo sapiens MAP kinase interacting serine/threonine kinase 2 (MKNK2), transcript variant 2, mRNA [NM_199054]	0.00199898	3.70492
A_23_P25706	CLMN	NM_024734	Homo sapiens calmin (calponin-like, transmembrane) (CLMN), mRNA [NM_024734]	0.00142452	3.70418
A_23_P137434	RNF11	NM_014372	Homo sapiens ring finger protein 11 (RNF11), mRNA [NM_014372]	0.000554643	3.7003
A_23_P218079	SLC38A2	NM_018976	Homo sapiens solute carrier family 38, member 2 (SLC38A2), mRNA [NM_018976]	0.000149314	3.69978
A_23_P376759	DUSP11	NM_003584	Homo sapiens dual specificity phosphatase 11 (RNA/RNP complex 1-interacting) (DUSP11), mRNA [NM_003584]	8.34956e-05	3.69953
A_23_P15394	CD68	NM_001251	Homo sapiens CD68 molecule (CD68), transcript variant 1, mRNA [NM_001251]	0.00108999	3.68911
A_23_P40088	DDEF2	NM_003887	Homo sapiens development and differentiation enhancing factor 2 (DDEF2), mRNA [NM_003887]	1.77062e-05	3.68877
A_23_P36962	DNAJC3	NM_006260	Homo sapiens DnaJ (Hsp40) homolog, subfamily C, member 3 (DNAJC3), mRNA [NM_006260]	0.00230494	3.6884
A_23_P200801	PDE4DIP	AB042555	Homo sapiens mRNA, similar to rat myomegalin, complete cds. [AB042555]	2.80299e-07	3.67775
A_24_P307827	WHDC1	AK126887	Homo sapiens cDNA FLJ44939 fis, clone BRAMY3018754, weakly similar to Mus musculus junction-mediating and regulatory protein (Jmy-pending). [AK126887]	0.00020228	3.67637
A_23_P63816	NRBF2	NM_030759	Homo sapiens nuclear receptor binding factor 2 (NRBF2), mRNA [NM_030759]	0.00994143	3.67089
A_23_P143935	PIGZ	NM_025163	Homo sapiens phosphatidylinositol glycan, class Z (PIGZ), mRNA [NM_025163]	0.000671537	3.67016
A_23_P159764	POF1B	NM_024921	Homo sapiens premature ovarian failure, 1B (POF1B), mRNA [NM_024921]	0.000316502	3.66907
A_23_P43476	VLDLR	NM_003383	Homo sapiens very low density lipoprotein receptor (VLDLR), transcript variant 1, mRNA [NM_003383]	0.00124101	3.66729
A_23_P2705	P2RY5	NM_005767	Homo sapiens purinergic receptor P2Y, G-protein coupled, 5 (P2RY5), mRNA [NM_005767]	0.00136979	3.66428
A_24_P260134	NMNAT3	NM_178177	Homo sapiens nicotinamide nucleotide adenylyltransferase 3 (NMNAT3), mRNA [NM_178177]	0.00372256	3.65672
A_23_P102113	WNT10A	NM_025216	Homo sapiens wingless-type MMTV integration site family, member 10A (WNT10A), mRNA [NM_025216]	0.00902406	3.65396
A_23_P25581	LIG4	NM_002312	Homo sapiens ligase IV, DNA, ATP-dependent (LIG4), transcript variant 1, mRNA [NM_002312]	0.000493325	3.65261
A_24_P683917	FLNB	AK022486	Homo sapiens cDNA FLJ12424 fis, clone MAMMA1003099. [AK022486]	0.000251777	3.65165
A_24_P199097	TOMM34	NM_006809	Homo sapiens translocase of outer mitochondrial membrane 34 (TOMM34), nuclear gene encoding mitochondrial protein, mRNA [NM_006809]	0.000138377	3.65005
A_24_P333663	MAPK6	NM_002748	Homo sapiens mitogen-activated protein kinase 6 (MAPK6), mRNA [NM_002748]	0.0037318	3.6456
A_23_P158041	AQP7	NM_001170	Homo sapiens aquaporin 7 (AQP7), mRNA [NM_001170]	0.000377107	3.64543
A_23_P124190	TRIM34	NM_130390	Homo sapiens tripartite motif-containing 34 (TRIM34), transcript variant 3, mRNA [NM_130390]	4.6064e-05	3.64285
A_24_P385313	PTPRF	NM_002840	Homo sapiens protein tyrosine phosphatase, receptor type, F (PTPRF), transcript variant 1, mRNA [NM_002840]	1.95849e-06	3.64167
A_23_P252903	SIL1	NM_022464	Homo sapiens SIL1 homolog, endoplasmic reticulum chaperone (S. cerevisiae) (SIL1), transcript variant 2, mRNA [NM_022464]	8.68072e-05	3.63758
A_24_P204244	ANXA2P1	NR_001562	Homo sapiens annexin A2 pseudogene 1 (ANXA2P1) on chromosome 4 [NR_001562]	0.00184539	3.63629
A_24_P42603	TRIO	NM_007118	Homo sapiens triple functional domain (PTPRF interacting) (TRIO), mRNA [NM_007118]	5.41584e-08	3.63301
A_23_P200325	RABGAP1L	AB007940	Homo sapiens mRNA for KIAA0471 protein, partial cds. [AB007940]	0.000815481	3.6322
A_23_P133665	FRK	NM_002031	Homo sapiens fyn-related kinase (FRK), mRNA [NM_002031]	8.1562e-05	3.6295
A_23_P53198	DGAT2	NM_032564	Homo sapiens diacylglycerol O-acyltransferase homolog 2 (mouse) (DGAT2), mRNA [NM_032564]	0.00383869	3.62797
A_24_P135344	RICS	NM_014715	Homo sapiens Rho GTPase-activating protein (RICS), mRNA [NM_014715]	0.00275764	3.62592
A_23_P3532	LITAF	NM_004862	Homo sapiens lipopolysaccharide-induced TNF factor (LITAF), mRNA [NM_004862]	0.000110443	3.62209
A_24_P183292	CSNK1A1	NM_001892	Homo sapiens casein kinase 1, alpha 1 (CSNK1A1), transcript variant 2, mRNA [NM_001892]	0.00110722	3.61516
A_23_P250274	LRRC8A	NM_019594	Homo sapiens leucine rich repeat containing 8 family, member A (LRRC8A), mRNA [NM_019594]	2.12145e-08	3.61088
A_24_P108301	RTTN	NM_173630	Homo sapiens rotatin (RTTN), mRNA [NM_173630]	0.000167148	3.60301
A_24_P23546	SP8	NM_198956	Homo sapiens Sp8 transcription factor (SP8), transcript variant 2, mRNA [NM_198956]	0.00259415	3.59834
A_24_P48078	CYLD	NM_015247	Homo sapiens cylindromatosis (turban tumor syndrome) (CYLD), transcript variant 1, mRNA [NM_015247]	1.32679e-05	3.59815
A_23_P30736	HLA-DOB	NM_002120	Homo sapiens major histocompatibility complex, class II, DO beta (HLA-DOB), mRNA [NM_002120]	0.00590834	3.59804
A_23_P422732	WDR63	NM_145172	Homo sapiens WD repeat domain 63 (WDR63), mRNA [NM_145172]	1.89367e-05	3.5963
A_24_P179407	FGD6	NM_018351	Homo sapiens FYVE, RhoGEF and PH domain containing 6 (FGD6), mRNA [NM_018351]	0.000164638	3.59466
A_24_P62860	STAM2	NM_005843	Homo sapiens signal transducing adaptor molecule (SH3 domain and ITAM motif) 2 (STAM2), mRNA [NM_005843]	0.00244811	3.59337
A_23_P218685	Kua-UEV	NM_199203	Homo sapiens ubiquitin-conjugating enzyme E2 variant 1 (Kua-UEV), transcript variant 1, mRNA [NM_199203]	7.49943e-05	3.58942
A_23_P417113	PRR8	BC011923	Homo sapiens proline rich 8, mRNA (cDNA clone MGC:20460 IMAGE:4542314), complete cds. [BC011923]	3.82335e-05	3.58655
A_23_P16944	SDC1	NM_001006946	Homo sapiens syndecan 1 (SDC1), transcript variant 1, mRNA [NM_001006946]	0.00240233	3.58324
A_23_P10927	TM2D2	NM_031940	Homo sapiens TM2 domain containing 2 (TM2D2), transcript variant 2, mRNA [NM_031940]	0.000169432	3.57879
A_23_P26426	CPNE7	NM_014427	Homo sapiens copine VII (CPNE7), transcript variant 2, mRNA [NM_014427]	0.00129806	3.57842
A_23_P97700	TXNIP	NM_006472	Homo sapiens thioredoxin interacting protein (TXNIP), mRNA [NM_006472]	0.000341592	3.57743
A_23_P339818	ARRDC4	NM_183376	Homo sapiens arrestin domain containing 4 (ARRDC4), mRNA [NM_183376]	0.00400171	3.57507
A_23_P24384	CCDC88	AK095289	Homo sapiens cDNA FLJ37970 fis, clone CTONG2009955. [AK095289]	0.000612769	3.56523
A_23_P206899	TMEM159	NM_020422	Homo sapiens transmembrane protein 159 (TMEM159), mRNA [NM_020422]	0.000430945	3.56291
A_23_P144054	PRKCD	NM_006254	Homo sapiens protein kinase C, delta (PRKCD), transcript variant 1, mRNA [NM_006254]	0.000592137	3.5611
A_23_P135079	SARDH	NM_007101	Homo sapiens sarcosine dehydrogenase (SARDH), mRNA [NM_007101]	0.0032694	3.55968
A_23_P71480	DEFB1	NM_005218	Homo sapiens defensin, beta 1 (DEFB1), mRNA [NM_005218]	0.00493533	3.54989
A_24_P100130	BCL2L1	NM_001191	Homo sapiens BCL2-like 1 (BCL2L1), nuclear gene encoding mitochondrial protein, transcript variant 2, mRNA [NM_001191]	0.00239821	3.54935
A_23_P41390	SH3TC1	NM_018986	Homo sapiens SH3 domain and tetratricopeptide repeats 1 (SH3TC1), mRNA [NM_018986]	6.19445e-07	3.5464
A_23_P64102	RIN1	NM_004292	Homo sapiens Ras and Rab interactor 1 (RIN1), mRNA [NM_004292]	0.00221785	3.5431
A_23_P26847	SOX9	NM_000346	Homo sapiens SRY (sex determining region Y)-box 9 (campomelic dysplasia, autosomal sex-reversal) (SOX9), mRNA [NM_000346]	0.000331678	3.53938
A_24_P163920	MLSTD2	NM_032228	Homo sapiens male sterility domain containing 2 (MLSTD2), mRNA [NM_032228]	0.000398988	3.53575
A_23_P13222	RCN1	NM_002901	Homo sapiens reticulocalbin 1, EF-hand calcium binding domain (RCN1), mRNA [NM_002901]	0.000712421	3.53497
A_23_P78018	ABCA5	NM_018672	Homo sapiens ATP-binding cassette, sub-family A (ABC1), member 5 (ABCA5), transcript variant 1, mRNA [NM_018672]	4.59717e-05	3.52734
A_23_P139722	TNFRSF1A	NM_001065	Homo sapiens tumor necrosis factor receptor superfamily, member 1A (TNFRSF1A), mRNA [NM_001065]	3.21545e-07	3.51655
A_23_P16817	CLK1	NM_004071	Homo sapiens CDC-like kinase 1 (CLK1), transcript variant 1, mRNA [NM_004071]	0.00946943	3.51515
A_23_P54223	RABGGTA	NM_004581	Homo sapiens Rab geranylgeranyltransferase, alpha subunit (RABGGTA), transcript variant 2, mRNA [NM_004581]	4.9227e-06	3.51257
A_23_P122052	LOC493869	NM_001008397	Homo sapiens similar to RIKEN cDNA 2310016C16 (LOC493869), mRNA [NM_001008397]	1.19226e-05	3.51133
A_23_P62070	SLC6A19	AK096054	Homo sapiens cDNA FLJ38735 fis, clone KIDNE2010973, moderately similar to Mus musculus orphan transporter isoform B9 (Xtrp2) mRNA. [AK096054]	4.6343e-05	3.50984
A_23_P150064	MMRN2	NM_024756	Homo sapiens multimerin 2 (MMRN2), mRNA [NM_024756]	0.000856142	3.50163
A_23_P332316	ARRDC1	NM_152285	Homo sapiens arrestin domain containing 1 (ARRDC1), mRNA [NM_152285]	2.21492e-05	3.50121
A_23_P212179	HRH1	NM_000861	Homo sapiens histamine receptor H1 (HRH1), mRNA [NM_000861]	9.56871e-06	3.49894
A_23_P166	MOBKL2C	NM_145279	Homo sapiens MOB1, Mps One Binder kinase activator-like 2C (yeast) (MOBKL2C), transcript variant 1, mRNA [NM_145279]	0.000264391	3.49571
A_23_P63026	LGALS8	NM_006499	Homo sapiens lectin, galactoside-binding, soluble, 8 (galectin 8) (LGALS8), transcript variant 1, mRNA [NM_006499]	9.88688e-10	3.49247
A_24_P134816	BCL9L	NM_182557	Homo sapiens B-cell CLL/lymphoma 9-like (BCL9L), mRNA [NM_182557]	4.8947e-06	3.49134
A_24_P194068	PLEKHF1	NM_024310	Homo sapiens pleckstrin homology domain containing, family F (with FYVE domain) member 1 (PLEKHF1), mRNA [NM_024310]	0.00108463	3.48552
A_23_P435501	SERINC3	NM_198941	Homo sapiens serine incorporator 3 (SERINC3), transcript variant 2, mRNA [NM_198941]	0.000722899	3.48399
A_23_P14612	FGF7	NM_002009	Homo sapiens fibroblast growth factor 7 (keratinocyte growth factor) (FGF7), mRNA [NM_002009]	0.000626993	3.48377
A_23_P339582	CXorf38	NM_144970	Homo sapiens chromosome X open reading frame 38 (CXorf38), mRNA [NM_144970]	2.3964e-06	3.47963
A_24_P354689	SPOCK1	NM_004598	Homo sapiens sparc/osteonectin, cwcv and kazal-like domains proteoglycan (testican) 1 (SPOCK1), mRNA [NM_004598]	0.00575708	3.47912
A_24_P5856	TNFSF9	NM_003811	Homo sapiens tumor necrosis factor (ligand) superfamily, member 9 (TNFSF9), mRNA [NM_003811]	0.00276134	3.47886
A_32_P162150	MAP3K7IP3	NM_152787	Homo sapiens mitogen-activated protein kinase kinase kinase 7 interacting protein 3 (MAP3K7IP3), mRNA [NM_152787]	2.46809e-07	3.47665
A_24_P823708	FAM91A2	BC021732	Homo sapiens cDNA clone IMAGE:4795401. [BC021732]	0.00010019	3.47322
A_23_P416894	LOC54103	AK126364	Homo sapiens cDNA FLJ44400 fis, clone TSTOM2002561. [AK126364]	0.00195822	3.47195
A_23_P363769	KRT86	NM_002284	Homo sapiens keratin, hair, basic, 6 (monilethrix) (KRTHB6), mRNA [NM_002284]	6.14223e-05	3.47144
A_23_P30363	P4HA2	NM_004199	Homo sapiens procollagen-proline, 2-oxoglutarate 4-dioxygenase (proline 4-hydroxylase), alpha polypeptide II (P4HA2), transcript variant 1, mRNA [NM_004199]	7.46802e-06	3.47072
A_24_P330773	CALCOCO2	NM_005831	Homo sapiens calcium binding and coiled-coil domain 2 (CALCOCO2), mRNA [NM_005831]	0.0062962	3.46988
A_24_P380536	CD164	NM_006016	Homo sapiens CD164 molecule, sialomucin (CD164), mRNA [NM_006016]	0.000992185	3.46761
A_24_P46417	STK10	NM_005990	Homo sapiens serine/threonine kinase 10 (STK10), mRNA [NM_005990]	0.000499302	3.46656
A_23_P80778	DIRC2	NM_032839	Homo sapiens disrupted in renal carcinoma 2 (DIRC2), mRNA [NM_032839]	0.000169941	3.45657
A_23_P215819	ZNF655	NM_001009956	Homo sapiens zinc finger protein 655 (ZNF655), transcript variant 6, mRNA [NM_001009956]	0.0052829	3.45612
A_23_P26815	RILP	NM_031430	Homo sapiens Rab interacting lysosomal protein (RILP), mRNA [NM_031430]	1.67166e-05	3.45167
A_23_P201939	PPM1J	NM_005167	Homo sapiens protein phosphatase 1J (PP2C domain containing) (PPM1J), mRNA [NM_005167]	3.4074e-05	3.44524
A_23_P139260	SLC22A18	NM_183233	Homo sapiens solute carrier family 22 (organic cation transporter), member 18 (SLC22A18), transcript variant 2, mRNA [NM_183233]	0.00595607	3.44107
A_24_P283288	MAPK14	NM_139013	Homo sapiens mitogen-activated protein kinase 14 (MAPK14), transcript variant 3, mRNA [NM_139013]	3.48696e-05	3.44027
A_23_P143867	TMF1	NM_007114	Homo sapiens TATA element modulatory factor 1 (TMF1), mRNA [NM_007114]	0.000213246	3.43664
A_24_P44514	CIB1	NM_006384	Homo sapiens calcium and integrin binding 1 (calmyrin) (CIB1), mRNA [NM_006384]	8.22807e-06	3.43569
A_32_P70818	PAX9	U59628	Human PAX-9 mRNA, partial cds. [U59628]	5.79163e-05	3.42725
A_24_P349466	PRR13	NM_001005354	Homo sapiens proline rich 13 (PRR13), transcript variant 3, mRNA [NM_001005354]	0.001089	3.41323
A_23_P120270	MCFD2	NM_139279	Homo sapiens multiple coagulation factor deficiency 2 (MCFD2), mRNA [NM_139279]	0.000217591	3.4125
A_23_P32175	LHX6	NM_014368	Homo sapiens LIM homeobox 6 (LHX6), transcript variant 1, mRNA [NM_014368]	0.0005434	3.41114
A_23_P252201	EAF2	NM_018456	Homo sapiens ELL associated factor 2 (EAF2), mRNA [NM_018456]	1.85911e-06	3.41109
A_23_P158596	AGTRAP	NM_020350	Homo sapiens angiotensin II receptor-associated protein (AGTRAP), transcript variant 1, mRNA [NM_020350]	2.21673e-05	3.41059
A_32_P231568	RASEF	AK056176	Homo sapiens cDNA FLJ31614 fis, clone NT2RI2002970. [AK056176]	8.13522e-05	3.41052
A_32_P57057	USP15	NM_006313	Homo sapiens ubiquitin specific peptidase 15 (USP15), mRNA [NM_006313]	2.07465e-05	3.40871
A_24_P405552	SERP1	NM_014445	Homo sapiens stress-associated endoplasmic reticulum protein 1 (SERP1), mRNA [NM_014445]	0.00914226	3.40526
A_23_P300867	MIPOL1	NM_138731	Homo sapiens mirror-image polydactyly 1 (MIPOL1), mRNA [NM_138731]	0.000503195	3.4049
A_23_P12514	RHOC	NM_175744	Homo sapiens ras homolog gene family, member C (RHOC), mRNA [NM_175744]	6.41683e-05	3.40228
A_24_P261383	JOSD3	NM_024116	Homo sapiens Josephin domain containing 3 (JOSD3), mRNA [NM_024116]	0.00361545	3.40094
A_23_P328259	KIAA1727	NM_033393	Homo sapiens KIAA1727 protein (KIAA1727), mRNA [NM_033393]	0.000486672	3.3984
A_23_P209669	NRP2	NM_201264	Homo sapiens neuropilin 2 (NRP2), transcript variant 6, mRNA [NM_201264]	0.00467311	3.3956
A_23_P35791	RPS6KA4	NM_003942	Homo sapiens ribosomal protein S6 kinase, 90kDa, polypeptide 4 (RPS6KA4), transcript variant 1, mRNA [NM_003942]	1.52024e-05	3.39366
A_23_P27827	ZBTB7A	AL390151	Homo sapiens mRNA; cDNA DKFZp547O146 (from clone DKFZp547O146). [AL390151]	8.32931e-07	3.38778
A_23_P408473	KIAA1833	AL834145	Homo sapiens mRNA; cDNA DKFZp434P167 (from clone DKFZp434P167). [AL834145]	1.04863e-06	3.38141
A_23_P83388	EPPK1	NM_031308	Homo sapiens epiplakin 1 (EPPK1), mRNA [NM_031308]	0.000842318	3.38068
A_32_P143377	TMEM30B	NM_001017970	Homo sapiens transmembrane protein 30B (TMEM30B), mRNA [NM_001017970]	2.69245e-09	3.37773
A_23_P86002	TMED5	NM_016040	Homo sapiens transmembrane emp24 protein transport domain containing 5 (TMED5), mRNA [NM_016040]	0.0022287	3.37405
A_23_P115286	BCL10	NM_003921	Homo sapiens B-cell CLL/lymphoma 10 (BCL10), mRNA [NM_003921]	0.00320424	3.37357
A_24_P243329	ITGA2	NM_002203	Homo sapiens integrin, alpha 2 (CD49B, alpha 2 subunit of VLA-2 receptor) (ITGA2), mRNA [NM_002203]	0.00621035	3.36789
A_32_P201773	AMMECR1	NM_015365	Homo sapiens Alport syndrome, mental retardation, midface hypoplasia and elliptocytosis chromosomal region, gene 1 (AMMECR1), transcript variant 1, mRNA [NM_015365]	0.00544678	3.36615
A_23_P207999	PMAIP1	NM_021127	Homo sapiens phorbol-12-myristate-13-acetate-induced protein 1 (PMAIP1), mRNA [NM_021127]	0.00156732	3.36527
A_23_P338890	PTPN1	NM_002827	Homo sapiens protein tyrosine phosphatase, non-receptor type 1 (PTPN1), mRNA [NM_002827]	5.45995e-05	3.36467
A_23_P351757	PLCD3	NM_133373	Homo sapiens phospholipase C, delta 3 (PLCD3), mRNA [NM_133373]	2.33991e-05	3.36217
A_23_P103571	MAN1A2	NM_006699	Homo sapiens mannosidase, alpha, class 1A, member 2 (MAN1A2), mRNA [NM_006699]	0.0010042	3.36106
A_23_P89570	ZMYND15	NM_032265	Homo sapiens zinc finger, MYND-type containing 15 (ZMYND15), mRNA [NM_032265]	0.00131433	3.35097
A_24_P243633	DCBLD1	NM_173674	Homo sapiens discoidin, CUB and LCCL domain containing 1 (DCBLD1), mRNA [NM_173674]	1.7132e-06	3.34988
A_24_P365506	C20orf42	AK025365	Homo sapiens cDNA: FLJ21712 fis, clone COL10231. [AK025365]	0.00108638	3.34525
A_24_P340066	ELF4	NM_001421	Homo sapiens E74-like factor 4 (ets domain transcription factor) (ELF4), mRNA [NM_001421]	3.46161e-07	3.34286
A_23_P257131	PEX13	NM_002618	Homo sapiens peroxisome biogenesis factor 13 (PEX13), mRNA [NM_002618]	0.000886827	3.34259
A_23_P92161	ARL14	NM_025047	Homo sapiens ADP-ribosylation factor-like 14 (ARL14), mRNA [NM_025047]	0.000145885	3.33656
A_23_P106145	ERO1L	NM_014584	Homo sapiens ERO1-like (S. cerevisiae) (ERO1L), mRNA [NM_014584]	0.0045705	3.33594
A_23_P303260	STX7	NM_003569	Homo sapiens syntaxin 7 (STX7), mRNA [NM_003569]	1.79688e-05	3.33361
A_23_P119502	EDG6	NM_003775	Homo sapiens endothelial differentiation, lysophosphatidic acid G-protein-coupled receptor, 6 (EDG6), mRNA [NM_003775]	0.00178584	3.33189
A_23_P41765	IRF1	NM_002198	Homo sapiens interferon regulatory factor 1 (IRF1), mRNA [NM_002198]	1.16594e-05	3.32847
A_23_P313389	UGCG	NM_003358	Homo sapiens UDP-glucose ceramide glucosyltransferase (UGCG), mRNA [NM_003358]	0.00203883	3.3259
A_24_P233256	ZNF649	NM_023074	Homo sapiens zinc finger protein 649 (ZNF649), mRNA [NM_023074]	2.14812e-05	3.32542
A_23_P309207	ZNF577	NM_032679	Homo sapiens zinc finger protein 577 (ZNF577), mRNA [NM_032679]	1.71222e-05	3.32416
A_23_P250994	ANAPC10	NM_014885	Homo sapiens anaphase promoting complex subunit 10 (ANAPC10), mRNA [NM_014885]	5.02502e-06	3.32136
A_23_P148949	SPRR2B	NM_001017418	Homo sapiens small proline-rich protein 2B (SPRR2B), mRNA [NM_001017418]	8.07579e-05	3.30869
A_23_P62768	TMEM54	NM_033504	Homo sapiens transmembrane protein 54 (TMEM54), mRNA [NM_033504]	3.14783e-06	3.30615
A_32_P41065	TMCC1	NM_001017395	Homo sapiens transmembrane and coiled-coil domain family 1 (TMCC1), transcript variant 1, mRNA [NM_001017395]	7.48496e-05	3.30417
A_23_P4425	FLII	NM_002018	Homo sapiens flightless I homolog (Drosophila) (FLII), mRNA [NM_002018]	0.00137835	3.30207
A_23_P369899	TMEM158	NM_015444	Homo sapiens transmembrane protein 158 (TMEM158), mRNA [NM_015444]	0.00290943	3.297
A_24_P233917	KIAA0494	NM_014774	Homo sapiens KIAA0494 (KIAA0494), mRNA [NM_014774]	2.36593e-07	3.29502
A_23_P131771	TPD52L2	NM_199360	Homo sapiens tumor protein D52-like 2 (TPD52L2), transcript variant 1, mRNA [NM_199360]	0.00821859	3.29221
A_23_P16110	OR7E24	NR_002146	Homo sapiens olfactory receptor, family 7, subfamily E, member 24 (OR7E24) on chromosome 19 [NR_002146]	0.00330674	3.28376
A_23_P218928	C4orf18	NM_016613	Homo sapiens chromosome 4 open reading frame 18 (C4orf18), transcript variant 2, mRNA [NM_016613]	0.00466324	3.28088
A_23_P94921	SLC20A2	NM_006749	Homo sapiens solute carrier family 20 (phosphate transporter), member 2 (SLC20A2), mRNA [NM_006749]	0.00564936	3.27926
A_23_P383986	GALNAC4S-6ST	NM_015892	Homo sapiens B cell RAG associated protein (GALNAC4S-6ST), mRNA [NM_015892]	0.00794583	3.27777
A_23_P415006	RAB11FIP5	NM_015470	Homo sapiens RAB11 family interacting protein 5 (class I) (RAB11FIP5), mRNA [NM_015470]	3.30384e-06	3.27656
A_24_P917280	ALDH1A3	BC009245	Homo sapiens aldehyde dehydrogenase 1 family, member A3, mRNA (cDNA clone IMAGE:2960240), complete cds. [BC009245]	0.00358509	3.27392
A_24_P174755	SLC22A5	NM_003060	Homo sapiens solute carrier family 22 (organic cation transporter), member 5 (SLC22A5), mRNA [NM_003060]	1.26232e-06	3.27254
A_23_P138760	CLCF1	NM_013246	Homo sapiens cardiotrophin-like cytokine factor 1 (CLCF1), mRNA [NM_013246]	0.000541482	3.27219
A_23_P141342	ARHGAP27	NM_199282	Homo sapiens Rho GTPase activating protein 27 (ARHGAP27), mRNA [NM_199282]	0.00113698	3.27106
A_23_P430120	EPAS1	NM_001430	Homo sapiens endothelial PAS domain protein 1 (EPAS1), mRNA [NM_001430]	0.000223195	3.26999
A_24_P396650	RPS6KA1	NM_002953	Homo sapiens ribosomal protein S6 kinase, 90kDa, polypeptide 1 (RPS6KA1), transcript variant 1, mRNA [NM_002953]	0.000830106	3.26861
A_23_P66085	N4BP1	NM_153029	Homo sapiens Nedd4 binding protein 1 (N4BP1), mRNA [NM_153029]	1.45764e-05	3.2681
A_24_P17490	CNTN3	NM_020872	Homo sapiens contactin 3 (plasmacytoma associated) (CNTN3), mRNA [NM_020872]	0.000394214	3.26803
A_32_P89755	SSR1	NM_003144	Homo sapiens signal sequence receptor, alpha (translocon-associated protein alpha) (SSR1), mRNA [NM_003144]	6.27138e-05	3.26707
A_24_P118892	IRF7	NM_004029	Homo sapiens interferon regulatory factor 7 (IRF7), transcript variant b, mRNA [NM_004029]	0.000706498	3.26566
A_23_P211504	KDELR3	NM_016657	Homo sapiens KDEL (Lys-Asp-Glu-Leu) endoplasmic reticulum protein retention receptor 3 (KDELR3), transcript variant 2, mRNA [NM_016657]	0.00112521	3.26277
A_32_P174365	SATB2	AK025127	Homo sapiens cDNA: FLJ21474 fis, clone COL04941. [AK025127]	1.0941e-06	3.26242
A_23_P77552	RAB43	NM_198490	Homo sapiens RAB43, member RAS oncogene family (RAB43), mRNA [NM_198490]	0.00356265	3.25823
A_23_P132763	VGLL3	NM_016206	Homo sapiens vestigial like 3 (Drosophila) (VGLL3), mRNA [NM_016206]	7.18291e-06	3.25761
A_23_P120056	RTKN	NM_033046	Homo sapiens rhotekin (RTKN), transcript variant 2, mRNA [NM_033046]	0.000860199	3.25402
A_23_P127117	CCDC6	NM_005436	Homo sapiens coiled-coil domain containing 6 (CCDC6), mRNA [NM_005436]	0.000567328	3.25237
A_24_P13381	TRPV4	NM_147204	Homo sapiens transient receptor potential cation channel, subfamily V, member 4 (TRPV4), transcript variant 2, mRNA [NM_147204]	0.00140039	3.25088
A_23_P102454	INSIG2	NM_016133	Homo sapiens insulin induced gene 2 (INSIG2), mRNA [NM_016133]	6.32926e-05	3.24777
A_23_P120566	RRBP1	NM_004587	Homo sapiens ribosome binding protein 1 homolog 180kDa (dog) (RRBP1), mRNA [NM_004587]	2.89132e-05	3.24254
A_23_P153529	TRPM4	NM_017636	Homo sapiens transient receptor potential cation channel, subfamily M, member 4 (TRPM4), mRNA [NM_017636]	3.76465e-05	3.23818
A_32_P175301	DENND3	AK058001	Homo sapiens cDNA FLJ25272 fis, clone STM05694. [AK058001]	0.000121734	3.23493
A_24_P305938	RAB9P1	NR_000039	Homo sapiens RAB9, member RAS oncogene family, pseudogene 1 (RAB9P1) on chromosome 5 [NR_000039]	0.00331275	3.23248
A_23_P212339	FYCO1	NM_024513	Homo sapiens FYVE and coiled-coil domain containing 1 (FYCO1), mRNA [NM_024513]	1.87814e-05	3.23219
A_32_P32835	TMEM99	NM_145274	Homo sapiens transmembrane protein 99 (TMEM99), mRNA [NM_145274]	0.00510657	3.23072
A_23_P134566	OR2A7	NM_001005328	Homo sapiens olfactory receptor, family 2, subfamily A, member 7 (OR2A7), mRNA [NM_001005328]	0.00178764	3.23056
A_24_P264909	NDFIP2	NM_019080	Homo sapiens Nedd4 family interacting protein 2 (NDFIP2), mRNA [NM_019080]	0.000266565	3.23036
A_23_P153251	ZNF274	NM_133502	Homo sapiens zinc finger protein 274 (ZNF274), transcript variant ZNF274c, mRNA [NM_133502]	0.000349468	3.22725
A_24_P295452	ROD1	NM_005156	Homo sapiens ROD1 regulator of differentiation 1 (S. pombe) (ROD1), mRNA [NM_005156]	0.0013437	3.22619
A_23_P385217	ARL8B	NM_018184	Homo sapiens ADP-ribosylation factor-like 8B (ARL8B), mRNA [NM_018184]	0.00166719	3.22322
A_24_P187706	GOLGA4	NM_002078	Homo sapiens golgi autoantigen, golgin subfamily a, 4 (GOLGA4), mRNA [NM_002078]	2.09378e-05	3.22321
A_23_P4489	NETO1	NM_138966	Homo sapiens neuropilin (NRP) and tolloid (TLL)-like 1 (NETO1), transcript variant 3, mRNA [NM_138966]	0.00265442	3.22225
A_32_P459533	FCHO1	NM_015122	Homo sapiens FCH domain only 1 (FCHO1), mRNA [NM_015122]	0.00161793	3.22208
A_23_P86570	ANXA7	NM_004034	Homo sapiens annexin A7 (ANXA7), transcript variant 2, mRNA [NM_004034]	1.96493e-06	3.21957
A_23_P57137	C20orf29	NM_018347	Homo sapiens chromosome 20 open reading frame 29 (C20orf29), mRNA [NM_018347]	9.37638e-05	3.2175
A_23_P393080	CALML3	NM_005185	Homo sapiens calmodulin-like 3 (CALML3), mRNA [NM_005185]	0.000297338	3.21747
A_24_P209204	C6orf62	NM_030939	Homo sapiens chromosome 6 open reading frame 62 (C6orf62), mRNA [NM_030939]	0.000991623	3.21727
A_23_P152678	EPPB9	NM_015681	Homo sapiens B9 protein (EPPB9), mRNA [NM_015681]	0.00334185	3.21593
A_24_P147263	USP31	AB033029	Homo sapiens mRNA for KIAA1203 protein, partial cds. [AB033029]	1.30146e-05	3.21519
A_23_P135015	KIAA0258	BC001725	Homo sapiens KIAA0258, mRNA (cDNA clone MGC:755 IMAGE:3533857), complete cds. [BC001725]	0.0011823	3.21315
A_23_P136413	MMP17	NM_016155	Homo sapiens matrix metallopeptidase 17 (membrane-inserted) (MMP17), mRNA [NM_016155]	2.17409e-05	3.21235
A_24_P269814	PLEKHA1	NM_001001974	Homo sapiens pleckstrin homology domain containing, family A (phosphoinositide binding specific) member 1 (PLEKHA1), transcript variant 2, mRNA [NM_001001974]	5.32298e-07	3.20796
A_23_P216215	MTFR1	NM_014637	Homo sapiens mitochondrial fission regulator 1 (MTFR1), mRNA [NM_014637]	3.57626e-05	3.2047
A_23_P5995	ARFGEF2	NM_006420	Homo sapiens ADP-ribosylation factor guanine nucleotide-exchange factor 2 (brefeldin A-inhibited) (ARFGEF2), mRNA [NM_006420]	0.000191822	3.19674
A_32_P233860	YWHAZ	NM_145690	Homo sapiens tyrosine 3-monooxygenase/tryptophan 5-monooxygenase activation protein, zeta polypeptide (YWHAZ), transcript variant 2, mRNA [NM_145690]	0.00101632	3.18628
A_23_P29441	SLMAP	NM_007159	Homo sapiens sarcolemma associated protein (SLMAP), mRNA [NM_007159]	3.27177e-05	3.18445
A_24_P142743	CNN2	NM_004368	Homo sapiens calponin 2 (CNN2), transcript variant 1, mRNA [NM_004368]	9.34575e-06	3.18426
A_24_P180849	BSPRY	NM_017688	Homo sapiens B-box and SPRY domain containing (BSPRY), mRNA [NM_017688]	0.00521823	3.18265
A_24_P33048	C14orf28	NM_001017923	Homo sapiens chromosome 14 open reading frame 28 (C14orf28), mRNA [NM_001017923]	1.93269e-05	3.18229
A_32_P179676	TOB2	NM_016272	Homo sapiens transducer of ERBB2, 2 (TOB2), mRNA [NM_016272]	2.20661e-07	3.18165
A_23_P44366	PRKAG2	NM_016203	Homo sapiens protein kinase, AMP-activated, gamma 2 non-catalytic subunit (PRKAG2), transcript variant a, mRNA [NM_016203]	0.000146815	3.18127
A_23_P163458	EHD4	NM_139265	Homo sapiens EH-domain containing 4 (EHD4), mRNA [NM_139265]	1.77114e-06	3.181
A_23_P67980	KLF7	NM_003709	Homo sapiens Kruppel-like factor 7 (ubiquitous) (KLF7), mRNA [NM_003709]	0.000527694	3.17831
A_23_P40156	C20orf121	NM_024331	Homo sapiens chromosome 20 open reading frame 121 (C20orf121), transcript variant 1, mRNA [NM_024331]	1.81549e-05	3.17671
A_24_P329152	CD2AP	NM_012120	Homo sapiens CD2-associated protein (CD2AP), mRNA [NM_012120]	5.62488e-07	3.17137
A_23_P160881	SMPDL3B	NM_001009568	Homo sapiens sphingomyelin phosphodiesterase, acid-like 3B (SMPDL3B), transcript variant 2, mRNA [NM_001009568]	0.00138918	3.1701
A_32_P51237	ANKRD38	NM_181712	Homo sapiens ankyrin repeat domain 38 (ANKRD38), mRNA [NM_181712]	0.000272647	3.16557
A_24_P395814	CGB	NM_000737	Homo sapiens chorionic gonadotropin, beta polypeptide (CGB), mRNA [NM_000737]	4.5574e-07	3.16401
A_23_P50357	ARHGEF18	NM_015318	Homo sapiens rho/rac guanine nucleotide exchange factor (GEF) 18 (ARHGEF18), mRNA [NM_015318]	4.34701e-08	3.15597
A_23_P65129	SPRYD3	NM_032840	Homo sapiens SPRY domain containing 3 (SPRYD3), mRNA [NM_032840]	0.000147657	3.15259
A_24_P91701	LOC51233	NM_016449	Homo sapiens hypothetical protein LOC51233 (LOC51233), mRNA [NM_016449]	0.000475568	3.15182
A_24_P260101	MME	NM_007289	Homo sapiens membrane metallo-endopeptidase (neutral endopeptidase, enkephalinase, CALLA, CD10) (MME), transcript variant 2b, mRNA [NM_007289]	0.000755062	3.14732
A_24_P311926	HLA-G	NM_002127	Homo sapiens HLA-G histocompatibility antigen, class I, G (HLA-G), mRNA [NM_002127]	1.09145e-05	3.14375
A_23_P321388	IBRDC3	NM_153341	Homo sapiens IBR domain containing 3 (IBRDC3), mRNA [NM_153341]	6.17542e-05	3.14092
A_23_P214080	EGR1	NM_001964	Homo sapiens early growth response 1 (EGR1), mRNA [NM_001964]	0.0015674	3.13957
A_23_P163380	MTHFS	NM_006441	Homo sapiens 5,10-methenyltetrahydrofolate synthetase (5-formyltetrahydrofolate cyclo-ligase) (MTHFS), mRNA [NM_006441]	2.47711e-06	3.13184
A_23_P209933	TGOLN2	NM_006464	Homo sapiens trans-golgi network protein 2 (TGOLN2), mRNA [NM_006464]	0.00129424	3.12801
A_24_P391991	LOC340286	AK124132	Homo sapiens cDNA FLJ42138 fis, clone TESTI2036684. [AK124132]	0.000123397	3.12796
A_24_P81900	SLC2A3	NM_006931	Homo sapiens solute carrier family 2 (facilitated glucose transporter), member 3 (SLC2A3), mRNA [NM_006931]	0.00145949	3.12695
A_23_P102060	SSFA2	NM_006751	Homo sapiens sperm specific antigen 2 (SSFA2), mRNA [NM_006751]	0.000211005	3.12555
A_23_P151970	FEM1B	NM_015322	Homo sapiens fem-1 homolog b (C. elegans) (FEM1B), mRNA [NM_015322]	0.000316601	3.12531
A_23_P142830	PLA2R1	NM_007366	Homo sapiens phospholipase A2 receptor 1, 180kDa (PLA2R1), transcript variant 1, mRNA [NM_007366]	2.91733e-06	3.12288
A_24_P294233	GLS	NM_014905	Homo sapiens glutaminase (GLS), mRNA [NM_014905]	0.00190405	3.12189
A_23_P204879	CAB39L	NM_030925	Homo sapiens calcium binding protein 39-like (CAB39L), transcript variant 2, mRNA [NM_030925]	0.000426986	3.12077
A_23_P313728	FAM98A	NM_015475	Homo sapiens family with sequence similarity 98, member A (FAM98A), mRNA [NM_015475]	5.52472e-05	3.11932
A_23_P382654	ASCC3	NM_022091	Homo sapiens activating signal cointegrator 1 complex subunit 3 (ASCC3), transcript variant 2, mRNA [NM_022091]	8.95967e-06	3.1185
A_23_P101655	ACTN4	NM_004924	Homo sapiens actinin, alpha 4 (ACTN4), mRNA [NM_004924]	0.000100572	3.11718
A_23_P363968	C1RL	NM_016546	Homo sapiens complement component 1, r subcomponent-like (C1RL), mRNA [NM_016546]	0.00140945	3.11136
A_24_P288915	FLJ36492	AK093811	Homo sapiens cDNA FLJ36492 fis, clone THYMU2018455. [AK093811]	2.1042e-05	3.10733
A_23_P337242	TGFBR2	NM_003242	Homo sapiens transforming growth factor, beta receptor II (70/80kDa) (TGFBR2), transcript variant 2, mRNA [NM_003242]	0.000250918	3.10469
A_23_P90311	TICAM1	NM_014261	Homo sapiens toll-like receptor adaptor molecule 1 (TICAM1), transcript variant 1, mRNA [NM_014261]	7.76759e-05	3.10432
A_24_P180165	IL1RAP	NM_002182	Homo sapiens interleukin 1 receptor accessory protein (IL1RAP), transcript variant 1, mRNA [NM_002182]	0.000154423	3.09705
A_24_P74932	PLP2	NM_002668	Homo sapiens proteolipid protein 2 (colonic epithelium-enriched) (PLP2), mRNA [NM_002668]	0.00170472	3.09581
A_32_P32391	OR7E156P	NR_002171	Homo sapiens olfactory receptor, family 7, subfamily E, member 156 pseudogene (OR7E156P) on chromosome 13 [NR_002171]	0.00348879	3.09346
A_24_P290481	VIL2	NM_003379	Homo sapiens villin 2 (ezrin) (VIL2), mRNA [NM_003379]	0.000334285	3.09074
A_23_P158470	C3orf54	NM_203370	Homo sapiens chromosome 3 open reading frame 54 (C3orf54), mRNA [NM_203370]	0.000163843	3.08647
A_24_P379765	MOBK1B	NM_018221	Homo sapiens MOB1, Mps One Binder kinase activator-like 1B (yeast) (MOBK1B), mRNA [NM_018221]	0.000842082	3.08214
A_23_P26878	NDEL1	NM_030808	Homo sapiens nudE nuclear distribution gene E homolog like 1 (A. nidulans) (NDEL1), transcript variant 2, mRNA [NM_030808]	0.00119696	3.07936
A_23_P100654	ZBTB4	NM_020899	Homo sapiens zinc finger and BTB domain containing 4 (ZBTB4), mRNA [NM_020899]	5.24957e-05	3.07887
A_32_P703	LOC646626	XM_942822	PREDICTED: Homo sapiens hypothetical protein LOC647393 (LOC647393), mRNA [XM_942822]	0.00105342	3.0777
A_23_P16409	CAPN12	NM_144691	Homo sapiens calpain 12 (CAPN12), mRNA [NM_144691]	0.00674376	3.07697
A_23_P212025	ZBTB38	AK094201	Homo sapiens cDNA FLJ36882 fis, clone BLADE2000340, weakly similar to ZINC FINGER PROTEIN 177. [AK094201]	0.000270013	3.07678
A_24_P307869	LLGL2	NM_004524	Homo sapiens lethal giant larvae homolog 2 (Drosophila) (LLGL2), transcript variant 1, mRNA [NM_004524]	4.64493e-05	3.07627
A_23_P417331	RPS6KA3	NM_004586	Homo sapiens ribosomal protein S6 kinase, 90kDa, polypeptide 3 (RPS6KA3), mRNA [NM_004586]	0.0019646	3.07563
A_23_P373598	MAFK	NM_002360	Homo sapiens v-maf musculoaponeurotic fibrosarcoma oncogene homolog K (avian) (MAFK), mRNA [NM_002360]	0.000420336	3.07186
A_32_P393316	HSU79275	U79275	Human clone 23947 mRNA, partial cds. [U79275]	0.00659347	3.06824
A_23_P86610	ZNF365	NM_014951	Homo sapiens zinc finger protein 365 (ZNF365), transcript variant A, mRNA [NM_014951]	0.00377624	3.06751
A_23_P328206	DNMBP	BC041628	Homo sapiens dynamin binding protein, mRNA (cDNA clone MGC:52388 IMAGE:4329464), complete cds. [BC041628]	1.08787e-06	3.06693
A_23_P122393	EGFL9	NM_206539	Homo sapiens EGF-like-domain, multiple 9 (EGFL9), transcript variant 2, mRNA [NM_206539]	0.00177054	3.06592
A_24_P295010	SERPINB9	NM_004155	Homo sapiens serpin peptidase inhibitor, clade B (ovalbumin), member 9 (SERPINB9), mRNA [NM_004155]	0.00257327	3.06474
A_23_P65789	MCTP2	BC041387	Homo sapiens multiple C2 domains, transmembrane 2, mRNA (cDNA clone MGC:43948 IMAGE:5276211), complete cds. [BC041387]	9.64546e-05	3.06455
A_23_P403898	PTPN3	NM_002829	Homo sapiens protein tyrosine phosphatase, non-receptor type 3 (PTPN3), mRNA [NM_002829]	9.12827e-05	3.06319
A_23_P16252	KLK1	NM_002257	Homo sapiens kallikrein 1, renal/pancreas/salivary (KLK1), mRNA [NM_002257]	0.00404923	3.06111
A_23_P84219	LIPH	NM_139248	Homo sapiens lipase, member H (LIPH), mRNA [NM_139248]	0.00215533	3.06075
A_23_P150876	VPS37B	NM_024667	Homo sapiens vacuolar protein sorting 37 homolog B (S. cerevisiae) (VPS37B), mRNA [NM_024667]	7.23865e-08	3.06062
A_23_P348894	SEC23A	NM_006364	Homo sapiens Sec23 homolog A (S. cerevisiae) (SEC23A), mRNA [NM_006364]	3.59945e-05	3.05914
A_23_P159255	PTPRM	NM_002845	Homo sapiens protein tyrosine phosphatase, receptor type, M (PTPRM), mRNA [NM_002845]	0.000580086	3.05734
A_24_P400507	C3orf64	NM_173654	Homo sapiens chromosome 3 open reading frame 64 (C3orf64), mRNA [NM_173654]	6.2581e-05	3.05704
A_23_P424080	YIPF4	NM_032312	Homo sapiens Yip1 domain family, member 4 (YIPF4), mRNA [NM_032312]	0.00646709	3.05443
A_23_P211806	LRRFIP2	NM_017724	Homo sapiens leucine rich repeat (in FLII) interacting protein 2 (LRRFIP2), transcript variant 2, mRNA [NM_017724]	0.00983936	3.05224
A_23_P258698	MANBA	NM_005908	Homo sapiens mannosidase, beta A, lysosomal (MANBA), mRNA [NM_005908]	3.25178e-05	3.04867
A_24_P283225	MYO6	NM_004999	Homo sapiens myosin VI (MYO6), mRNA [NM_004999]	0.000470609	3.04685
A_23_P339053	C16orf52	BC027604	Homo sapiens chromosome 16 open reading frame 52, mRNA (cDNA clone MGC:26782 IMAGE:4838212), complete cds. [BC027604]	3.29578e-05	3.04649
A_23_P146990	WWP1	NM_007013	Homo sapiens WW domain containing E3 ubiquitin protein ligase 1 (WWP1), mRNA [NM_007013]	6.12323e-08	3.04549
A_23_P420293	C11orf45	NM_145013	Homo sapiens chromosome 11 open reading frame 45 (C11orf45), mRNA [NM_145013]	0.000629169	3.04493
A_23_P81219	PLAC8	NM_016619	Homo sapiens placenta-specific 8 (PLAC8), mRNA [NM_016619]	0.00410918	3.04113
A_23_P252711	LACTB2	NM_016027	Homo sapiens lactamase, beta 2 (LACTB2), mRNA [NM_016027]	4.09957e-05	3.041
A_23_P210608	ZNF217	NM_006526	Homo sapiens zinc finger protein 217 (ZNF217), mRNA [NM_006526]	0.000195568	3.0406
A_23_P218108	WDFY2	NM_052950	Homo sapiens WD repeat and FYVE domain containing 2 (WDFY2), mRNA [NM_052950]	0.000904134	3.03797
A_23_P150147	SSH3	NM_018276	Homo sapiens slingshot homolog 3 (Drosophila) (SSH3), transcript variant 2, mRNA [NM_018276]	7.26925e-05	3.03604
A_24_P313109	UFM1	NM_016617	Homo sapiens ubiquitin-fold modifier 1 (UFM1), mRNA [NM_016617]	0.00316943	3.03536
A_23_P13083	BARX2	NM_003658	Homo sapiens BarH-like homeobox 2 (BARX2), mRNA [NM_003658]	0.000122491	3.03461
A_24_P106363	MARVELD2	NM_144724	Homo sapiens MARVEL domain containing 2 (MARVELD2), transcript variant 2, mRNA [NM_144724]	1.05426e-06	3.03145
A_23_P6381	MN1	NM_002430	Homo sapiens meningioma (disrupted in balanced translocation) 1 (MN1), mRNA [NM_002430]	1.92202e-05	3.02975
A_23_P363316	HOXB5	NM_002147	Homo sapiens homeobox B5 (HOXB5), mRNA [NM_002147]	0.000990593	3.028
A_24_P303989	BMI1	NM_005180	Homo sapiens B lymphoma Mo-MLV insertion region (mouse) (BMI1), mRNA [NM_005180]	0.00060112	3.02777
A_23_P51958	NBL1	NM_182744	Homo sapiens neuroblastoma, suppression of tumorigenicity 1 (NBL1), transcript variant 1, mRNA [NM_182744]	0.0014638	3.02645
A_32_P194312	SDK2	BC066363	Homo sapiens sidekick homolog 2 (chicken), mRNA (cDNA clone IMAGE:6172764), partial cds. [BC066363]	1.74374e-05	3.02578
A_23_P166640	ARL6IP5	NM_006407	Homo sapiens ADP-ribosylation-like factor 6 interacting protein 5 (ARL6IP5), mRNA [NM_006407]	3.09021e-05	3.02514
A_32_P107208	C1orf106	NM_018265	Homo sapiens chromosome 1 open reading frame 106 (C1orf106), mRNA [NM_018265]	0.000672313	3.02506
A_23_P80449	THRB	NM_000461	Homo sapiens thyroid hormone receptor, beta (erythroblastic leukemia viral (v-erb-a) oncogene homolog 2, avian) (THRB), mRNA [NM_000461]	0.000233225	3.02408
A_32_P115606	PXK	AK131385	Homo sapiens cDNA FLJ16460 fis, clone BRCAN2018240. [AK131385]	0.00130725	3.02393
A_23_P256890	PTRH1	CR611847	full-length cDNA clone CS0DI077YC19 of Placenta Cot 25-normalized of Homo sapiens (human). [CR611847]	2.92986e-05	3.02332
A_23_P328600	SLC24A6	NM_024959	Homo sapiens solute carrier family 24 (sodium/potassium/calcium exchanger), member 6 (SLC24A6), mRNA [NM_024959]	4.88524e-05	3.02132
A_24_P294851	TRIM38	NM_006355	Homo sapiens tripartite motif-containing 38 (TRIM38), mRNA [NM_006355]	0.000322042	3.02128
A_24_P323941	C20orf106	NM_001012971	Homo sapiens chromosome 20 open reading frame 106 (C20orf106), mRNA [NM_001012971]	0.0022835	3.0178
A_24_P315306	LOC162073	AK096327	Homo sapiens cDNA FLJ39008 fis, clone NT2RI2025255. [AK096327]	2.70987e-07	3.01556
A_23_P201758	CD46	NM_002389	Homo sapiens CD46 molecule, complement regulatory protein (CD46), transcript variant a, mRNA [NM_002389]	0.00404814	3.01498
A_24_P247987	C16orf57	NM_024598	Homo sapiens chromosome 16 open reading frame 57 (C16orf57), mRNA [NM_024598]	0.00258127	3.01366
A_23_P38388	TMEM92	NM_153229	Homo sapiens transmembrane protein 92 (TMEM92), mRNA [NM_153229]	0.00246626	3.01325
A_24_P236956	RAB3D	BC007960	Homo sapiens RAB3D, member RAS oncogene family, mRNA (cDNA clone IMAGE:4301650), partial cds. [BC007960]	9.49815e-06	3.01298
A_24_P159948	ARFRP1	NM_003224	Homo sapiens ADP-ribosylation factor related protein 1 (ARFRP1), mRNA [NM_003224]	0.000724637	3.01196
A_23_P123454	NUDT18	NM_024815	Homo sapiens nudix (nucleoside diphosphate linked moiety X)-type motif 18 (NUDT18), mRNA [NM_024815]	3.14622e-06	3.00994
A_23_P78122	MYO18A	NM_078471	Homo sapiens myosin XVIIIA (MYO18A), transcript variant 1, mRNA [NM_078471]	5.7547e-05	3.00976
A_23_P160618	SH2D2A	NM_003975	Homo sapiens SH2 domain protein 2A (SH2D2A), mRNA [NM_003975]	0.00157015	3.00811
					47582.2

## Sheet: Up in PC3
Probe Name	Gene Symbol	Accession Number	Description	p-value	Fold Change
A_23_P148255	MAGEA2B	NM_153488	Homo sapiens melanoma antigen family A, 2B (MAGEA2B), mRNA [NM_153488]	1.75579e-13	1141.51
A_23_P164057	MFAP4	NM_002404	Homo sapiens microfibrillar-associated protein 4 (MFAP4), mRNA [NM_002404]	2.60456e-15	1053.55
A_23_P303087	PTN	NM_002825	Homo sapiens pleiotrophin (heparin binding growth factor 8, neurite growth-promoting factor 1) (PTN), mRNA [NM_002825]	3.48162e-14	958.959
A_23_P256470	NPY	NM_000905	Homo sapiens neuropeptide Y (NPY), mRNA [NM_000905]	8.84531e-16	957.358
A_23_P46045	RGS5	NM_003617	Homo sapiens regulator of G-protein signalling 5 (RGS5), mRNA [NM_003617]	6.01468e-12	862.091
A_23_P389987	TLX2	NM_016170	Homo sapiens T-cell leukemia homeobox 2 (TLX2), mRNA [NM_016170]	1.57722e-10	781.706
A_23_P373521	HAND2	NM_021973	Homo sapiens heart and neural crest derivatives expressed 2 (HAND2), mRNA [NM_021973]	6.52378e-13	715.29
A_23_P208030	SYT4	NM_020783	Homo sapiens synaptotagmin IV (SYT4), mRNA [NM_020783]	3.07451e-12	636.195
A_23_P120125	COLEC11	NM_199235	Homo sapiens collectin sub-family member 11 (COLEC11), transcript variant 2, mRNA [NM_199235]	5.31221e-16	590.356
A_23_P252928	MAGEA12	NM_005367	Homo sapiens melanoma antigen family A, 12 (MAGEA12), mRNA [NM_005367]	6.33537e-16	491.453
A_24_P271696	XAGE1	NM_133431	Homo sapiens X antigen family, member 1 (XAGE1), transcript variant 2, mRNA [NM_133431]	7.29344e-15	471.516
A_23_P133000	NBLA00301	AB075501	Homo sapiens neuroblastoma cDNA, clone:Nbla00301, full insert sequence. [AB075501]	5.00386e-13	399.152
A_23_P119943	IGFBP2	NM_000597	Homo sapiens insulin-like growth factor binding protein 2, 36kDa (IGFBP2), mRNA [NM_000597]	1.4587e-09	394.952
A_23_P71067	TWIST1	NM_000474	Homo sapiens twist homolog 1 (acrocephalosyndactyly 3; Saethre-Chotzen syndrome) (Drosophila) (TWIST1), mRNA [NM_000474]	3.47468e-12	366.65
A_23_P32444	MXRA8	NM_032348	Homo sapiens matrix-remodelling associated 8 (MXRA8), mRNA [NM_032348]	7.69605e-12	361.372
A_23_P112296	DBH	NM_000787	Homo sapiens dopamine beta-hydroxylase (dopamine beta-monooxygenase) (DBH), mRNA [NM_000787]	2.48114e-13	344.999
A_23_P142255	SHD	NM_020209	Homo sapiens Src homology 2 domain containing transforming protein D (SHD), mRNA [NM_020209]	3.04976e-14	338.206
A_24_P20954	TFAP2B	NM_003221	Homo sapiens transcription factor AP-2 beta (activating enhancer binding protein 2 beta) (TFAP2B), mRNA [NM_003221]	1.19358e-13	331.447
A_24_P302584	SOX11	NM_003108	Homo sapiens SRY (sex determining region Y)-box 11 (SOX11), mRNA [NM_003108]	2.11309e-13	331.128
A_23_P137173	TMSL8	NM_021992	Homo sapiens thymosin-like 8 (TMSL8), mRNA [NM_021992]	7.63619e-10	327.443
A_23_P254688	TMEM108	NM_023943	Homo sapiens transmembrane protein 108 (TMEM108), mRNA [NM_023943]	4.30005e-13	299.324
A_24_P500584	XIST	NR_001564	Homo sapiens X (inactive)-specific transcript (XIST) on chromosome X [NR_001564]	3.08239e-14	285.005
A_23_P72968	RP13-102H20.1	NM_144967	Homo sapiens hypothetical protein FLJ30058 (FLJ30058), mRNA [NM_144967]	1.30725e-13	259.334
A_23_P253911	CHRNA3	NM_000743	Homo sapiens cholinergic receptor, nicotinic, alpha 3 (CHRNA3), mRNA [NM_000743]	0.000175487	238.827
A_23_P251499	PCOLCE	NM_002593	Homo sapiens procollagen C-endopeptidase enhancer (PCOLCE), mRNA [NM_002593]	3.11821e-09	230.761
A_24_P314477	TUBB2B	NM_178012	Homo sapiens tubulin, beta 2B (TUBB2B), mRNA [NM_178012]	9.14119e-15	225.112
A_23_P351204	KCNQ2	NM_172109	Homo sapiens potassium voltage-gated channel, KQT-like subfamily, member 2 (KCNQ2), transcript variant 5, mRNA [NM_172109]	3.23558e-10	221.707
A_32_P196263	ADAMTS9	NM_182920	Homo sapiens ADAM metallopeptidase with thrombospondin type 1 motif, 9 (ADAMTS9), mRNA [NM_182920]	2.43736e-14	221.536
A_23_P213228	PHOX2B	NM_003924	Homo sapiens paired-like homeobox 2b (PHOX2B), mRNA [NM_003924]	1.29372e-14	215.241
A_24_P216361	PRAME	NM_206956	Homo sapiens preferentially expressed antigen in melanoma (PRAME), transcript variant 5, mRNA [NM_206956]	1.15994e-15	207.52
A_23_P38732	CDH2	NM_001792	Homo sapiens cadherin 2, type 1, N-cadherin (neuronal) (CDH2), mRNA [NM_001792]	6.23091e-11	207.11
A_23_P16283	CPT1C	NM_152359	Homo sapiens carnitine palmitoyltransferase 1C (CPT1C), mRNA [NM_152359]	1.79782e-09	202.869
A_23_P136870	MAGEA6	NM_175868	Homo sapiens melanoma antigen family A, 6 (MAGEA6), transcript variant 2, mRNA [NM_175868]	4.87502e-16	182.894
A_32_P190303	LONRF2	NM_198461	Homo sapiens LON peptidase N-terminal domain and ring finger 2 (LONRF2), mRNA [NM_198461]	2.99244e-12	181.462
A_23_P146274	STMN2	NM_007029	Homo sapiens stathmin-like 2 (STMN2), mRNA [NM_007029]	6.94948e-06	180.981
A_23_P358345	SLC6A2	NM_001043	Homo sapiens solute carrier family 6 (neurotransmitter transporter, noradrenalin), member 2 (SLC6A2), mRNA [NM_001043]	9.49115e-14	180.884
A_23_P145644	DDC	NM_000790	Homo sapiens dopa decarboxylase (aromatic L-amino acid decarboxylase) (DDC), mRNA [NM_000790]	0.000742623	175.724
A_23_P331049	DPYSL4	NM_006426	Homo sapiens dihydropyrimidinase-like 4 (DPYSL4), mRNA [NM_006426]	2.90341e-13	163.248
A_23_P159952	BEX1	NM_018476	Homo sapiens brain expressed, X-linked 1 (BEX1), mRNA [NM_018476]	0.000261391	157.515
A_23_P204286	MGP	NM_000900	Homo sapiens matrix Gla protein (MGP), mRNA [NM_000900]	1.44056e-09	156.247
A_23_P151710	PTGER2	NM_000956	Homo sapiens prostaglandin E receptor 2 (subtype EP2), 53kDa (PTGER2), mRNA [NM_000956]	6.06584e-13	154.367
A_23_P217228	TRO	NM_016157	Homo sapiens trophinin (TRO), transcript variant 3, mRNA [NM_016157]	9.18629e-16	153.853
A_23_P64873	DCN	NM_001920	Homo sapiens decorin (DCN), transcript variant A1, mRNA [NM_001920]	4.1506e-11	150.749
A_23_P417951	TSPYL5	NM_033512	Homo sapiens TSPY-like 5 (TSPYL5), mRNA [NM_033512]	1.23484e-10	150.17
A_23_P300600	NEFH	NM_021076	Homo sapiens neurofilament, heavy polypeptide 200kDa (NEFH), mRNA [NM_021076]	0.000120912	144.282
A_23_P79482	CHN1	NM_001822	Homo sapiens chimerin (chimaerin) 1 (CHN1), transcript variant 1, mRNA [NM_001822]	2.16097e-12	143.853
A_24_P79529	CSAG3A	NM_203311	Homo sapiens CSAG family, member 3A (CSAG3A), mRNA [NM_203311]	1.47996e-11	143.715
A_32_P27917	KIF26A	BC009415	Homo sapiens kinesin family member 26A, mRNA (cDNA clone IMAGE:3502885), complete cds. [BC009415]	5.45682e-10	142.729
A_23_P335329	GNG4	NM_004485	Homo sapiens guanine nucleotide binding protein (G protein), gamma 4 (GNG4), mRNA [NM_004485]	2.44541e-11	139.514
A_23_P165848	EMILIN1	NM_007046	Homo sapiens elastin microfibril interfacer 1 (EMILIN1), mRNA [NM_007046]	3.37336e-13	134.164
A_23_P152305	CDH11	NM_001797	Homo sapiens cadherin 11, type 2, OB-cadherin (osteoblast) (CDH11), mRNA [NM_001797]	7.28327e-12	130.47
A_24_P236251	DLK1	NM_003836	Homo sapiens delta-like 1 homolog (Drosophila) (DLK1), transcript variant 1, mRNA [NM_003836]	1.17552e-05	127.022
A_23_P110022	GATA2	NM_032638	Homo sapiens GATA binding protein 2 (GATA2), mRNA [NM_032638]	1.60668e-11	124.099
A_23_P112289	TMOD1	NM_003275	Homo sapiens tropomodulin 1 (TMOD1), mRNA [NM_003275]	8.57675e-13	123.742
A_24_P79070	GNG8	NM_033258	Homo sapiens guanine nucleotide binding protein (G protein), gamma 8 (GNG8), mRNA [NM_033258]	3.1308e-13	123.458
A_23_P164451	TBX2	NM_005994	Homo sapiens T-box 2 (TBX2), mRNA [NM_005994]	3.80219e-13	121.094
A_23_P103672	NES	NM_006617	Homo sapiens nestin (NES), mRNA [NM_006617]	1.34679e-10	119.108
A_23_P87310	LMO1	NM_002315	Homo sapiens LIM domain only 1 (rhombotin 1) (LMO1), mRNA [NM_002315]	4.80042e-14	113.005
A_24_P166613	EPDR1	NM_017549	Homo sapiens ependymin related protein 1 (zebrafish) (EPDR1), mRNA [NM_017549]	1.59067e-10	112.956
A_32_P32254	CMAH	NR_002174	Homo sapiens cytidine monophosphate-N-acetylneuraminic acid hydroxylase (CMP-N-acetylneuraminate monooxygenase) (CMAH) on chromosome 6 [NR_002174]	0.001188	112.889
A_23_P53884	MAB21L1	NM_005584	Homo sapiens mab-21-like 1 (C. elegans) (MAB21L1), mRNA [NM_005584]	2.0862e-13	112.367
A_24_P916496	PRKCA	NM_002737	Homo sapiens protein kinase C, alpha (PRKCA), mRNA [NM_002737]	1.0837e-11	111.489
A_23_P346900	CACNA2D2	NM_001005505	Homo sapiens calcium channel, voltage-dependent, alpha 2/delta subunit 2 (CACNA2D2), transcript variant 1, mRNA [NM_001005505]	2.9429e-14	110.986
A_24_P296808	FLJ10781	NM_018215	Homo sapiens hypothetical protein FLJ10781 (FLJ10781), mRNA [NM_018215]	2.99031e-11	109.071
A_23_P111860	FILIP1	AL832009	Homo sapiens mRNA; cDNA DKFZp451B134 (from clone DKFZp451B134); complete cds. [AL832009]	1.26079e-14	108.763
A_23_P82523	ABCB1	NM_000927	Homo sapiens ATP-binding cassette, sub-family B (MDR/TAP), member 1 (ABCB1), mRNA [NM_000927]	1.90922e-15	107.486
A_23_P99063	LUM	NM_002345	Homo sapiens lumican (LUM), mRNA [NM_002345]	1.00389e-12	106.909
A_23_P168403	KCNH2	NM_000238	Homo sapiens potassium voltage-gated channel, subfamily H (eag-related), member 2 (KCNH2), transcript variant 1, mRNA [NM_000238]	6.26857e-05	100.376
A_23_P357936	ASTN2	NM_014010	Homo sapiens astrotactin 2 (ASTN2), transcript variant 1, mRNA [NM_014010]	3.48393e-09	98.0778
A_23_P352932	SORCS1	NM_052918	Homo sapiens sortilin-related VPS10 domain containing receptor 1 (SORCS1), transcript variant 1, mRNA [NM_052918]	1.44654e-10	96.4974
A_23_P72127	KIAA1446	NM_020836	Homo sapiens likely ortholog of rat brain-enriched guanylate kinase-associated protein (KIAA1446), mRNA [NM_020836]	3.38844e-09	94.63
A_24_P402510	SAMD11	NM_152486	Homo sapiens sterile alpha motif domain containing 11 (SAMD11), mRNA [NM_152486]	1.28766e-11	92.5047
A_23_P157299	AEBP1	NM_001129	Homo sapiens AE binding protein 1 (AEBP1), mRNA [NM_001129]	8.6615e-11	90.3129
A_23_P256158	ADRA2C	NM_000683	Homo sapiens adrenergic, alpha-2C-, receptor (ADRA2C), mRNA [NM_000683]	0.000137806	89.8324
A_23_P125788	TCEAL7	NM_152278	Homo sapiens transcription elongation factor A (SII)-like 7 (TCEAL7), mRNA [NM_152278]	4.78065e-11	89.8228
A_23_P51376	FAM77C	NM_024522	Homo sapiens family with sequence similarity 77, member C (FAM77C), mRNA [NM_024522]	5.70617e-14	87.916
A_23_P421401	PDGFRB	NM_002609	Homo sapiens platelet-derived growth factor receptor, beta polypeptide (PDGFRB), mRNA [NM_002609]	1.2426e-10	87.1457
A_23_P107116	ZNF179	NM_007148	Homo sapiens zinc finger protein 179 (ZNF179), mRNA [NM_007148]	1.01288e-11	85.7273
A_23_P360754	ADAM22	BC036029	Homo sapiens ADAM metallopeptidase domain 22, mRNA (cDNA clone IMAGE:5278621), complete cds. [BC036029]	0.00109282	85.2579
A_24_P88696	SCG2	NM_003469	Homo sapiens secretogranin II (chromogranin C) (SCG2), mRNA [NM_003469]	4.95845e-12	84.275
A_23_P146134	DUSP26	NM_024025	Homo sapiens dual specificity phosphatase 26 (putative) (DUSP26), mRNA [NM_024025]	2.93302e-10	80.3051
A_23_P48530	INSM2	NM_032594	Homo sapiens insulinoma-associated 2 (INSM2), mRNA [NM_032594]	1.44652e-11	79.8221
A_24_P184803	COCH	NM_004086	Homo sapiens coagulation factor C homolog, cochlin (Limulus polyphemus) (COCH), mRNA [NM_004086]	2.98659e-12	79.1022
A_23_P374844	GAL	NM_015973	Homo sapiens galanin (GAL), mRNA [NM_015973]	2.93721e-06	78.6952
A_23_P25674	CHRM2	NM_001006627	Homo sapiens cholinergic receptor, muscarinic 2 (CHRM2), transcript variant 2, mRNA [NM_001006627]	2.17545e-05	77.5315
A_23_P52207	BAMBI	NM_012342	Homo sapiens BMP and activin membrane-bound inhibitor homolog (Xenopus laevis) (BAMBI), mRNA [NM_012342]	5.91767e-09	75.7216
A_23_P65678	FBN1	NM_000138	Homo sapiens fibrillin 1 (FBN1), mRNA [NM_000138]	7.2709e-13	74.0083
A_24_P567298	CSAG2	NM_004909	Homo sapiens CSAG family, member 2 (CSAG2), mRNA [NM_004909]	5.62648e-11	73.1857
A_23_P155848	DKK2	NM_014421	Homo sapiens dickkopf homolog 2 (Xenopus laevis) (DKK2), mRNA [NM_014421]	1.36392e-11	71.9816
A_23_P329353	C2orf32	NM_015463	Homo sapiens chromosome 2 open reading frame 32 (C2orf32), mRNA [NM_015463]	5.53803e-12	71.5192
A_23_P35617	PLCE1	NM_016341	Homo sapiens phospholipase C, epsilon 1 (PLCE1), mRNA [NM_016341]	4.13915e-11	70.8226
A_23_P326760	MYRIP	NM_015460	Homo sapiens myosin VIIA and Rab interacting protein (MYRIP), mRNA [NM_015460]	1.69795e-11	70.0171
A_23_P117882	CP110	NM_014711	Homo sapiens CP110 protein (CP110), mRNA [NM_014711]	1.82417e-12	69.2889
A_23_P319005	HMP19	NM_015980	Homo sapiens HMP19 protein (HMP19), mRNA [NM_015980]	2.80904e-12	69.108
A_23_P320242	KIAA1324L	NM_152748	Homo sapiens KIAA1324-like (KIAA1324L), mRNA [NM_152748]	9.22666e-13	62.2566
A_24_P185945	MAGEA4	NM_002362	Homo sapiens melanoma antigen family A, 4 (MAGEA4), transcript variant 2, mRNA [NM_002362]	5.74066e-14	62.1323
A_23_P140290	RTN1	NM_021136	Homo sapiens reticulon 1 (RTN1), transcript variant 1, mRNA [NM_021136]	1.43858e-12	61.4323
A_24_P382533	NNAT	NM_005386	Homo sapiens neuronatin (NNAT), transcript variant 1, mRNA [NM_005386]	4.7689e-14	60.7694
A_32_P154473	KIF5C	AB011103	Homo sapiens mRNA for KIAA0531 protein, partial cds. [AB011103]	6.49027e-14	60.1572
A_23_P314811	SLC10A4	NM_152679	Homo sapiens solute carrier family 10 (sodium/bile acid cotransporter family), member 4 (SLC10A4), mRNA [NM_152679]	1.76275e-11	59.0103
A_24_P248240	SYT11	NM_152280	Homo sapiens synaptotagmin XI (SYT11), mRNA [NM_152280]	2.82907e-11	58.9871
A_23_P66017	PRRT2	NM_145239	Homo sapiens proline-rich transmembrane protein 2 (PRRT2), mRNA [NM_145239]	9.82973e-09	58.1046
A_23_P253446	GAP43	NM_002045	Homo sapiens growth associated protein 43 (GAP43), mRNA [NM_002045]	2.84129e-05	57.7222
A_24_P129326	VGF	NM_003378	Homo sapiens VGF nerve growth factor inducible (VGF), mRNA [NM_003378]	4.85546e-13	57.05
A_23_P132956	UCHL1	NM_004181	Homo sapiens ubiquitin carboxyl-terminal esterase L1 (ubiquitin thiolesterase) (UCHL1), mRNA [NM_004181]	0.000518923	56.7466
A_24_P389415	PNMA2	NM_007257	Homo sapiens paraneoplastic antigen MA2 (PNMA2), mRNA [NM_007257]	6.90294e-10	56.737
A_23_P138706	ADRA2A	NM_000681	Homo sapiens adrenergic, alpha-2A-, receptor (ADRA2A), mRNA [NM_000681]	1.34717e-08	56.6188
A_23_P144274	JAKMIP1	NM_144720	Homo sapiens janus kinase and microtubule interacting protein 1 (JAKMIP1), mRNA [NM_144720]	3.89579e-13	55.0795
A_24_P11061	CSAG1	NM_153479	Homo sapiens chondrosarcoma associated gene 1 (CSAG1), transcript variant b, mRNA [NM_153479]	1.66165e-06	53.8136
A_23_P213857	C7	NM_000587	Homo sapiens complement component 7 (C7), mRNA [NM_000587]	4.89248e-05	52.9889
A_23_P132889	CRMP1	NM_001014809	Homo sapiens collapsin response mediator protein 1 (CRMP1), transcript variant 1, mRNA [NM_001014809]	5.13656e-11	52.0217
A_23_P36531	TSPAN8	NM_004616	Homo sapiens tetraspanin 8 (TSPAN8), mRNA [NM_004616]	6.44599e-12	51.2129
A_32_P69368	ID2	NM_002166	Homo sapiens inhibitor of DNA binding 2, dominant negative helix-loop-helix protein (ID2), mRNA [NM_002166]	0.000370819	51.0715
A_23_P171074	ITM2A	NM_004867	Homo sapiens integral membrane protein 2A (ITM2A), mRNA [NM_004867]	1.17643e-11	50.8006
A_24_P350589	RNF150	NM_020724	Homo sapiens ring finger protein 150 (RNF150), mRNA [NM_020724]	2.2702e-10	50.1831
A_24_P772488	PLXNA4A	AB046770	Homo sapiens mRNA for KIAA1550 protein, partial cds. [AB046770]	2.99316e-11	50.0073
A_23_P74278	PDE4B	NM_001037341	Homo sapiens phosphodiesterase 4B, cAMP-specific (phosphodiesterase E4 dunce homolog, Drosophila) (PDE4B), transcript variant d, mRNA [NM_001037341]	1.90355e-11	49.0468
A_23_P160377	DNALI1	NM_003462	Homo sapiens dynein, axonemal, light intermediate polypeptide 1 (DNALI1), mRNA [NM_003462]	1.01451e-07	48.6469
A_23_P144827	FBXL7	NM_012304	Homo sapiens F-box and leucine-rich repeat protein 7 (FBXL7), mRNA [NM_012304]	5.02239e-09	48.406
A_23_P300033	PDGFRA	NM_006206	Homo sapiens platelet-derived growth factor receptor, alpha polypeptide (PDGFRA), mRNA [NM_006206]	1.31511e-11	48.3199
A_23_P89431	CCL2	NM_002982	Homo sapiens chemokine (C-C motif) ligand 2 (CCL2), mRNA [NM_002982]	1.71201e-13	47.5872
A_23_P382584	CHGB	NM_001819	Homo sapiens chromogranin B (secretogranin 1) (CHGB), mRNA [NM_001819]	7.93862e-08	47.5143
A_23_P100711	PMP22	NM_000304	Homo sapiens peripheral myelin protein 22 (PMP22), transcript variant 1, mRNA [NM_000304]	0.0010205	46.261
A_23_P392501	TNRC6C	AK056421	Homo sapiens cDNA FLJ31859 fis, clone NT2RP7001231. [AK056421]	7.28021e-12	45.965
A_23_P128375	C12orf34	NM_032829	Homo sapiens chromosome 12 open reading frame 34 (C12orf34), mRNA [NM_032829]	0.000768663	45.8365
A_23_P65278	NBEA	NM_015678	Homo sapiens neurobeachin (NBEA), mRNA [NM_015678]	5.972e-07	44.7212
A_23_P94319	KBTBD11	NM_014867	Homo sapiens kelch repeat and BTB (POZ) domain containing 11 (KBTBD11), mRNA [NM_014867]	3.0946e-07	44.0632
A_23_P416581	GNAZ	NM_002073	Homo sapiens guanine nucleotide binding protein (G protein), alpha z polypeptide (GNAZ), mRNA [NM_002073]	0.0018057	43.9199
A_32_P38645	RIMS4	NM_182970	Homo sapiens regulating synaptic membrane exocytosis 4 (RIMS4), mRNA [NM_182970]	7.86206e-12	43.1668
A_23_P150394	FXYD6	NM_022003	Homo sapiens FXYD domain containing ion transport regulator 6 (FXYD6), mRNA [NM_022003]	2.17172e-12	43.1336
A_23_P90273	CHST8	NM_022467	Homo sapiens carbohydrate (N-acetylgalactosamine 4-0) sulfotransferase 8 (CHST8), mRNA [NM_022467]	0.000354977	41.1554
A_23_P137007	MAGEA10	NM_001011543	Homo sapiens melanoma antigen family A, 10 (MAGEA10), transcript variant 1, mRNA [NM_001011543]	1.50807e-11	41.05
A_23_P157736	PPAPDC3	NM_032728	Homo sapiens phosphatidic acid phosphatase type 2 domain containing 3 (PPAPDC3), mRNA [NM_032728]	8.81335e-14	40.8476
A_23_P52697	CD248	NM_020404	Homo sapiens CD248 molecule, endosialin (CD248), mRNA [NM_020404]	7.12743e-09	40.7725
A_24_P113572	PHF21B	NM_138415	Homo sapiens PHD finger protein 21B (PHF21B), mRNA [NM_138415]	1.40265e-09	40.5672
A_32_P119033	PLCXD3	NM_001005473	Homo sapiens phosphatidylinositol-specific phospholipase C, X domain containing 3 (PLCXD3), mRNA [NM_001005473]	8.22156e-10	40.3275
A_23_P215625	ACTR3B	NM_020445	Homo sapiens ARP3 actin-related protein 3 homolog B (yeast) (ACTR3B), transcript variant 1, mRNA [NM_020445]	7.35155e-13	39.9144
A_23_P26824	LIMD2	NM_030576	Homo sapiens LIM domain containing 2 (LIMD2), mRNA [NM_030576]	1.29732e-07	38.7037
A_23_P101905	AP1S2	NM_003916	Homo sapiens adaptor-related protein complex 1, sigma 2 subunit (AP1S2), mRNA [NM_003916]	4.27015e-08	38.5191
A_23_P85460	CDKN2C	NM_001262	Homo sapiens cyclin-dependent kinase inhibitor 2C (p18, inhibits CDK4) (CDKN2C), transcript variant 1, mRNA [NM_001262]	0.000504491	37.9616
A_24_P577694	ADCY1	NM_021116	Homo sapiens adenylate cyclase 1 (brain) (ADCY1), mRNA [NM_021116]	6.99302e-11	37.9048
A_23_P399001	CXXC5	NM_016463	Homo sapiens CXXC finger 5 (CXXC5), mRNA [NM_016463]	5.59699e-07	37.492
A_23_P81529	ISL1	NM_002202	Homo sapiens ISL1 transcription factor, LIM/homeodomain, (islet-1) (ISL1), mRNA [NM_002202]	2.54069e-10	37.32
A_23_P74900	ESRRG	NM_206594	Homo sapiens estrogen-related receptor gamma (ESRRG), transcript variant 2, mRNA [NM_206594]	4.16538e-12	36.7635
A_24_P402242	COL3A1	NM_000090	Homo sapiens collagen, type III, alpha 1 (Ehlers-Danlos syndrome type IV, autosomal dominant) (COL3A1), mRNA [NM_000090]	3.38465e-09	36.7238
A_23_P215913	CLU	NM_203339	Homo sapiens clusterin (CLU), transcript variant 2, mRNA [NM_203339]	4.17802e-11	36.7049
A_23_P218225	QPRT	NM_014298	Homo sapiens quinolinate phosphoribosyltransferase (nicotinate-nucleotide pyrophosphorylase (carboxylating)) (QPRT), mRNA [NM_014298]	8.61025e-06	36.6669
A_23_P110403	PDLIM3	NM_014476	Homo sapiens PDZ and LIM domain 3 (PDLIM3), mRNA [NM_014476]	3.43623e-10	36.1553
A_23_P500433	CARD8	NM_014959	Homo sapiens caspase recruitment domain family, member 8 (CARD8), mRNA [NM_014959]	5.32968e-11	36.0567
A_23_P379864	ASRGL1	BC006267	Homo sapiens asparaginase like 1, mRNA (cDNA clone IMAGE:3952485), complete cds. [BC006267]	4.46704e-11	35.8438
A_32_P6408	DKFZp547K054	AL390175	Homo sapiens mRNA; cDNA DKFZp547K054 (from clone DKFZp547K054). [AL390175]	1.03175e-07	35.4278
A_24_P18137	NEFL	NM_006158	Homo sapiens neurofilament, light polypeptide 68kDa (NEFL), mRNA [NM_006158]	2.11729e-08	35.4039
A_24_P20630	LEF1	NM_016269	Homo sapiens lymphoid enhancer-binding factor 1 (LEF1), mRNA [NM_016269]	2.21999e-10	34.9643
A_23_P54267	SCG3	NM_013243	Homo sapiens secretogranin III (SCG3), mRNA [NM_013243]	1.22768e-10	34.9055
A_23_P216307	RUNX1T1	NM_004349	Homo sapiens runt-related transcription factor 1; translocated to, 1 (cyclin D-related) (RUNX1T1), transcript variant 1, mRNA [NM_004349]	1.47865e-10	34.8827
A_23_P77731	CRYM	NM_001888	Homo sapiens crystallin, mu (CRYM), transcript variant 1, mRNA [NM_001888]	5.81742e-05	34.1062
A_23_P3312	ISLR	NM_005545	Homo sapiens immunoglobulin superfamily containing leucine-rich repeat (ISLR), transcript variant 1, mRNA [NM_005545]	2.30442e-09	33.7845
A_32_P170454	LOC283454	AK094730	Homo sapiens cDNA FLJ37411 fis, clone BRAMY2028682. [AK094730]	3.13916e-09	33.7198
A_24_P309095	RELN	NM_005045	Homo sapiens reelin (RELN), transcript variant 1, mRNA [NM_005045]	5.18977e-10	33.1888
A_23_P119916	WNT6	NM_006522	Homo sapiens wingless-type MMTV integration site family, member 6 (WNT6), mRNA [NM_006522]	3.07669e-12	33.1249
A_23_P33168	SLC18A1	NM_003053	Homo sapiens solute carrier family 18 (vesicular monoamine), member 1 (SLC18A1), mRNA [NM_003053]	5.25148e-13	32.7709
A_23_P250982	ISOC1	NM_016048	Homo sapiens isochorismatase domain containing 1 (ISOC1), mRNA [NM_016048]	2.98782e-08	32.6315
A_23_P337849	TNRC4	NM_007185	Homo sapiens trinucleotide repeat containing 4 (TNRC4), mRNA [NM_007185]	3.80741e-09	32.1771
A_23_P131846	SNAI1	NM_005985	Homo sapiens snail homolog 1 (Drosophila) (SNAI1), mRNA [NM_005985]	7.25996e-10	31.9803
A_23_P43276	GPR124	NM_032777	Homo sapiens G protein-coupled receptor 124 (GPR124), mRNA [NM_032777]	0.000955226	31.952
A_23_P502363	EYA1	NM_000503	Homo sapiens eyes absent homolog 1 (Drosophila) (EYA1), transcript variant 3, mRNA [NM_000503]	4.2285e-14	31.7382
A_23_P101671	ASPM	NM_018136	Homo sapiens asp (abnormal spindle)-like, microcephaly associated (Drosophila) (ASPM), mRNA [NM_018136]	4.85814e-12	30.9703
A_24_P904484	LOC283174	AK123849	Homo sapiens cDNA FLJ41855 fis, clone NT2RI3005724. [AK123849]	6.32306e-05	30.7059
A_23_P88099	MAPT	NM_016835	Homo sapiens microtubule-associated protein tau (MAPT), transcript variant 1, mRNA [NM_016835]	3.65721e-05	30.5364
A_23_P40574	CRYBB2	NM_000496	Homo sapiens crystallin, beta B2 (CRYBB2), mRNA [NM_000496]	5.48744e-08	30.1712
A_32_P379467	ISLR2	NM_020851	Homo sapiens immunoglobulin superfamily containing leucine-rich repeat 2 (ISLR2), mRNA [NM_020851]	5.88141e-11	29.6124
A_23_P123448	C8orf57	AL136588	Homo sapiens mRNA; cDNA DKFZp761D112 (from clone DKFZp761D112). [AL136588]	1.76289e-11	29.3498
A_23_P113351	SPARCL1	NM_004684	Homo sapiens SPARC-like 1 (mast9, hevin) (SPARCL1), mRNA [NM_004684]	6.2003e-12	29.1775
A_23_P208991	PALM	NM_002579	Homo sapiens paralemmin (PALM), transcript variant 1, mRNA [NM_002579]	0.000111221	29.1645
A_23_P83277	IL11RA	NM_004512	Homo sapiens interleukin 11 receptor, alpha (IL11RA), transcript variant 1, mRNA [NM_004512]	1.25124e-06	29.1534
A_23_P431305	FAM69B	NM_152421	Homo sapiens family with sequence similarity 69, member B (FAM69B), mRNA [NM_152421]	4.50958e-06	29.1396
A_23_P69738	RASL11B	NM_023940	Homo sapiens RAS-like, family 11, member B (RASL11B), mRNA [NM_023940]	2.33149e-11	28.7491
A_23_P31376	LRRN3	NM_018334	Homo sapiens leucine rich repeat neuronal 3 (LRRN3), mRNA [NM_018334]	0.0041986	28.2266
A_23_P259851	ADAMTS19	NM_133638	Homo sapiens ADAM metallopeptidase with thrombospondin type 1 motif, 19 (ADAMTS19), mRNA [NM_133638]	8.74422e-06	28.2228
A_23_P399255	RNF182	NM_152737	Homo sapiens ring finger protein 182 (RNF182), mRNA [NM_152737]	2.62261e-08	27.7219
A_23_P27315	EMILIN2	NM_032048	Homo sapiens elastin microfibril interfacer 2 (EMILIN2), mRNA [NM_032048]	2.7489e-09	27.5981
A_23_P215060	PODXL	NM_005397	Homo sapiens podocalyxin-like (PODXL), transcript variant 2, mRNA [NM_005397]	1.18018e-06	26.8139
A_23_P102000	CXCR4	NM_001008540	Homo sapiens chemokine (C-X-C motif) receptor 4 (CXCR4), transcript variant 1, mRNA [NM_001008540]	1.65601e-15	26.6302
A_23_P32577	DACH1	NM_080759	Homo sapiens dachshund homolog 1 (Drosophila) (DACH1), transcript variant 1, mRNA [NM_080759]	7.89638e-05	26.4019
A_24_P188447	ELAVL4	NM_021952	Homo sapiens ELAV (embryonic lethal, abnormal vision, Drosophila)-like 4 (Hu antigen D) (ELAVL4), mRNA [NM_021952]	9.36114e-05	26.1909
A_23_P343104	FLJ13305	NM_032180	Homo sapiens hypothetical protein FLJ13305 (FLJ13305), mRNA [NM_032180]	5.35337e-06	25.994
A_23_P386942	DIRAS1	NM_145173	Homo sapiens DIRAS family, GTP-binding RAS-like 1 (DIRAS1), mRNA [NM_145173]	7.56861e-06	25.932
A_23_P416711	ST6GALNAC3	NM_152996	Homo sapiens ST6 (alpha-N-acetyl-neuraminyl-2,3-beta-galactosyl-1,3)-N-acetylgalactosaminide alpha-2,6-sialyltransferase 3 (ST6GALNAC3), mRNA [NM_152996]	6.37637e-08	25.8709
A_23_P165372	GALNT13	NM_052917	Homo sapiens UDP-N-acetyl-alpha-D-galactosamine:polypeptide N-acetylgalactosaminyltransferase 13 (GalNAc-T13) (GALNT13), mRNA [NM_052917]	4.39448e-06	25.7296
A_23_P145824	PPP1R9A	NM_017650	Homo sapiens protein phosphatase 1, regulatory (inhibitor) subunit 9A (PPP1R9A), mRNA [NM_017650]	1.35491e-10	25.5959
A_23_P200015	AK5	NM_174858	Homo sapiens adenylate kinase 5 (AK5), transcript variant 1, mRNA [NM_174858]	5.89903e-10	25.2977
A_23_P257583	DENND2A	NM_015689	Homo sapiens DENN/MADD domain containing 2A (DENND2A), mRNA [NM_015689]	7.66047e-10	25.2178
A_23_P14798	NEO1	NM_002499	Homo sapiens neogenin homolog 1 (chicken) (NEO1), mRNA [NM_002499]	2.80587e-08	25.1206
A_23_P82503	PEG10	NM_001040152	Homo sapiens paternally expressed 10 (PEG10), transcript variant 2, mRNA [NM_001040152]	1.48304e-09	25.04
A_24_P86993	JAM3	NM_032801	Homo sapiens junctional adhesion molecule 3 (JAM3), mRNA [NM_032801]	6.04282e-10	24.8226
A_23_P121480	CD200	NM_001004196	Homo sapiens CD200 molecule (CD200), transcript variant 2, mRNA [NM_001004196]	1.58709e-10	24.3617
A_24_P257336	POPDC2	NM_022135	Homo sapiens popeye domain containing 2 (POPDC2), mRNA [NM_022135]	5.5057e-06	24.2474
A_23_P83579	ARNT2	NM_014862	Homo sapiens aryl-hydrocarbon receptor nuclear translocator 2 (ARNT2), mRNA [NM_014862]	2.09518e-09	23.9814
A_23_P14853	LTK	NM_002344	Homo sapiens leukocyte tyrosine kinase (LTK), transcript variant 1, mRNA [NM_002344]	2.06978e-09	23.9389
A_23_P116642	SLC26A10	NM_133489	Homo sapiens solute carrier family 26, member 10 (SLC26A10), transcript variant 2, mRNA [NM_133489]	1.02787e-09	23.896
A_32_P136295	GNG7	NM_052847	Homo sapiens guanine nucleotide binding protein (G protein), gamma 7 (GNG7), mRNA [NM_052847]	2.49295e-10	23.4848
A_24_P344961	AMOT	NM_133265	Homo sapiens angiomotin (AMOT), mRNA [NM_133265]	1.22022e-13	23.4502
A_32_P305020	LOC200169	AK074383	Homo sapiens cDNA FLJ23803 fis, clone HEP22811. [AK074383]	1.92124e-05	23.4268
A_23_P64879	KCNJ8	NM_004982	Homo sapiens potassium inwardly-rectifying channel, subfamily J, member 8 (KCNJ8), mRNA [NM_004982]	7.5351e-10	23.3186
A_24_P343695	RET	NM_020630	Homo sapiens ret proto-oncogene (multiple endocrine neoplasia and medullary thyroid carcinoma 1, Hirschsprung disease) (RET), transcript variant 4, mRNA [NM_020630]	1.67936e-14	23.3087
A_23_P367618	ZIC1	NM_003412	Homo sapiens Zic family member 1 (odd-paired homolog, Drosophila) (ZIC1), mRNA [NM_003412]	6.90564e-09	23.1428
A_32_P174164	LOC441601	NR_003034	Homo sapiens septin 7 pseudogene (LOC441601) on chromosome 11 [NR_003034]	7.76734e-14	22.8092
A_23_P13713	PRPH	NM_006262	Homo sapiens peripherin (PRPH), mRNA [NM_006262]	0.00183029	22.8005
A_23_P146849	APBA2	NM_005503	Homo sapiens amyloid beta (A4) precursor protein-binding, family A, member 2 (X11-like) (APBA2), mRNA [NM_005503]	8.07243e-11	22.3047
A_24_P242204	SEPT6	NM_145799	Homo sapiens septin 6 (SEPT6), transcript variant I, mRNA [NM_145799]	8.64692e-11	22.2732
A_23_P259741	SATB1	NM_002971	Homo sapiens special AT-rich sequence binding protein 1 (binds to nuclear matrix/scaffold-associating DNA's) (SATB1), mRNA [NM_002971]	4.23358e-07	22.1936
A_24_P289954	RGAG4	NM_001024455	Homo sapiens retrotransposon gag domain containing 4 (RGAG4), mRNA [NM_001024455]	5.44685e-10	22.1243
A_23_P22422	PNMA3	NM_013364	Homo sapiens paraneoplastic antigen MA3 (PNMA3), mRNA [NM_013364]	6.39153e-11	22.0965
A_23_P159974	KLHL13	NM_033495	Homo sapiens kelch-like 13 (Drosophila) (KLHL13), mRNA [NM_033495]	1.19708e-08	21.9993
A_23_P76538	TESC	NM_017899	Homo sapiens tescalcin (TESC), mRNA [NM_017899]	1.89315e-11	21.8384
A_23_P10902	FRZB	NM_001463	Homo sapiens frizzled-related protein (FRZB), mRNA [NM_001463]	2.01213e-11	21.8306
A_23_P57417	MMP11	NM_005940	Homo sapiens matrix metallopeptidase 11 (stromelysin 3) (MMP11), mRNA [NM_005940]	3.91396e-07	21.8168
A_23_P365614	NOTCH4	NM_004557	Homo sapiens Notch homolog 4 (Drosophila) (NOTCH4), mRNA [NM_004557]	0.000117964	21.7379
A_23_P109122	RP5-860F19.3	BC054347	Homo sapiens KIAA1442 protein, mRNA (cDNA clone IMAGE:5502800), complete cds. [BC054347]	3.95102e-06	21.7045
A_23_P98974	LGR5	NM_003667	Homo sapiens leucine-rich repeat-containing G protein-coupled receptor 5 (LGR5), mRNA [NM_003667]	4.29959e-10	21.6879
A_24_P190873	C1orf76	NM_173509	Homo sapiens chromosome 1 open reading frame 76 (C1orf76), mRNA [NM_173509]	7.16993e-10	21.6657
A_23_P400449	KIAA1576	NM_020927	Homo sapiens KIAA1576 protein (KIAA1576), mRNA [NM_020927]	3.01005e-10	21.6561
A_23_P19182	REEP2	NM_016606	Homo sapiens receptor accessory protein 2 (REEP2), mRNA [NM_016606]	0.000666624	21.5362
A_23_P93787	HGF	NM_001010931	Homo sapiens hepatocyte growth factor (hepapoietin A; scatter factor) (HGF), transcript variant 2, mRNA [NM_001010931]	1.07486e-14	21.4818
A_32_P148538	LPPR4	NM_014839	Homo sapiens plasticity related gene 1 (LPPR4), mRNA [NM_014839]	1.29875e-10	21.4602
A_23_P79622	FKBP7	NM_016105	Homo sapiens FK506 binding protein 7 (FKBP7), transcript variant 1, mRNA [NM_016105]	2.31199e-05	21.151
A_24_P412734	PRSS36	NM_173502	Homo sapiens protease, serine, 36 (PRSS36), mRNA [NM_173502]	0.00371592	21.1204
A_23_P50946	RAMP1	NM_005855	Homo sapiens receptor (calcitonin) activity modifying protein 1 (RAMP1), mRNA [NM_005855]	5.64568e-05	20.8627
A_24_P62530	RHOU	NM_021205	Homo sapiens ras homolog gene family, member U (RHOU), mRNA [NM_021205]	2.09113e-11	20.6065
A_23_P25150	HOXC9	NM_006897	Homo sapiens homeobox C9 (HOXC9), mRNA [NM_006897]	7.51941e-05	20.5138
A_23_P101480	MAST1	NM_014975	Homo sapiens microtubule associated serine/threonine kinase 1 (MAST1), mRNA [NM_014975]	1.00772e-07	20.4935
A_23_P140876	ABCA3	NM_001089	Homo sapiens ATP-binding cassette, sub-family A (ABC1), member 3 (ABCA3), mRNA [NM_001089]	0.00133117	20.3571
A_23_P10121	SFRP1	NM_003012	Homo sapiens secreted frizzled-related protein 1 (SFRP1), mRNA [NM_003012]	0.000108319	20.158
A_23_P166087	RASSF2	NM_014737	Homo sapiens Ras association (RalGDS/AF-6) domain family 2 (RASSF2), transcript variant 1, mRNA [NM_014737]	5.25258e-11	20.1327
A_23_P251795	GPC2	NM_152742	Homo sapiens glypican 2 (cerebroglycan) (GPC2), mRNA [NM_152742]	1.85714e-08	20.1206
A_23_P73809	LRCH2	NM_020871	Homo sapiens leucine-rich repeats and calponin homology (CH) domain containing 2 (LRCH2), mRNA [NM_020871]	1.1011e-05	19.9643
A_23_P9402	CNTFR	NM_147164	Homo sapiens ciliary neurotrophic factor receptor (CNTFR), transcript variant 1, mRNA [NM_147164]	7.77728e-11	19.957
A_23_P27332	TCF4	NM_003199	Homo sapiens transcription factor 4 (TCF4), mRNA [NM_003199]	0.00398738	19.9425
A_23_P205057	PCDH17	NM_001040429	Homo sapiens protocadherin 17 (PCDH17), mRNA [NM_001040429]	4.92039e-06	19.934
A_23_P139965	C13orf21	NM_001010897	Homo sapiens chromosome 13 open reading frame 21 (C13orf21), mRNA [NM_001010897]	1.79273e-06	19.9054
A_23_P105442	GRASP	NM_181711	Homo sapiens GRP1 (general receptor for phosphoinositides 1)-associated scaffold protein (GRASP), mRNA [NM_181711]	1.25713e-10	19.8459
A_23_P215048	KIAA0408	NM_014702	Homo sapiens KIAA0408 (KIAA0408), mRNA [NM_014702]	6.12452e-07	19.7334
A_23_P500328	DCX	NM_000555	Homo sapiens doublecortex; lissencephaly, X-linked (doublecortin) (DCX), transcript variant 1, mRNA [NM_000555]	1.31273e-11	19.6735
A_23_P58588	SLIT3	NM_003062	Homo sapiens slit homolog 3 (Drosophila) (SLIT3), mRNA [NM_003062]	8.70363e-05	19.6716
A_24_P944640	ENAH	NM_018212	Homo sapiens enabled homolog (Drosophila) (ENAH), transcript variant 2, mRNA [NM_018212]	2.77268e-07	19.519
A_24_P943263	RASA4	NM_006989	Homo sapiens RAS p21 protein activator 4 (RASA4), mRNA [NM_006989]	0.000315571	19.4893
A_24_P57631	GPC3	NM_004484	Homo sapiens glypican 3 (GPC3), mRNA [NM_004484]	3.12656e-11	19.1915
A_23_P42975	PRKAR2B	NM_002736	Homo sapiens protein kinase, cAMP-dependent, regulatory, type II, beta (PRKAR2B), mRNA [NM_002736]	6.17965e-09	18.7217
A_23_P30294	CDO1	NM_001801	Homo sapiens cysteine dioxygenase, type I (CDO1), mRNA [NM_001801]	1.78094e-11	18.6603
A_23_P57709	PCOLCE2	NM_013363	Homo sapiens procollagen C-endopeptidase enhancer 2 (PCOLCE2), mRNA [NM_013363]	4.17415e-06	18.6184
A_23_P97923	PHYHIPL	NM_032439	Homo sapiens phytanoyl-CoA 2-hydroxylase interacting protein-like (PHYHIPL), mRNA [NM_032439]	6.46777e-05	18.5205
A_23_P65779	STRA6	NM_022369	Homo sapiens stimulated by retinoic acid gene 6 homolog (mouse) (STRA6), mRNA [NM_022369]	0.00129164	18.4786
A_24_P149036	DPYSL3	NM_001387	Homo sapiens dihydropyrimidinase-like 3 (DPYSL3), mRNA [NM_001387]	3.46815e-07	18.459
A_24_P48069	DOK4	NM_018110	Homo sapiens docking protein 4 (DOK4), mRNA [NM_018110]	9.86157e-12	18.4561
A_23_P252556	BAI3	NM_001704	Homo sapiens brain-specific angiogenesis inhibitor 3 (BAI3), mRNA [NM_001704]	2.53006e-13	18.4474
A_23_P202327	ADAM12	NM_003474	Homo sapiens ADAM metallopeptidase domain 12 (meltrin alpha) (ADAM12), transcript variant 1, mRNA [NM_003474]	1.8539e-10	18.4293
A_23_P167818	C6orf60	NM_024581	Homo sapiens chromosome 6 open reading frame 60 (C6orf60), mRNA [NM_024581]	1.79974e-12	18.4197
A_23_P156431	MAN1A1	NM_005907	Homo sapiens mannosidase, alpha, class 1A, member 1 (MAN1A1), mRNA [NM_005907]	1.68933e-10	18.2991
A_24_P162226	RIMBP2	NM_015347	Homo sapiens RIMS binding protein 2 (RIMBP2), mRNA [NM_015347]	3.65803e-09	18.2764
A_23_P83298	PRRX2	NM_016307	Homo sapiens paired related homeobox 2 (PRRX2), mRNA [NM_016307]	8.52332e-07	18.084
A_23_P120667	JAM2	NM_021219	Homo sapiens junctional adhesion molecule 2 (JAM2), mRNA [NM_021219]	2.32474e-09	18.073
A_23_P217384	ANTXR1	NM_053034	Homo sapiens anthrax toxin receptor 1 (ANTXR1), transcript variant 2, mRNA [NM_053034]	5.71703e-09	18.0401
A_23_P372834	AQP1	NM_198098	Homo sapiens aquaporin 1 (Colton blood group) (AQP1), mRNA [NM_198098]	1.91714e-08	17.9385
A_32_P24122	STMN3	NM_015894	Homo sapiens stathmin-like 3 (STMN3), mRNA [NM_015894]	9.71473e-07	17.8953
A_32_P27046	CHGA	NM_001275	Homo sapiens chromogranin A (parathyroid secretory protein 1) (CHGA), mRNA [NM_001275]	1.23602e-11	17.7476
A_23_P15450	TMEM100	NM_018286	Homo sapiens transmembrane protein 100 (TMEM100), mRNA [NM_018286]	6.38176e-06	17.7411
A_23_P122959	KIAA0644	NM_014817	Homo sapiens KIAA0644 gene product (KIAA0644), mRNA [NM_014817]	3.59036e-06	17.7124
A_23_P37685	C16orf30	NM_024600	Homo sapiens chromosome 16 open reading frame 30 (C16orf30), mRNA [NM_024600]	2.70638e-09	17.6639
A_24_P167654	SLC8A3	NM_183002	Homo sapiens solute carrier family 8 (sodium-calcium exchanger), member 3 (SLC8A3), transcript variant c, mRNA [NM_183002]	0.000586659	17.593
A_23_P351667	ADAM23	NM_003812	Homo sapiens ADAM metallopeptidase domain 23 (ADAM23), mRNA [NM_003812]	0.000615993	17.5292
A_24_P248185	C12orf53	NM_153685	Homo sapiens chromosome 12 open reading frame 53 (C12orf53), mRNA [NM_153685]	2.58019e-06	17.5126
A_23_P315320	IL27	NM_145659	Homo sapiens interleukin 27 (IL27), mRNA [NM_145659]	3.33232e-05	17.4064
A_23_P115417	RGL1	NM_015149	Homo sapiens ral guanine nucleotide dissociation stimulator-like 1 (RGL1), mRNA [NM_015149]	1.62331e-09	17.2303
A_23_P323180	HOXD3	NM_006898	Homo sapiens homeobox D3 (HOXD3), mRNA [NM_006898]	1.95823e-07	17.2174
A_24_P82200	MEIS2	NM_170676	Homo sapiens Meis1, myeloid ecotropic viral integration site 1 homolog 2 (mouse) (MEIS2), transcript variant d, mRNA [NM_170676]	2.46889e-08	17.1183
A_23_P147025	RAB33A	NM_004794	Homo sapiens RAB33A, member RAS oncogene family (RAB33A), mRNA [NM_004794]	6.63787e-06	16.9263
A_23_P205746	EML1	NM_001008707	Homo sapiens echinoderm microtubule associated protein like 1 (EML1), transcript variant 1, mRNA [NM_001008707]	0.00297602	16.8633
A_23_P384761	GATA4	NM_002052	Homo sapiens GATA binding protein 4 (GATA4), mRNA [NM_002052]	1.00526e-08	16.7717
A_23_P100660	SERPINF1	NM_002615	Homo sapiens serpin peptidase inhibitor, clade F (alpha-2 antiplasmin, pigment epithelium derived factor), member 1 (SERPINF1), mRNA [NM_002615]	5.5711e-07	16.6697
A_23_P45324	TMEM35	NM_021637	Homo sapiens transmembrane protein 35 (TMEM35), mRNA [NM_021637]	2.80913e-05	16.3703
A_23_P1833	B3GAT1	NM_018644	Homo sapiens beta-1,3-glucuronyltransferase 1 (glucuronosyltransferase P) (B3GAT1), transcript variant 1, mRNA [NM_018644]	4.77161e-09	16.3556
A_23_P429977	KCNQ1	NM_000218	Homo sapiens potassium voltage-gated channel, KQT-like subfamily, member 1 (KCNQ1), transcript variant 1, mRNA [NM_000218]	3.17288e-12	16.2284
A_32_P98423	C5orf13	NM_004772	Homo sapiens chromosome 5 open reading frame 13 (C5orf13), mRNA [NM_004772]	4.68926e-11	16.2169
A_23_P92710	RHOBTB3	NM_014899	Homo sapiens Rho-related BTB domain containing 3 (RHOBTB3), mRNA [NM_014899]	4.29933e-05	16.1995
A_23_P23346	MLLT11	NM_006818	Homo sapiens myeloid/lymphoid or mixed-lineage leukemia (trithorax homolog, Drosophila); translocated to, 11 (MLLT11), mRNA [NM_006818]	8.48344e-05	16.1968
A_24_P366315	KIF21A	NM_017641	Homo sapiens kinesin family member 21A (KIF21A), mRNA [NM_017641]	1.10873e-08	16.0841
A_23_P15889	CBLN2	NM_182511	Homo sapiens cerebellin 2 precursor (CBLN2), mRNA [NM_182511]	1.15314e-09	16.0378
A_23_P98645	DCHS1	NM_003737	Homo sapiens dachsous 1 (Drosophila) (DCHS1), mRNA [NM_003737]	2.78694e-09	16.0013
A_23_P500892	TUB	NM_003320	Homo sapiens tubby homolog (mouse) (TUB), transcript variant 1, mRNA [NM_003320]	4.61749e-05	15.9888
A_23_P78944	AMH	NM_000479	Homo sapiens anti-Mullerian hormone (AMH), mRNA [NM_000479]	2.33472e-08	15.953
A_23_P381368	HOXD10	NM_002148	Homo sapiens homeobox D10 (HOXD10), mRNA [NM_002148]	2.28281e-11	15.9441
A_23_P61406	SHC3	NM_016848	Homo sapiens SHC (Src homology 2 domain containing) transforming protein 3 (SHC3), mRNA [NM_016848]	1.56873e-08	15.8538
A_23_P52727	NASP	NM_172164	Homo sapiens nuclear autoantigenic sperm protein (histone-binding) (NASP), transcript variant 1, mRNA [NM_172164]	7.6365e-08	15.7574
A_23_P35444	INA	NM_032727	Homo sapiens internexin neuronal intermediate filament protein, alpha (INA), mRNA [NM_032727]	1.1581e-09	15.6822
A_24_P11315	OLFML3	NM_020190	Homo sapiens olfactomedin-like 3 (OLFML3), mRNA [NM_020190]	2.36372e-07	15.609
A_23_P340263	RNF175	NM_173662	Homo sapiens ring finger protein 175 (RNF175), mRNA [NM_173662]	2.46211e-11	15.5192
A_23_P24129	DKK1	NM_012242	Homo sapiens dickkopf homolog 1 (Xenopus laevis) (DKK1), mRNA [NM_012242]	0.00330629	15.514
A_32_P155666	ECEL1	NM_004826	Homo sapiens endothelin converting enzyme-like 1 (ECEL1), mRNA [NM_004826]	2.42118e-11	15.352
A_32_P79434	PTPRN2	NM_002847	Homo sapiens protein tyrosine phosphatase, receptor type, N polypeptide 2 (PTPRN2), transcript variant 1, mRNA [NM_002847]	8.34845e-10	15.2406
A_24_P252364	NRCAM	NM_005010	Homo sapiens neuronal cell adhesion molecule (NRCAM), transcript variant 2, mRNA [NM_005010]	0.00369036	15.1768
A_23_P313828	PRR6	NM_181716	Homo sapiens proline rich 6 (PRR6), mRNA [NM_181716]	4.02904e-10	15.1606
A_23_P201386	DDAH1	NM_012137	Homo sapiens dimethylarginine dimethylaminohydrolase 1 (DDAH1), mRNA [NM_012137]	1.75765e-06	15.1319
A_23_P128084	ITGA7	NM_002206	Homo sapiens integrin, alpha 7 (ITGA7), mRNA [NM_002206]	4.27279e-11	15.0684
A_23_P171296	MPP1	NM_002436	Homo sapiens membrane protein, palmitoylated 1, 55kDa (MPP1), mRNA [NM_002436]	1.90183e-08	15.0631
A_23_P43095	ZFHX4	NM_024721	Homo sapiens zinc finger homeodomain 4 (ZFHX4), mRNA [NM_024721]	8.65683e-10	15.062
A_23_P134347	CPVL	NM_031311	Homo sapiens carboxypeptidase, vitellogenic-like (CPVL), transcript variant 1, mRNA [NM_031311]	2.87511e-09	14.9853
A_23_P118722	ASGR1	NM_001671	Homo sapiens asialoglycoprotein receptor 1 (ASGR1), mRNA [NM_001671]	7.20713e-05	14.9701
A_23_P158593	COL5A1	NM_000093	Homo sapiens collagen, type V, alpha 1 (COL5A1), mRNA [NM_000093]	3.83929e-08	14.8716
A_23_P58770	HAND1	NM_004821	Homo sapiens heart and neural crest derivatives expressed 1 (HAND1), mRNA [NM_004821]	1.69407e-09	14.8515
A_32_P129269	KIAA1909	NM_052909	Homo sapiens KIAA1909 protein (KIAA1909), mRNA [NM_052909]	2.56902e-11	14.849
A_23_P203743	FZD4	NM_012193	Homo sapiens frizzled homolog 4 (Drosophila) (FZD4), mRNA [NM_012193]	0.000104674	14.7909
A_23_P310	MARCKSL1	NM_023009	Homo sapiens MARCKS-like 1 (MARCKSL1), mRNA [NM_023009]	0.000441948	14.7266
A_24_P237270	ADORA2A	NM_000675	Homo sapiens adenosine A2a receptor (ADORA2A), mRNA [NM_000675]	2.13822e-09	14.6285
A_23_P210756	SNAP25	NM_003081	Homo sapiens synaptosomal-associated protein, 25kDa (SNAP25), transcript variant 1, mRNA [NM_003081]	3.72229e-10	14.5543
A_23_P385105	PLCD4	NM_032726	Homo sapiens phospholipase C, delta 4 (PLCD4), mRNA [NM_032726]	2.36923e-06	14.5394
A_23_P59375	ID4	NM_001546	Homo sapiens inhibitor of DNA binding 4, dominant negative helix-loop-helix protein (ID4), mRNA [NM_001546]	0.00629794	14.4007
A_24_P70303	CACNG4	NM_014405	Homo sapiens calcium channel, voltage-dependent, gamma subunit 4 (CACNG4), mRNA [NM_014405]	5.26056e-12	14.2945
A_23_P127220	DNAJC12	NM_021800	Homo sapiens DnaJ (Hsp40) homolog, subfamily C, member 12 (DNAJC12), transcript variant 1, mRNA [NM_021800]	8.61751e-07	14.2441
A_32_P88415	MYCN	NM_005378	Homo sapiens v-myc myelocytomatosis viral related oncogene, neuroblastoma derived (avian) (MYCN), mRNA [NM_005378]	2.39061e-09	14.1832
A_23_P68487	BMP7	NM_001719	Homo sapiens bone morphogenetic protein 7 (osteogenic protein 1) (BMP7), mRNA [NM_001719]	3.23322e-09	14.1542
A_23_P102351	CHST10	NM_004854	Homo sapiens carbohydrate sulfotransferase 10 (CHST10), mRNA [NM_004854]	4.22506e-11	14.1178
A_23_P167401	PCDHB11	NM_018931	Homo sapiens protocadherin beta 11 (PCDHB11), mRNA [NM_018931]	3.27815e-06	14.0968
A_23_P114947	RGS2	NM_002923	Homo sapiens regulator of G-protein signalling 2, 24kDa (RGS2), mRNA [NM_002923]	2.54954e-06	14.0476
A_23_P65812	SMAD6	NM_005585	Homo sapiens SMAD, mothers against DPP homolog 6 (Drosophila) (SMAD6), mRNA [NM_005585]	3.25485e-07	13.9055
A_23_P19482	DDAH2	NM_013974	Homo sapiens dimethylarginine dimethylaminohydrolase 2 (DDAH2), mRNA [NM_013974]	1.36096e-06	13.8311
A_23_P88880	ZNF423	NM_015069	Homo sapiens zinc finger protein 423 (ZNF423), mRNA [NM_015069]	8.6946e-13	13.8238
A_23_P60146	PDGFRL	NM_006207	Homo sapiens platelet-derived growth factor receptor-like (PDGFRL), mRNA [NM_006207]	7.28169e-08	13.8185
A_24_P376391	PLXND1	NM_015103	Homo sapiens plexin D1 (PLXND1), mRNA [NM_015103]	0.000117718	13.7742
A_23_P163711	FAM57B	NM_031478	Homo sapiens family with sequence similarity 57, member B (FAM57B), mRNA [NM_031478]	4.09632e-12	13.7014
A_32_P172864	FAM101A	NM_181709	Homo sapiens family with sequence similarity 101, member A (FAM101A), mRNA [NM_181709]	2.09844e-07	13.6398
A_32_P438767	NEUROG2	NM_024019	Homo sapiens neurogenin 2 (NEUROG2), mRNA [NM_024019]	3.90774e-10	13.6361
A_32_P310335	ATCAY	NM_033064	Homo sapiens ataxia, cerebellar, Cayman type (caytaxin) (ATCAY), mRNA [NM_033064]	8.60465e-10	13.5833
A_23_P26557	C16orf59	NM_025108	Homo sapiens chromosome 16 open reading frame 59 (C16orf59), mRNA [NM_025108]	0.00615914	13.5074
A_23_P132185	SCARF2	NM_153334	Homo sapiens scavenger receptor class F, member 2 (SCARF2), transcript variant 1, mRNA [NM_153334]	8.78517e-05	13.4656
A_23_P131183	GBX2	NM_001485	Homo sapiens gastrulation brain homeobox 2 (GBX2), mRNA [NM_001485]	1.50938e-05	13.4549
A_23_P135381	SP5	NM_001003845	Homo sapiens Sp5 transcription factor (SP5), mRNA [NM_001003845]	6.41045e-07	13.4091
A_23_P16953	HTR2B	NM_000867	Homo sapiens 5-hydroxytryptamine (serotonin) receptor 2B (HTR2B), mRNA [NM_000867]	6.41867e-12	13.2457
A_32_P103508	LOC286025	AK096022	Homo sapiens cDNA FLJ38703 fis, clone KIDNE2002265. [AK096022]	2.39413e-09	13.1532
A_23_P144369	NAP1L5	NM_153757	Homo sapiens nucleosome assembly protein 1-like 5 (NAP1L5), mRNA [NM_153757]	2.3727e-05	13.0292
A_24_P224488	MAP9	NM_001039580	Homo sapiens microtubule-associated protein 9 (MAP9), mRNA [NM_001039580]	1.96328e-08	13.025
A_23_P348737	NR2F1	NM_005654	Homo sapiens nuclear receptor subfamily 2, group F, member 1 (NR2F1), mRNA [NM_005654]	0.00290495	12.9393
A_23_P112726	SCN9A	NM_002977	Homo sapiens sodium channel, voltage-gated, type IX, alpha (SCN9A), mRNA [NM_002977]	0.00415962	12.891
A_23_P58228	ODAM	NM_017855	Homo sapiens odontogenic, ameloblast asssociated (ODAM), mRNA [NM_017855]	0.000167722	12.8461
A_23_P32955	MEIS3	NM_001009813	Homo sapiens Meis1, myeloid ecotropic viral integration site 1 homolog 3 (mouse) (MEIS3), transcript variant 2, mRNA [NM_001009813]	5.10771e-09	12.8355
A_23_P96291	MAGEA1	NM_004988	Homo sapiens melanoma antigen family A, 1 (directs expression of antigen MZ2-E) (MAGEA1), mRNA [NM_004988]	1.73856e-12	12.748
A_23_P14157	DZIP1	NM_198968	Homo sapiens DAZ interacting protein 1 (DZIP1), transcript variant 2, mRNA [NM_198968]	0.000112775	12.6917
A_23_P87742	HOM-TES-103	NM_080731	Homo sapiens hypothetical protein LOC25900, isoform 3 (HOM-TES-103), transcript variant 3, mRNA [NM_080731]	6.31315e-07	12.676
A_23_P215900	SCARA3	NM_182826	Homo sapiens scavenger receptor class A, member 3 (SCARA3), transcript variant 2, mRNA [NM_182826]	0.000249539	12.505
A_23_P417646	SV2C	AB028977	Homo sapiens mRNA for KIAA1054 protein, partial cds. [AB028977]	5.03095e-10	12.4827
A_23_P43337	FREM1	NM_144966	Homo sapiens FRAS1 related extracellular matrix 1 (FREM1), mRNA [NM_144966]	4.01133e-10	12.4473
A_24_P325992	LIFR	NM_002310	Homo sapiens leukemia inhibitory factor receptor alpha (LIFR), mRNA [NM_002310]	1.31758e-08	12.4359
A_24_P236091	ENO2	NM_001975	Homo sapiens enolase 2 (gamma, neuronal) (ENO2), mRNA [NM_001975]	5.08768e-06	12.3979
A_23_P435636	DAND5	NM_152654	Homo sapiens DAN domain family, member 5 (DAND5), mRNA [NM_152654]	1.90402e-07	12.3899
A_32_P57810	RNF157	NM_052916	Homo sapiens ring finger protein 157 (RNF157), mRNA [NM_052916]	2.21398e-09	12.2422
A_23_P44794	RAB3C	NM_138453	Homo sapiens RAB3C, member RAS oncogene family (RAB3C), mRNA [NM_138453]	1.46416e-07	12.2334
A_23_P51729	GJA12	NM_020435	Homo sapiens gap junction protein, alpha 12, 47kDa (GJA12), mRNA [NM_020435]	2.36847e-10	12.207
A_24_P255471	SYT9	NM_175733	Homo sapiens synaptotagmin IX (SYT9), mRNA [NM_175733]	1.98045e-09	12.1126
A_23_P143981	FBLN2	NM_001004019	Homo sapiens fibulin 2 (FBLN2), transcript variant 1, mRNA [NM_001004019]	1.69151e-11	12.067
A_23_P383009	HS6ST3	NM_153456	Homo sapiens heparan sulfate 6-O-sulfotransferase 3 (HS6ST3), mRNA [NM_153456]	6.54653e-09	12.0059
A_23_P148584	DOCK11	NM_144658	Homo sapiens dedicator of cytokinesis 11 (DOCK11), mRNA [NM_144658]	4.28407e-07	12.0053
A_24_P222516	KIAA1211	AK126014	Homo sapiens cDNA FLJ44026 fis, clone TESTI4026762. [AK126014]	7.00573e-11	11.9335
A_23_P352266	BAX	NM_138764	Homo sapiens BCL2-associated X protein (BAX), transcript variant epsilon, mRNA [NM_138764]	5.69947e-12	11.9132
A_24_P234415	STAC	NM_003149	Homo sapiens SH3 and cysteine rich domain (STAC), mRNA [NM_003149]	0.000792421	11.858
A_23_P74042	LPHN2	NM_012302	Homo sapiens latrophilin 2 (LPHN2), mRNA [NM_012302]	0.000681714	11.8282
A_23_P145606	CHD7	NM_017780	Homo sapiens chromodomain helicase DNA binding protein 7 (CHD7), mRNA [NM_017780]	0.000432895	11.7883
A_23_P88033	FGF14	NM_175929	Homo sapiens fibroblast growth factor 14 (FGF14), transcript variant 2, mRNA [NM_175929]	4.65934e-10	11.7866
A_23_P59960	CRISPLD1	NM_031461	Homo sapiens cysteine-rich secretory protein LCCL domain containing 1 (CRISPLD1), mRNA [NM_031461]	4.88016e-06	11.7471
A_24_P299318	FAM101B	BC014203	Homo sapiens family with sequence similarity 101, member B, mRNA (cDNA clone IMAGE:4564684). [BC014203]	3.57907e-05	11.7293
A_23_P154500	DNMT3A	NM_175629	Homo sapiens DNA (cytosine-5-)-methyltransferase 3 alpha (DNMT3A), transcript variant 1, mRNA [NM_175629]	3.56664e-07	11.7154
A_23_P71855	C5	NM_001735	Homo sapiens complement component 5 (C5), mRNA [NM_001735]	1.93271e-11	11.7039
A_24_P166407	HIST1H4B	NM_003544	Homo sapiens histone 1, H4b (HIST1H4B), mRNA [NM_003544]	9.46387e-05	11.6661
A_24_P380734	SDC2	NM_002998	Homo sapiens syndecan 2 (heparan sulfate proteoglycan 1, cell surface-associated, fibroglycan) (SDC2), mRNA [NM_002998]	1.94657e-07	11.6592
A_23_P110851	TERT	NM_198253	Homo sapiens telomerase reverse transcriptase (TERT), transcript variant 1, mRNA [NM_198253]	2.18722e-10	11.5872
A_23_P155900	NPFFR2	NM_053036	Homo sapiens neuropeptide FF receptor 2 (NPFFR2), transcript variant 2, mRNA [NM_053036]	1.91628e-05	11.5041
A_23_P70480	HIST1H4L	NM_003546	Homo sapiens histone 1, H4l (HIST1H4L), mRNA [NM_003546]	0.000155442	11.4933
A_24_P190168	TMEM97	NM_014573	Homo sapiens transmembrane protein 97 (TMEM97), mRNA [NM_014573]	0.00467525	11.4282
A_23_P34144	MAGEH1	NM_014061	Homo sapiens melanoma antigen family H, 1 (MAGEH1), mRNA [NM_014061]	0.00103477	11.4162
A_23_P122852	SMARCD3	NM_003078	Homo sapiens SWI/SNF related, matrix associated, actin dependent regulator of chromatin, subfamily d, member 3 (SMARCD3), transcript variant 2, mRNA [NM_003078]	0.000290605	11.4083
A_23_P83134	GAS1	NM_002048	Homo sapiens growth arrest-specific 1 (GAS1), mRNA [NM_002048]	3.65764e-10	11.3958
A_23_P213699	NOC2L	BC009786	Homo sapiens nucleolar complex associated 2 homolog (S. cerevisiae), mRNA (cDNA clone IMAGE:4274902), partial cds. [BC009786]	3.80844e-07	11.372
A_23_P99661	FLJ10357	NM_018071	Homo sapiens hypothetical protein FLJ10357 (FLJ10357), mRNA [NM_018071]	5.72024e-05	11.3464
A_23_P10647	CYP2U1	NM_183075	Homo sapiens cytochrome P450, family 2, subfamily U, polypeptide 1 (CYP2U1), mRNA [NM_183075]	0.000197326	11.3433
A_23_P217326	FHL1	NM_001449	Homo sapiens four and a half LIM domains 1 (FHL1), mRNA [NM_001449]	0.000129872	11.3187
A_24_P77968	FLNC	NM_001458	Homo sapiens filamin C, gamma (actin binding protein 280) (FLNC), mRNA [NM_001458]	2.65025e-09	11.2262
A_23_P129695	VASN	NM_138440	Homo sapiens vasorin (VASN), mRNA [NM_138440]	3.26231e-07	11.2187
A_23_P48585	SALL2	NM_005407	Homo sapiens sal-like 2 (Drosophila) (SALL2), mRNA [NM_005407]	0.00288938	11.1935
A_23_P100642	PNMT	NM_002686	Homo sapiens phenylethanolamine N-methyltransferase (PNMT), mRNA [NM_002686]	3.5784e-10	11.1518
A_23_P114783	PARP1	NM_001618	Homo sapiens poly (ADP-ribose) polymerase family, member 1 (PARP1), mRNA [NM_001618]	0.00308711	11.1265
A_23_P352535	PPP1R16B	NM_015568	Homo sapiens protein phosphatase 1, regulatory (inhibitor) subunit 16B (PPP1R16B), mRNA [NM_015568]	1.67576e-08	11.1053
A_32_P152195	STAC2	NM_198993	Homo sapiens SH3 and cysteine rich domain 2 (STAC2), mRNA [NM_198993]	1.58073e-11	11.0428
A_24_P13390	TMEM118	NM_032814	Homo sapiens transmembrane protein 118 (TMEM118), mRNA [NM_032814]	1.29169e-06	11.0123
A_23_P5131	ISYNA1	NM_016368	Homo sapiens myo-inositol 1-phosphate synthase A1 (ISYNA1), mRNA [NM_016368]	5.05012e-05	11.0048
A_23_P125303	IGSF1	NM_001555	Homo sapiens immunoglobulin superfamily, member 1 (IGSF1), transcript variant 1, mRNA [NM_001555]	1.04831e-11	10.9762
A_23_P904	C1orf165	NM_024603	Homo sapiens chromosome 1 open reading frame 165 (C1orf165), mRNA [NM_024603]	7.86578e-06	10.9638
A_23_P124384	SHOX2	NM_006884	Homo sapiens short stature homeobox 2 (SHOX2), transcript variant SHOX2a, mRNA [NM_006884]	2.63767e-07	10.9518
A_23_P110941	GSTA4	NM_001512	Homo sapiens glutathione S-transferase A4 (GSTA4), mRNA [NM_001512]	6.22419e-07	10.9516
A_23_P205177	F10	NM_000504	Homo sapiens coagulation factor X (F10), mRNA [NM_000504]	0.00250254	10.8603
A_23_P92042	ITPR1	NM_002222	Homo sapiens inositol 1,4,5-triphosphate receptor, type 1 (ITPR1), mRNA [NM_002222]	5.98736e-08	10.7891
A_23_P3424	RPP25	NM_017793	Homo sapiens ribonuclease P 25kDa subunit (RPP25), mRNA [NM_017793]	2.94594e-06	10.7678
A_23_P395460	KIAA1946	NM_177454	Homo sapiens KIAA1946 (KIAA1946), mRNA [NM_177454]	2.26074e-09	10.7375
A_23_P145995	GPR37	NM_005302	Homo sapiens G protein-coupled receptor 37 (endothelin receptor type B-like) (GPR37), mRNA [NM_005302]	3.91893e-11	10.7191
A_23_P20484	FGL1	NM_201553	Homo sapiens fibrinogen-like 1 (FGL1), transcript variant 4, mRNA [NM_201553]	1.76253e-10	10.7134
A_23_P31739	STMN4	NM_030795	Homo sapiens stathmin-like 4 (STMN4), mRNA [NM_030795]	3.55272e-09	10.6793
A_23_P301855	LSAMP	NM_002338	Homo sapiens limbic system-associated membrane protein (LSAMP), mRNA [NM_002338]	1.97932e-09	10.6721
A_32_P201417	RUTBC2	NM_001039948	Homo sapiens RUN and TBC1 domain containing 2 (RUTBC2), transcript variant 1, mRNA [NM_001039948]	1.61357e-11	10.6682
A_32_P117354	DKFZP686A01247	NM_014988	Homo sapiens hypothetical protein (DKFZP686A01247), mRNA [NM_014988]	0.00380817	10.6618
A_23_P121533	SPON2	NM_012445	Homo sapiens spondin 2, extracellular matrix protein (SPON2), mRNA [NM_012445]	1.27573e-09	10.6287
A_23_P21618	PDZRN3	NM_015009	Homo sapiens PDZ domain containing RING finger 3 (PDZRN3), mRNA [NM_015009]	3.34536e-07	10.6222
A_23_P6771	LMCD1	NM_014583	Homo sapiens LIM and cysteine-rich domains 1 (LMCD1), mRNA [NM_014583]	2.86056e-06	10.5982
A_23_P107322	CORO6	NM_032854	Homo sapiens coronin 6 (CORO6), mRNA [NM_032854]	1.05921e-05	10.5791
A_24_P187218	PCDH9	NM_020403	Homo sapiens protocadherin 9 (PCDH9), transcript variant 2, mRNA [NM_020403]	5.0632e-06	10.5249
A_23_P125056	BAI1	NM_001702	Homo sapiens brain-specific angiogenesis inhibitor 1 (BAI1), mRNA [NM_001702]	4.93481e-05	10.521
A_24_P251734	FSTL5	NM_020116	Homo sapiens follistatin-like 5 (FSTL5), mRNA [NM_020116]	1.26851e-05	10.5201
A_23_P3946	NT5M	NM_020201	Homo sapiens 5',3'-nucleotidase, mitochondrial (NT5M), nuclear gene encoding mitochondrial protein, mRNA [NM_020201]	1.83972e-08	10.5003
A_23_P133236	PCDHB14	NM_018934	Homo sapiens protocadherin beta 14 (PCDHB14), mRNA [NM_018934]	3.71609e-07	10.4382
A_32_P169735	TTC8	NM_144596	Homo sapiens tetratricopeptide repeat domain 8 (TTC8), transcript variant 1, mRNA [NM_144596]	1.06531e-07	10.4169
A_24_P331537	MAGEA5	NM_021049	Homo sapiens melanoma antigen family A, 5 (MAGEA5), mRNA [NM_021049]	7.95154e-11	10.3773
A_24_P402690	ITM2C	NM_030926	Homo sapiens integral membrane protein 2C (ITM2C), transcript variant 1, mRNA [NM_030926]	0.000577046	10.3457
A_23_P163087	NID2	NM_007361	Homo sapiens nidogen 2 (osteonidogen) (NID2), mRNA [NM_007361]	6.84165e-08	10.3098
A_23_P93629	TRIM24	NM_015905	Homo sapiens tripartite motif-containing 24 (TRIM24), transcript variant 1, mRNA [NM_015905]	2.99665e-08	10.2858
A_23_P212159	NUP210	NM_024923	Homo sapiens nucleoporin 210kDa (NUP210), mRNA [NM_024923]	6.21214e-05	10.2553
A_23_P36364	THY1	NM_006288	Homo sapiens Thy-1 cell surface antigen (THY1), mRNA [NM_006288]	2.24839e-08	10.2381
A_23_P67127	TMEM145	NM_173633	Homo sapiens transmembrane protein 145 (TMEM145), mRNA [NM_173633]	3.84872e-07	10.2266
A_23_P335452	C10orf56	NM_153367	Homo sapiens chromosome 10 open reading frame 56 (C10orf56), mRNA [NM_153367]	1.25369e-07	10.0303
A_23_P63541	KIF26B	AK001019	Homo sapiens cDNA FLJ10157 fis, clone HEMBA1003461. [AK001019]	1.43856e-05	10.0166
A_23_P102462	FLJ37440	NM_153214	Homo sapiens hypothetical protein FLJ37440 (FLJ37440), mRNA [NM_153214]	3.23815e-09	9.99266
A_23_P381102	CCDC74B	NM_207310	Homo sapiens coiled-coil domain containing 74B (CCDC74B), mRNA [NM_207310]	4.31198e-05	9.9389
A_23_P106117	SIX6	NM_007374	Homo sapiens sine oculis homeobox homolog 6 (Drosophila) (SIX6), mRNA [NM_007374]	1.58792e-08	9.93282
A_23_P5601	DOK1	NM_001381	Homo sapiens docking protein 1, 62kDa (downstream of tyrosine kinase 1) (DOK1), mRNA [NM_001381]	1.66685e-06	9.92393
A_32_P83845	HEY1	NM_012258	Homo sapiens hairy/enhancer-of-split related with YRPW motif 1 (HEY1), transcript variant 1, mRNA [NM_012258]	0.00012586	9.91413
A_23_P100056	RBPMS2	NM_194272	Homo sapiens RNA binding protein with multiple splicing 2 (RBPMS2), mRNA [NM_194272]	4.81961e-09	9.90555
A_32_P112493	LOC91461	NM_138370	Homo sapiens hypothetical protein BC007901 (LOC91461), mRNA [NM_138370]	2.36022e-10	9.86585
A_23_P134366	ETV1	NM_004956	Homo sapiens ets variant gene 1 (ETV1), mRNA [NM_004956]	4.47704e-07	9.86335
A_23_P303833	SCN4B	NM_174934	Homo sapiens sodium channel, voltage-gated, type IV, beta (SCN4B), mRNA [NM_174934]	3.50369e-11	9.83247
A_24_P383609	NANOS1	NM_199461	Homo sapiens nanos homolog 1 (Drosophila) (NANOS1), transcript variant 1, mRNA [NM_199461]	1.15374e-07	9.78828
A_32_P62863	SCHIP1	NM_014575	Homo sapiens schwannomin interacting protein 1 (SCHIP1), mRNA [NM_014575]	1.22095e-05	9.78358
A_23_P110903	SRrp35	NM_080743	Homo sapiens serine-arginine repressor protein (35 kDa) (SRrp35), mRNA [NM_080743]	9.86629e-09	9.77785
A_32_P152767	FLJ45187	NM_207371	Homo sapiens hypothetical protein LOC387640 (FLJ45187), mRNA [NM_207371]	2.04384e-09	9.76772
A_23_P83028	RECK	NM_021111	Homo sapiens reversion-inducing-cysteine-rich protein with kazal motifs (RECK), mRNA [NM_021111]	4.33712e-06	9.75007
A_23_P216023	ALS2CR13	NM_173511	Homo sapiens amyotrophic lateral sclerosis 2 (juvenile) chromosome region, candidate 13 (ALS2CR13), mRNA [NM_173511]	8.06271e-10	9.74405
A_23_P302207	DKFZp434J1015	AL133055	Homo sapiens mRNA; cDNA DKFZp434J1015 (from clone DKFZp434J1015). [AL133055]	6.30284e-05	9.70368
A_32_P208403	GNG2	NM_053064	Homo sapiens guanine nucleotide binding protein (G protein), gamma 2 (GNG2), mRNA [NM_053064]	9.26973e-11	9.66391
A_23_P218492	ELAVL3	NM_032281	Homo sapiens ELAV (embryonic lethal, abnormal vision, Drosophila)-like 3 (Hu antigen C) (ELAVL3), transcript variant 2, mRNA [NM_032281]	8.72548e-11	9.65519
A_23_P256033	EEF1A2	NM_001958	Homo sapiens eukaryotic translation elongation factor 1 alpha 2 (EEF1A2), mRNA [NM_001958]	0.00104643	9.6462
A_24_P100517	C9orf140	NM_178448	Homo sapiens chromosome 9 open reading frame 140 (C9orf140), mRNA [NM_178448]	0.00807626	9.61181
A_23_P105862	FRY	NM_023037	Homo sapiens furry homolog (Drosophila) (FRY), mRNA [NM_023037]	0.000855665	9.60956
A_23_P257649	RBP1	NM_002899	Homo sapiens retinol binding protein 1, cellular (RBP1), mRNA [NM_002899]	5.33696e-05	9.60463
A_23_P429383	HOXD9	NM_014213	Homo sapiens homeobox D9 (HOXD9), mRNA [NM_014213]	0.000477528	9.5698
A_23_P24414	EFEMP2	NM_016938	Homo sapiens EGF-containing fibulin-like extracellular matrix protein 2 (EFEMP2), mRNA [NM_016938]	1.89628e-05	9.56625
A_23_P142424	TMEM149	NM_024660	Homo sapiens transmembrane protein 149 (TMEM149), mRNA [NM_024660]	1.57786e-08	9.49734
A_23_P148015	AXIN2	NM_004655	Homo sapiens axin 2 (conductin, axil) (AXIN2), mRNA [NM_004655]	8.10015e-08	9.4673
A_23_P334955	C8orf13	NM_053279	Homo sapiens chromosome 8 open reading frame 13 (C8orf13), mRNA [NM_053279]	5.09784e-05	9.45166
A_24_P219474	MERTK	AK026802	Homo sapiens cDNA: FLJ23149 fis, clone LNG09335. [AK026802]	1.60177e-06	9.35501
A_24_P342312	ODZ4	AB037723	Homo sapiens mRNA for KIAA1302 protein, partial cds. [AB037723]	1.89045e-09	9.2939
A_23_P254626	SGCE	NM_003919	Homo sapiens sarcoglycan, epsilon (SGCE), mRNA [NM_003919]	2.80528e-05	9.28318
A_23_P123596	GLDC	NM_000170	Homo sapiens glycine dehydrogenase (decarboxylating) (GLDC), mRNA [NM_000170]	1.88548e-05	9.2767
A_23_P428129	CDKN1C	NM_000076	Homo sapiens cyclin-dependent kinase inhibitor 1C (p57, Kip2) (CDKN1C), mRNA [NM_000076]	0.00192239	9.22819
A_23_P76749	GALNTL1	NM_020692	Homo sapiens UDP-N-acetyl-alpha-D-galactosamine:polypeptide N-acetylgalactosaminyltransferase-like 1 (GALNTL1), mRNA [NM_020692]	2.01479e-05	9.22266
A_23_P329768	GPSM1	BC009979	Homo sapiens G-protein signalling modulator 1 (AGS3-like, C. elegans), mRNA (cDNA clone MGC:16636 IMAGE:4121647), complete cds. [BC009979]	5.91114e-07	9.19086
A_32_P157846	DUSP5P	NR_002834	Homo sapiens dual specificity phosphatase 5 pseudogene (DUSP5P) on chromosome 1 [NR_002834]	4.67867e-06	9.17849
A_23_P170636	KCNH8	NM_144633	Homo sapiens potassium voltage-gated channel, subfamily H (eag-related), member 8 (KCNH8), mRNA [NM_144633]	2.85461e-08	9.16245
A_23_P27035	TMEM98	NM_015544	Homo sapiens transmembrane protein 98 (TMEM98), transcript variant 1, mRNA [NM_015544]	0.000977941	9.1128
A_24_P230869	PRSS12	NM_003619	Homo sapiens protease, serine, 12 (neurotrypsin, motopsin) (PRSS12), mRNA [NM_003619]	1.04945e-07	9.10232
A_23_P381954	EPOR	NM_000121	Homo sapiens erythropoietin receptor (EPOR), mRNA [NM_000121]	8.65223e-06	9.10059
A_23_P25305	ASCL1	NM_004316	Homo sapiens achaete-scute complex-like 1 (Drosophila) (ASCL1), mRNA [NM_004316]	1.57501e-10	9.08905
A_23_P259292	C1QTNF5	NM_015645	Homo sapiens C1q and tumor necrosis factor related protein 5 (C1QTNF5), mRNA [NM_015645]	9.7131e-09	9.06898
A_32_P202703	LOC389831	AL713796	Homo sapiens mRNA; cDNA DKFZp667B1610 (from clone DKFZp667B1610). [AL713796]	8.08006e-07	9.05407
A_23_P358662	KIAA1712	NM_001040157	Homo sapiens KIAA1712 (KIAA1712), mRNA [NM_001040157]	8.48691e-09	9.03298
A_24_P296568	CBX1	NM_006807	Homo sapiens chromobox homolog 1 (HP1 beta homolog Drosophila ) (CBX1), mRNA [NM_006807]	5.53954e-05	9.01617
A_23_P41194	LRRC34	NM_153353	Homo sapiens leucine rich repeat containing 34 (LRRC34), mRNA [NM_153353]	2.2286e-05	8.93912
A_23_P92093	CELSR3	NM_001407	Homo sapiens cadherin, EGF LAG seven-pass G-type receptor 3 (flamingo homolog, Drosophila) (CELSR3), mRNA [NM_001407]	5.53594e-07	8.9151
A_24_P131522	ANP32E	NM_030920	Homo sapiens acidic (leucine-rich) nuclear phosphoprotein 32 family, member E (ANP32E), mRNA [NM_030920]	0.000308795	8.90442
A_23_P110569	TRIM36	NM_018700	Homo sapiens tripartite motif-containing 36 (TRIM36), transcript variant 1, mRNA [NM_018700]	6.69566e-07	8.90304
A_23_P47086	KRTAP5-8	NM_021046	Homo sapiens keratin associated protein 5-8 (KRTAP5-8), mRNA [NM_021046]	2.95471e-10	8.89127
A_23_P121602	SAP30	NM_003864	Homo sapiens Sin3A-associated protein, 30kDa (SAP30), mRNA [NM_003864]	0.0010355	8.8881
A_23_P10559	AATK	AK131529	Homo sapiens cDNA FLJ16758 fis, clone BRACE3038687, moderately similar to Homo sapiens apoptosis-associated tyrosine kinase (AATK). [AK131529]	1.6894e-05	8.88782
A_23_P171366	USP11	NM_004651	Homo sapiens ubiquitin specific peptidase 11 (USP11), mRNA [NM_004651]	1.71173e-10	8.87487
A_23_P340148	ZNF711	NM_021998	Homo sapiens zinc finger protein 711 (ZNF711), mRNA [NM_021998]	7.63587e-11	8.82659
A_23_P121676	CXXC4	NM_025212	Homo sapiens CXXC finger 4 (CXXC4), mRNA [NM_025212]	1.64521e-08	8.78894
A_32_P41254	C6orf117	NM_138409	Homo sapiens chromosome 6 open reading frame 117 (C6orf117), mRNA [NM_138409]	2.15349e-07	8.77205
A_23_P214487	HIST1H4C	NM_003542	Homo sapiens histone 1, H4c (HIST1H4C), mRNA [NM_003542]	0.00247328	8.75973
A_23_P216448	NFIB	NM_005596	Homo sapiens nuclear factor I/B (NFIB), mRNA [NM_005596]	5.40526e-08	8.7542
A_23_P142606	CRYGC	NM_020989	Homo sapiens crystallin, gamma C (CRYGC), mRNA [NM_020989]	1.14761e-10	8.70712
A_23_P130811	ZNF536	NM_014717	Homo sapiens zinc finger protein 536 (ZNF536), mRNA [NM_014717]	2.15508e-09	8.70633
A_23_P165408	KLHL23	NM_144711	Homo sapiens kelch-like 23 (Drosophila) (KLHL23), mRNA [NM_144711]	0.000478393	8.66216
A_23_P152655	ICAM2	NM_000873	Homo sapiens intercellular adhesion molecule 2 (ICAM2), mRNA [NM_000873]	3.45668e-11	8.65873
A_24_P369232	CCDC3	NM_031455	Homo sapiens coiled-coil domain containing 3 (CCDC3), mRNA [NM_031455]	3.03652e-07	8.65572
A_23_P99172	CCDC77	NM_032358	Homo sapiens coiled-coil domain containing 77 (CCDC77), mRNA [NM_032358]	9.10835e-05	8.64317
A_23_P170030	CEND1	NM_016564	Homo sapiens cell cycle exit and neuronal differentiation 1 (CEND1), mRNA [NM_016564]	3.34603e-09	8.64047
A_24_P406601	OLFM1	NM_014279	Homo sapiens olfactomedin 1 (OLFM1), transcript variant 1, mRNA [NM_014279]	0.000211582	8.63205
A_23_P147255	PCBP3	NM_020528	Homo sapiens poly(rC) binding protein 3 (PCBP3), mRNA [NM_020528]	5.79428e-09	8.62068
A_24_P322229	RASL10B	NM_033315	Homo sapiens RAS-like, family 10, member B (RASL10B), mRNA [NM_033315]	4.14823e-08	8.57329
A_32_P124819	SEZ6L	AB023144	Homo sapiens mRNA for KIAA0927 protein, partial cds. [AB023144]	6.78731e-07	8.55625
A_23_P29124	GP1BB	NM_000407	Homo sapiens glycoprotein Ib (platelet), beta polypeptide (GP1BB), mRNA [NM_000407]	7.39582e-06	8.55384
A_23_P349966	TMEM130	NM_152913	Homo sapiens transmembrane protein 130 (TMEM130), mRNA [NM_152913]	6.2264e-08	8.54705
A_23_P372974	TRAM1L1	NM_152402	Homo sapiens translocation associated membrane protein 1-like 1 (TRAM1L1), mRNA [NM_152402]	0.000904881	8.52697
A_24_P104407	DMN	NM_145728	Homo sapiens desmuslin (DMN), transcript variant A, mRNA [NM_145728]	4.40548e-08	8.52358
A_23_P163455	MAP1A	NM_002373	Homo sapiens microtubule-associated protein 1A (MAP1A), mRNA [NM_002373]	8.02729e-08	8.48606
A_32_P80455	RORB	BX647070	Homo sapiens mRNA; cDNA DKFZp686J0395 (from clone DKFZp686J0395). [BX647070]	5.42404e-08	8.48338
A_23_P90696	TRIB2	NM_021643	Homo sapiens tribbles homolog 2 (Drosophila) (TRIB2), mRNA [NM_021643]	0.000104899	8.42908
A_23_P202458	ZNF22	NM_006963	Homo sapiens zinc finger protein 22 (KOX 15) (ZNF22), mRNA [NM_006963]	4.23847e-07	8.38479
A_32_P160561	DOK6	NM_152721	Homo sapiens docking protein 6 (DOK6), mRNA [NM_152721]	3.7376e-05	8.37925
A_23_P73787	NSUN7	NM_024677	Homo sapiens NOL1/NOP2/Sun domain family, member 7 (NSUN7), mRNA [NM_024677]	3.57787e-10	8.33973
A_32_P212471	FLJ36032	AK093351	Homo sapiens cDNA FLJ36032 fis, clone TESTI2017069. [AK093351]	9.21741e-05	8.32728
A_24_P57977	SNIP	BC033233	Homo sapiens SNAP25-interacting protein, mRNA (cDNA clone IMAGE:5423326), complete cds. [BC033233]	0.00494718	8.31166
A_24_P274987	TMEFF1	NM_003692	Homo sapiens transmembrane protein with EGF-like and two follistatin-like domains 1 (TMEFF1), mRNA [NM_003692]	6.10199e-09	8.28246
A_32_P168442	FLJ41747	AK123741	Homo sapiens cDNA FLJ41747 fis, clone HSYRA2006873. [AK123741]	7.62278e-07	8.28077
A_23_P70827	KIAA1549	AL136736	Homo sapiens mRNA; cDNA DKFZp434O0710 (from clone DKFZp434O0710). [AL136736]	9.69458e-05	8.26628
A_23_P418015	MAPRE2	NM_014268	Homo sapiens microtubule-associated protein, RP/EB family, member 2 (MAPRE2), mRNA [NM_014268]	1.14482e-07	8.26447
A_23_P58169	NPY2R	NM_000910	Homo sapiens neuropeptide Y receptor Y2 (NPY2R), mRNA [NM_000910]	5.20507e-11	8.2619
A_23_P315451	KIF5A	NM_004984	Homo sapiens kinesin family member 5A (KIF5A), mRNA [NM_004984]	4.91239e-10	8.25283
A_23_P7325	BST1	NM_004334	Homo sapiens bone marrow stromal cell antigen 1 (BST1), mRNA [NM_004334]	1.26571e-08	8.23683
A_23_P144916	GFPT2	NM_005110	Homo sapiens glutamine-fructose-6-phosphate transaminase 2 (GFPT2), mRNA [NM_005110]	2.49942e-09	8.21178
A_23_P155477	C3orf18	NM_016210	Homo sapiens chromosome 3 open reading frame 18 (C3orf18), mRNA [NM_016210]	0.00323263	8.20816
A_24_P25137	CHRM3	NM_000740	Homo sapiens cholinergic receptor, muscarinic 3 (CHRM3), mRNA [NM_000740]	6.12838e-05	8.17517
A_24_P524452	HIST3H2BB	DB010344	DB010344 TCOLN2 Homo sapiens cDNA clone TCOLN2001340 5', mRNA sequence [DB010344]	0.000345528	8.16884
A_23_P416766	NOL4	NM_003787	Homo sapiens nucleolar protein 4 (NOL4), mRNA [NM_003787]	1.27916e-05	8.16548
A_24_P212539	GALM	NM_138801	Homo sapiens galactose mutarotase (aldose 1-epimerase) (GALM), mRNA [NM_138801]	3.85806e-09	8.15937
A_23_P388124	ABCD2	NM_005164	Homo sapiens ATP-binding cassette, sub-family D (ALD), member 2 (ABCD2), mRNA [NM_005164]	3.91602e-08	8.1363
A_23_P126613	AQP10	NM_080429	Homo sapiens aquaporin 10 (AQP10), mRNA [NM_080429]	5.43478e-08	8.12586
A_23_P254944	GSC	NM_173849	Homo sapiens goosecoid (GSC), mRNA [NM_173849]	2.04085e-08	8.1193
A_23_P216689	BRD3	NM_007371	Homo sapiens bromodomain containing 3 (BRD3), mRNA [NM_007371]	0.000594081	8.09713
A_23_P156310	SKP2	NM_032637	Homo sapiens S-phase kinase-associated protein 2 (p45) (SKP2), transcript variant 2, mRNA [NM_032637]	1.45652e-05	8.09498
A_24_P941831	ALS2CR4	BX538000	Homo sapiens mRNA; cDNA DKFZp313L091 (from clone DKFZp313L091). [BX538000]	5.09044e-05	8.07933
A_24_P328524	ILF3	NM_012218	Homo sapiens interleukin enhancer binding factor 3, 90kDa (ILF3), transcript variant 1, mRNA [NM_012218]	2.0376e-09	8.04121
A_23_P91697	LARGE	NM_004737	Homo sapiens like-glycosyltransferase (LARGE), transcript variant 1, mRNA [NM_004737]	9.32685e-09	8.02947
A_23_P149019	BAI2	NM_001703	Homo sapiens brain-specific angiogenesis inhibitor 2 (BAI2), mRNA [NM_001703]	0.00021646	8.02909
A_23_P8834	EPHX2	NM_001979	Homo sapiens epoxide hydrolase 2, cytoplasmic (EPHX2), mRNA [NM_001979]	0.00324396	8.0133
A_23_P89799	ACAA2	NM_006111	Homo sapiens acetyl-Coenzyme A acyltransferase 2 (mitochondrial 3-oxoacyl-Coenzyme A thiolase) (ACAA2), nuclear gene encoding mitochondrial protein, mRNA [NM_006111]	2.00621e-05	7.9829
A_24_P407224	RASSF8	AY665468	Homo sapiens clone B4-E11 carcinoma associated protein HOJ-1 mRNA, complete cds, alternatively spliced. [AY665468]	7.92341e-06	7.95981
A_23_P124742	CHKA	NM_001277	Homo sapiens choline kinase alpha (CHKA), transcript variant 1, mRNA [NM_001277]	7.7901e-08	7.95428
A_23_P8640	GPR30	NM_001505	Homo sapiens G protein-coupled receptor 30 (GPR30), transcript variant 2, mRNA [NM_001505]	0.000215821	7.94529
A_24_P360722	DIP2C	NM_014974	Homo sapiens DIP2 disco-interacting protein 2 homolog C (Drosophila) (DIP2C), mRNA [NM_014974]	7.70853e-05	7.92458
A_32_P152348	HIST1H2BD	BQ683489	AGENCOURT_8209273 NIH_MGC_112 Homo sapiens cDNA clone IMAGE:6265521 5', mRNA sequence [BQ683489]	0.00095753	7.91364
A_32_P229618	DLC1	NM_024767	Homo sapiens deleted in liver cancer 1 (DLC1), transcript variant 3, mRNA [NM_024767]	7.26861e-07	7.91115
A_23_P158885	ZNF93	AK096342	Homo sapiens cDNA FLJ39023 fis, clone NT2RP7004348, highly similar to ZINC FINGER PROTEIN 93. [AK096342]	4.28028e-07	7.9103
A_23_P167256	PHF17	AK127326	Homo sapiens cDNA FLJ45397 fis, clone BRHIP3027651, weakly similar to Bromodomain-containing protein 1. [AK127326]	4.5002e-06	7.90238
A_24_P228228	AZI1	NM_014984	Homo sapiens 5-azacytidine induced 1 (AZI1), transcript variant 1, mRNA [NM_014984]	9.04316e-07	7.89963
A_23_P86434	MGAT5B	NM_144677	Homo sapiens mannosyl (alpha-1,6-)-glycoprotein beta-1,6-N-acetyl-glucosaminyltransferase, isozyme B (MGAT5B), transcript variant 1, mRNA [NM_144677]	1.08985e-06	7.89732
A_23_P97283	PAQR6	NM_024897	Homo sapiens progestin and adipoQ receptor family member VI (PAQR6), transcript variant 1, mRNA [NM_024897]	0.000102308	7.89458
A_23_P28015	ZNF558	NM_144693	Homo sapiens zinc finger protein 558 (ZNF558), mRNA [NM_144693]	8.84866e-06	7.89377
A_23_P98844	GEFT	NM_182947	Homo sapiens RAC/CDC42 exchange factor (GEFT), transcript variant 1, mRNA [NM_182947]	0.00386804	7.877
A_23_P35684	INPP5F	NM_014937	Homo sapiens inositol polyphosphate-5-phosphatase F (INPP5F), transcript variant 1, mRNA [NM_014937]	4.892e-10	7.87292
A_23_P40548	YPEL1	NM_013313	Homo sapiens yippee-like 1 (Drosophila) (YPEL1), mRNA [NM_013313]	1.99397e-09	7.86726
A_23_P155765	HMGB2	NM_002129	Homo sapiens high-mobility group box 2 (HMGB2), mRNA [NM_002129]	8.00166e-06	7.86515
A_23_P100420	ZCCHC14	NM_015144	Homo sapiens zinc finger, CCHC domain containing 14 (ZCCHC14), mRNA [NM_015144]	8.27223e-08	7.86451
A_23_P210323	CEP68	AB011154	Homo sapiens mRNA for KIAA0582 protein, partial cds. [AB011154]	3.30285e-06	7.85941
A_23_P5845	KHK	NM_000221	Homo sapiens ketohexokinase (fructokinase) (KHK), transcript variant a, mRNA [NM_000221]	0.00039298	7.79063
A_23_P62081	SCG5	NM_003020	Homo sapiens secretogranin V (7B2 protein) (SCG5), mRNA [NM_003020]	0.000811826	7.78823
A_23_P308731	RHBDL3	NM_138328	Homo sapiens rhomboid, veinlet-like 3 (Drosophila) (RHBDL3), mRNA [NM_138328]	1.5992e-05	7.78357
A_23_P201731	TRAF5	NM_004619	Homo sapiens TNF receptor-associated factor 5 (TRAF5), transcript variant 1, mRNA [NM_004619]	0.000272511	7.77228
A_32_P200165	EGFL8	NM_030652	Homo sapiens EGF-like-domain, multiple 8 (EGFL8), mRNA [NM_030652]	1.72695e-06	7.76778
A_23_P320578	RGS16	NM_002928	Homo sapiens regulator of G-protein signalling 16 (RGS16), mRNA [NM_002928]	0.000201344	7.75938
A_23_P4649	APOC1	NM_001645	Homo sapiens apolipoprotein C-I (APOC1), mRNA [NM_001645]	3.1041e-07	7.74959
A_32_P854438	LOC390705	BC041879	Homo sapiens similar to protein phosphatase 2A 48 kDa regulatory subunit isoform 1; serine/threonine protein phosphatase 2A, 48kDa regulatory subunit; PP2A, subunit B, PR48 isoform; PP2A B subunit PR48; NY-REN-8 antigen, mRNA (cDNA clone...	3.82733e-10	7.74646
A_23_P108842	DUSP2	NM_004418	Homo sapiens dual specificity phosphatase 2 (DUSP2), mRNA [NM_004418]	3.35232e-07	7.73038
A_32_P85593	MGC14425	BC007866	Homo sapiens hypothetical protein MGC14425, mRNA (cDNA clone MGC:14425 IMAGE:4302902), complete cds. [BC007866]	1.73227e-05	7.70393
A_23_P433855	RGS4	NM_005613	Homo sapiens regulator of G-protein signalling 4 (RGS4), mRNA [NM_005613]	3.09883e-05	7.70166
A_24_P221414	DYNC1I1	NM_004411	Homo sapiens dynein, cytoplasmic 1, intermediate chain 1 (DYNC1I1), mRNA [NM_004411]	1.62735e-06	7.69475
A_23_P366559	MGC24039	NM_144973	Homo sapiens hypothetical protein MGC24039 (MGC24039), mRNA [NM_144973]	3.03048e-07	7.68335
A_24_P267293	SARM1	NM_015077	Homo sapiens sterile alpha and TIR motif containing 1 (SARM1), mRNA [NM_015077]	1.71584e-07	7.67245
A_23_P17192	RAPGEF4	NM_007023	Homo sapiens Rap guanine nucleotide exchange factor (GEF) 4 (RAPGEF4), mRNA [NM_007023]	2.53124e-11	7.62537
A_23_P324304	ALK	NM_004304	Homo sapiens anaplastic lymphoma kinase (Ki-1) (ALK), mRNA [NM_004304]	1.89636e-09	7.61947
A_23_P159927	ARHGAP4	NM_001666	Homo sapiens Rho GTPase activating protein 4 (ARHGAP4), mRNA [NM_001666]	0.0035768	7.61479
A_24_P349039	CDGAP	NM_020754	Homo sapiens Cdc42 GTPase-activating protein (CDGAP), mRNA [NM_020754]	3.43305e-10	7.5139
A_32_P140030	FOXN4	NM_213596	Homo sapiens forkhead box N4 (FOXN4), mRNA [NM_213596]	1.13432e-06	7.50857
A_23_P50426	ANKRD10	NM_017664	Homo sapiens ankyrin repeat domain 10 (ANKRD10), mRNA [NM_017664]	0.000267167	7.48466
A_24_P940680	KLRG1	NM_005810	Homo sapiens killer cell lectin-like receptor subfamily G, member 1 (KLRG1), mRNA [NM_005810]	9.21055e-11	7.45078
A_24_P64401	MGC16291	BC007394	Homo sapiens hypothetical protein MGC16291, mRNA (cDNA clone MGC:16291 IMAGE:3834089), complete cds. [BC007394]	3.65976e-06	7.42694
A_23_P122937	ELMO1	NM_014800	Homo sapiens engulfment and cell motility 1 (ELMO1), transcript variant 1, mRNA [NM_014800]	2.08057e-08	7.3385
A_23_P41789	SLC27A6	NM_001017372	Homo sapiens solute carrier family 27 (fatty acid transporter), member 6 (SLC27A6), transcript variant 2, mRNA [NM_001017372]	2.79286e-05	7.33815
A_23_P128230	NR4A1	NM_002135	Homo sapiens nuclear receptor subfamily 4, group A, member 1 (NR4A1), transcript variant 1, mRNA [NM_002135]	0.00164655	7.33761
A_23_P40415	ADAMTS5	NM_007038	Homo sapiens ADAM metallopeptidase with thrombospondin type 1 motif, 5 (aggrecanase-2) (ADAMTS5), mRNA [NM_007038]	2.52781e-09	7.32895
A_23_P332399	GTF2I	AK057670	Homo sapiens cDNA FLJ33108 fis, clone TRACH2000974, weakly similar to Transcription factor TFII-I. [AK057670]	0.00151676	7.32742
A_24_P403561	LRP4	NM_002334	Homo sapiens low density lipoprotein receptor-related protein 4 (LRP4), mRNA [NM_002334]	0.000993467	7.32048
A_23_P153651	FSD1	NM_024333	Homo sapiens fibronectin type III and SPRY domain containing 1 (FSD1), mRNA [NM_024333]	0.00240746	7.31821
A_23_P56197	CRLF1	NM_004750	Homo sapiens cytokine receptor-like factor 1 (CRLF1), mRNA [NM_004750]	0.00454935	7.31773
A_23_P161280	SPOCK2	NM_014767	Homo sapiens sparc/osteonectin, cwcv and kazal-like domains proteoglycan (testican) 2 (SPOCK2), mRNA [NM_014767]	7.71826e-08	7.3045
A_24_P37264	RNF144	NM_014746	Homo sapiens ring finger protein 144 (RNF144), mRNA [NM_014746]	2.91344e-09	7.29998
A_23_P413641	PREX1	NM_020820	Homo sapiens phosphatidylinositol 3,4,5-trisphosphate-dependent RAC exchanger 1 (PREX1), mRNA [NM_020820]	2.34799e-09	7.29737
A_23_P17345	MAFB	NM_005461	Homo sapiens v-maf musculoaponeurotic fibrosarcoma oncogene homolog B (avian) (MAFB), mRNA [NM_005461]	1.35513e-07	7.28314
A_23_P88347	PLEKHC1	NM_006832	Homo sapiens pleckstrin homology domain containing, family C (with FERM domain) member 1 (PLEKHC1), mRNA [NM_006832]	0.00016765	7.28261
A_23_P342869	FMN2	NM_020066	Homo sapiens formin 2 (FMN2), mRNA [NM_020066]	1.52037e-06	7.27125
A_23_P215883	NCALD	NM_032041	Homo sapiens neurocalcin delta (NCALD), transcript variant 8, mRNA [NM_032041]	2.02012e-10	7.25853
A_23_P57658	HRASLS	NM_020386	Homo sapiens HRAS-like suppressor (HRASLS), mRNA [NM_020386]	9.02469e-09	7.25629
A_23_P253921	ZNF167	NM_018651	Homo sapiens zinc finger protein 167 (ZNF167), transcript variant 1, mRNA [NM_018651]	1.62619e-06	7.25469
A_23_P411113	CNTNAP1	NM_003632	Homo sapiens contactin associated protein 1 (CNTNAP1), mRNA [NM_003632]	3.85378e-08	7.24304
A_23_P252163	CYTL1	NM_018659	Homo sapiens cytokine-like 1 (CYTL1), mRNA [NM_018659]	1.34352e-10	7.22374
A_23_P163787	MMP2	NM_004530	Homo sapiens matrix metallopeptidase 2 (gelatinase A, 72kDa gelatinase, 72kDa type IV collagenase) (MMP2), mRNA [NM_004530]	1.01692e-08	7.22167
A_23_P143526	S100B	NM_006272	Homo sapiens S100 calcium binding protein, beta (neural) (S100B), mRNA [NM_006272]	8.19046e-11	7.20439
A_24_P233995	MOSC1	NM_022746	Homo sapiens MOCO sulphurase C-terminal domain containing 1 (MOSC1), mRNA [NM_022746]	1.96155e-05	7.19248
A_24_P3804	C6orf26	NM_001039651	Homo sapiens chromosome 6 open reading frame 26 (C6orf26), mRNA [NM_001039651]	2.43575e-05	7.17327
A_23_P134744	RNF122	NM_024787	Homo sapiens ring finger protein 122 (RNF122), mRNA [NM_024787]	0.000883394	7.17311
A_23_P112982	SVOP	NM_018711	Homo sapiens SV2 related protein homolog (rat) (SVOP), mRNA [NM_018711]	1.32551e-09	7.15489
A_24_P284959	PCDH18	NM_019035	Homo sapiens protocadherin 18 (PCDH18), mRNA [NM_019035]	7.36932e-10	7.15415
A_23_P7301	WHSC1	NM_133334	Homo sapiens Wolf-Hirschhorn syndrome candidate 1 (WHSC1), transcript variant 7, mRNA [NM_133334]	1.86897e-07	7.14882
A_23_P204304	PTPRO	NM_030667	Homo sapiens protein tyrosine phosphatase, receptor type, O (PTPRO), transcript variant 1, mRNA [NM_030667]	2.89829e-08	7.14689
A_23_P148475	KIF4A	NM_012310	Homo sapiens kinesin family member 4A (KIF4A), mRNA [NM_012310]	0.00853274	7.12747
A_23_P344481	STOX1	NM_152709	Homo sapiens storkhead box 1 (STOX1), mRNA [NM_152709]	6.72272e-09	7.09185
A_23_P120863	GAL3ST1	NM_004861	Homo sapiens galactose-3-O-sulfotransferase 1 (GAL3ST1), mRNA [NM_004861]	0.000358318	7.07852
A_23_P17354	GDAP1L1	NM_024034	Homo sapiens ganglioside-induced differentiation-associated protein 1-like 1 (GDAP1L1), mRNA [NM_024034]	7.72282e-08	7.06398
A_24_P374634	STAU2	AK002152	Homo sapiens cDNA FLJ11290 fis, clone PLACE1009622, weakly similar to MATERNAL EFFECT PROTEIN STAUFEN. [AK002152]	2.95709e-05	7.05872
A_24_P21056	PHF14	NM_014660	Homo sapiens PHD finger protein 14 (PHF14), transcript variant 2, mRNA [NM_014660]	2.24423e-06	7.02852
A_23_P118	EXTL2	NM_001439	Homo sapiens exostoses (multiple)-like 2 (EXTL2), transcript variant 1, mRNA [NM_001439]	9.94649e-08	7.02424
A_24_P221903	C21orf30	AL117578	Homo sapiens mRNA; cDNA DKFZp434C128 (from clone DKFZp434C128). [AL117578]	4.72689e-07	7.01542
A_23_P157038	MGC40499	NM_152755	Homo sapiens PRotein Associated with Tlr4 (MGC40499), mRNA [NM_152755]	0.00119493	7.01518
A_23_P200928	NID1	NM_002508	Homo sapiens nidogen 1 (NID1), mRNA [NM_002508]	9.04637e-05	7.00868
A_23_P164047	MMD	NM_012329	Homo sapiens monocyte to macrophage differentiation-associated (MMD), mRNA [NM_012329]	0.00394049	7.00232
A_32_P200697	EPB41L5	NM_020909	Homo sapiens erythrocyte membrane protein band 4.1 like 5 (EPB41L5), mRNA [NM_020909]	8.78264e-06	6.99392
A_23_P320739	MEF2C	NM_002397	Homo sapiens MADS box transcription enhancer factor 2, polypeptide C (myocyte enhancer factor 2C) (MEF2C), mRNA [NM_002397]	2.04443e-09	6.99147
A_23_P345460	PLEKHG4	NM_015432	Homo sapiens pleckstrin homology domain containing, family G (with RhoGef domain) member 4 (PLEKHG4), mRNA [NM_015432]	5.78579e-06	6.98656
A_24_P20327	KLF12	NM_016285	Homo sapiens Kruppel-like factor 12 (KLF12), transcript variant 2, mRNA [NM_016285]	4.38152e-09	6.97166
A_23_P452	DDR2	NM_001014796	Homo sapiens discoidin domain receptor family, member 2 (DDR2), transcript variant 1, mRNA [NM_001014796]	6.3586e-08	6.96751
A_23_P2543	CUTL2	NM_015267	Homo sapiens cut-like 2 (Drosophila) (CUTL2), mRNA [NM_015267]	1.00718e-06	6.95406
A_23_P65983	CCDC102A	NM_033212	Homo sapiens coiled-coil domain containing 102A (CCDC102A), mRNA [NM_033212]	0.000579263	6.94968
A_32_P198731	DKFZP761M1511	AK096661	Homo sapiens cDNA FLJ39342 fis, clone OCBBF2018873. [AK096661]	1.67441e-06	6.9249
A_32_P196193	PAQR9	NM_198504	Homo sapiens progestin and adipoQ receptor family member IX (PAQR9), mRNA [NM_198504]	1.23284e-10	6.9244
A_23_P126266	HLX1	NM_021958	Homo sapiens H2.0-like homeobox 1 (Drosophila) (HLX1), mRNA [NM_021958]	6.2646e-13	6.89544
A_23_P116235	MDK	NM_001012334	Homo sapiens midkine (neurite growth-promoting factor 2) (MDK), transcript variant 1, mRNA [NM_001012334]	0.00218456	6.88788
A_23_P434919	RAB42	NM_152304	Homo sapiens RAB42, member RAS oncogene family (RAB42), mRNA [NM_152304]	2.37531e-08	6.88381
A_24_P228875	ARHGEF6	NM_004840	Homo sapiens Rac/Cdc42 guanine nucleotide exchange factor (GEF) 6 (ARHGEF6), mRNA [NM_004840]	2.49384e-08	6.85993
A_23_P77401	FLJ11151	NM_018340	Homo sapiens hypothetical protein FLJ11151 (FLJ11151), mRNA [NM_018340]	1.74141e-07	6.84562
A_24_P342226	ATP8B3	AK125225	Homo sapiens cDNA FLJ43235 fis, clone HCHON2004007, highly similar to Potential phospholipid-transporting ATPase IK (EC 3.6.3.13). [AK125225]	0.0001003	6.84045
A_23_P115726	SLC16A9	NM_194298	Homo sapiens solute carrier family 16 (monocarboxylic acid transporters), member 9 (SLC16A9), mRNA [NM_194298]	5.37287e-08	6.83165
A_23_P250347	CAMK4	NM_001744	Homo sapiens calcium/calmodulin-dependent protein kinase IV (CAMK4), mRNA [NM_001744]	2.09016e-10	6.82555
A_23_P40108	COL9A3	NM_001853	Homo sapiens collagen, type IX, alpha 3 (COL9A3), mRNA [NM_001853]	0.00495594	6.81353
A_23_P152047	SCAMP5	NM_138967	Homo sapiens secretory carrier membrane protein 5 (SCAMP5), mRNA [NM_138967]	0.00211714	6.79231
A_23_P119344	TEAD2	NM_003598	Homo sapiens TEA domain family member 2 (TEAD2), mRNA [NM_003598]	7.24062e-07	6.79006
A_23_P64617	FUZ	NM_025129	Homo sapiens fuzzy homolog (Drosophila) (FUZ), mRNA [NM_025129]	1.36628e-05	6.79005
A_23_P135273	DNM1	NM_001005336	Homo sapiens dynamin 1 (DNM1), transcript variant 2, mRNA [NM_001005336]	3.7035e-07	6.77762
A_23_P47924	PTPRR	NM_002849	Homo sapiens protein tyrosine phosphatase, receptor type, R (PTPRR), transcript variant 1, mRNA [NM_002849]	0.00639272	6.76377
A_23_P348524	LOC198437	NM_001007125	Homo sapiens bA299N6.3 (LOC198437), mRNA [NM_001007125]	2.9775e-07	6.72068
A_23_P212696	FSTL1	NM_007085	Homo sapiens follistatin-like 1 (FSTL1), mRNA [NM_007085]	0.000853423	6.71896
A_23_P93722	SDK1	NM_152744	Homo sapiens sidekick homolog 1 (chicken) (SDK1), mRNA [NM_152744]	3.30265e-09	6.71106
A_23_P137543	FLJ25476	NM_152493	Homo sapiens FLJ25476 protein (FLJ25476), mRNA [NM_152493]	4.34156e-05	6.71097
A_23_P5983	PLTP	NM_006227	Homo sapiens phospholipid transfer protein (PLTP), transcript variant 1, mRNA [NM_006227]	0.00149956	6.68825
A_23_P160720	SNFT	NM_018664	Homo sapiens Jun dimerization protein p21SNFT (SNFT), mRNA [NM_018664]	2.34353e-06	6.6638
A_23_P134295	NUDT1	NM_198949	Homo sapiens nudix (nucleoside diphosphate linked moiety X)-type motif 1 (NUDT1), transcript variant 2B, mRNA [NM_198949]	8.63523e-05	6.64802
A_24_P923142	ZC3HAV1L	NM_080660	Homo sapiens zinc finger CCCH-type, antiviral 1-like (ZC3HAV1L), mRNA [NM_080660]	0.00293953	6.64175
A_32_P8221	GRM8	NM_000845	Homo sapiens glutamate receptor, metabotropic 8 (GRM8), mRNA [NM_000845]	3.16056e-06	6.60487
A_23_P128698	SPRY2	NM_005842	Homo sapiens sprouty homolog 2 (Drosophila) (SPRY2), mRNA [NM_005842]	1.41529e-05	6.60467
A_23_P20443	LZTS1	NM_021020	Homo sapiens leucine zipper, putative tumor suppressor 1 (LZTS1), mRNA [NM_021020]	0.000123586	6.5982
A_23_P21376	MAGI2	NM_012301	Homo sapiens membrane associated guanylate kinase, WW and PDZ domain containing 2 (MAGI2), mRNA [NM_012301]	4.8678e-09	6.58507
A_24_P226755	TOX	NM_014729	Homo sapiens thymus high mobility group box protein TOX (TOX), mRNA [NM_014729]	0.00206304	6.58284
A_32_P334340	LOC653483	AB016898	Homo sapiens HGC6.4 mRNA, complete cds. [AB016898]	3.24485e-08	6.57725
A_23_P33791	SSBP2	NM_012446	Homo sapiens single-stranded DNA binding protein 2 (SSBP2), mRNA [NM_012446]	8.81286e-06	6.57652
A_23_P25194	HOXC8	NM_022658	Homo sapiens homeobox C8 (HOXC8), mRNA [NM_022658]	1.96488e-05	6.55584
A_23_P109072	SALL4	NM_020436	Homo sapiens sal-like 4 (Drosophila) (SALL4), mRNA [NM_020436]	2.79431e-05	6.5147
A_23_P141362	FZD2	NM_001466	Homo sapiens frizzled homolog 2 (Drosophila) (FZD2), mRNA [NM_001466]	0.00024379	6.5058
A_24_P943781	FLJ21986	NM_024913	Homo sapiens hypothetical protein FLJ21986 (FLJ21986), mRNA [NM_024913]	4.05121e-09	6.50003
A_23_P318904	SERTAD4	NM_019605	Homo sapiens SERTA domain containing 4 (SERTAD4), mRNA [NM_019605]	0.00025227	6.498
A_23_P395172	ABCC6	NM_001171	Homo sapiens ATP-binding cassette, sub-family C (CFTR/MRP), member 6 (ABCC6), mRNA [NM_001171]	0.00187618	6.49152
A_23_P82402	GLCCI1	NM_138426	Homo sapiens glucocorticoid induced transcript 1 (GLCCI1), mRNA [NM_138426]	1.28768e-05	6.4879
A_23_P48561	EFS	NM_005864	Homo sapiens embryonal Fyn-associated substrate (EFS), transcript variant 1, mRNA [NM_005864]	1.09641e-05	6.48581
A_23_P144348	SLIT2	NM_004787	Homo sapiens slit homolog 2 (Drosophila) (SLIT2), mRNA [NM_004787]	2.19776e-06	6.48236
A_23_P253661	FLJ13236	NM_024902	Homo sapiens hypothetical protein FLJ13236 (FLJ13236), mRNA [NM_024902]	1.75478e-09	6.47391
A_23_P207445	MAP2K6	NM_002758	Homo sapiens mitogen-activated protein kinase kinase 6 (MAP2K6), mRNA [NM_002758]	0.00481999	6.46245
A_24_P286935	ARL3	NM_004311	Homo sapiens ADP-ribosylation factor-like 3 (ARL3), mRNA [NM_004311]	1.12013e-06	6.44024
A_23_P156390	JAKMIP2	NM_014790	Homo sapiens janus kinase and microtubule interacting protein 2 (JAKMIP2), mRNA [NM_014790]	0.00242801	6.4386
A_23_P502047	CHRD	NM_003741	Homo sapiens chordin (CHRD), mRNA [NM_003741]	5.10179e-05	6.42846
A_32_P80413	PAP2D	NM_001010861	Homo sapiens phosphatidic acid phosphatase type 2 (PAP2D), transcript variant 2, mRNA [NM_001010861]	3.61163e-08	6.4034
A_32_P125338	FAM102B	NM_001010883	Homo sapiens family with sequence similarity 102, member B (FAM102B), mRNA [NM_001010883]	3.34618e-08	6.39394
A_23_P129005	KIAA1305	BC008219	Homo sapiens KIAA1305, mRNA (cDNA clone IMAGE:3865984), complete cds. [BC008219]	0.000319907	6.37083
A_24_P925062	MTMR4	NM_004687	Homo sapiens myotubularin related protein 4 (MTMR4), mRNA [NM_004687]	6.45311e-09	6.36815
A_23_P88404	TGFB3	NM_003239	Homo sapiens transforming growth factor, beta 3 (TGFB3), mRNA [NM_003239]	4.9482e-06	6.36309
A_23_P205273	PPP1R13B	NM_015316	Homo sapiens protein phosphatase 1, regulatory (inhibitor) subunit 13B (PPP1R13B), mRNA [NM_015316]	4.18949e-08	6.35192
A_24_P418816	GPX7	NM_015696	Homo sapiens glutathione peroxidase 7 (GPX7), mRNA [NM_015696]	5.78416e-05	6.34177
A_24_P148907	MAB21L2	NM_006439	Homo sapiens mab-21-like 2 (C. elegans) (MAB21L2), mRNA [NM_006439]	8.7782e-07	6.339
A_32_P224047	ATP8B2	NM_001005855	Homo sapiens ATPase, Class I, type 8B, member 2 (ATP8B2), transcript variant 2, mRNA [NM_001005855]	3.38415e-10	6.32945
A_23_P70818	SMO	NM_005631	Homo sapiens smoothened homolog (Drosophila) (SMO), mRNA [NM_005631]	0.00529877	6.31104
A_23_P363344	TPM1	NM_001018004	Homo sapiens tropomyosin 1 (alpha) (TPM1), transcript variant 3, mRNA [NM_001018004]	2.00963e-07	6.3065
A_24_P96780	CENPF	NM_016343	Homo sapiens centromere protein F, 350/400ka (mitosin) (CENPF), mRNA [NM_016343]	0.00843155	6.29053
A_23_P335695	OBSL1	AK023854	Homo sapiens cDNA FLJ13792 fis, clone THYRO1000072, weakly similar to MYOSIN LIGHT CHAIN KINASE, SMOOTH MUSCLE AND NON-MUSCLE ISOZYMES (EC 2.7.1.117). [AK023854]	0.00225206	6.28494
A_23_P111037	HIST1H3A	NM_003529	Homo sapiens histone 1, H3a (HIST1H3A), mRNA [NM_003529]	2.16978e-06	6.25636
A_32_P176594	KIAA1614	AB046834	Homo sapiens mRNA for KIAA1614 protein, partial cds. [AB046834]	1.47854e-08	6.24388
A_23_P10025	NELL2	NM_006159	Homo sapiens NEL-like 2 (chicken) (NELL2), mRNA [NM_006159]	1.32835e-10	6.23961
A_23_P89871	ZNF415	NM_018355	Homo sapiens zinc finger protein 415 (ZNF415), mRNA [NM_018355]	1.94372e-05	6.22025
A_23_P64058	RASGRP2	NM_005825	Homo sapiens RAS guanyl releasing protein 2 (calcium and DAG-regulated) (RASGRP2), transcript variant 1, mRNA [NM_005825]	8.02843e-08	6.20613
A_24_P237878	LOC348262	NM_207368	Homo sapiens hypothetical protein LOC348262 (LOC348262), mRNA [NM_207368]	8.15493e-07	6.17943
A_24_P941773	METTL7A	NM_014033	Homo sapiens methyltransferase like 7A (METTL7A), mRNA [NM_014033]	0.0030888	6.17122
A_23_P94546	GKAP1	NM_025211	Homo sapiens G kinase anchoring protein 1 (GKAP1), mRNA [NM_025211]	2.8518e-05	6.16221
A_23_P368225	EME1	NM_152463	Homo sapiens essential meiotic endonuclease 1 homolog 1 (S. pombe) (EME1), mRNA [NM_152463]	0.00529834	6.15742
A_24_P399694	ZCCHC3	NM_033089	Homo sapiens zinc finger, CCHC domain containing 3 (ZCCHC3), mRNA [NM_033089]	3.92699e-07	6.15472
A_23_P132138	C1orf71	NM_152609	Homo sapiens chromosome 1 open reading frame 71 (C1orf71), mRNA [NM_152609]	0.000153645	6.15383
A_24_P69379	CASD1	NM_022900	Homo sapiens CAS1 domain containing 1 (CASD1), mRNA [NM_022900]	4.89839e-09	6.14255
A_23_P159741	BCL2	M13995	Human B-cell leukemia/lymphoma 2 (bcl-2) proto-oncogene mRNA encoding bcl-2-beta protein, complete cds. [M13995]	6.90007e-06	6.14184
A_24_P204690	PRAMEF3	NM_001013692	Homo sapiens PRAME family member 3 (PRAMEF3), mRNA [NM_001013692]	5.58014e-10	6.13119
A_23_P35114	PLEKHO1	NM_016274	Homo sapiens pleckstrin homology domain containing, family O member 1 (PLEKHO1), mRNA [NM_016274]	0.00966552	6.12191
A_23_P77304	AP3B2	NM_004644	Homo sapiens adaptor-related protein complex 3, beta 2 subunit (AP3B2), mRNA [NM_004644]	7.69557e-09	6.11198
A_23_P80817	TAGLN3	NM_013259	Homo sapiens transgelin 3 (TAGLN3), transcript variant 1, mRNA [NM_013259]	0.00101375	6.10848
A_24_P185186	SAMD14	NM_174920	Homo sapiens sterile alpha motif domain containing 14 (SAMD14), mRNA [NM_174920]	1.45664e-05	6.07965
A_23_P408376	HSPA12A	AB007877	Homo sapiens KIAA0417 mRNA, complete cds. [AB007877]	2.68571e-07	6.07558
A_23_P5281	LRRC4C	NM_020929	Homo sapiens leucine rich repeat containing 4C (LRRC4C), mRNA [NM_020929]	7.8828e-06	6.06355
A_23_P131383	FANCL	NM_018062	Homo sapiens Fanconi anemia, complementation group L (FANCL), mRNA [NM_018062]	0.00463926	6.06222
A_24_P198178	CALCB	NM_000728	Homo sapiens calcitonin-related polypeptide, beta (CALCB), mRNA [NM_000728]	0.000152946	6.06113
A_23_P164706	ZNF177	NM_003451	Homo sapiens zinc finger protein 177 (ZNF177), mRNA [NM_003451]	5.97815e-05	6.06075
A_23_P251412	SCGN	NM_006998	Homo sapiens secretagogin, EF-hand calcium binding protein (SCGN), mRNA [NM_006998]	8.40328e-09	6.06006
A_24_P91094	RPIP8	NM_006695	Homo sapiens RaP2 interacting protein 8 (RPIP8), mRNA [NM_006695]	7.59868e-05	6.05702
A_23_P70445	HIST1H3E	NM_003532	Homo sapiens histone 1, H3e (HIST1H3E), mRNA [NM_003532]	1.01318e-05	6.05666
A_24_P196528	CRABP1	AK096006	Homo sapiens cDNA FLJ38687 fis, clone KIDNE2001117. [AK096006]	4.81408e-09	6.05091
A_23_P158318	ROR2	NM_004560	Homo sapiens receptor tyrosine kinase-like orphan receptor 2 (ROR2), mRNA [NM_004560]	0.00237172	6.05077
A_32_P185229	ATP5J	NM_001003703	Homo sapiens ATP synthase, H+ transporting, mitochondrial F0 complex, subunit F6 (ATP5J), nuclear gene encoding mitochondrial protein, transcript variant 1, mRNA [NM_001003703]	0.00100843	6.05072
A_23_P147786	RIMS2	NM_014677	Homo sapiens regulating synaptic membrane exocytosis 2 (RIMS2), mRNA [NM_014677]	2.7969e-07	6.04852
A_23_P325642	PDIA2	NM_006849	Homo sapiens protein disulfide isomerase family A, member 2 (PDIA2), mRNA [NM_006849]	1.16272e-08	6.04114
A_23_P39799	LOXL3	NM_032603	Homo sapiens lysyl oxidase-like 3 (LOXL3), mRNA [NM_032603]	1.2831e-06	6.0269
A_23_P150325	TMEM133	NM_032021	Homo sapiens transmembrane protein 133 (TMEM133), mRNA [NM_032021]	2.74339e-07	6.02644
A_32_P87568	ELN	NM_000501	Homo sapiens elastin (supravalvular aortic stenosis, Williams-Beuren syndrome) (ELN), mRNA [NM_000501]	1.12915e-08	6.02256
A_23_P400217	MUM1	NM_032853	Homo sapiens melanoma associated antigen (mutated) 1 (MUM1), mRNA [NM_032853]	2.45236e-07	6.01194
A_23_P45059	DOCK1	NM_001380	Homo sapiens dedicator of cytokinesis 1 (DOCK1), mRNA [NM_001380]	4.00142e-06	6.01186
A_24_P231104	LAYN	AK096925	Homo sapiens cDNA FLJ39606 fis, clone SKNSH2006234. [AK096925]	9.52115e-05	5.99945
A_23_P130149	ENO3	NM_001976	Homo sapiens enolase 3 (beta, muscle) (ENO3), transcript variant 1, mRNA [NM_001976]	0.000162431	5.99442
A_23_P358628	DPY19L1	DQ287932	Homo sapiens DPY-19-like protein 1 (DPY19L1) mRNA, complete cds. [DQ287932]	0.00059848	5.95497
A_24_P98371	PSIP1	NM_033222	Homo sapiens PC4 and SFRS1 interacting protein 1 (PSIP1), transcript variant 2, mRNA [NM_033222]	9.95478e-06	5.94718
A_23_P390384	ZNF630	NM_001037735	Homo sapiens zinc finger protein 630 (ZNF630), mRNA [NM_001037735]	8.55978e-08	5.90426
A_32_P32061	C2orf27	NM_013310	Homo sapiens chromosome 2 open reading frame 27 (C2orf27), mRNA [NM_013310]	4.99948e-10	5.90151
A_23_P434430	ZNF439	NM_152262	Homo sapiens zinc finger protein 439 (ZNF439), mRNA [NM_152262]	5.9192e-09	5.89735
A_24_P38347	DPYSL2	NM_001386	Homo sapiens dihydropyrimidinase-like 2 (DPYSL2), mRNA [NM_001386]	6.57786e-05	5.89533
A_23_P344281	ZIK1	NM_001010879	Homo sapiens zinc finger protein interacting with K protein 1 (ZIK1), mRNA [NM_001010879]	2.2558e-07	5.89468
A_23_P252193	ITGA9	NM_002207	Homo sapiens integrin, alpha 9 (ITGA9), mRNA [NM_002207]	1.59956e-11	5.88849
A_32_P20288	FBXL17	BC063316	Homo sapiens F-box and leucine-rich repeat protein 17, mRNA (cDNA clone MGC:71854 IMAGE:30341140), complete cds. [BC063316]	0.00127215	5.86928
A_23_P167159	SCRG1	NM_007281	Homo sapiens scrapie responsive protein 1 (SCRG1), mRNA [NM_007281]	2.77571e-08	5.86832
A_24_P911179	ASB13	NM_024701	Homo sapiens ankyrin repeat and SOCS box-containing 13 (ASB13), mRNA [NM_024701]	0.00786824	5.86316
A_23_P115261	AGT	NM_000029	Homo sapiens angiotensinogen (serpin peptidase inhibitor, clade A, member 8) (AGT), mRNA [NM_000029]	2.87714e-11	5.85869
A_23_P342709	FBXO15	NM_152676	Homo sapiens F-box protein 15 (FBXO15), mRNA [NM_152676]	1.47476e-07	5.83588
A_24_P265088	PDZD4	NM_032512	Homo sapiens PDZ domain containing 4 (PDZD4), mRNA [NM_032512]	6.48538e-09	5.83439
A_23_P163567	SMPD3	NM_018667	Homo sapiens sphingomyelin phosphodiesterase 3, neutral membrane (neutral sphingomyelinase II) (SMPD3), mRNA [NM_018667]	8.21902e-08	5.83041
A_23_P3963	CDR2L	NM_014603	Homo sapiens cerebellar degeneration-related protein 2-like (CDR2L), mRNA [NM_014603]	5.74237e-08	5.83026
A_23_P25069	OVOS2	BC039117	Homo sapiens ovostatin 2, mRNA (cDNA clone IMAGE:4827636). [BC039117]	7.4821e-07	5.82868
A_24_P330385	SLC22A17	NM_016609	Homo sapiens solute carrier family 22 (organic cation transporter), member 17 (SLC22A17), transcript variant 2, mRNA [NM_016609]	1.6787e-05	5.82702
A_23_P88691	CHRNA5	NM_000745	Homo sapiens cholinergic receptor, nicotinic, alpha 5 (CHRNA5), mRNA [NM_000745]	0.00132531	5.81392
A_23_P99285	GPR19	NM_006143	Homo sapiens G protein-coupled receptor 19 (GPR19), mRNA [NM_006143]	5.76588e-05	5.81167
A_24_P333857	SGIP1	NM_032291	Homo sapiens SH3-domain GRB2-like (endophilin) interacting protein 1 (SGIP1), mRNA [NM_032291]	1.07972e-09	5.79315
A_24_P186274	IGFBP5	NM_000599	Homo sapiens insulin-like growth factor binding protein 5 (IGFBP5), mRNA [NM_000599]	4.02306e-09	5.7852
A_23_P375165	FLJ35767	NM_207459	Homo sapiens FLJ35767 protein (FLJ35767), mRNA [NM_207459]	8.79168e-09	5.78374
A_23_P55917	SYT3	NM_032298	Homo sapiens synaptotagmin III (SYT3), mRNA [NM_032298]	1.27698e-09	5.77595
A_23_P215454	ELAVL1	NM_001419	Homo sapiens ELAV (embryonic lethal, abnormal vision, Drosophila)-like 1 (Hu antigen R) (ELAVL1), mRNA [NM_001419]	2.53642e-10	5.75584
A_24_P911420	NUDT21	NM_007006	Homo sapiens nudix (nucleoside diphosphate linked moiety X)-type motif 21 (NUDT21), mRNA [NM_007006]	9.72646e-05	5.74783
A_23_P112241	DNAJB5	NM_012266	Homo sapiens DnaJ (Hsp40) homolog, subfamily B, member 5 (DNAJB5), mRNA [NM_012266]	0.00532899	5.73526
A_23_P143374	RP4-691N24.1	NM_025176	Homo sapiens KIAA0980 protein (KIAA0980), mRNA [NM_025176]	3.95008e-06	5.73435
A_23_P130974	KIAA1683	NM_025249	Homo sapiens KIAA1683 (KIAA1683), mRNA [NM_025249]	7.00901e-08	5.72881
A_23_P65230	TMTC4	NM_032813	Homo sapiens transmembrane and tetratricopeptide repeat containing 4 (TMTC4), mRNA [NM_032813]	0.0003803	5.72398
A_24_P926960	MCF2L	AF086413	Homo sapiens full length insert cDNA clone ZD77E02. [AF086413]	6.92221e-07	5.71483
A_32_P210168	LOC388135	NM_001039614	Homo sapiens similar to RIKEN cDNA 6030419C18 gene (LOC388135), mRNA [NM_001039614]	1.80109e-07	5.7126
A_24_P876408	MGC3032	AK096306	Homo sapiens cDNA FLJ38987 fis, clone NT2RI2005818. [AK096306]	6.55089e-05	5.71138
A_23_P319423	KCNK5	NM_003740	Homo sapiens potassium channel, subfamily K, member 5 (KCNK5), mRNA [NM_003740]	0.000378069	5.71115
A_23_P84320	HMX1	NM_018942	Homo sapiens homeobox (H6 family) 1 (HMX1), mRNA [NM_018942]	1.87333e-09	5.70809
A_32_P525524	KIAA1754L	NM_178495	Homo sapiens KIAA1754-like (KIAA1754L), transcript variant 1, mRNA [NM_178495]	7.66364e-07	5.69432
A_24_P579356	ARHGAP28	NM_001010000	Homo sapiens Rho GTPase activating protein 28 (ARHGAP28), transcript variant 1, mRNA [NM_001010000]	2.92049e-05	5.69048
A_23_P126291	SNRPE	NM_003094	Homo sapiens small nuclear ribonucleoprotein polypeptide E (SNRPE), mRNA [NM_003094]	0.000201531	5.68574
A_23_P72912	SLC4A8	NM_004858	Homo sapiens solute carrier family 4, sodium bicarbonate cotransporter, member 8 (SLC4A8), transcript variant 2, mRNA [NM_004858]	5.27011e-06	5.66949
A_23_P107401	TIMP2	AK057217	Homo sapiens cDNA FLJ32655 fis, clone TESTI1000025, weakly similar to M.musculus mRNA for testis-specific protein, DDC8. [AK057217]	0.000491404	5.66302
A_24_P66592	CNKSR3	NM_173515	Homo sapiens CNKSR family member 3 (CNKSR3), mRNA [NM_173515]	5.64093e-07	5.64654
A_23_P69537	NMU	NM_006681	Homo sapiens neuromedin U (NMU), mRNA [NM_006681]	0.0031426	5.62129
A_23_P129133	OCA2	NM_000275	Homo sapiens oculocutaneous albinism II (pink-eye dilution homolog, mouse) (OCA2), mRNA [NM_000275]	8.0322e-07	5.6162
A_23_P29096	PDE9A	NM_002606	Homo sapiens phosphodiesterase 9A (PDE9A), transcript variant 1, mRNA [NM_002606]	0.00630817	5.60475
A_23_P102471	MSH2	NM_000251	Homo sapiens mutS homolog 2, colon cancer, nonpolyposis type 1 (E. coli) (MSH2), mRNA [NM_000251]	0.00409952	5.59937
A_24_P265506	NTRK1	NM_002529	Homo sapiens neurotrophic tyrosine kinase, receptor, type 1 (NTRK1), transcript variant 2, mRNA [NM_002529]	0.00286285	5.59173
A_23_P379649	BMF	NM_001003940	Homo sapiens Bcl2 modifying factor (BMF), transcript variant 1, mRNA [NM_001003940]	0.0011911	5.59159
A_23_P31765	PKIA	NM_006823	Homo sapiens protein kinase (cAMP-dependent, catalytic) inhibitor alpha (PKIA), transcript variant 6, mRNA [NM_006823]	0.00110599	5.58708
A_23_P142878	ATOH8	NM_032827	Homo sapiens atonal homolog 8 (Drosophila) (ATOH8), mRNA [NM_032827]	0.000142196	5.57869
A_23_P47148	NOX4	NM_016931	Homo sapiens NADPH oxidase 4 (NOX4), mRNA [NM_016931]	1.6025e-06	5.57082
A_23_P436369	FBLN1	NM_006485	Homo sapiens fibulin 1 (FBLN1), transcript variant B, mRNA [NM_006485]	5.68149e-08	5.5629
A_23_P203439	KCNC1	NM_004976	Homo sapiens potassium voltage-gated channel, Shaw-related subfamily, member 1 (KCNC1), mRNA [NM_004976]	8.07089e-07	5.54446
A_23_P85008	MAOB	NM_000898	Homo sapiens monoamine oxidase B (MAOB), nuclear gene encoding mitochondrial protein, mRNA [NM_000898]	1.952e-08	5.53589
A_23_P396328	MPDZ	AB210041	Homo sapiens mRNA for MPDZ variant protein, partial cds, clone: pf00482. [AB210041]	0.00115392	5.52647
A_24_P95723	KIAA0125	NM_014792	Homo sapiens KIAA0125 (KIAA0125), mRNA [NM_014792]	2.89331e-06	5.52636
A_23_P17242	ABHD1	NM_032604	Homo sapiens abhydrolase domain containing 1 (ABHD1), mRNA [NM_032604]	1.65475e-09	5.52444
A_23_P331700	FLJ37078	NM_001039212	Homo sapiens hypothetical protein FLJ37078 (FLJ37078), mRNA [NM_001039212]	0.00150199	5.49582
A_23_P3302	MNS1	NM_018365	Homo sapiens meiosis-specific nuclear structural 1 (MNS1), mRNA [NM_018365]	0.00200864	5.49084
A_23_P368484	C17orf76	NM_207387	Homo sapiens chromosome 17 open reading frame 76 (C17orf76), mRNA [NM_207387]	7.23911e-07	5.48831
A_23_P209449	FZD7	NM_003507	Homo sapiens frizzled homolog 7 (Drosophila) (FZD7), mRNA [NM_003507]	0.000142783	5.47636
A_23_P202392	SUV39H2	NM_024670	Homo sapiens suppressor of variegation 3-9 homolog 2 (Drosophila) (SUV39H2), mRNA [NM_024670]	0.00122707	5.46616
A_24_P62505	GLT25D2	NM_015101	Homo sapiens glycosyltransferase 25 domain containing 2 (GLT25D2), mRNA [NM_015101]	3.46436e-10	5.44856
A_24_P944588	ZNF682	NM_033196	Homo sapiens zinc finger protein 682 (ZNF682), mRNA [NM_033196]	3.67799e-08	5.44709
A_23_P7752	SEMA6A	NM_020796	Homo sapiens sema domain, transmembrane domain (TM), and cytoplasmic domain, (semaphorin) 6A (SEMA6A), mRNA [NM_020796]	5.10659e-07	5.43885
A_24_P254705	ZNF695	NM_020394	Homo sapiens zinc finger protein 695 (ZNF695), mRNA [NM_020394]	1.54099e-06	5.43095
A_23_P121374	SEMA5B	NM_001031702	Homo sapiens sema domain, seven thrombospondin repeats (type 1 and type 1-like), transmembrane domain (TM) and short cytoplasmic domain, (semaphorin) 5B (SEMA5B), transcript variant 1, mRNA [NM_001031702]	0.00761619	5.42996
A_24_P623734	LOC257407	AF007149	Homo sapiens clone 23568, 23621, 23795, 23873 and 23874 mRNA sequences. [AF007149]	1.95667e-05	5.40287
A_23_P47728	MAP6	NM_033063	Homo sapiens microtubule-associated protein 6 (MAP6), transcript variant 1, mRNA [NM_033063]	3.09592e-12	5.3901
A_24_P933418	ABI2	NM_005759	Homo sapiens abl interactor 2 (ABI2), mRNA [NM_005759]	2.01888e-05	5.37473
A_23_P89746	RAX	NM_013435	Homo sapiens retina and anterior neural fold homeobox (RAX), mRNA [NM_013435]	2.00978e-08	5.36907
A_23_P128613	KDELC1	NM_024089	Homo sapiens KDEL (Lys-Asp-Glu-Leu) containing 1 (KDELC1), mRNA [NM_024089]	2.57061e-05	5.35775
A_23_P384056	CCDC14	NM_022757	Homo sapiens coiled-coil domain containing 14 (CCDC14), mRNA [NM_022757]	0.000219912	5.3538
A_24_P192994	FADS1	NM_013402	Homo sapiens fatty acid desaturase 1 (FADS1), mRNA [NM_013402]	0.00350094	5.35226
A_23_P161481	KIAA1274	NM_014431	Homo sapiens KIAA1274 (KIAA1274), mRNA [NM_014431]	1.77459e-08	5.35089
A_23_P205355	SERPINA5	NM_000624	Homo sapiens serpin peptidase inhibitor, clade A (alpha-1 antiproteinase, antitrypsin), member 5 (SERPINA5), mRNA [NM_000624]	3.33847e-06	5.3405
A_23_P45955	TEKT2	NM_014466	Homo sapiens tektin 2 (testicular) (TEKT2), mRNA [NM_014466]	8.92866e-08	5.33197
A_23_P30634	BACH2	NM_021813	Homo sapiens BTB and CNC homology 1, basic leucine zipper transcription factor 2 (BACH2), mRNA [NM_021813]	3.88184e-08	5.32627
A_23_P61466	CD163L1	NM_174941	Homo sapiens CD163 molecule-like 1 (CD163L1), mRNA [NM_174941]	6.73457e-08	5.31483
A_24_P306945	LOC441245	AK090474	Homo sapiens mRNA for FLJ00396 protein. [AK090474]	6.30757e-08	5.3104
A_23_P19134	GNAS	NM_080425	Homo sapiens GNAS complex locus (GNAS), transcript variant 3, mRNA [NM_080425]	4.46382e-08	5.30921
A_23_P96590	GPRASP1	NM_014710	Homo sapiens G protein-coupled receptor associated sorting protein 1 (GPRASP1), mRNA [NM_014710]	4.44279e-07	5.30063
A_32_P202502	EFHA2	NM_181723	Homo sapiens EF-hand domain family, member A2 (EFHA2), mRNA [NM_181723]	1.4603e-05	5.29507
A_23_P337778	TDH	NR_001578	Homo sapiens L-threonine dehydrogenase (TDH) on chromosome 8 [NR_001578]	6.85238e-09	5.29414
A_24_P40626	GREM2	NM_022469	Homo sapiens gremlin 2, cysteine knot superfamily, homolog (Xenopus laevis) (GREM2), mRNA [NM_022469]	0.00529425	5.29303
A_23_P342131	CYBASC3	NM_153611	Homo sapiens cytochrome b, ascorbate dependent 3 (CYBASC3), mRNA [NM_153611]	0.000259382	5.28908
A_23_P144521	ADAMTS3	NM_014243	Homo sapiens ADAM metallopeptidase with thrombospondin type 1 motif, 3 (ADAMTS3), mRNA [NM_014243]	0.0032396	5.28116
A_24_P121891	FRMD4A	AK057828	Homo sapiens cDNA FLJ25099 fis, clone CBR01272. [AK057828]	1.62287e-06	5.27403
A_24_P280029	PDXP	NM_020315	Homo sapiens pyridoxal (pyridoxine, vitamin B6) phosphatase (PDXP), mRNA [NM_020315]	0.000116141	5.27171
A_23_P3592	HSF4	NM_001538	Homo sapiens heat shock transcription factor 4 (HSF4), transcript variant 1, mRNA [NM_001538]	4.09985e-09	5.268
A_32_P138032	C1orf61	NM_006365	Homo sapiens chromosome 1 open reading frame 61 (C1orf61), mRNA [NM_006365]	3.44352e-09	5.25229
A_24_P62237	CERK	NM_022766	Homo sapiens ceramide kinase (CERK), transcript variant 1, mRNA [NM_022766]	7.53532e-06	5.24002
A_24_P287392	GPR162	NM_019858	Homo sapiens G protein-coupled receptor 162 (GPR162), transcript variant A-2, mRNA [NM_019858]	8.33884e-08	5.23775
A_24_P940999	FLJ39609	AK096928	Homo sapiens cDNA FLJ39609 fis, clone SKNSH2008043. [AK096928]	6.19304e-08	5.22985
A_23_P140427	EVL	NM_016337	Homo sapiens Enah/Vasp-like (EVL), mRNA [NM_016337]	1.96141e-05	5.22087
A_23_P53247	DLG2	NM_001364	Homo sapiens discs, large homolog 2, chapsyn-110 (Drosophila) (DLG2), mRNA [NM_001364]	4.34565e-05	5.2154
A_23_P40989	USP13	NM_003940	Homo sapiens ubiquitin specific peptidase 13 (isopeptidase T-3) (USP13), mRNA [NM_003940]	0.000249622	5.2151
A_23_P143127	EML4	NM_019063	Homo sapiens echinoderm microtubule associated protein like 4 (EML4), mRNA [NM_019063]	5.24892e-07	5.21298
A_23_P73763	LAGE3	NM_006014	Homo sapiens L antigen family, member 3 (LAGE3), mRNA [NM_006014]	0.00229022	5.21101
A_23_P75056	GATA3	NM_001002295	Homo sapiens GATA binding protein 3 (GATA3), transcript variant 1, mRNA [NM_001002295]	5.93528e-06	5.21067
A_23_P5370	RPRM	NM_019845	Homo sapiens reprimo, TP53 dependent G2 arrest mediator candidate (RPRM), mRNA [NM_019845]	1.8842e-09	5.20413
A_23_P90357	TBXA2R	NM_201636	Homo sapiens thromboxane A2 receptor (TBXA2R), transcript variant 1, mRNA [NM_201636]	7.61301e-08	5.19819
A_23_P209735	ARMC9	NM_025139	Homo sapiens armadillo repeat containing 9 (ARMC9), mRNA [NM_025139]	7.3823e-06	5.19136
A_23_P67453	TNNI3	NM_000363	Homo sapiens troponin I type 3 (cardiac) (TNNI3), mRNA [NM_000363]	0.00317463	5.18979
A_23_P146339	GPT	NM_005309	Homo sapiens glutamic-pyruvate transaminase (alanine aminotransferase) (GPT), mRNA [NM_005309]	5.60155e-09	5.18932
A_23_P90359	NRTN	NM_004558	Homo sapiens neurturin (NRTN), mRNA [NM_004558]	7.92026e-07	5.18692
A_24_P51909	CPLX1	NM_006651	Homo sapiens complexin 1 (CPLX1), mRNA [NM_006651]	1.66369e-07	5.18555
A_24_P359942	RBMS3	NM_014483	Homo sapiens RNA binding motif, single stranded interacting protein (RBMS3), transcript variant 2, mRNA [NM_014483]	5.19887e-10	5.18429
A_23_P314642	SUHW3	NM_017666	Homo sapiens suppressor of hairy wing homolog 3 (Drosophila) (SUHW3), mRNA [NM_017666]	1.50441e-08	5.17571
A_23_P204885	PCDH20	NM_022843	Homo sapiens protocadherin 20 (PCDH20), mRNA [NM_022843]	2.22757e-09	5.16803
A_23_P209856	ADAMTS4	BC030812	Homo sapiens ADAM metallopeptidase with thrombospondin type 1 motif, 4, mRNA (cDNA clone IMAGE:4693587), complete cds. [BC030812]	2.55198e-10	5.16546
A_23_P329261	KCNJ2	NM_000891	Homo sapiens potassium inwardly-rectifying channel, subfamily J, member 2 (KCNJ2), mRNA [NM_000891]	1.10141e-10	5.16361
A_24_P158314	GAB2	NM_012296	Homo sapiens GRB2-associated binding protein 2 (GAB2), transcript variant 2, mRNA [NM_012296]	0.00033213	5.15494
A_23_P123086	KIAA0495	NM_207306	Homo sapiens KIAA0495 (KIAA0495), mRNA [NM_207306]	4.41598e-05	5.15254
A_24_P450092	LOC254057	AK024653	Homo sapiens cDNA: FLJ21000 fis, clone CAE03359. [AK024653]	6.92554e-10	5.14389
A_23_P34800	MYOZ3	NM_133371	Homo sapiens myozenin 3 (MYOZ3), mRNA [NM_133371]	0.00464909	5.14361
A_24_P332739	GUSBL2	NM_206908	Homo sapiens glucuronidase, beta-like 2 (GUSBL2), transcript variant 2, mRNA [NM_206908]	0.000895795	5.11807
A_32_P92654	SMA5	NM_021036	Homo sapiens SMA5 (SMA5), mRNA [NM_021036]	0.000545746	5.11184
A_23_P7582	TCF7	NM_003202	Homo sapiens transcription factor 7 (T-cell specific, HMG-box) (TCF7), transcript variant 1, mRNA [NM_003202]	0.000285567	5.1077
A_24_P418408	FAM89A	NM_198552	Homo sapiens family with sequence similarity 89, member A (FAM89A), mRNA [NM_198552]	0.000680367	5.10653
A_23_P127964	PRCP	NM_199418	Homo sapiens prolylcarboxypeptidase (angiotensinase C) (PRCP), transcript variant 2, mRNA [NM_199418]	0.000194322	5.10413
A_23_P136355	HHAT	NM_018194	Homo sapiens hedgehog acyltransferase (HHAT), mRNA [NM_018194]	0.000317933	5.0997
A_23_P377197	MRAS	NM_012219	Homo sapiens muscle RAS oncogene homolog (MRAS), mRNA [NM_012219]	9.61728e-05	5.0875
A_24_P380284	PCDHB9	NM_019119	Homo sapiens protocadherin beta 9 (PCDHB9), mRNA [NM_019119]	5.50054e-08	5.08496
A_23_P132365	LDOC1L	NM_032287	Homo sapiens leucine zipper, down-regulated in cancer 1-like (LDOC1L), mRNA [NM_032287]	2.71147e-06	5.07908
A_24_P246361	IQGAP2	NM_006633	Homo sapiens IQ motif containing GTPase activating protein 2 (IQGAP2), mRNA [NM_006633]	7.08722e-11	5.07482
A_24_P57047	DLL3	NM_203486	Homo sapiens delta-like 3 (Drosophila) (DLL3), transcript variant 2, mRNA [NM_203486]	3.99921e-06	5.07225
A_23_P55936	FCGRT	NM_004107	Homo sapiens Fc fragment of IgG, receptor, transporter, alpha (FCGRT), mRNA [NM_004107]	0.00134661	5.05612
A_32_P68533	FLJ11710	AK021772	Homo sapiens cDNA FLJ11710 fis, clone HEMBA1005149. [AK021772]	0.000404774	5.04679
A_23_P128663	SACS	NM_014363	Homo sapiens spastic ataxia of Charlevoix-Saguenay (sacsin) (SACS), mRNA [NM_014363]	0.00147507	5.03223
A_23_P32021	FANCC	NM_000136	Homo sapiens Fanconi anemia, complementation group C (FANCC), mRNA [NM_000136]	0.000399843	4.99276
A_23_P12363	ROR1	BC080541	Homo sapiens receptor tyrosine kinase-like orphan receptor 1, mRNA (cDNA clone IMAGE:5477978), complete cds. [BC080541]	8.15244e-06	4.98436
A_23_P81262	PCDHB4	NM_018938	Homo sapiens protocadherin beta 4 (PCDHB4), mRNA [NM_018938]	2.02883e-09	4.95958
A_23_P155835	CYB561	NM_001017916	Homo sapiens cytochrome b-561 (CYB561), transcript variant 2, mRNA [NM_001017916]	3.52256e-06	4.94948
A_23_P398836	KIAA1344	NM_020784	Homo sapiens KIAA1344 (KIAA1344), mRNA [NM_020784]	0.000693082	4.93917
A_23_P307544	PLXNA2	AK055196	Homo sapiens cDNA FLJ30634 fis, clone CTONG2002453. [AK055196]	3.46368e-05	4.93668
A_24_P393470	MEF2B	BC004449	Homo sapiens MADS box transcription enhancer factor 2, polypeptide B (myocyte enhancer factor 2B), mRNA (cDNA clone IMAGE:2819918), complete cds. [BC004449]	3.47242e-05	4.92387
A_23_P144684	ANKRD32	NM_032290	Homo sapiens ankyrin repeat domain 32 (ANKRD32), mRNA [NM_032290]	0.00599443	4.91987
A_23_P52806	BACE1	NM_012104	Homo sapiens beta-site APP-cleaving enzyme 1 (BACE1), transcript variant a, mRNA [NM_012104]	2.53788e-05	4.91692
A_23_P402610	PFAS	NM_012393	Homo sapiens phosphoribosylformylglycinamidine synthase (FGAR amidotransferase) (PFAS), mRNA [NM_012393]	1.12822e-05	4.91626
A_23_P125233	CNN1	NM_001299	Homo sapiens calponin 1, basic, smooth muscle (CNN1), mRNA [NM_001299]	3.33018e-10	4.90944
A_23_P7397	PCDHB10	NM_018930	Homo sapiens protocadherin beta 10 (PCDHB10), mRNA [NM_018930]	5.72101e-09	4.90481
A_23_P217411	SMC1A	NM_006306	Homo sapiens structural maintenance of chromosomes 1A (SMC1A), mRNA [NM_006306]	5.02454e-05	4.90474
A_23_P163390	CHRNA7	NM_000746	Homo sapiens cholinergic receptor, nicotinic, alpha 7 (CHRNA7), mRNA [NM_000746]	2.20886e-08	4.89839
A_23_P257164	AMT	NM_000481	Homo sapiens aminomethyltransferase (AMT), mRNA [NM_000481]	5.72027e-06	4.8924
A_24_P468810	ZBTB8OS	AK056550	Homo sapiens cDNA FLJ31988 fis, clone NT2RP7008863. [AK056550]	0.000303255	4.87765
A_24_P842002	LOC653319	AK092303	Homo sapiens cDNA FLJ34984 fis, clone OCBBF2001639. [AK092303]	1.26608e-06	4.8747
A_23_P29185	TTC28	AB028966	Homo sapiens mRNA for KIAA1043 protein, partial cds. [AB028966]	8.0678e-07	4.87442
A_23_P5831	HPCAL1	NM_134421	Homo sapiens hippocalcin-like 1 (HPCAL1), transcript variant 2, mRNA [NM_134421]	0.000372936	4.86933
A_23_P250800	ST3GAL6	NM_006100	Homo sapiens ST3 beta-galactoside alpha-2,3-sialyltransferase 6 (ST3GAL6), mRNA [NM_006100]	0.000383624	4.86624
A_23_P97932	MSRB2	NM_012228	Homo sapiens methionine sulfoxide reductase B2 (MSRB2), mRNA [NM_012228]	1.08327e-06	4.85924
A_23_P338981	CYGB	NM_134268	Homo sapiens cytoglobin (CYGB), mRNA [NM_134268]	1.05402e-06	4.84796
A_23_P63128	OBSCN	AK024186	Homo sapiens cDNA FLJ14124 fis, clone MAMMA1002498. [AK024186]	2.01342e-05	4.84751
A_32_P224566	LEPR	NM_002303	Homo sapiens leptin receptor (LEPR), transcript variant 1, mRNA [NM_002303]	2.91058e-07	4.84226
A_23_P154338	DUSP16	AB051487	Homo sapiens mRNA for KIAA1700 protein, partial cds. [AB051487]	6.69762e-09	4.83618
A_23_P62188	KIAA1166	NM_018684	Homo sapiens KIAA1166 (KIAA1166), mRNA [NM_018684]	0.00010563	4.82213
A_23_P345065	SCLY	NM_016510	Homo sapiens selenocysteine lyase (SCLY), mRNA [NM_016510]	7.3365e-05	4.8182
A_23_P394259	MPP2	NM_005374	Homo sapiens membrane protein, palmitoylated 2 (MAGUK p55 subfamily member 2) (MPP2), mRNA [NM_005374]	2.70567e-08	4.81424
A_23_P35830	GAL3ST3	NM_033036	Homo sapiens galactose-3-O-sulfotransferase 3 (GAL3ST3), mRNA [NM_033036]	1.32999e-07	4.7985
A_23_P251364	STOX2	NM_020225	Homo sapiens storkhead box 2 (STOX2), mRNA [NM_020225]	0.000258261	4.79704
A_23_P351295	HS3ST5	AK091074	Homo sapiens cDNA FLJ33755 fis, clone BRCAN2000523. [AK091074]	7.57345e-07	4.79009
A_23_P29680	CAMKV	NM_024046	Homo sapiens CaM kinase-like vesicle-associated (CAMKV), mRNA [NM_024046]	1.67143e-07	4.78051
A_24_P167642	GCH1	NM_000161	Homo sapiens GTP cyclohydrolase 1 (dopa-responsive dystonia) (GCH1), transcript variant 1, mRNA [NM_000161]	1.50122e-06	4.77753
A_32_P101031	LYNX1	NM_177458	Homo sapiens Ly6/neurotoxin 1 (LYNX1), transcript variant SLURP2, mRNA [NM_177458]	6.27017e-05	4.76841
A_24_P119665	SYNPO2	AL833294	Homo sapiens mRNA; cDNA DKFZp451G189 (from clone DKFZp451G189). [AL833294]	1.37062e-05	4.76399
A_24_P203689	KIF7	NM_198525	Homo sapiens kinesin family member 7 (KIF7), mRNA [NM_198525]	8.99625e-07	4.75715
A_23_P19987	IGF2BP3	NM_006547	Homo sapiens insulin-like growth factor 2 mRNA binding protein 3 (IGF2BP3), mRNA [NM_006547]	0.00673069	4.74752
A_23_P144476	SPRY1	NM_199327	Homo sapiens sprouty homolog 1, antagonist of FGF signaling (Drosophila) (SPRY1), transcript variant 2, mRNA [NM_199327]	5.70217e-06	4.74046
A_23_P109427	GSTT1	NM_000853	Homo sapiens glutathione S-transferase theta 1 (GSTT1), mRNA [NM_000853]	0.00286764	4.73145
A_24_P35400	SARDH	NM_007101	Homo sapiens sarcosine dehydrogenase (SARDH), mRNA [NM_007101]	1.66989e-06	4.73138
A_24_P118211	LSP1	AF289610	Homo sapiens clone pp9372 unknown mRNA. [AF289610]	5.14286e-06	4.72916
A_32_P73796	PPM1E	NM_014906	Homo sapiens protein phosphatase 1E (PP2C domain containing) (PPM1E), mRNA [NM_014906]	2.78169e-07	4.72826
A_23_P73150	TTC25	NM_031421	Homo sapiens tetratricopeptide repeat domain 25 (TTC25), mRNA [NM_031421]	0.000328858	4.72778
A_23_P102508	SLC5A6	NM_021095	Homo sapiens solute carrier family 5 (sodium-dependent vitamin transporter), member 6 (SLC5A6), mRNA [NM_021095]	1.38762e-06	4.72088
A_32_P52785	DAAM2	NM_015345	Homo sapiens dishevelled associated activator of morphogenesis 2 (DAAM2), mRNA [NM_015345]	1.25139e-11	4.71904
A_23_P1322	AKR1CL2	AB040820	Homo sapiens mRNA for aldo-keto reductase related protein 1, complete cds. [AB040820]	2.49551e-08	4.70493
A_23_P74663	TAF1A	NM_005681	Homo sapiens TATA box binding protein (TBP)-associated factor, RNA polymerase I, A, 48kDa (TAF1A), transcript variant 1, mRNA [NM_005681]	6.40402e-05	4.70245
A_23_P131202	HES6	NM_018645	Homo sapiens hairy and enhancer of split 6 (Drosophila) (HES6), mRNA [NM_018645]	0.00815671	4.70241
A_23_P19115	GSPT2	NM_018094	Homo sapiens G1 to S phase transition 2 (GSPT2), mRNA [NM_018094]	2.37493e-05	4.6961
A_23_P29153	RTDR1	NM_014433	Homo sapiens rhabdoid tumor deletion region gene 1 (RTDR1), mRNA [NM_014433]	1.90215e-08	4.69101
A_23_P213288	SCD5	BC004936	Homo sapiens stearoyl-CoA desaturase 5, mRNA (cDNA clone MGC:10777 IMAGE:3607979), complete cds. [BC004936]	0.0027095	4.686
A_23_P94517	DAPK1	NM_004938	Homo sapiens death-associated protein kinase 1 (DAPK1), mRNA [NM_004938]	9.47678e-06	4.68337
A_23_P2355	CBX5	NM_012117	Homo sapiens chromobox homolog 5 (HP1 alpha homolog, Drosophila) (CBX5), mRNA [NM_012117]	1.99336e-05	4.68311
A_24_P322474	PDE4A	NM_006202	Homo sapiens phosphodiesterase 4A, cAMP-specific (phosphodiesterase E2 dunce homolog, Drosophila) (PDE4A), mRNA [NM_006202]	0.00451591	4.68286
A_32_P172141	CDC14B	NM_033331	Homo sapiens CDC14 cell division cycle 14 homolog B (S. cerevisiae) (CDC14B), transcript variant 2, mRNA [NM_033331]	6.64904e-05	4.67135
A_24_P93948	KIF1A	NM_004321	Homo sapiens kinesin family member 1A (KIF1A), mRNA [NM_004321]	6.07668e-10	4.66295
A_23_P102391	SLC40A1	NM_014585	Homo sapiens solute carrier family 40 (iron-regulated transporter), member 1 (SLC40A1), mRNA [NM_014585]	8.23298e-07	4.6581
A_23_P71821	PBX3	NM_006195	Homo sapiens pre-B-cell leukemia transcription factor 3 (PBX3), mRNA [NM_006195]	4.66997e-05	4.64864
A_23_P84736	CTNNA2	NM_004389	Homo sapiens catenin (cadherin-associated protein), alpha 2 (CTNNA2), mRNA [NM_004389]	1.60793e-07	4.64752
A_24_P3249	RARB	NM_000965	Homo sapiens retinoic acid receptor, beta (RARB), transcript variant 1, mRNA [NM_000965]	2.67851e-07	4.63043
A_23_P131646	RPIA	NM_144563	Homo sapiens ribose 5-phosphate isomerase A (ribose 5-phosphate epimerase) (RPIA), mRNA [NM_144563]	0.000774746	4.62999
A_32_P27535	C17orf72	BC045676	Homo sapiens chromosome 17 open reading frame 72, mRNA (cDNA clone IMAGE:5299340). [BC045676]	2.26437e-05	4.62687
A_23_P106405	NDN	NM_002487	Homo sapiens necdin homolog (mouse) (NDN), mRNA [NM_002487]	1.67559e-07	4.62624
A_23_P39574	FLJ30901	AK055463	Homo sapiens cDNA FLJ30901 fis, clone FEBRA2005778, weakly similar to INTEGUMENTARY MUCIN A.1 PRECURSOR. [AK055463]	0.00254712	4.62254
A_23_P88678	C15orf27	NM_152335	Homo sapiens chromosome 15 open reading frame 27 (C15orf27), mRNA [NM_152335]	1.93497e-05	4.62151
A_23_P159907	MAGED4	NM_030801	Homo sapiens melanoma antigen family D, 4 (MAGED4), transcript variant 1, mRNA [NM_030801]	0.00756139	4.61577
A_24_P93741	LIN28B	NM_001004317	Homo sapiens lin-28 homolog B (C. elegans) (LIN28B), mRNA [NM_001004317]	4.18474e-05	4.61289
A_23_P21640	CHD3	NM_001005273	Homo sapiens chromodomain helicase DNA binding protein 3 (CHD3), transcript variant 1, mRNA [NM_001005273]	1.14235e-05	4.60468
A_23_P258982	PKN3	NM_013355	Homo sapiens protein kinase N3 (PKN3), mRNA [NM_013355]	1.16865e-05	4.59285
A_24_P393864	PHTF1	NM_006608	Homo sapiens putative homeodomain transcription factor 1 (PHTF1), mRNA [NM_006608]	1.41577e-05	4.59087
A_32_P226907	LOC284112	AK098506	Homo sapiens cDNA FLJ25640 fis, clone STM04823. [AK098506]	9.59967e-11	4.5768
A_23_P53838	IRS2	NM_003749	Homo sapiens insulin receptor substrate 2 (IRS2), mRNA [NM_003749]	3.05345e-06	4.57285
A_23_P62967	DGKB	NM_145695	Homo sapiens diacylglycerol kinase, beta 90kDa (DGKB), transcript variant 2, mRNA [NM_145695]	0.00421432	4.5684
A_23_P62807	SCCPDH	NM_016002	Homo sapiens saccharopine dehydrogenase (putative) (SCCPDH), mRNA [NM_016002]	0.00224077	4.55287
A_23_P59691	PAX4	NM_006193	Homo sapiens paired box gene 4 (PAX4), mRNA [NM_006193]	1.2266e-07	4.55266
A_24_P408083	DNMT1	NM_001379	Homo sapiens DNA (cytosine-5-)-methyltransferase 1 (DNMT1), mRNA [NM_001379]	0.0053408	4.55046
A_32_P195401	ALMS1	NM_015120	Homo sapiens Alstrom syndrome 1 (ALMS1), mRNA [NM_015120]	8.58477e-05	4.55027
A_23_P94380	C5orf5	NM_016603	Homo sapiens chromosome 5 open reading frame 5 (C5orf5), mRNA [NM_016603]	0.00105282	4.54935
A_23_P216501	TPM2	NM_213674	Homo sapiens tropomyosin 2 (beta) (TPM2), transcript variant 2, mRNA [NM_213674]	0.00223846	4.54928
A_32_P197016	RFC3	NM_002915	Homo sapiens replication factor C (activator 1) 3, 38kDa (RFC3), transcript variant 1, mRNA [NM_002915]	3.80953e-05	4.54596
A_23_P374104	ANGPTL2	NM_012098	Homo sapiens angiopoietin-like 2 (ANGPTL2), mRNA [NM_012098]	5.30638e-10	4.54244
A_23_P45940	TFB2M	NM_022366	Homo sapiens transcription factor B2, mitochondrial (TFB2M), mRNA [NM_022366]	1.32374e-06	4.53819
A_23_P500734	POGZ	NM_015100	Homo sapiens pogo transposable element with ZNF domain (POGZ), transcript variant 1, mRNA [NM_015100]	3.55845e-06	4.53178
A_23_P251962	ZNF273	NM_021148	Homo sapiens zinc finger protein 273 (ZNF273), transcript variant 1, mRNA [NM_021148]	1.77935e-05	4.52926
A_23_P398566	NR4A3	NM_173198	Homo sapiens nuclear receptor subfamily 4, group A, member 3 (NR4A3), transcript variant 2, mRNA [NM_173198]	9.21885e-06	4.52551
A_23_P143817	MYLK	NM_053025	Homo sapiens myosin, light polypeptide kinase (MYLK), transcript variant 1, mRNA [NM_053025]	1.99805e-06	4.52503
A_23_P149476	EFCAB2	NM_032328	Homo sapiens EF-hand calcium binding domain 2 (EFCAB2), mRNA [NM_032328]	0.00114834	4.52042
A_23_P28898	PLCB4	NM_000933	Homo sapiens phospholipase C, beta 4 (PLCB4), transcript variant 1, mRNA [NM_000933]	1.81837e-06	4.51879
A_23_P137035	PIR	NM_003662	Homo sapiens pirin (iron-binding nuclear protein) (PIR), transcript variant 1, mRNA [NM_003662]	4.87246e-05	4.51635
A_23_P434944	IGFBPL1	AK131521	Homo sapiens cDNA FLJ41041 fis, clone NT2RI2004312. [AK131521]	1.82408e-05	4.51496
A_23_P88303	HSPA2	NM_021979	Homo sapiens heat shock 70kDa protein 2 (HSPA2), mRNA [NM_021979]	0.00847293	4.51379
A_24_P290751	DTX1	NM_004416	Homo sapiens deltex homolog 1 (Drosophila) (DTX1), mRNA [NM_004416]	2.109e-06	4.51067
A_23_P5342	LRP1B	NM_018557	Homo sapiens low density lipoprotein-related protein 1B (deleted in tumors) (LRP1B), mRNA [NM_018557]	1.02836e-06	4.50448
A_23_P4808	PTGER1	NM_000955	Homo sapiens prostaglandin E receptor 1 (subtype EP1), 42kDa (PTGER1), mRNA [NM_000955]	1.80849e-06	4.50344
A_23_P164415	CCDC40	AK000760	Homo sapiens cDNA FLJ20753 fis, clone HEP02714. [AK000760]	2.06987e-06	4.49964
A_23_P217428	ARHGAP6	NM_001174	Homo sapiens Rho GTPase activating protein 6 (ARHGAP6), transcript variant 2, mRNA [NM_001174]	7.83553e-08	4.4977
A_23_P136817	KNTC1	NM_014708	Homo sapiens kinetochore associated 1 (KNTC1), mRNA [NM_014708]	0.00414533	4.49686
A_24_P916141	WDR68	NM_005828	Homo sapiens WD repeat domain 68 (WDR68), mRNA [NM_005828]	2.50416e-06	4.49647
A_23_P16022	ZNF256	NM_005773	Homo sapiens zinc finger protein 256 (ZNF256), mRNA [NM_005773]	0.00520934	4.49062
A_23_P201047	THBS3	NM_007112	Homo sapiens thrombospondin 3 (THBS3), mRNA [NM_007112]	0.000222772	4.48959
A_23_P77993	C1QL1	NM_006688	Homo sapiens complement component 1, q subcomponent-like 1 (C1QL1), mRNA [NM_006688]	5.33637e-10	4.48512
A_23_P395374	HIST1H4D	NM_003539	Homo sapiens histone 1, H4d (HIST1H4D), mRNA [NM_003539]	7.0375e-07	4.48044
A_23_P254612	DBC1	BC021560	Homo sapiens deleted in bladder cancer 1, mRNA (cDNA clone IMAGE:4591607), complete cds. [BC021560]	0.00650518	4.47969
A_23_P203920	SSPN	NM_005086	Homo sapiens sarcospan (Kras oncogene-associated gene) (SSPN), mRNA [NM_005086]	0.00310042	4.47021
A_24_P94402	MXRA7	NM_001008529	Homo sapiens matrix-remodelling associated 7 (MXRA7), transcript variant 2, mRNA [NM_001008529]	1.30972e-09	4.45928
A_24_P158536	RHOBTB1	NM_014836	Homo sapiens Rho-related BTB domain containing 1 (RHOBTB1), transcript variant 1, mRNA [NM_014836]	1.33566e-05	4.4517
A_23_P415663	TIGD3	NM_145719	Homo sapiens tigger transposable element derived 3 (TIGD3), mRNA [NM_145719]	2.92093e-07	4.45157
A_23_P383118	ZSWIM5	AB040944	Homo sapiens mRNA for KIAA1511 protein, partial cds. [AB040944]	2.05808e-10	4.45038
A_23_P300220	YPEL4	NM_145008	Homo sapiens yippee-like 4 (Drosophila) (YPEL4), mRNA [NM_145008]	0.00307358	4.44991
A_23_P75063	DYDC2	NM_032372	Homo sapiens DPY30 domain containing 2 (DYDC2), mRNA [NM_032372]	3.83454e-09	4.44979
A_23_P25615	SOHLH2	NM_017826	Homo sapiens spermatogenesis and oogenesis specific basic helix-loop-helix 2 (SOHLH2), mRNA [NM_017826]	9.45263e-07	4.4474
A_23_P35995	ASAM	NM_024769	Homo sapiens adipocyte-specific adhesion molecule (ASAM), mRNA [NM_024769]	0.00808546	4.43479
A_24_P88266	PROX1	NM_002763	Homo sapiens prospero-related homeobox 1 (PROX1), mRNA [NM_002763]	3.50902e-07	4.4337
A_23_P43726	NUP160	NM_015231	Homo sapiens nucleoporin 160kDa (NUP160), mRNA [NM_015231]	1.68198e-08	4.42989
A_23_P433016	FAM78A	NM_033387	Homo sapiens family with sequence similarity 78, member A (FAM78A), mRNA [NM_033387]	6.98139e-05	4.4243
A_23_P425880	TRIO	NM_007118	Homo sapiens triple functional domain (PTPRF interacting) (TRIO), mRNA [NM_007118]	5.20329e-05	4.41397
A_23_P161837	MRVI1	NM_130385	Homo sapiens murine retrovirus integration site 1 homolog (MRVI1), transcript variant 2, mRNA [NM_130385]	9.33161e-09	4.40766
A_23_P141415	MYCBPAP	NM_032133	Homo sapiens MYCBP associated protein (MYCBPAP), mRNA [NM_032133]	1.83053e-06	4.39941
A_24_P105191	HS6ST2	NM_147175	Homo sapiens heparan sulfate 6-O-sulfotransferase 2 (HS6ST2), mRNA [NM_147175]	6.32486e-06	4.39216
A_23_P42251	PRR3	NM_025263	Homo sapiens proline rich 3 (PRR3), mRNA [NM_025263]	8.48663e-05	4.38302
A_24_P838448	FLJ22536	AK022865	Homo sapiens cDNA FLJ12803 fis, clone NT2RP2002172. [AK022865]	0.00193612	4.36719
A_23_P22364	GRID1	NM_017551	Homo sapiens glutamate receptor, ionotropic, delta 1 (GRID1), mRNA [NM_017551]	5.50364e-07	4.36022
A_32_P42574	C1orf198	NM_032800	Homo sapiens chromosome 1 open reading frame 198 (C1orf198), mRNA [NM_032800]	6.23664e-08	4.33351
A_23_P19852	IQCE	AB028946	Homo sapiens mRNA for KIAA1023 protein, partial cds. [AB028946]	9.45403e-05	4.32817
A_23_P500034	GLI2	NM_005270	Homo sapiens GLI-Kruppel family member GLI2 (GLI2), mRNA [NM_005270]	5.65273e-13	4.32654
A_23_P92928	C6	NM_000065	Homo sapiens complement component 6 (C6), mRNA [NM_000065]	5.57971e-08	4.32605
A_24_P414719	FLJ11236	AK002098	Homo sapiens cDNA FLJ11236 fis, clone PLACE1008524. [AK002098]	0.000917643	4.32585
A_32_P126157	ST6GAL2	AB058780	Homo sapiens mRNA for KIAA1877 protein, partial cds. [AB058780]	6.6523e-10	4.31962
A_23_P157117	CREB5	NM_182898	Homo sapiens cAMP responsive element binding protein 5 (CREB5), transcript variant 1, mRNA [NM_182898]	2.61992e-06	4.31733
A_32_P15544	PRIMA1	NM_178013	Homo sapiens proline rich membrane anchor 1 (PRIMA1), mRNA [NM_178013]	2.33073e-08	4.30802
A_23_P10743	PDE6B	NM_000283	Homo sapiens phosphodiesterase 6B, cGMP-specific, rod, beta (congenital stationary night blindness 3, autosomal dominant) (PDE6B), mRNA [NM_000283]	4.62181e-07	4.30775
A_23_P126649	PGBD5	NM_024554	Homo sapiens piggyBac transposable element derived 5 (PGBD5), mRNA [NM_024554]	3.99304e-09	4.30547
A_24_P123385	MAP1B	NM_005909	Homo sapiens microtubule-associated protein 1B (MAP1B), transcript variant 1, mRNA [NM_005909]	0.000389547	4.30164
A_23_P213166	LOC91431	NM_138698	Homo sapiens prematurely terminated mRNA decay factor-like (LOC91431), mRNA [NM_138698]	0.00605969	4.29796
A_24_P570583	ZNF542	NM_194319	Homo sapiens zinc finger protein 542 (ZNF542), mRNA [NM_194319]	0.000967834	4.29357
A_23_P216610	SUSD1	NM_022486	Homo sapiens sushi domain containing 1 (SUSD1), mRNA [NM_022486]	0.00023477	4.2929
A_23_P76774	GRM7	NM_181874	Homo sapiens glutamate receptor, metabotropic 7 (GRM7), transcript variant 2, mRNA [NM_181874]	0.00836612	4.28863
A_23_P387630	STARD8	NM_014725	Homo sapiens START domain containing 8 (STARD8), mRNA [NM_014725]	1.74198e-06	4.28769
A_32_P130788	SAMD13	NM_001010971	Homo sapiens sterile alpha motif domain containing 13 (SAMD13), mRNA [NM_001010971]	1.81079e-06	4.28724
A_23_P360874	DKFZp434K1815	NM_152892	Homo sapiens hypothetical protein DKFZp434K1815 (DKFZp434K1815), mRNA [NM_152892]	6.3227e-05	4.28695
A_23_P202837	CCND1	NM_053056	Homo sapiens cyclin D1 (CCND1), mRNA [NM_053056]	0.00675119	4.27902
A_32_P155016	CTXN1	NM_206833	Homo sapiens cortexin 1 (CTXN1), mRNA [NM_206833]	1.55426e-08	4.27551
A_24_P132099	HMGN3	NM_138730	Homo sapiens high mobility group nucleosomal binding domain 3 (HMGN3), transcript variant 2, mRNA [NM_138730]	0.000185137	4.25821
A_23_P354908	NCAM1	NM_000615	Homo sapiens neural cell adhesion molecule 1 (NCAM1), transcript variant 1, mRNA [NM_000615]	0.00115625	4.25488
A_23_P3921	FLJ10324	AB058752	Homo sapiens mRNA for KIAA1849 protein, partial cds. [AB058752]	3.63455e-05	4.25468
A_23_P83368	WWOX	NM_130844	Homo sapiens WW domain containing oxidoreductase (WWOX), transcript variant 3, mRNA [NM_130844]	0.000365656	4.25019
A_23_P84922	HDAC8	NM_018486	Homo sapiens histone deacetylase 8 (HDAC8), mRNA [NM_018486]	0.000313402	4.2491
A_24_P65060	RKHD3	NM_032246	Homo sapiens ring finger and KH domain containing 3 (RKHD3), mRNA [NM_032246]	0.00793317	4.24799
A_24_P261470	NRXN2	NM_138732	Homo sapiens neurexin 2 (NRXN2), transcript variant alpha-2, mRNA [NM_138732]	5.15016e-08	4.24764
A_23_P43679	ZNF618	NM_133374	Homo sapiens zinc finger protein 618 (ZNF618), mRNA [NM_133374]	0.00290159	4.24616
A_23_P148753	PLEKHA6	NM_014935	Homo sapiens pleckstrin homology domain containing, family A member 6 (PLEKHA6), mRNA [NM_014935]	0.00585321	4.2412
A_24_P151727	NONO	NM_007363	Homo sapiens non-POU domain containing, octamer-binding (NONO), mRNA [NM_007363]	9.76107e-07	4.23811
A_23_P208158	DTNA	NM_001392	Homo sapiens dystrobrevin, alpha (DTNA), transcript variant 7, mRNA [NM_001392]	0.000287516	4.21866
A_23_P374767	UBE2D4	NM_015983	Homo sapiens ubiquitin-conjugating enzyme E2D 4 (putative) (UBE2D4), mRNA [NM_015983]	5.10341e-07	4.21694
A_24_P150791	JPH3	NM_020655	Homo sapiens junctophilin 3 (JPH3), mRNA [NM_020655]	1.68565e-06	4.21664
A_23_P56590	C1D	NM_006333	Homo sapiens nuclear DNA-binding protein (C1D), transcript variant 1, mRNA [NM_006333]	8.69615e-06	4.20421
A_23_P210835	MYT1	NM_004535	Homo sapiens myelin transcription factor 1 (MYT1), mRNA [NM_004535]	3.18388e-09	4.2035
A_23_P331895	TTYH3	NM_025250	Homo sapiens tweety homolog 3 (Drosophila) (TTYH3), mRNA [NM_025250]	0.000273194	4.20324
A_24_P372613	APBB1	NM_001164	Homo sapiens amyloid beta (A4) precursor protein-binding, family B, member 1 (Fe65) (APBB1), transcript variant 1, mRNA [NM_001164]	0.000613651	4.19645
A_23_P254816	TCF15	NM_004609	Homo sapiens transcription factor 15 (basic helix-loop-helix) (TCF15), mRNA [NM_004609]	0.000249082	4.19535
A_23_P374351	KCTD20	NM_173562	Homo sapiens potassium channel tetramerisation domain containing 20 (KCTD20), mRNA [NM_173562]	4.24077e-07	4.19119
A_23_P167509	CYFIP2	NM_001037332	Homo sapiens cytoplasmic FMR1 interacting protein 2 (CYFIP2), transcript variant 2, mRNA [NM_001037332]	0.00228297	4.18587
A_23_P207520	COL1A1	Z74615	H.sapiens mRNA for prepro-alpha1(I) collagen. [Z74615]	2.69801e-05	4.18361
A_32_P99055	WNK3	NM_020922	Homo sapiens WNK lysine deficient protein kinase 3 (WNK3), transcript variant 1, mRNA [NM_020922]	6.07844e-06	4.18128
A_23_P384635	DZIP1L	NM_173543	Homo sapiens DAZ interacting protein 1-like (DZIP1L), mRNA [NM_173543]	1.70854e-07	4.18055
A_23_P64898	KLF15	NM_014079	Homo sapiens Kruppel-like factor 15 (KLF15), mRNA [NM_014079]	1.29313e-05	4.17858
A_23_P50376	ZNF331	NM_018555	Homo sapiens zinc finger protein 331 (ZNF331), mRNA [NM_018555]	4.68575e-06	4.16512
A_23_P210048	GULP1	NM_016315	Homo sapiens GULP, engulfment adaptor PTB domain containing 1 (GULP1), mRNA [NM_016315]	2.91797e-06	4.16509
A_23_P207414	ODZ3	AB040888	Homo sapiens mRNA for KIAA1455 protein, partial cds. [AB040888]	4.19795e-06	4.15868
A_23_P114689	DDEFL1	NM_017707	Homo sapiens development and differentiation enhancing factor-like 1 (DDEFL1), mRNA [NM_017707]	0.00168461	4.15674
A_23_P20392	PSD3	NM_015310	Homo sapiens pleckstrin and Sec7 domain containing 3 (PSD3), transcript variant 1, mRNA [NM_015310]	0.000537986	4.14423
A_23_P321201	RAB6IP1	NM_015213	Homo sapiens RAB6 interacting protein 1 (RAB6IP1), mRNA [NM_015213]	2.13957e-06	4.1395
A_24_P115007	ADRBK2	NM_005160	Homo sapiens adrenergic, beta, receptor kinase 2 (ADRBK2), mRNA [NM_005160]	0.00109361	4.13399
A_24_P331655	LOC494150	BC014228	Homo sapiens prohibitin pseudogene, mRNA (cDNA clone MGC:20874 IMAGE:4547239), complete cds. [BC014228]	0.000539267	4.13197
A_23_P42087	BPHL	NM_004332	Homo sapiens biphenyl hydrolase-like (serine hydrolase; breast epithelial mucin-associated antigen) (BPHL), mRNA [NM_004332]	4.38735e-09	4.12967
A_23_P151297	TENC1	NM_015319	Homo sapiens tensin like C1 domain containing phosphatase (tensin 2) (TENC1), transcript variant 1, mRNA [NM_015319]	0.000209739	4.12797
A_23_P132499	IL17RD	NM_017563	Homo sapiens interleukin 17 receptor D (IL17RD), mRNA [NM_017563]	1.80393e-07	4.12669
A_23_P254165	RAI2	NM_021785	Homo sapiens retinoic acid induced 2 (RAI2), mRNA [NM_021785]	4.52989e-09	4.12166
A_24_P532180	LOC90246	AK023635	Homo sapiens cDNA FLJ13573 fis, clone PLACE1008584. [AK023635]	5.28732e-07	4.11569
A_23_P168551	SLC29A4	NM_153247	Homo sapiens solute carrier family 29 (nucleoside transporters), member 4 (SLC29A4), transcript variant 2, mRNA [NM_153247]	0.00316823	4.10908
A_24_P231132	ACVR2B	NM_001106	Homo sapiens activin A receptor, type IIB (ACVR2B), mRNA [NM_001106]	0.000276034	4.1063
A_32_P9963	HSF2	NM_004506	Homo sapiens heat shock transcription factor 2 (HSF2), mRNA [NM_004506]	4.35947e-06	4.10196
A_23_P259344	CECR6	NM_031890	Homo sapiens cat eye syndrome chromosome region, candidate 6 (CECR6), mRNA [NM_031890]	3.66028e-09	4.10115
A_23_P357724	KATNAL2	NM_031303	Homo sapiens katanin p60 subunit A-like 2 (KATNAL2), mRNA [NM_031303]	3.0019e-07	4.09175
A_23_P116114	PDE3B	NM_000922	Homo sapiens phosphodiesterase 3B, cGMP-inhibited (PDE3B), mRNA [NM_000922]	1.40351e-07	4.08889
A_23_P61180	PLCXD1	NM_018390	Homo sapiens phosphatidylinositol-specific phospholipase C, X domain containing 1 (PLCXD1), mRNA [NM_018390]	0.00117599	4.08814
A_24_P940006	EFHD1	NM_025202	Homo sapiens EF-hand domain family, member D1 (EFHD1), mRNA [NM_025202]	0.00385569	4.0841
A_23_P77048	SLC25A29	NM_152333	Homo sapiens solute carrier family 25, member 29 (SLC25A29), transcript variant 2, mRNA [NM_152333]	4.34801e-07	4.07988
A_24_P147765	FOXRED2	NM_024955	Homo sapiens FAD-dependent oxidoreductase domain containing 2 (FOXRED2), mRNA [NM_024955]	3.6348e-06	4.07479
A_23_P334608	GUSB	NM_000181	Homo sapiens glucuronidase, beta (GUSB), mRNA [NM_000181]	4.24764e-05	4.07172
A_24_P197196	ABCB6	NM_005689	Homo sapiens ATP-binding cassette, sub-family B (MDR/TAP), member 6 (ABCB6), nuclear gene encoding mitochondrial protein, mRNA [NM_005689]	0.000344463	4.07112
A_32_P188953	C21orf34	NM_001005732	Homo sapiens chromosome 21 open reading frame 34 (C21orf34), transcript variant 1, mRNA [NM_001005732]	0.00379731	4.06836
A_24_P378928	ADD2	NM_017488	Homo sapiens adducin 2 (beta) (ADD2), transcript variant beta-4, mRNA [NM_017488]	1.23571e-06	4.06481
A_23_P107247	C9orf58	NM_001002260	Homo sapiens chromosome 9 open reading frame 58 (C9orf58), transcript variant 2, mRNA [NM_001002260]	5.41764e-09	4.0622
A_24_P380628	KIAA0738	NM_014719	Homo sapiens KIAA0738 gene product (KIAA0738), mRNA [NM_014719]	1.29805e-05	4.05826
A_23_P150807	PPFIBP2	NM_003621	Homo sapiens PTPRF interacting protein, binding protein 2 (liprin beta 2) (PPFIBP2), mRNA [NM_003621]	0.00161727	4.05816
A_23_P159027	ZNF521	NM_015461	Homo sapiens zinc finger protein 521 (ZNF521), mRNA [NM_015461]	5.33752e-08	4.05542
A_24_P97849	DBN1	NM_080881	Homo sapiens drebrin 1 (DBN1), transcript variant 2, mRNA [NM_080881]	4.82282e-08	4.05424
A_24_P5994	TSPYL3	NR_002781	Homo sapiens TSPY-like 3 (pseudogene) (TSPYL3) on chromosome 20 [NR_002781]	1.89853e-08	4.05217
A_23_P15272	AARSD1	NM_025267	Homo sapiens alanyl-tRNA synthetase domain containing 1 (AARSD1), mRNA [NM_025267]	1.17681e-07	4.04632
A_23_P138168	CNN3	NM_001839	Homo sapiens calponin 3, acidic (CNN3), mRNA [NM_001839]	0.000177235	4.04298
A_23_P500410	ATP6V1G2	NM_130463	Homo sapiens ATPase, H+ transporting, lysosomal 13kDa, V1 subunit G2 (ATP6V1G2), transcript variant 1, mRNA [NM_130463]	7.91974e-06	4.03541
A_23_P145984	TSPAN12	NM_012338	Homo sapiens tetraspanin 12 (TSPAN12), mRNA [NM_012338]	7.2508e-05	4.03216
A_24_P112803	SOX1	NM_005986	Homo sapiens SRY (sex determining region Y)-box 1 (SOX1), mRNA [NM_005986]	0.00294874	4.03108
A_23_P354798	COQ10A	NM_144576	Homo sapiens coenzyme Q10 homolog A (S. cerevisiae) (COQ10A), mRNA [NM_144576]	1.83608e-06	4.02639
A_23_P25873	WDHD1	AY517556	Homo sapiens hypothetical rhabdomyosarcoma antigen MU-RMS-40.1 mRNA, partial cds. [AY517556]	0.00988756	4.01601
A_23_P109812	SYN2	NM_133625	Homo sapiens synapsin II (SYN2), transcript variant IIa, mRNA [NM_133625]	2.61927e-09	4.01418
A_23_P214603	FLOT1	NM_005803	Homo sapiens flotillin 1 (FLOT1), mRNA [NM_005803]	0.00177866	4.01404
A_23_P259641	EZH2	NM_004456	Homo sapiens enhancer of zeste homolog 2 (Drosophila) (EZH2), transcript variant 1, mRNA [NM_004456]	1.91169e-05	4.01012
A_23_P138058	NMNAT2	NM_015039	Homo sapiens nicotinamide nucleotide adenylyltransferase 2 (NMNAT2), transcript variant 1, mRNA [NM_015039]	1.64143e-06	4.00521
A_23_P134684	HMBOX1	NM_024567	Homo sapiens homeobox containing 1 (HMBOX1), mRNA [NM_024567]	6.42881e-06	4.0037
A_23_P127565	KNDC1	NM_152643	Homo sapiens kinase non-catalytic C-lobe domain (KIND) containing 1 (KNDC1), transcript variant 1, mRNA [NM_152643]	0.00159494	3.99633
A_23_P74088	MMP23B	NM_006983	Homo sapiens matrix metallopeptidase 23B (MMP23B), mRNA [NM_006983]	1.39296e-08	3.99375
A_24_P39843	CRB1	NM_201253	Homo sapiens crumbs homolog 1 (Drosophila) (CRB1), mRNA [NM_201253]	2.46567e-07	3.98243
A_23_P119778	SLC39A10	NM_020342	Homo sapiens solute carrier family 39 (zinc transporter), member 10 (SLC39A10), mRNA [NM_020342]	0.00152785	3.9802
A_23_P371495	TMTC1	NM_175861	Homo sapiens transmembrane and tetratricopeptide repeat containing 1 (TMTC1), mRNA [NM_175861]	0.000519706	3.97795
A_23_P212050	BCHE	NM_000055	Homo sapiens butyrylcholinesterase (BCHE), mRNA [NM_000055]	0.000108285	3.97193
A_23_P106887	FUS	NM_004960	Homo sapiens fusion (involved in t(12;16) in malignant liposarcoma) (FUS), transcript variant 1, mRNA [NM_004960]	8.30396e-05	3.96734
A_24_P169258	TBCD	NM_005993	Homo sapiens tubulin-specific chaperone d (TBCD), transcript variant 1, mRNA [NM_005993]	5.85535e-06	3.96406
A_24_P208909	TRIM2	NM_015271	Homo sapiens tripartite motif-containing 2 (TRIM2), mRNA [NM_015271]	0.000470291	3.96368
A_23_P80473	CHST13	NM_152889	Homo sapiens carbohydrate (chondroitin 4) sulfotransferase 13 (CHST13), mRNA [NM_152889]	0.000107092	3.95746
A_23_P153489	CLEC11A	NM_002975	Homo sapiens C-type lectin domain family 11, member A (CLEC11A), mRNA [NM_002975]	1.95611e-07	3.95364
A_23_P21063	SCN5A	NM_000335	Homo sapiens sodium channel, voltage-gated, type V, alpha (long QT syndrome 3) (SCN5A), transcript variant 2, mRNA [NM_000335]	6.92708e-06	3.95298
A_23_P217178	MAGEC1	NM_005462	Homo sapiens melanoma antigen family C, 1 (MAGEC1), mRNA [NM_005462]	8.59173e-07	3.95236
A_24_P200427	PAICS	NM_006452	Homo sapiens phosphoribosylaminoimidazole carboxylase, phosphoribosylaminoimidazole succinocarboxamide synthetase (PAICS), mRNA [NM_006452]	0.00325613	3.94751
A_23_P8400	CDK5	NM_004935	Homo sapiens cyclin-dependent kinase 5 (CDK5), mRNA [NM_004935]	0.00162524	3.9463
A_24_P53215	UNC13D	AK024474	Homo sapiens mRNA for FLJ00067 protein, partial cds. [AK024474]	0.00342446	3.93964
A_32_P215938	GPR98	AB075823	Homo sapiens mRNA for KIAA1943 protein. [AB075823]	0.000130275	3.93816
A_23_P88904	NTHL1	NM_002528	Homo sapiens nth endonuclease III-like 1 (E. coli) (NTHL1), mRNA [NM_002528]	0.000521138	3.93286
A_23_P207301	PRR11	AK001891	Homo sapiens cDNA FLJ11029 fis, clone PLACE1004156. [AK001891]	0.00154311	3.92598
A_23_P302005	STON1	NM_006873	Homo sapiens stonin 1 (STON1), mRNA [NM_006873]	0.00834895	3.92168
A_23_P119698	CD320	NM_016579	Homo sapiens CD320 molecule (CD320), mRNA [NM_016579]	0.00410876	3.92166
A_23_P422115	C9orf116	NM_144654	Homo sapiens chromosome 9 open reading frame 116 (C9orf116), mRNA [NM_144654]	7.03367e-06	3.9206
A_23_P1387	APC2	NM_005883	Homo sapiens adenomatosis polyposis coli 2 (APC2), mRNA [NM_005883]	3.90968e-06	3.91984
A_23_P40657	GCAT	NM_014291	Homo sapiens glycine C-acetyltransferase (2-amino-3-ketobutyrate coenzyme A ligase) (GCAT), nuclear gene encoding mitochondrial protein, mRNA [NM_014291]	5.74294e-05	3.91878
A_23_P82088	NRN1	NM_016588	Homo sapiens neuritin 1 (NRN1), mRNA [NM_016588]	1.19362e-06	3.91722
A_24_P38276	FZD1	NM_003505	Homo sapiens frizzled homolog 1 (Drosophila) (FZD1), mRNA [NM_003505]	3.30804e-05	3.91547
A_23_P111981	LYL1	NM_005583	Homo sapiens lymphoblastic leukemia derived sequence 1 (LYL1), mRNA [NM_005583]	0.00034685	3.90397
A_23_P141447	RDM1	NM_145654	Homo sapiens RAD52 motif 1 (RDM1), transcript variant 1, mRNA [NM_145654]	0.00248141	3.89492
A_23_P75790	C11orf9	NM_013279	Homo sapiens chromosome 11 open reading frame 9 (C11orf9), mRNA [NM_013279]	0.00160357	3.88575
A_24_P941353	PCYT1B	NM_004845	Homo sapiens phosphate cytidylyltransferase 1, choline, beta (PCYT1B), mRNA [NM_004845]	3.88358e-07	3.88533
A_23_P157051	AP4M1	NM_004722	Homo sapiens adaptor-related protein complex 4, mu 1 subunit (AP4M1), mRNA [NM_004722]	7.57743e-07	3.88493
A_23_P85598	CABC1	NM_020247	Homo sapiens chaperone, ABC1 activity of bc1 complex like (S. pombe) (CABC1), nuclear gene encoding mitochondrial protein, mRNA [NM_020247]	0.00983186	3.88278
A_24_P130363	C18orf1	NM_181482	Homo sapiens chromosome 18 open reading frame 1 (C18orf1), transcript variant a2, mRNA [NM_181482]	4.13798e-06	3.88125
A_23_P342934	TLE3	AB046767	Homo sapiens mRNA for KIAA1547 protein, partial cds. [AB046767]	4.8953e-06	3.87969
A_23_P380901	PTHR2	NM_005048	Homo sapiens parathyroid hormone receptor 2 (PTHR2), mRNA [NM_005048]	3.42441e-08	3.87513
A_23_P256334	ITGA1	NM_181501	Homo sapiens integrin, alpha 1 (ITGA1), mRNA [NM_181501]	0.000132742	3.87465
A_23_P207131	MAP3K3	NM_203351	Homo sapiens mitogen-activated protein kinase kinase kinase 3 (MAP3K3), transcript variant 1, mRNA [NM_203351]	5.78439e-05	3.87361
A_23_P256455	RPA3	NM_002947	Homo sapiens replication protein A3, 14kDa (RPA3), mRNA [NM_002947]	0.00432157	3.87275
A_23_P376188	C10orf30	BC031618	Homo sapiens chromosome 10 open reading frame 30, mRNA (cDNA clone MGC:35247 IMAGE:5172600), complete cds. [BC031618]	0.000881561	3.87036
A_24_P49383	BGLAP	NM_199173	Homo sapiens bone gamma-carboxyglutamate (gla) protein (osteocalcin) (BGLAP), mRNA [NM_199173]	7.70814e-05	3.86535
A_23_P435051	DZIP3	AB014575	Homo sapiens mRNA for KIAA0675 protein, partial cds. [AB014575]	1.97215e-07	3.86298
A_24_P163574	PERQ1	NM_022574	Homo sapiens PERQ amino acid rich, with GYF domain 1 (PERQ1), mRNA [NM_022574]	5.23996e-06	3.85177
A_23_P7212	CEP170	NM_014812	Homo sapiens centrosomal protein 170kDa (CEP170), transcript variant alpha, mRNA [NM_014812]	2.36202e-05	3.84844
A_24_P813147	TUBB8	NM_177987	Homo sapiens tubulin, beta 8 (TUBB8), mRNA [NM_177987]	0.00852685	3.84115
A_23_P27381	TSHZ1	NM_005786	Homo sapiens teashirt family zinc finger 1 (TSHZ1), mRNA [NM_005786]	8.23687e-06	3.83769
A_23_P144005	C3orf32	NM_015931	Homo sapiens chromosome 3 open reading frame 32 (C3orf32), mRNA [NM_015931]	1.03691e-06	3.83623
A_23_P65890	CIB2	NM_006383	Homo sapiens calcium and integrin binding family member 2 (CIB2), mRNA [NM_006383]	6.77245e-06	3.83436
A_23_P164081	MYH10	NM_005964	Homo sapiens myosin, heavy polypeptide 10, non-muscle (MYH10), mRNA [NM_005964]	0.00021921	3.83101
A_23_P416813	ZNF545	NM_133466	Homo sapiens zinc finger protein 545 (ZNF545), mRNA [NM_133466]	1.49031e-10	3.82852
A_24_P179925	DPM3	NM_018973	Homo sapiens dolichyl-phosphate mannosyltransferase polypeptide 3 (DPM3), transcript variant 1, mRNA [NM_018973]	9.436e-07	3.82776
A_23_P116942	LAG3	NM_002286	Homo sapiens lymphocyte-activation gene 3 (LAG3), mRNA [NM_002286]	1.50635e-05	3.82343
A_24_P148811	RUVBL1	NM_003707	Homo sapiens RuvB-like 1 (E. coli) (RUVBL1), mRNA [NM_003707]	2.67006e-05	3.82205
A_23_P20172	GPR22	NM_005295	Homo sapiens G protein-coupled receptor 22 (GPR22), mRNA [NM_005295]	1.50125e-06	3.82036
A_23_P152559	BZRAP1	NM_004758	Homo sapiens benzodiazapine receptor (peripheral) associated protein 1 (BZRAP1), mRNA [NM_004758]	1.84238e-05	3.81799
A_32_P88791	GSTT2	NM_000854	Homo sapiens glutathione S-transferase theta 2 (GSTT2), mRNA [NM_000854]	0.00634762	3.81298
A_24_P243749	PDK4	NM_002612	Homo sapiens pyruvate dehydrogenase kinase, isozyme 4 (PDK4), mRNA [NM_002612]	9.81156e-08	3.80859
A_23_P424582	EFNB3	NM_001406	Homo sapiens ephrin-B3 (EFNB3), mRNA [NM_001406]	0.00143656	3.79962
A_23_P204998	FARP1	NM_005766	Homo sapiens FERM, RhoGEF (ARHGEF) and pleckstrin domain protein 1 (chondrocyte-derived) (FARP1), transcript variant 1, mRNA [NM_005766]	4.38079e-05	3.79903
A_23_P69573	GUCY1A3	NM_000856	Homo sapiens guanylate cyclase 1, soluble, alpha 3 (GUCY1A3), mRNA [NM_000856]	0.000169156	3.79095
A_23_P45517	PPP2R3B	NM_013239	Homo sapiens protein phosphatase 2 (formerly 2A), regulatory subunit B'', beta (PPP2R3B), transcript variant 1, mRNA [NM_013239]	0.00368216	3.7901
A_32_P118568	RFPL1S	NR_002727	Homo sapiens ret finger protein-like 1 antisense (RFPL1S) on chromosome 22 [NR_002727]	5.21674e-08	3.78334
A_23_P313223	LOC144097	NM_138471	Homo sapiens hypothetical protein BC007540 (LOC144097), mRNA [NM_138471]	4.51384e-07	3.78333
A_32_P146659	LOC401431	NM_001008745	Homo sapiens hypothetical gene LOC401431 (LOC401431), mRNA [NM_001008745]	0.00585957	3.78158
A_23_P67339	RCN3	NM_020650	Homo sapiens reticulocalbin 3, EF-hand calcium binding domain (RCN3), mRNA [NM_020650]	3.15282e-06	3.76918
A_23_P122906	AUTS2	NM_015570	Homo sapiens autism susceptibility candidate 2 (AUTS2), mRNA [NM_015570]	1.33902e-05	3.76621
A_23_P45025	MAPK10	NM_138980	Homo sapiens mitogen-activated protein kinase 10 (MAPK10), transcript variant 3, mRNA [NM_138980]	0.00454293	3.76448
A_23_P427148	PROCA1	NM_152465	Homo sapiens proline-rich cyclin A1-interacting protein (PROCA1), mRNA [NM_152465]	0.000121571	3.76316
A_23_P321160	ZNF594	AB058774	Homo sapiens mRNA for KIAA1871 protein, partial cds. [AB058774]	3.13845e-06	3.76177
A_24_P576445	TBC1D8	NM_007063	Homo sapiens TBC1 domain family, member 8 (with GRAM domain) (TBC1D8), mRNA [NM_007063]	5.94499e-05	3.75506
A_32_P118847	FLJ42709	BC044619	Homo sapiens hypothetical gene supported by AK124699, mRNA (cDNA clone IMAGE:5270292). [BC044619]	4.51283e-05	3.75259
A_23_P73858	TGIF2LY	NM_139214	Homo sapiens TGFB-induced factor 2-like, Y-linked (TGIF2LY), mRNA [NM_139214]	1.98204e-09	3.75041
A_23_P44836	NT5DC2	NM_022908	Homo sapiens 5'-nucleotidase domain containing 2 (NT5DC2), mRNA [NM_022908]	0.00888532	3.74123
A_24_P19228	GAMT	NM_138924	Homo sapiens guanidinoacetate N-methyltransferase (GAMT), transcript variant 2, mRNA [NM_138924]	0.00188919	3.73666
A_23_P207783	TBC1D16	AK091923	Homo sapiens cDNA FLJ34604 fis, clone KIDNE2013413. [AK091923]	0.00060903	3.7347
A_32_P194779	ZBTB34	AB082524	Homo sapiens mRNA for KIAA1993 protein. [AB082524]	6.75862e-07	3.73061
A_23_P62298	NLGN3	NM_018977	Homo sapiens neuroligin 3 (NLGN3), mRNA [NM_018977]	3.96505e-07	3.7287
A_24_P264943	COMP	NM_000095	Homo sapiens cartilage oligomeric matrix protein (COMP), mRNA [NM_000095]	1.99669e-07	3.72457
A_24_P712350	CHML	NM_001821	Homo sapiens choroideremia-like (Rab escort protein 2) (CHML), mRNA [NM_001821]	3.93444e-05	3.71912
A_23_P52121	PDZK1	NM_002614	Homo sapiens PDZ domain containing 1 (PDZK1), mRNA [NM_002614]	1.9265e-06	3.71912
A_23_P138000	SEMA6C	NM_030913	Homo sapiens sema domain, transmembrane domain (TM), and cytoplasmic domain, (semaphorin) 6C (SEMA6C), mRNA [NM_030913]	2.17274e-08	3.71888
A_23_P254193	FLJ20699	NM_017931	Homo sapiens hypothetical protein FLJ20699 (FLJ20699), mRNA [NM_017931]	0.00297872	3.71475
A_24_P110441	tcag7.1017	NM_001004351	Homo sapiens similar to Williams Beuren syndrome chromosome region 19 (MGC57359), mRNA [NM_001004351]	1.92518e-05	3.71097
A_24_P304629	VASH1	NM_014909	Homo sapiens vasohibin 1 (VASH1), mRNA [NM_014909]	1.70117e-07	3.7105
A_23_P24997	CDK4	NM_000075	Homo sapiens cyclin-dependent kinase 4 (CDK4), mRNA [NM_000075]	0.000194741	3.70621
A_23_P207742	THRA	NM_199334	Homo sapiens thyroid hormone receptor, alpha (erythroblastic leukemia viral (v-erb-a) oncogene homolog, avian) (THRA), transcript variant 1, mRNA [NM_199334]	8.3412e-06	3.70509
A_24_P53595	GMCL1	NM_178439	Homo sapiens germ cell-less homolog 1 (Drosophila) (GMCL1), mRNA [NM_178439]	6.30466e-07	3.70505
A_24_P42755	FLT1	NM_002019	Homo sapiens fms-related tyrosine kinase 1 (vascular endothelial growth factor/vascular permeability factor receptor) (FLT1), mRNA [NM_002019]	8.12743e-07	3.7027
A_23_P82588	HSPC268	NM_197964	Homo sapiens hypothetical protein HSPC268 (HSPC268), mRNA [NM_197964]	8.84414e-07	3.70247
A_24_P225468	ANKRD25	NM_015493	Homo sapiens ankyrin repeat domain 25 (ANKRD25), mRNA [NM_015493]	0.00222474	3.6948
A_23_P83453	SMARCC1	NM_003074	Homo sapiens SWI/SNF related, matrix associated, actin dependent regulator of chromatin, subfamily c, member 1 (SMARCC1), mRNA [NM_003074]	4.81317e-07	3.69427
A_24_P243373	PCDHB7	NM_018940	Homo sapiens protocadherin beta 7 (PCDHB7), mRNA [NM_018940]	1.26738e-07	3.69063
A_23_P36546	HNRPK	NM_002140	Homo sapiens heterogeneous nuclear ribonucleoprotein K (HNRPK), transcript variant 1, mRNA [NM_002140]	9.84412e-08	3.68222
A_24_P179816	SLC27A3	NM_024330	Homo sapiens solute carrier family 27 (fatty acid transporter), member 3 (SLC27A3), mRNA [NM_024330]	0.00136615	3.68081
A_23_P60506	C4orf27	NM_017867	Homo sapiens chromosome 4 open reading frame 27 (C4orf27), mRNA [NM_017867]	3.43188e-05	3.67663
A_24_P3415	PPP2R2C	NM_020416	Homo sapiens protein phosphatase 2 (formerly 2A), regulatory subunit B (PR 52), gamma isoform (PPP2R2C), transcript variant 1, mRNA [NM_020416]	0.000191972	3.67473
A_23_P382705	TMTC2	NM_152588	Homo sapiens transmembrane and tetratricopeptide repeat containing 2 (TMTC2), mRNA [NM_152588]	2.37061e-09	3.6718
A_23_P256473	SEMA3C	NM_006379	Homo sapiens sema domain, immunoglobulin domain (Ig), short basic domain, secreted, (semaphorin) 3C (SEMA3C), mRNA [NM_006379]	0.00353656	3.67085
A_23_P342744	LIX1L	NM_153713	Homo sapiens Lix1 homolog (mouse) like (LIX1L), mRNA [NM_153713]	6.88052e-08	3.66968
A_23_P417372	ZSCAN2	NM_017894	Homo sapiens zinc finger and SCAN domain containing 2 (ZSCAN2), transcript variant 2, mRNA [NM_017894]	4.94226e-07	3.66346
A_23_P105963	AK7	NM_152327	Homo sapiens adenylate kinase 7 (AK7), mRNA [NM_152327]	1.92003e-06	3.66173
A_23_P17739	ZNF74	NM_003426	Homo sapiens zinc finger protein 74 (ZNF74), mRNA [NM_003426]	2.79607e-06	3.65487
A_23_P332789	CHRNB4	NM_000750	Homo sapiens cholinergic receptor, nicotinic, beta 4 (CHRNB4), mRNA [NM_000750]	1.83179e-08	3.65398
A_24_P166645	REPIN1	NM_014374	Homo sapiens replication initiator 1 (REPIN1), transcript variant 2, mRNA [NM_014374]	0.000193555	3.65204
A_24_P292964	CDK5RAP3	NM_176095	Homo sapiens CDK5 regulatory subunit associated protein 3 (CDK5RAP3), transcript variant 1, mRNA [NM_176095]	3.35819e-06	3.6505
A_23_P219084	ZNF3	NM_032924	Homo sapiens zinc finger protein 3 (ZNF3), transcript variant 2, mRNA [NM_032924]	0.000385003	3.64712
A_23_P16354	ZNF382	NM_032825	Homo sapiens zinc finger protein 382 (ZNF382), mRNA [NM_032825]	3.13695e-07	3.64456
A_23_P53541	CHD4	NM_001273	Homo sapiens chromodomain helicase DNA binding protein 4 (CHD4), mRNA [NM_001273]	0.00587019	3.6429
A_23_P166135	XRN2	NM_012255	Homo sapiens 5'-3' exoribonuclease 2 (XRN2), mRNA [NM_012255]	0.000111428	3.64098
A_24_P143076	FAM109A	NM_144671	Homo sapiens family with sequence similarity 109, member A (FAM109A), mRNA [NM_144671]	4.10822e-08	3.63776
A_24_P916656	RCP9	NM_014478	Homo sapiens calcitonin gene-related peptide-receptor component protein (RCP9), transcript variant 1, mRNA [NM_014478]	0.00018073	3.63603
A_24_P475349	RAB6B	NM_016577	Homo sapiens RAB6B, member RAS oncogene family (RAB6B), mRNA [NM_016577]	2.16334e-06	3.63582
A_23_P80643	SETMAR	NM_006515	Homo sapiens SET domain and mariner transposase fusion gene (SETMAR), mRNA [NM_006515]	5.47078e-06	3.63449
A_23_P77813	FN3KRP	NM_024619	Homo sapiens fructosamine-3-kinase-related protein (FN3KRP), mRNA [NM_024619]	3.55977e-05	3.62997
A_24_P396702	CASKIN1	NM_020764	Homo sapiens CASK interacting protein 1 (CASKIN1), mRNA [NM_020764]	0.000209241	3.62131
A_23_P207517	PDK2	NM_002611	Homo sapiens pyruvate dehydrogenase kinase, isozyme 2 (PDK2), mRNA [NM_002611]	0.00827882	3.61873
A_24_P933704	PAM	NM_138822	Homo sapiens peptidylglycine alpha-amidating monooxygenase (PAM), transcript variant 4, mRNA [NM_138822]	6.01471e-07	3.61834
A_23_P9677	SEMA4C	NM_017789	Homo sapiens sema domain, immunoglobulin domain (Ig), transmembrane domain (TM) and short cytoplasmic domain, (semaphorin) 4C (SEMA4C), mRNA [NM_017789]	7.17316e-07	3.6121
A_23_P105409	MAP3K12	NM_006301	Homo sapiens mitogen-activated protein kinase kinase kinase 12 (MAP3K12), mRNA [NM_006301]	0.000591423	3.61109
A_23_P80594	PLCL2	NM_015184	Homo sapiens phospholipase C-like 2 (PLCL2), mRNA [NM_015184]	3.75284e-06	3.61052
A_24_P58381	CFL2	NM_021914	Homo sapiens cofilin 2 (muscle) (CFL2), transcript variant 1, mRNA [NM_021914]	0.000600271	3.6105
A_23_P18123	NLGN1	NM_014932	Homo sapiens neuroligin 1 (NLGN1), mRNA [NM_014932]	0.000292339	3.61041
A_23_P8961	IL7	NM_000880	Homo sapiens interleukin 7 (IL7), mRNA [NM_000880]	1.80939e-06	3.61034
A_23_P66432	TTYH2	NM_032646	Homo sapiens tweety homolog 2 (Drosophila) (TTYH2), transcript variant 1, mRNA [NM_032646]	1.95192e-08	3.60591
A_23_P422911	HRK	NM_003806	Homo sapiens harakiri, BCL2 interacting protein (contains only BH3 domain) (HRK), mRNA [NM_003806]	0.00713247	3.60363
A_23_P127915	STK33	NM_030906	Homo sapiens serine/threonine kinase 33 (STK33), mRNA [NM_030906]	5.70876e-05	3.60297
A_23_P252721	DISC1	NM_001012959	Homo sapiens disrupted in schizophrenia 1 (DISC1), transcript variant S, mRNA [NM_001012959]	0.00452814	3.59997
A_23_P116898	A2M	NM_000014	Homo sapiens alpha-2-macroglobulin (A2M), mRNA [NM_000014]	4.64173e-05	3.59923
A_23_P69293	CHDH	AJ272267	Homo sapiens partial mRNA for choline dehydrogenase (chdh gene). [AJ272267]	0.000455685	3.59771
A_24_P125283	HDAC5	NM_001015053	Homo sapiens histone deacetylase 5 (HDAC5), transcript variant 3, mRNA [NM_001015053]	0.000523497	3.58919
A_23_P312179	ALDH5A1	NM_170740	Homo sapiens aldehyde dehydrogenase 5 family, member A1 (succinate-semialdehyde dehydrogenase) (ALDH5A1), nuclear gene encoding mitochondrial protein, transcript variant 1, mRNA [NM_170740]	0.000180197	3.58856
A_23_P158662	GPS1	NM_212492	Homo sapiens G protein pathway suppressor 1 (GPS1), transcript variant 1, mRNA [NM_212492]	1.36494e-07	3.58833
A_24_P279203	GARNL3	AK095679	Homo sapiens cDNA FLJ38360 fis, clone FEBRA2000462, weakly similar to RAP1 GTPASE ACTIVATING PROTEIN 1. [AK095679]	2.25652e-08	3.58729
A_23_P126159	HPCA	NM_002143	Homo sapiens hippocalcin (HPCA), mRNA [NM_002143]	0.000244747	3.58261
A_23_P84762	PARP10	NM_032789	Homo sapiens poly (ADP-ribose) polymerase family, member 10 (PARP10), mRNA [NM_032789]	0.000769182	3.5753
A_24_P927976	KALRN	NM_001024660	Homo sapiens kalirin, RhoGEF kinase (KALRN), transcript variant 1, mRNA [NM_001024660]	1.07014e-06	3.5752
A_32_P79483	LOC283481	BC033993	Homo sapiens hypothetical protein LOC283481, mRNA (cDNA clone IMAGE:5296747). [BC033993]	2.53643e-05	3.57428
A_23_P214638	EHMT2	NM_006709	Homo sapiens euchromatic histone-lysine N-methyltransferase 2 (EHMT2), transcript variant NG36/G9a, mRNA [NM_006709]	0.00758897	3.57338
A_24_P382119	MTL5	NM_001039656	Homo sapiens metallothionein-like 5, testis-specific (tesmin) (MTL5), transcript variant 2, mRNA [NM_001039656]	3.70719e-05	3.57324
A_23_P34744	CTSK	NM_000396	Homo sapiens cathepsin K (pycnodysostosis) (CTSK), mRNA [NM_000396]	0.00140806	3.57111
A_23_P208937	TLE6	NM_024760	Homo sapiens transducin-like enhancer of split 6 (E(sp1) homolog, Drosophila) (TLE6), mRNA [NM_024760]	0.000823717	3.56938
A_23_P92410	CASP3	NM_004346	Homo sapiens caspase 3, apoptosis-related cysteine peptidase (CASP3), transcript variant alpha, mRNA [NM_004346]	3.36313e-06	3.56921
A_23_P253958	LRRC17	NM_005824	Homo sapiens leucine rich repeat containing 17 (LRRC17), transcript variant 2, mRNA [NM_005824]	7.55861e-11	3.56254
A_24_P16610	ZNRF1	NM_032268	Homo sapiens zinc and ring finger 1 (ZNRF1), mRNA [NM_032268]	0.00199224	3.56059
A_23_P152420	KIAA0182	NM_014615	Homo sapiens KIAA0182 (KIAA0182), mRNA [NM_014615]	0.00177896	3.55668
A_23_P77440	NFATC3	NM_173164	Homo sapiens nuclear factor of activated T-cells, cytoplasmic, calcineurin-dependent 3 (NFATC3), transcript variant 4, mRNA [NM_173164]	0.000113643	3.55519
A_23_P105002	ROM1	NM_000327	Homo sapiens retinal outer segment membrane protein 1 (ROM1), mRNA [NM_000327]	3.21343e-05	3.54669
A_23_P145507	EYA4	NM_004100	Homo sapiens eyes absent homolog 4 (Drosophila) (EYA4), transcript variant 1, mRNA [NM_004100]	0.000165515	3.54599
A_23_P131887	SOX12	U35612	Homo sapiens SOX22 protein (SOX22) mRNA, complete cds. [U35612]	5.47478e-06	3.5439
A_24_P13083	TSPAN18	NM_130783	Homo sapiens tetraspanin 18 (TSPAN18), transcript variant 2, mRNA [NM_130783]	0.000144612	3.54357
A_23_P201319	DISP1	NM_032890	Homo sapiens dispatched homolog 1 (Drosophila) (DISP1), mRNA [NM_032890]	4.18012e-05	3.54143
A_32_P103291	SMYD3	NM_022743	Homo sapiens SET and MYND domain containing 3 (SMYD3), mRNA [NM_022743]	0.00735451	3.54105
A_24_P215445	PHOX2A	NM_005169	Homo sapiens paired-like (aristaless) homeobox 2a (PHOX2A), mRNA [NM_005169]	2.08643e-05	3.53985
A_23_P367026	ABHD12	NM_015600	Homo sapiens abhydrolase domain containing 12 (ABHD12), transcript variant 2, mRNA [NM_015600]	3.63525e-05	3.52935
A_24_P365365	TCF3	NM_003200	Homo sapiens transcription factor 3 (E2A immunoglobulin enhancer binding factors E12/E47) (TCF3), mRNA [NM_003200]	0.000278746	3.52864
A_23_P100001	LOC400451	NM_207446	Homo sapiens hypothetical gene supported by AK075564; BC060873 (LOC400451), mRNA [NM_207446]	1.65296e-05	3.52681
A_24_P109417	C1orf187	NM_198545	Homo sapiens chromosome 1 open reading frame 187 (C1orf187), mRNA [NM_198545]	7.98543e-09	3.525
A_23_P345692	IL17D	NM_138284	Homo sapiens interleukin 17D (IL17D), mRNA [NM_138284]	2.35249e-06	3.5243
A_23_P54064	METTL3	NM_019852	Homo sapiens methyltransferase like 3 (METTL3), mRNA [NM_019852]	0.00422126	3.52254
A_24_P373152	CFI	NM_000204	Homo sapiens complement factor I (CFI), mRNA [NM_000204]	0.00541652	3.51817
A_24_P251962	PCDHB2	NM_018936	Homo sapiens protocadherin beta 2 (PCDHB2), mRNA [NM_018936]	0.000991758	3.51762
A_23_P129174	LRRC49	NM_017691	Homo sapiens leucine rich repeat containing 49 (LRRC49), mRNA [NM_017691]	1.15725e-06	3.51248
A_23_P354805	KIRREL2	NM_032123	Homo sapiens kin of IRRE like 2 (Drosophila) (KIRREL2), transcript variant 1, mRNA [NM_032123]	7.7303e-06	3.50807
A_23_P111888	CTHRC1	NM_138455	Homo sapiens collagen triple helix repeat containing 1 (CTHRC1), mRNA [NM_138455]	0.00674984	3.50539
A_23_P5460	FEV	NM_017521	Homo sapiens FEV (ETS oncogene family) (FEV), mRNA [NM_017521]	0.00986114	3.50108
A_23_P215577	HDAC4	NM_006037	Homo sapiens histone deacetylase 4 (HDAC4), mRNA [NM_006037]	1.70842e-06	3.49971
A_23_P8848	RC74	NM_018250	Homo sapiens integrator complex subunit 9 (RC74), mRNA [NM_018250]	3.88542e-07	3.49951
A_24_P162911	PRKD3	BC030706	Homo sapiens protein kinase D3, mRNA (cDNA clone MGC:33062 IMAGE:5266769), complete cds. [BC030706]	0.00024013	3.49311
A_23_P132027	SPAG4	NM_003116	Homo sapiens sperm associated antigen 4 (SPAG4), mRNA [NM_003116]	8.51501e-06	3.49284
A_24_P240187	LRRN1	NM_020873	Homo sapiens leucine rich repeat neuronal 1 (LRRN1), mRNA [NM_020873]	2.73018e-07	3.49191
A_23_P253451	SLC7A14	NM_020949	Homo sapiens solute carrier family 7 (cationic amino acid transporter, y+ system), member 14 (SLC7A14), mRNA [NM_020949]	2.11998e-07	3.49147
A_23_P59613	FZD9	NM_003508	Homo sapiens frizzled homolog 9 (Drosophila) (FZD9), mRNA [NM_003508]	1.82482e-07	3.48944
A_24_P222397	C1orf114	NM_021179	Homo sapiens chromosome 1 open reading frame 114 (C1orf114), mRNA [NM_021179]	0.00362134	3.48818
A_23_P125748	ZMAT1	NM_032441	Homo sapiens zinc finger, matrin type 1 (ZMAT1), transcript variant 3, mRNA [NM_032441]	0.000108154	3.48085
A_23_P69267	ABHD14A	NM_015407	Homo sapiens abhydrolase domain containing 14A (ABHD14A), mRNA [NM_015407]	0.000298535	3.48031
A_23_P112341	RMI1	NM_024945	Homo sapiens RMI1, RecQ mediated genome instability 1, homolog (S. cerevisiae) (RMI1), mRNA [NM_024945]	0.00129408	3.47975
A_23_P204246	PHC1	NM_004426	Homo sapiens polyhomeotic-like 1 (Drosophila) (PHC1), mRNA [NM_004426]	5.72264e-08	3.4772
A_23_P116037	TM7SF2	NM_003273	Homo sapiens transmembrane 7 superfamily member 2 (TM7SF2), mRNA [NM_003273]	0.000225003	3.4768
A_23_P131626	ASCC3L1	NM_014014	Homo sapiens activating signal cointegrator 1 complex subunit 3-like 1 (ASCC3L1), mRNA [NM_014014]	6.59983e-06	3.47171
A_23_P114952	TMEM9	NM_016456	Homo sapiens transmembrane protein 9 (TMEM9), mRNA [NM_016456]	2.78707e-06	3.46694
A_32_P8156	C10orf107	NM_173554	Homo sapiens chromosome 10 open reading frame 107 (C10orf107), mRNA [NM_173554]	9.13821e-09	3.46468
A_23_P83599	PRKAR1B	NM_002735	Homo sapiens protein kinase, cAMP-dependent, regulatory, type I, beta (PRKAR1B), mRNA [NM_002735]	7.64296e-05	3.4615
A_23_P82738	RAD54B	NM_012415	Homo sapiens RAD54 homolog B (S. cerevisiae) (RAD54B), mRNA [NM_012415]	0.00301825	3.4606
A_23_P365738	ARC	NM_015193	Homo sapiens activity-regulated cytoskeleton-associated protein (ARC), mRNA [NM_015193]	1.64534e-06	3.4587
A_24_P161036	ACOT2	NM_006821	Homo sapiens acyl-CoA thioesterase 2 (ACOT2), mRNA [NM_006821]	7.98772e-05	3.45763
A_32_P207180	ARL16	NM_001040025	Homo sapiens ADP-ribosylation factor-like 16 (ARL16), mRNA [NM_001040025]	4.56283e-06	3.45085
A_23_P74887	SDC3	AB007937	Homo sapiens mRNA for KIAA0468 protein, partial cds. [AB007937]	0.00321718	3.45058
A_23_P376591	CLDN5	NM_003277	Homo sapiens claudin 5 (transmembrane protein deleted in velocardiofacial syndrome) (CLDN5), mRNA [NM_003277]	0.00754756	3.44905
A_32_P51084	NUP205	NM_015135	Homo sapiens nucleoporin 205kDa (NUP205), mRNA [NM_015135]	0.00462068	3.44893
A_24_P299911	PASK	AL117400	Homo sapiens mRNA; cDNA DKFZp434O051 (from clone DKFZp434O051). [AL117400]	0.000521426	3.44876
A_24_P248053	TOP1MT	NM_052963	Homo sapiens topoisomerase (DNA) I, mitochondrial (TOP1MT), nuclear gene encoding mitochondrial protein, mRNA [NM_052963]	0.000347442	3.44427
A_23_P411953	PYGO2	NM_138300	Homo sapiens pygopus homolog 2 (Drosophila) (PYGO2), mRNA [NM_138300]	4.52184e-09	3.44371
A_24_P71661	CRTAP	NM_006371	Homo sapiens cartilage associated protein (CRTAP), mRNA [NM_006371]	2.58254e-07	3.44274
A_24_P42624	UNC5C	NM_003728	Homo sapiens unc-5 homolog C (C. elegans) (UNC5C), mRNA [NM_003728]	2.03471e-05	3.43994
A_24_P219378	CARD9	BC070091	Homo sapiens caspase recruitment domain family, member 9, mRNA (cDNA clone MGC:87491 IMAGE:30343821), complete cds. [BC070091]	0.00300833	3.43613
A_23_P256021	LAS1L	NM_031206	Homo sapiens LAS1-like (S. cerevisiae) (LAS1L), mRNA [NM_031206]	0.000432142	3.43029
A_23_P31055	NUP43	NM_198887	Homo sapiens nucleoporin 43kDa (NUP43), transcript variant 1, mRNA [NM_198887]	0.00247293	3.42952
A_24_P371670	HNRPA0	NM_006805	Homo sapiens heterogeneous nuclear ribonucleoprotein A0 (HNRPA0), mRNA [NM_006805]	0.00620733	3.4267
A_23_P18649	FAT4	AK026709	Homo sapiens cDNA: FLJ23056 fis, clone LNG03287. [AK026709]	8.72201e-05	3.42514
A_23_P93282	HIST1H3J	NM_003535	Homo sapiens histone 1, H3j (HIST1H3J), mRNA [NM_003535]	2.16854e-05	3.42294
A_23_P96285	REEP1	NM_022912	Homo sapiens receptor accessory protein 1 (REEP1), mRNA [NM_022912]	2.61266e-10	3.42187
A_23_P139486	CDK2AP1	NM_004642	Homo sapiens CDK2-associated protein 1 (CDK2AP1), mRNA [NM_004642]	7.3382e-06	3.42011
A_23_P405175	C1orf21	NM_030806	Homo sapiens chromosome 1 open reading frame 21 (C1orf21), mRNA [NM_030806]	2.49752e-06	3.41969
A_23_P151634	SUPT16H	NM_007192	Homo sapiens suppressor of Ty 16 homolog (S. cerevisiae) (SUPT16H), mRNA [NM_007192]	1.04098e-05	3.41108
A_23_P131139	DIRC1	NM_052952	Homo sapiens disrupted in renal carcinoma 1 (DIRC1), mRNA [NM_052952]	1.8e-07	3.41015
A_23_P12336	PRMT6	NM_018137	Homo sapiens protein arginine methyltransferase 6 (PRMT6), mRNA [NM_018137]	1.91956e-06	3.40634
A_32_P212886	TBXAS1	NM_030984	Homo sapiens thromboxane A synthase 1 (platelet, cytochrome P450, family 5, subfamily A) (TBXAS1), transcript variant TXS-II, mRNA [NM_030984]	0.00202725	3.40435
A_23_P205553	SYNE2	NM_182910	Homo sapiens spectrin repeat containing, nuclear envelope 2 (SYNE2), transcript variant 2, mRNA [NM_182910]	0.000185226	3.40422
A_24_P373286	COL6A1	NM_001848	Homo sapiens collagen, type VI, alpha 1 (COL6A1), mRNA [NM_001848]	2.88682e-06	3.4013
A_24_P384397	RAVER1	NM_133452	Homo sapiens ribonucleoprotein, PTB-binding 1 (RAVER1), mRNA [NM_133452]	0.00292662	3.39814
A_23_P23151	CDON	NM_016952	Homo sapiens Cdon homolog (mouse) (CDON), mRNA [NM_016952]	3.18711e-05	3.39378
A_23_P147495	BCORL1	NM_021946	Homo sapiens BCL6 co-repressor-like 1 (BCORL1), mRNA [NM_021946]	0.00307723	3.39372
A_23_P61919	DBF4	NM_006716	Homo sapiens DBF4 homolog (S. cerevisiae) (DBF4), mRNA [NM_006716]	4.27216e-08	3.39137
A_23_P113405	CNNM3	NM_017623	Homo sapiens cyclin M3 (CNNM3), transcript variant 1, mRNA [NM_017623]	1.13846e-05	3.39128
A_23_P103601	LYPD1	NM_144586	Homo sapiens LY6/PLAUR domain containing 1 (LYPD1), mRNA [NM_144586]	0.00176252	3.3902
A_23_P110882	TSPYL4	NM_021648	Homo sapiens TSPY-like 4 (TSPYL4), mRNA [NM_021648]	3.60275e-06	3.38792
A_23_P325093	GAS8	NM_001481	Homo sapiens growth arrest-specific 8 (GAS8), mRNA [NM_001481]	0.00745056	3.38732
A_24_P273726	MSRB3	NM_198080	Homo sapiens methionine sulfoxide reductase B3 (MSRB3), transcript variant 1, mRNA [NM_198080]	2.59325e-05	3.38672
A_32_P160254	DKFZP434I0714	XM_929673	PREDICTED: Homo sapiens hypothetical protein DKFZP434I0714 (DKFZP434I0714), mRNA [XM_929673]	0.000809371	3.37986
A_23_P308924	DTX3	NM_178502	Homo sapiens deltex 3 homolog (Drosophila) (DTX3), mRNA [NM_178502]	3.14879e-05	3.37879
A_24_P382001	POLR3K	NM_016310	Homo sapiens polymerase (RNA) III (DNA directed) polypeptide K, 12.3 kDa (POLR3K), mRNA [NM_016310]	0.000475042	3.37741
A_24_P230074	ZNF704	NM_001033723	Homo sapiens zinc finger protein 704 (ZNF704), mRNA [NM_001033723]	6.2572e-09	3.37166
A_24_P262355	PHB	NM_002634	Homo sapiens prohibitin (PHB), mRNA [NM_002634]	0.000598937	3.37144
A_24_P14260	CACNA1G	NM_198397	Homo sapiens calcium channel, voltage-dependent, alpha 1G subunit (CACNA1G), transcript variant 15, mRNA [NM_198397]	2.51249e-08	3.37077
A_23_P37988	CPNE2	NM_152727	Homo sapiens copine II (CPNE2), mRNA [NM_152727]	9.16828e-06	3.37007
A_23_P214281	PAQR8	NM_133367	Homo sapiens progestin and adipoQ receptor family member VIII (PAQR8), mRNA [NM_133367]	0.00184946	3.36792
A_23_P70219	TLX3	NM_021025	Homo sapiens T-cell leukemia homeobox 3 (TLX3), mRNA [NM_021025]	1.24149e-07	3.36674
A_32_P194025	FAM104B	BC006406	Homo sapiens family with sequence similarity 104, member B, mRNA (cDNA clone IMAGE:3939163), partial cds. [BC006406]	2.59584e-05	3.36293
A_23_P20427	RHOBTB2	NM_015178	Homo sapiens Rho-related BTB domain containing 2 (RHOBTB2), mRNA [NM_015178]	0.000741917	3.36256
A_24_P101314	SHF	NM_138356	Homo sapiens Src homology 2 domain containing F (SHF), mRNA [NM_138356]	0.000233247	3.36235
A_23_P53646	NAP1L1	NM_139207	Homo sapiens nucleosome assembly protein 1-like 1 (NAP1L1), transcript variant 1, mRNA [NM_139207]	0.000996825	3.36215
A_23_P346309	B4GALT6	NM_004775	Homo sapiens UDP-Gal:betaGlcNAc beta 1,4- galactosyltransferase, polypeptide 6 (B4GALT6), mRNA [NM_004775]	0.00201477	3.36158
A_23_P68868	TUG1	NR_002323	Homo sapiens taurine upregulated gene 1 (TUG1) on chromosome 22 [NR_002323]	5.3913e-05	3.3609
A_23_P161507	MKRN3	NM_005664	Homo sapiens makorin, ring finger protein, 3 (MKRN3), mRNA [NM_005664]	3.76522e-05	3.3593
A_23_P154786	MAP1LC3A	NM_032514	Homo sapiens microtubule-associated protein 1 light chain 3 alpha (MAP1LC3A), transcript variant 1, mRNA [NM_032514]	7.04795e-05	3.35729
A_32_P89073	SAMD1	NM_138352	Homo sapiens sterile alpha motif domain containing 1 (SAMD1), mRNA [NM_138352]	0.00349346	3.35583
A_23_P111724	RPIB9	NM_138290	Homo sapiens Rap2-binding protein 9 (RPIB9), mRNA [NM_138290]	3.21737e-06	3.35444
A_23_P432947	GREM1	NM_013372	Homo sapiens gremlin 1, cysteine knot superfamily, homolog (Xenopus laevis) (GREM1), mRNA [NM_013372]	6.86116e-08	3.3544
A_23_P131754	C20orf195	NM_024059	Homo sapiens chromosome 20 open reading frame 195 (C20orf195), mRNA [NM_024059]	0.000212947	3.35367
A_23_P37484	CHSY1	NM_014918	Homo sapiens carbohydrate (chondroitin) synthase 1 (CHSY1), mRNA [NM_014918]	6.66642e-05	3.3493
A_23_P31584	RABL5	NM_022777	Homo sapiens RAB, member RAS oncogene family-like 5 (RABL5), mRNA [NM_022777]	0.000119119	3.34838
A_23_P423331	NTNG2	NM_032536	Homo sapiens netrin G2 (NTNG2), mRNA [NM_032536]	1.99008e-06	3.34453
A_24_P307498	ANKRD45	NM_198493	Homo sapiens ankyrin repeat domain 45 (ANKRD45), mRNA [NM_198493]	1.95598e-05	3.34152
A_24_P230649	C3orf15	NM_033364	Homo sapiens chromosome 3 open reading frame 15 (C3orf15), mRNA [NM_033364]	4.15037e-09	3.34079
A_23_P352950	PNMA5	NM_052926	Homo sapiens paraneoplastic antigen like 5 (PNMA5), mRNA [NM_052926]	1.07158e-09	3.33979
A_23_P215088	ZC3HC1	NM_016478	Homo sapiens zinc finger, C3HC-type containing 1 (ZC3HC1), mRNA [NM_016478]	1.62777e-07	3.33882
A_23_P23855	POLR3GL	NM_032305	Homo sapiens polymerase (RNA) III (DNA directed) polypeptide G (32kD) like (POLR3GL), mRNA [NM_032305]	0.00082783	3.3372
A_23_P64743	STK38L	NM_015000	Homo sapiens serine/threonine kinase 38 like (STK38L), mRNA [NM_015000]	2.51969e-05	3.33683
A_23_P126393	SETDB1	NM_012432	Homo sapiens SET domain, bifurcated 1 (SETDB1), mRNA [NM_012432]	5.56561e-05	3.32848
A_23_P356731	FLJ31568	NM_152509	Homo sapiens FLJ31568 protein (FLJ31568), mRNA [NM_152509]	1.29232e-10	3.32842
A_23_P59426	PAXIP1	NM_007349	Homo sapiens PAX interacting (with transcription-activation domain) protein 1 (PAXIP1), mRNA [NM_007349]	0.00122498	3.32802
A_23_P121095	TOP2B	NM_001068	Homo sapiens topoisomerase (DNA) II beta 180kDa (TOP2B), mRNA [NM_001068]	2.15889e-05	3.32682
A_23_P166807	PCBP4	NM_033010	Homo sapiens poly(rC) binding protein 4 (PCBP4), transcript variant 4, mRNA [NM_033010]	0.000126529	3.32664
A_23_P59507	SH2B2	NM_020979	Homo sapiens SH2B adaptor protein 2 (SH2B2), mRNA [NM_020979]	5.34276e-06	3.31971
A_32_P218636	LOC389634	NM_001012988	Homo sapiens hypothetical LOC389634 (LOC389634), mRNA [NM_001012988]	0.00012325	3.31817
A_32_P84388	GGTL3	AK124788	Homo sapiens cDNA FLJ42798 fis, clone BRAWH3008931. [AK124788]	0.000786069	3.31811
A_23_P218317	NARF	NM_012336	Homo sapiens nuclear prelamin A recognition factor (NARF), transcript variant 1, mRNA [NM_012336]	3.18221e-05	3.31763
A_23_P13554	ALG8	NM_001007027	Homo sapiens asparagine-linked glycosylation 8 homolog (S. cerevisiae, alpha-1,3-glucosyltransferase) (ALG8), transcript variant 2, mRNA [NM_001007027]	0.00840365	3.31694
A_24_P116700	LOC388335	NM_001004313	Homo sapiens similar to RIKEN cDNA A730055C05 gene (LOC388335), mRNA [NM_001004313]	5.68917e-07	3.31505
A_23_P371966	KIAA1908	AB067495	Homo sapiens mRNA for KIAA1908 protein, partial cds. [AB067495]	7.98862e-05	3.3138
A_32_P98683	MLLT6	AL832481	Homo sapiens mRNA; cDNA DKFZp686J1719 (from clone DKFZp686J1719). [AL832481]	2.02684e-05	3.31187
A_23_P21436	PHF19	NM_015651	Homo sapiens PHD finger protein 19 (PHF19), transcript variant 1, mRNA [NM_015651]	0.00219414	3.31071
A_32_P5057	LOC284244	AF070541	Homo sapiens clones 24714 and 24715 mRNA sequence. [AF070541]	1.77766e-06	3.30786
A_32_P61298	CDR1	AK054921	Homo sapiens cDNA FLJ30359 fis, clone BRACE2007760, highly similar to 40S RIBOSOMAL PROTEIN S15A. [AK054921]	9.97234e-08	3.30539
A_24_P150160	FADS2	NM_004265	Homo sapiens fatty acid desaturase 2 (FADS2), mRNA [NM_004265]	8.17633e-05	3.30477
A_23_P133438	FAM105A	NM_019018	Homo sapiens family with sequence similarity 105, member A (FAM105A), mRNA [NM_019018]	0.00336203	3.30474
A_24_P396660	GSTM4	NM_147148	Homo sapiens glutathione S-transferase M4 (GSTM4), transcript variant 2, mRNA [NM_147148]	2.79664e-07	3.30385
A_23_P28834	PHACTR3	NM_080672	Homo sapiens phosphatase and actin regulator 3 (PHACTR3), transcript variant 1, mRNA [NM_080672]	7.20779e-07	3.30206
A_23_P113161	C14orf139	BC008299	Homo sapiens chromosome 14 open reading frame 139, mRNA (cDNA clone MGC:14946 IMAGE:3532035), complete cds. [BC008299]	4.92399e-06	3.29847
A_23_P121215	CAMK1	NM_003656	Homo sapiens calcium/calmodulin-dependent protein kinase I (CAMK1), mRNA [NM_003656]	0.00156703	3.29808
A_24_P921554	FLJ44894	BC017970	Homo sapiens similar to zinc finger protein 91, mRNA (cDNA clone IMAGE:4673448), partial cds. [BC017970]	3.65234e-06	3.29691
A_23_P19455	MDC1	NM_014641	Homo sapiens mediator of DNA damage checkpoint 1 (MDC1), mRNA [NM_014641]	5.98512e-06	3.29682
A_32_P133840	TMCC2	NM_014858	Homo sapiens transmembrane and coiled-coil domain family 2 (TMCC2), mRNA [NM_014858]	0.000403672	3.29674
A_23_P23728	SV2A	NM_014849	Homo sapiens synaptic vesicle glycoprotein 2A (SV2A), mRNA [NM_014849]	0.000854916	3.29342
A_23_P6321	CKB	NM_001823	Homo sapiens creatine kinase, brain (CKB), mRNA [NM_001823]	5.08602e-06	3.28904
A_23_P123112	ABCB4	NM_018850	Homo sapiens ATP-binding cassette, sub-family B (MDR/TAP), member 4 (ABCB4), transcript variant C, mRNA [NM_018850]	2.07826e-07	3.28857
A_23_P76015	ARHGAP19	NM_032900	Homo sapiens Rho GTPase activating protein 19 (ARHGAP19), mRNA [NM_032900]	0.000466126	3.28203
A_23_P92903	C1QTNF2	NM_031908	Homo sapiens C1q and tumor necrosis factor related protein 2 (C1QTNF2), mRNA [NM_031908]	0.000298286	3.2797
A_32_P86118	ACY1L2	NM_001010853	Homo sapiens aminoacylase 1-like 2 (ACY1L2), mRNA [NM_001010853]	0.000170826	3.27872
A_23_P310956	COL6A2	NM_058175	Homo sapiens collagen, type VI, alpha 2 (COL6A2), transcript variant 2C2a', mRNA [NM_058175]	1.55447e-06	3.27857
A_23_P204980	UGCGL2	NM_020121	Homo sapiens UDP-glucose ceramide glucosyltransferase-like 2 (UGCGL2), mRNA [NM_020121]	0.000169819	3.27778
A_23_P160582	HYI	NM_031207	Homo sapiens hydroxypyruvate isomerase homolog (E. coli) (HYI), mRNA [NM_031207]	1.03802e-06	3.27602
A_23_P314250	FAM43B	NM_207334	Homo sapiens family with sequence similarity 43, member B (FAM43B), mRNA [NM_207334]	0.000276217	3.27092
A_23_P135357	RNMTL1	NM_018146	Homo sapiens RNA methyltransferase like 1 (RNMTL1), mRNA [NM_018146]	0.000111853	3.27018
A_24_P348660	ATRNL1	NM_207303	Homo sapiens attractin-like 1 (ATRNL1), mRNA [NM_207303]	1.06936e-07	3.26861
A_23_P55091	FTSJ3	NM_017647	Homo sapiens FtsJ homolog 3 (E. coli) (FTSJ3), mRNA [NM_017647]	0.000145643	3.26119
A_23_P371107	D4S234E	NM_014392	Homo sapiens DNA segment on chromosome 4 (unique) 234 expressed sequence (D4S234E), transcript variant 1, mRNA [NM_014392]	0.00499591	3.26092
A_23_P106322	CPEB1	NM_030594	Homo sapiens cytoplasmic polyadenylation element binding protein 1 (CPEB1), mRNA [NM_030594]	8.34103e-07	3.25602
A_23_P391228	MANEAL	NM_152496	Homo sapiens mannosidase, endo-alpha-like (MANEAL), transcript variant 2, mRNA [NM_152496]	0.000443478	3.25554
A_32_P181297	ST7OT1	NR_002330	Homo sapiens ST7 overlapping transcript 1 (antisense non-coding RNA) (ST7OT1) on chromosome 7 [NR_002330]	2.85775e-05	3.25441
A_23_P99985	HERPUD2	NM_022373	Homo sapiens HERPUD family member 2 (HERPUD2), mRNA [NM_022373]	0.000279422	3.25307
A_23_P162355	HOXC5	NM_018953	Homo sapiens homeobox C5 (HOXC5), transcript variant 1, mRNA [NM_018953]	9.3082e-08	3.25062
A_24_P203072	PHF16	NM_014735	Homo sapiens PHD finger protein 16 (PHF16), mRNA [NM_014735]	7.62574e-08	3.25051
A_23_P217704	GYG2	NM_003918	Homo sapiens glycogenin 2 (GYG2), mRNA [NM_003918]	0.000205346	3.2497
A_23_P326893	MGC20983	NM_145045	Homo sapiens hypothetical protein MGC20983 (MGC20983), mRNA [NM_145045]	1.3142e-07	3.24205
A_23_P34827	HCN3	NM_020897	Homo sapiens hyperpolarization activated cyclic nucleotide-gated potassium channel 3 (HCN3), mRNA [NM_020897]	0.000850562	3.23637
A_32_P176819	CLYBL	NM_138280	Homo sapiens citrate lyase beta like (CLYBL), transcript variant 1, mRNA [NM_138280]	0.000272895	3.23588
A_32_P180315	KIAA1529	NM_020893	Homo sapiens KIAA1529 (KIAA1529), mRNA [NM_020893]	5.72861e-07	3.23223
A_23_P213255	SMARCAD1	NM_020159	Homo sapiens SWI/SNF-related, matrix-associated actin-dependent regulator of chromatin, subfamily a, containing DEAD/H box 1 (SMARCAD1), mRNA [NM_020159]	2.30289e-06	3.23151
A_23_P3527	POLR2C	NM_032940	Homo sapiens polymerase (RNA) II (DNA directed) polypeptide C, 33kDa (POLR2C), mRNA [NM_032940]	0.00135477	3.23074
A_23_P411833	WDR90	NM_145294	Homo sapiens WD repeat domain 90 (WDR90), mRNA [NM_145294]	0.00876323	3.22915
A_23_P136460	C21orf58	NM_199071	Homo sapiens chromosome 21 open reading frame 58 (C21orf58), transcript variant 2, mRNA [NM_199071]	0.000360297	3.22372
A_23_P110412	FLJ12993	AK023055	Homo sapiens cDNA FLJ12993 fis, clone NT2RP3000197. [AK023055]	1.24031e-05	3.22303
A_32_P148914	LOC285398	AK098811	Homo sapiens cDNA FLJ25945 fis, clone JTH12731. [AK098811]	5.22227e-07	3.22008
A_23_P380881	ANKRD13B	NM_152345	Homo sapiens ankyrin repeat domain 13B (ANKRD13B), mRNA [NM_152345]	4.49018e-05	3.21825
A_23_P79066	SPPL2B	NM_152988	Homo sapiens signal peptide peptidase-like 2B (SPPL2B), transcript variant 2, mRNA [NM_152988]	0.00431415	3.21564
A_32_P40615	HDAC9	NM_178423	Homo sapiens histone deacetylase 9 (HDAC9), transcript variant 4, mRNA [NM_178423]	0.00104496	3.21311
A_24_P279060	HCN4	NM_005477	Homo sapiens hyperpolarization activated cyclic nucleotide-gated potassium channel 4 (HCN4), mRNA [NM_005477]	0.00926284	3.20766
A_23_P414913	C9orf19	NM_022343	Homo sapiens chromosome 9 open reading frame 19 (C9orf19), mRNA [NM_022343]	0.00642371	3.20539
A_32_P206293	HCG12	NR_002831	Homo sapiens HLA complex group 12 (HCG12) on chromosome 6 [NR_002831]	1.78024e-08	3.20268
A_24_P341538	USP51	NM_201286	Homo sapiens ubiquitin specific peptidase 51 (USP51), mRNA [NM_201286]	6.75454e-06	3.20196
A_24_P124558	HOXC10	NM_017409	Homo sapiens homeobox C10 (HOXC10), mRNA [NM_017409]	2.71439e-06	3.20157
A_23_P28953	DNMT3B	NM_175850	Homo sapiens DNA (cytosine-5-)-methyltransferase 3 beta (DNMT3B), transcript variant 6, mRNA [NM_175850]	0.00069551	3.19903
A_24_P7121	NRSN2	NM_024958	Homo sapiens neurensin 2 (NRSN2), mRNA [NM_024958]	0.000175486	3.1983
A_23_P77079	MYEF2	NM_016132	Homo sapiens myelin expression factor 2 (MYEF2), mRNA [NM_016132]	0.00103447	3.19654
A_23_P319270	ATRX	BC002521	Homo sapiens alpha thalassemia/mental retardation syndrome X-linked (RAD54 homolog, S. cerevisiae), mRNA (cDNA clone IMAGE:3139907), complete cds. [BC002521]	0.00448303	3.19351
A_23_P45185	FIGF	NM_004469	Homo sapiens c-fos induced growth factor (vascular endothelial growth factor D) (FIGF), mRNA [NM_004469]	2.18153e-06	3.18951
A_23_P255331	OSAP	NM_032623	Homo sapiens ovary-specific acidic protein (OSAP), mRNA [NM_032623]	5.16455e-08	3.18838
A_23_P138631	SMC3	NM_005445	Homo sapiens structural maintenance of chromosomes 3 (SMC3), mRNA [NM_005445]	9.81665e-08	3.18802
A_23_P164826	RNASEH2A	NM_006397	Homo sapiens ribonuclease H2, large subunit (RNASEH2A), mRNA [NM_006397]	0.00773737	3.18624
A_24_P244442	BSCL2	NM_032667	Homo sapiens Bernardinelli-Seip congenital lipodystrophy 2 (seipin) (BSCL2), mRNA [NM_032667]	2.56686e-06	3.18579
A_32_P100258	FLJ37453	AK094772	Homo sapiens cDNA FLJ37453 fis, clone BRAWH2010754. [AK094772]	0.000527059	3.18497
A_23_P32805	GREB1	NM_148903	Homo sapiens GREB1 protein (GREB1), transcript variant c, mRNA [NM_148903]	2.19459e-07	3.18272
A_23_P405267	CDH24	AK057922	Homo sapiens cDNA FLJ25193 fis, clone JTH00761. [AK057922]	0.00071432	3.18175
A_23_P124132	FLJ22222	NM_024648	Homo sapiens hypothetical protein FLJ22222 (FLJ22222), transcript variant 1, mRNA [NM_024648]	1.22957e-05	3.18105
A_24_P350437	THAP2	NM_031435	Homo sapiens THAP domain containing, apoptosis associated protein 2 (THAP2), mRNA [NM_031435]	1.1845e-05	3.17517
A_32_P122268	SYT15	AK131036	Homo sapiens cDNA FLJ29001 fis, clone CBL08678. [AK131036]	7.49944e-06	3.17473
A_24_P479551	FLJ25076	AB188494	Homo sapiens mRNA, clone: TH049G03. [AB188494]	1.23106e-07	3.17252
A_23_P126689	USP21	NM_012475	Homo sapiens ubiquitin specific peptidase 21 (USP21), transcript variant 1, mRNA [NM_012475]	2.03034e-06	3.17149
A_23_P57927	HYAL2	NM_003773	Homo sapiens hyaluronoglucosaminidase 2 (HYAL2), transcript variant 1, mRNA [NM_003773]	0.000103062	3.17082
A_24_P722216	DHTKD1	NM_018706	Homo sapiens dehydrogenase E1 and transketolase domain containing 1 (DHTKD1), mRNA [NM_018706]	0.000922604	3.1655
A_24_P274795	CDCA7L	NM_018719	Homo sapiens cell division cycle associated 7-like (CDCA7L), mRNA [NM_018719]	0.00503424	3.16105
A_24_P146138	PCDHA1	NM_031410	Homo sapiens protocadherin alpha 1 (PCDHA1), transcript variant 2, mRNA [NM_031410]	1.7183e-05	3.16027
A_24_P15640	C19orf31	NM_001014373	Homo sapiens chromosome 19 open reading frame 31 (C19orf31), mRNA [NM_001014373]	0.00210112	3.15902
A_24_P808534	DHX9	NM_001357	Homo sapiens DEAH (Asp-Glu-Ala-His) box polypeptide 9 (DHX9), mRNA [NM_001357]	0.000309211	3.15641
A_24_P38143	AHI1	NM_017651	Homo sapiens Abelson helper integration site 1 (AHI1), mRNA [NM_017651]	1.66656e-06	3.15559
A_32_P159150	CHCHD3	NM_017812	Homo sapiens coiled-coil-helix-coiled-coil-helix domain containing 3 (CHCHD3), mRNA [NM_017812]	0.000115711	3.15324
A_24_P365901	TSPAN33	NM_178562	Homo sapiens tetraspanin 33 (TSPAN33), mRNA [NM_178562]	9.62737e-06	3.1496
A_24_P298077	ANGPT1	NM_001146	Homo sapiens angiopoietin 1 (ANGPT1), mRNA [NM_001146]	0.00204629	3.14767
A_23_P20823	WDR34	NM_052844	Homo sapiens WD repeat domain 34 (WDR34), mRNA [NM_052844]	0.00367853	3.14752
A_23_P121037	PODXL2	NM_015720	Homo sapiens podocalyxin-like 2 (PODXL2), mRNA [NM_015720]	0.00288543	3.14742
A_23_P253692	GPR64	NM_005756	Homo sapiens G protein-coupled receptor 64 (GPR64), mRNA [NM_005756]	5.07368e-06	3.1457
A_23_P415633	FLJ25006	NM_144610	Homo sapiens hypothetical protein FLJ25006 (FLJ25006), mRNA [NM_144610]	8.55087e-05	3.14463
A_23_P210253	DGKD	NM_152879	Homo sapiens diacylglycerol kinase, delta 130kDa (DGKD), transcript variant 2, mRNA [NM_152879]	5.17714e-05	3.14315
A_23_P152583	FLJ21865	NM_022759	Homo sapiens endo-beta-N-acetylglucosaminidase (FLJ21865), mRNA [NM_022759]	0.00137036	3.14314
A_23_P430140	PRO0478	AF090930	Homo sapiens clone HQ0478 PRO0478 mRNA, complete cds. [AF090930]	0.00186934	3.14226
A_23_P107394	HES7	NM_032580	Homo sapiens hairy and enhancer of split 7 (Drosophila) (HES7), mRNA [NM_032580]	0.00192644	3.14069
A_23_P301360	ZNF572	NM_152412	Homo sapiens zinc finger protein 572 (ZNF572), mRNA [NM_152412]	3.81575e-06	3.14003
A_23_P159390	TOPBP1	NM_007027	Homo sapiens topoisomerase (DNA) II binding protein 1 (TOPBP1), mRNA [NM_007027]	0.00237673	3.13633
A_23_P501887	DHPS	NM_013407	Homo sapiens deoxyhypusine synthase (DHPS), transcript variant 3, mRNA [NM_013407]	2.57212e-05	3.13196
A_23_P364809	PYGO1	NM_015617	Homo sapiens pygopus homolog 1 (Drosophila) (PYGO1), mRNA [NM_015617]	1.9285e-07	3.13195
A_23_P41804	NKD2	NM_033120	Homo sapiens naked cuticle homolog 2 (Drosophila) (NKD2), mRNA [NM_033120]	1.37824e-07	3.13085
A_24_P122524	WDR3	NM_006784	Homo sapiens WD repeat domain 3 (WDR3), mRNA [NM_006784]	0.00137278	3.12879
A_32_P72447	UBE2S	NM_014501	Homo sapiens ubiquitin-conjugating enzyme E2S (UBE2S), mRNA [NM_014501]	0.00110627	3.12757
A_23_P310421	CHST12	NM_018641	Homo sapiens carbohydrate (chondroitin 4) sulfotransferase 12 (CHST12), mRNA [NM_018641]	0.000762725	3.12554
A_23_P26905	POLG2	NM_007215	Homo sapiens polymerase (DNA directed), gamma 2, accessory subunit (POLG2), mRNA [NM_007215]	0.000227646	3.12537
A_24_P183334	UGT3A1	NM_152404	Homo sapiens UDP glycosyltransferase 3 family, polypeptide A1 (UGT3A1), mRNA [NM_152404]	2.76245e-05	3.12456
A_24_P76898	PPP2R5C	NM_178588	Homo sapiens protein phosphatase 2, regulatory subunit B (B56), gamma isoform (PPP2R5C), transcript variant 4, mRNA [NM_178588]	0.001334	3.12455
A_23_P121064	PTX3	NM_002852	Homo sapiens pentraxin-related gene, rapidly induced by IL-1 beta (PTX3), mRNA [NM_002852]	0.000761887	3.12385
A_23_P304489	FAM19A5	NM_015381	Homo sapiens family with sequence similarity 19 (chemokine (C-C motif)-like), member A5 (FAM19A5), mRNA [NM_015381]	5.53084e-07	3.1234
A_24_P59632	PDCD6	NM_013232	Homo sapiens programmed cell death 6 (PDCD6), mRNA [NM_013232]	0.00624142	3.12295
A_23_P16415	LRP3	NM_002333	Homo sapiens low density lipoprotein receptor-related protein 3 (LRP3), mRNA [NM_002333]	0.00548319	3.12279
A_23_P431776	ETV4	NM_001986	Homo sapiens ets variant gene 4 (E1A enhancer binding protein, E1AF) (ETV4), mRNA [NM_001986]	0.00199567	3.12226
A_24_P417959	C14orf43	NM_194278	Homo sapiens chromosome 14 open reading frame 43 (C14orf43), mRNA [NM_194278]	7.23976e-05	3.11891
A_23_P86133	RPA2	NM_002946	Homo sapiens replication protein A2, 32kDa (RPA2), mRNA [NM_002946]	0.000275421	3.11574
A_23_P60488	ODF2	NM_002540	Homo sapiens outer dense fiber of sperm tails 2 (ODF2), transcript variant 1, mRNA [NM_002540]	9.71603e-05	3.11469
A_23_P408285	PRICKLE1	NM_153026	Homo sapiens prickle-like 1 (Drosophila) (PRICKLE1), mRNA [NM_153026]	0.000196573	3.11358
A_23_P145841	SOSTDC1	NM_015464	Homo sapiens sclerostin domain containing 1 (SOSTDC1), mRNA [NM_015464]	5.50421e-06	3.10911
A_23_P372923	FGFR1	NM_023110	Homo sapiens fibroblast growth factor receptor 1 (fms-related tyrosine kinase 2, Pfeiffer syndrome) (FGFR1), transcript variant 1, mRNA [NM_023110]	2.26582e-07	3.10862
A_23_P141992	HSD11B1L	NM_198706	Homo sapiens hydroxysteroid (11-beta) dehydrogenase 1-like (HSD11B1L), transcript variant b, mRNA [NM_198706]	0.00333359	3.10808
A_23_P74914	KIAA0133	NM_014777	Homo sapiens KIAA0133 (KIAA0133), mRNA [NM_014777]	0.00028086	3.10561
A_23_P42397	PRSS35	NM_153362	Homo sapiens protease, serine, 35 (PRSS35), mRNA [NM_153362]	7.02705e-07	3.10419
A_23_P126457	ISG20L2	NM_030980	Homo sapiens interferon stimulated exonuclease gene 20kDa-like 2 (ISG20L2), mRNA [NM_030980]	0.000577429	3.10241
A_23_P63534	XPR1	NM_004736	Homo sapiens xenotropic and polytropic retrovirus receptor (XPR1), mRNA [NM_004736]	0.000138985	3.10159
A_23_P123193	ABHD2	NM_007011	Homo sapiens abhydrolase domain containing 2 (ABHD2), transcript variant 1, mRNA [NM_007011]	0.000673743	3.10139
A_23_P166779	LOH3CR2A	NM_013343	Homo sapiens loss of heterozygosity, 3, chromosomal region 2, gene A (LOH3CR2A), mRNA [NM_013343]	5.92819e-07	3.09977
A_23_P49627	MRC2	NM_006039	Homo sapiens mannose receptor, C type 2 (MRC2), mRNA [NM_006039]	8.21499e-05	3.09784
A_32_P50066	MAN1C1	NM_020379	Homo sapiens mannosidase, alpha, class 1C, member 1 (MAN1C1), mRNA [NM_020379]	9.10099e-05	3.09358
A_23_P105923	DIO3	NM_001362	Homo sapiens deiodinase, iodothyronine, type III (DIO3), mRNA [NM_001362]	9.74956e-05	3.08943
A_23_P20622	CD302	NM_014880	Homo sapiens CD302 molecule (CD302), mRNA [NM_014880]	0.00692235	3.08875
A_23_P165333	BIN1	NM_139346	Homo sapiens bridging integrator 1 (BIN1), transcript variant 4, mRNA [NM_139346]	0.000364861	3.08635
A_23_P31686	KIAA1967	NM_021174	Homo sapiens KIAA1967 (KIAA1967), transcript variant 1, mRNA [NM_021174]	0.000424404	3.0863
A_24_P942321	FLJ39660	BC062449	Homo sapiens hypothetical protein FLJ39660, mRNA (cDNA clone MGC:72171 IMAGE:4556987), complete cds. [BC062449]	0.00716798	3.08517
A_23_P21333	MGC39900	NM_194324	Homo sapiens hypothetical protein MGC39900 (MGC39900), mRNA [NM_194324]	4.52839e-05	3.08288
A_23_P86838	SLC36A4	NM_152313	Homo sapiens solute carrier family 36 (proton/amino acid symporter), member 4 (SLC36A4), mRNA [NM_152313]	9.95229e-05	3.08204
A_24_P383480	PROS1	NM_000313	Homo sapiens protein S (alpha) (PROS1), mRNA [NM_000313]	1.30931e-07	3.082
A_24_P207503	MEGF6	NM_001409	Homo sapiens multiple EGF-like-domains 6 (MEGF6), mRNA [NM_001409]	0.00306454	3.08153
A_23_P124559	MXD3	NM_031300	Homo sapiens MAX dimerization protein 3 (MXD3), mRNA [NM_031300]	1.91661e-06	3.08053
A_23_P24515	ACAT1	NM_000019	Homo sapiens acetyl-Coenzyme A acetyltransferase 1 (acetoacetyl Coenzyme A thiolase) (ACAT1), nuclear gene encoding mitochondrial protein, mRNA [NM_000019]	0.00121627	3.07665
A_23_P335198	MEGF8	NM_001410	Homo sapiens multiple EGF-like-domains 8 (MEGF8), mRNA [NM_001410]	4.01107e-05	3.07553
A_23_P1740	NAV2	AJ488207	Homo sapiens partial mRNA for steerin2 protein (STEERIN2 gene), alternative exon 1f. [AJ488207]	5.03488e-06	3.06904
A_32_P82111	LRFN2	NM_020737	Homo sapiens leucine rich repeat and fibronectin type III domain containing 2 (LRFN2), mRNA [NM_020737]	2.86792e-09	3.06858
A_23_P50535	DMPK	NM_004409	Homo sapiens dystrophia myotonica-protein kinase (DMPK), mRNA [NM_004409]	1.33889e-05	3.06851
A_23_P254801	PLCG1	NM_002660	Homo sapiens phospholipase C, gamma 1 (PLCG1), transcript variant 1, mRNA [NM_002660]	0.00520833	3.06753
A_23_P147277	TSEN54	AK094466	Homo sapiens cDNA FLJ37147 fis, clone BRACE2025316, weakly similar to tRNA-splicing endonuclease subunit. [AK094466]	5.38981e-05	3.06701
A_23_P107073	RPA1	NM_002945	Homo sapiens replication protein A1, 70kDa (RPA1), mRNA [NM_002945]	4.47465e-05	3.06627
A_23_P143274	NRG2	NM_004883	Homo sapiens neuregulin 2 (NRG2), transcript variant 1, mRNA [NM_004883]	1.58073e-07	3.06599
A_23_P345564	OPRL1	NM_182647	Homo sapiens opiate receptor-like 1 (OPRL1), transcript variant 1, mRNA [NM_182647]	4.43929e-06	3.06504
A_24_P111912	C5orf21	NM_032042	Homo sapiens chromosome 5 open reading frame 21 (C5orf21), mRNA [NM_032042]	0.000811496	3.06373
A_24_P337867	TMEM142B	NM_032831	Homo sapiens transmembrane protein 142B (TMEM142B), mRNA [NM_032831]	0.00125142	3.06151
A_23_P129064	GATM	NM_001482	Homo sapiens glycine amidinotransferase (L-arginine:glycine amidinotransferase) (GATM), mRNA [NM_001482]	1.67485e-05	3.06042
A_23_P390006	PCSK6	NM_138325	Homo sapiens proprotein convertase subtilisin/kexin type 6 (PCSK6), transcript variant 6, mRNA [NM_138325]	2.94095e-06	3.05822
A_24_P287756	NUDT10	NM_153183	Homo sapiens nudix (nucleoside diphosphate linked moiety X)-type motif 10 (NUDT10), mRNA [NM_153183]	1.60345e-05	3.05779
A_23_P144311	POLR2B	NM_000938	Homo sapiens polymerase (RNA) II (DNA directed) polypeptide B, 140kDa (POLR2B), mRNA [NM_000938]	6.42287e-05	3.05324
A_23_P39445	RKHD1	NM_203304	Homo sapiens ring finger and KH domain containing 1 (RKHD1), mRNA [NM_203304]	0.00279284	3.05155
A_23_P304511	ZNF397	AF533250	Homo sapiens zinc finger protein (ZNF397) mRNA, complete cds. [AF533250]	6.92782e-08	3.05122
A_23_P7337	EDNRA	NM_001957	Homo sapiens endothelin receptor type A (EDNRA), mRNA [NM_001957]	7.39274e-06	3.04883
A_23_P151895	CILP	NM_003613	Homo sapiens cartilage intermediate layer protein, nucleotide pyrophosphohydrolase (CILP), mRNA [NM_003613]	2.23801e-08	3.04766
A_23_P59444	SLC35B4	NM_032826	Homo sapiens solute carrier family 35, member B4 (SLC35B4), mRNA [NM_032826]	0.00112841	3.04757
A_23_P162579	HSPB8	NM_014365	Homo sapiens heat shock 22kDa protein 8 (HSPB8), mRNA [NM_014365]	1.53039e-06	3.04701
A_23_P94053	TRRAP	NM_003496	Homo sapiens transformation/transcription domain-associated protein (TRRAP), mRNA [NM_003496]	9.90564e-05	3.04603
A_23_P82478	PUS7	NM_019042	Homo sapiens pseudouridylate synthase 7 homolog (S. cerevisiae) (PUS7), mRNA [NM_019042]	0.0086614	3.045
A_24_P737939	C6orf154	NM_001012974	Homo sapiens chromosome 6 open reading frame 154 (C6orf154), mRNA [NM_001012974]	4.95871e-05	3.03913
A_23_P159355	POLE	AF128541	Homo sapiens DNA polymerase epsilon catalytic subunit isoform a (POLE1) mRNA, partial cds. [AF128541]	0.000716046	3.03313
A_23_P216966	PTGS1	NM_000962	Homo sapiens prostaglandin-endoperoxide synthase 1 (prostaglandin G/H synthase and cyclooxygenase) (PTGS1), transcript variant 1, mRNA [NM_000962]	0.000134785	3.02465
A_24_P278299	ARHGEF17	NM_014786	Homo sapiens Rho guanine nucleotide exchange factor (GEF) 17 (ARHGEF17), mRNA [NM_014786]	0.00241385	3.02329
A_23_P24457	LOC90835	NM_001014979	Homo sapiens hypothetical protein LOC90835 (LOC90835), mRNA [NM_001014979]	8.79717e-08	3.02296
A_24_P134356	BTBD3	NM_014962	Homo sapiens BTB (POZ) domain containing 3 (BTBD3), transcript variant 1, mRNA [NM_014962]	2.31589e-05	3.02285
A_23_P76267	TMEM119	NM_181724	Homo sapiens transmembrane protein 119 (TMEM119), mRNA [NM_181724]	6.73196e-07	3.02282
A_23_P160638	BCOR	NM_017745	Homo sapiens BCL6 co-repressor (BCOR), transcript variant 1, mRNA [NM_017745]	1.80188e-05	3.02204
A_23_P329375	POU6F1	NM_002702	Homo sapiens POU domain, class 6, transcription factor 1 (POU6F1), mRNA [NM_002702]	9.49325e-05	3.02184
A_23_P47704	UCP2	NM_003355	Homo sapiens uncoupling protein 2 (mitochondrial, proton carrier) (UCP2), nuclear gene encoding mitochondrial protein, mRNA [NM_003355]	3.09556e-05	3.02152
A_23_P155638	MYL3	NM_000258	Homo sapiens myosin, light polypeptide 3, alkali; ventricular, skeletal, slow (MYL3), mRNA [NM_000258]	1.50223e-06	3.0213
A_32_P73775	KCNK3	NM_002246	Homo sapiens potassium channel, subfamily K, member 3 (KCNK3), mRNA [NM_002246]	0.00010632	3.01882
A_24_P389916	LRRC32	NM_005512	Homo sapiens leucine rich repeat containing 32 (LRRC32), mRNA [NM_005512]	0.00118515	3.01609
A_24_P389517	HMGB1	NM_002128	Homo sapiens high-mobility group box 1 (HMGB1), mRNA [NM_002128]	0.00364901	3.01595
A_32_P133884	TUSC1	NM_001004125	Homo sapiens tumor suppressor candidate 1 (TUSC1), mRNA [NM_001004125]	0.000821915	3.01209
A_32_P106944	ZNF429	NM_001001415	Homo sapiens zinc finger protein 429 (ZNF429), mRNA [NM_001001415]	2.21694e-05	3.01019
A_23_P14302	C11orf67	BC041959	Homo sapiens cDNA clone IMAGE:5302136. [BC041959]	0.00521382	3.00915
A_23_P393697	MGC27345	BC024231	Homo sapiens hypothetical protein MGC27345, mRNA (cDNA clone MGC:27345 IMAGE:4670552), complete cds. [BC024231]	0.000140412	3.00573
A_23_P160607	BCAN	NM_021948	Homo sapiens brevican (BCAN), transcript variant 1, mRNA [NM_021948]	1.13802e-09	3.00431
A_23_P258393	PPM1M	NM_144641	Homo sapiens protein phosphatase 1M (PP2C domain containing) (PPM1M), mRNA [NM_144641]	7.50464e-06	3.00289
