# Supplementary material for: Genome-Wide Profiling of Histone H3 Lysine 4 and Lysine 27 Trimethylation Reveals an Epigenetic Signature in Prostate Carcinogenesis
Source: PLoS One. 2009 Mar 5;4(3):e4687. doi: 10.1371/journal.pone.0004687 (PMC2650415; doi:10.1371/journal.pone.0004687)
Supplement: Table S11 — Differentially expressed miRNAs in EP156T cells and PC3 cells (0.03 MB XLS) [file pone.0004687.s012.xls]

## Sheet: Sheet1
Downregulated miRNAs in PC3 cells											Upregulated miRNAs in PC3 cells
miRNA	logFC	*FC	p-value	adj. P-value	B	probability	#excluded				miRNA	logFC	*FC	p-value	adj. P-value	B	probability	#excluded
hsa-miR-31	-16.0143	1.51084e-05	2.26686e-09	1.7265e-06	8.14036	0.999709					hsa-miR-199a-3p	12.1737	4620.09	1.88377e-08	1.8126e-06	7.77815	0.999581
hsa-miR-141	-14.3204	4.88803e-05	0.000203757	0.00271468	1.42496	0.806115					hsa-miR-199b-3p	11.9833	4048.97	8.74548e-09	1.7265e-06	7.93899	0.999644
hsa-miR-200b	-13.6105	7.99507e-05	1.70075e-08	1.8126e-06	7.80188	0.999591					hsa-miR-218	11.9434	3938.54	1.62272e-08	1.8126e-06	7.81253	0.999596
hsa-miR-221	-13.2137	0.000105262	5.94934e-09	1.7265e-06	8.00597	0.999667					hsa-miR-143	10.7792	1757.42	1.60546e-07	8.68957e-06	7.07947	0.999158
hsa-miR-203	-12.9613	0.00012539	9.96827e-09	1.7265e-06	7.91425	0.999635					hsa-miR-9*	10.7396	1709.8	5.81265e-08	4.19479e-06	7.46244	0.999426
hsa-miR-222	-12.7659	0.000143578	9.29306e-09	1.7265e-06	7.92764	0.999639					hsa-miR-137	9.16663	574.686	3.34254e-08	2.63149e-06	7.63048	0.999515
hsa-miR-205	-12.4857	0.000174348	2.67417e-08	2.31583e-06	7.69097	0.999543					hsa-miR-301a	7.9091	240.368	3.28429e-07	1.67306e-05	6.74549	0.998825
hsa-miR-200a	-11.9725	0.000248843	1.69714e-08	1.8126e-06	7.80236	0.999591					hsa-miR-199a-5p	7.84588	230.063	2.30813e-06	9.08563e-05	5.54445	0.996106
hsa-miR-200c	-11.9551	0.00025185	1.36392e-07	8.04775e-06	7.14789	0.999214					hsa-miR-153	7.08511	135.778	2.91307e-06	0.000105113	5.37279	0.99538
hsa-miR-31*	-10.0496	0.000943582	3.78909e-07	1.82297e-05	6.67202	0.998736					hsa-miR-376c	6.43606	86.5856	5.22982e-07	2.26451e-05	6.498	0.998496
hsa-miR-29b	-9.80517	0.00111776	5.6918e-05	0.00100594	2.73942	0.939313					hsa-miR-363	5.76704	54.4569	3.32235e-05	0.000669105	3.26775	0.963306
hsa-miR-96	-8.83708	0.00218663	3.76651e-06	0.000125454	5.17665	0.994385					hsa-miR-1269	5.69262	51.7188	3.66747e-06	0.000125454	5.19731	0.994499
hsa-miR-224	-8.04694	0.0037812	7.06023e-06	0.000210833	4.66892	0.990705					hsa-miR-376a	5.64716	50.1147	4.50803e-05	0.000830456	2.97048	0.951223
hsa-miR-21*	-7.87941	0.00424681	9.25961e-08	6.16833e-06	7.29952	0.999325					hsa-miR-648	5.21528	37.1498	1.8076e-05	0.000447252	3.84134	0.978986
hsa-miR-429	-7.14588	0.00706115	8.6563e-05	0.00133863	2.31611	0.910203					hsa-miR-145	5.06771	33.5378	2.77747e-06	0.000104578	5.40841	0.995541
hsa-miR-10a	-6.99859	0.00782015	6.00651e-05	0.00104033	2.68563	0.936174					hsa-miR-375	4.94826	30.8727	2.82121e-05	0.000626454	3.42446	0.96846
hsa-miR-455-3p	-6.81427	0.00888589	1.39395e-07	8.04775e-06	7.13891	0.999207					hsa-miR-299-5p	4.81613	28.1709	3.06697e-05	0.000663998	3.34464	0.965929
hsa-miR-34c-5p	-6.61183	0.0102245	8.55936e-05	0.00133863	2.32761	0.911138					hsa-miR-421	4.69844	25.964	0.00782251	0.0559859	-2.58849	0.0698827
hsa-miR-29a	-5.66162	0.0197553	4.62856e-07	2.10965e-05	6.56534	0.998594					hsa-miR-1233	4.69599	25.9199	3.93336e-05	0.000756953	3.10406	0.95706
hsa-miR-29c	-5.57091	0.0210373	6.70684e-05	0.00111695	2.57489	0.929228					hsa-miR-1181	4.38891	20.9505	0.000177812	0.00240602	1.56887	0.827622
hsa-miR-34b*	-5.46477	0.0226433	0.00343679	0.03037	-1.67079	0.158319					hsa-miR-101	4.37819	20.7953	2.51399e-05	0.000581869	3.53383	0.971635
hsa-miR-182	-5.38681	0.0239006	3.30475e-05	0.000669105	3.27287	0.963486					hsa-miR-382	4.14576	17.701	4.60299e-05	0.000830456	2.94996	0.950262
hsa-miR-548g	-5.13102	0.028537	0.00302947	0.0273284	-1.53005	0.177987					hsa-miR-25	3.93967	15.3447	0.000143367	0.00200252	1.79482	0.857517
hsa-miR-618	-5.09048	0.0293504	0.00486729	0.0383189	-2.05922	0.113124					hsa-miR-10b	3.85178	14.4379	0.00444272	0.0362962	-1.95734	0.123756
hsa-miR-34a*	-4.66017	0.0395503	1.88281e-06	7.76434e-05	5.68985	0.996631					hsa-miR-106b*	3.81995	14.1227	0.00119175	0.0122863	-0.493036	0.379179
hsa-miR-26b*	-4.61613	0.0407762	0.00890682	0.0612167	-2.73307	0.0610499					hsa-let-7g*	3.792	13.8518	3.64185e-05	0.000716782	3.17896	0.960035
hsa-miR-22*	-4.49852	0.0442397	2.55324e-05	0.000581869	3.51919	0.971229					hsa-miR-374b	3.77114	13.653	0.000511234	0.00632469	0.436234	0.607361
hsa-miR-424	-4.25207	0.0524807	2.29611e-05	0.000552342	3.61915	0.973894					hsa-miR-1231	3.72541	13.2269	0.00712202	0.0522684	-2.48393	0.0769926
hsa-miR-942	-4.248	0.0526289	3.22956e-05	0.000669105	3.29503	0.964258					hsa-miR-487b	3.68744	12.8834	0.000110177	0.00159022	2.0684	0.887793
hsa-let-7a*	-4.03593	0.0609627	0.00068741	0.00793729	0.112837	0.528179					hsa-miR-99a	3.4756	11.1239	0.00152738	0.0150308	-0.767915	0.31693
hsa-miR-1259	-3.89124	0.067394	0.00122872	0.0125185	-0.526838	0.371255					hsa-miR-138	3.19994	9.18923	0.000262512	0.00339307	1.15541	0.760497
hsa-miR-335*	-3.80253	0.071668	0.00416716	0.0343691	-1.88586	0.131718					hsa-miR-941	3.08077	8.46067	0.00481428	0.0383189	-2.047	0.114356
hsa-miR-378	-3.61483	0.0816258	6.79685e-06	0.000210217	4.70073	0.990993					hsa-miR-15b	2.96817	7.82542	8.52629e-06	0.000241351	4.50905	0.989111
hsa-miR-30a*	-3.33832	0.0988705	0.00257109	0.0238871	-1.34713	0.20634					hsa-miR-662	2.93302	7.63709	0.00117688	0.0122792	-0.479154	0.382452
hsa-miR-517a	-3.3349	0.0991046	0.00223845	0.0210706	-1.19279	0.23276					hsa-miR-18b	2.90687	7.49991	0.000162006	0.00222693	1.6668	0.841149
hsa-miR-193b	-3.31618	0.100399	7.69457e-05	0.00123398	2.43599	0.919531					hsa-miR-532-5p	2.90462	7.48822	0.00997251	0.0680015	-2.85881	0.0542275
hsa-miR-22	-3.10691	0.116072	4.65555e-06	0.000149323	5.00978	0.993372					hsa-miR-152	2.88017	7.36239	1.40525e-05	0.000368772	4.07036	0.983215
hsa-miR-21	-2.9713	0.127511	4.32231e-05	0.000813721	3.01182	0.953105					hsa-miR-106b	2.84631	7.19159	1.57159e-05	0.000400293	3.96923	0.981462
hsa-miR-30a	-2.90116	0.133864	1.14735e-05	0.000310502	4.25099	0.98595					hsa-miR-18a	2.82798	7.10078	7.51355e-05	0.00122769	2.46013	0.921299
hsa-miR-422a	-2.09395	0.234238	9.2952e-05	0.00136435	2.24328	0.90407					hsa-miR-93	2.79534	6.94193	8.89623e-05	0.0013516	2.28818	0.907894
hsa-miR-148a	-2.0913	0.234668	0.00296183	0.0269994	-1.50486	0.181701					hsa-miR-130b	2.76614	6.80283	8.63957e-06	0.000241351	4.49775	0.988989
*FC:Fold Change of EP156T/PC3											hsa-miR-361-5p	2.49394	5.63316	6.22235e-05	0.00105658	2.65026	0.934027
# excluded: Genes were not included in Agilent ChIP on Chip promoter microarrays											hsa-miR-602	2.34416	5.07764	0.00873011	0.0604822	-2.71076	0.0623414
											hsa-miR-27b*	2.25985	4.78943	0.00401291	0.0337396	-1.84375	0.136608
											hsa-miR-129	2.22858	4.68673	0.000843898	0.0091352	-0.112326	0.471948
											hsa-miR-126	2.19398	4.57567	0.000733541	0.00827907	0.0416271	0.510405
											hsa-miR-409	2.15003	4.43836	0.00862641	0.0604822	-2.69746	0.0631237
											hsa-miR-17*	2.07828	4.22305	0.00684471	0.0506625	-2.43964	0.0801991
											# excluded: Genes were not included in Agilent ChIP on Chip promoter microarrays
