# Supplementary material for: Genome-Wide Profiling of Histone H3 Lysine 4 and Lysine 27 Trimethylation Reveals an Epigenetic Signature in Prostate Carcinogenesis
Source: PLoS One. 2009 Mar 5;4(3):e4687. doi: 10.1371/journal.pone.0004687 (PMC2650415; doi:10.1371/journal.pone.0004687)
Supplement: Table S12 — Epigenetic activated oncogene and repressed tumor suppressor genes (0.09 MB XLS) [file pone.0004687.s013.xls]

## Sheet: Sheet1
Group1 epigenetic activated genes in PC3 cells -1											Epigenetic modification
Gene symbol	Accession number	Description	PC3/EP156T Fold change	p-value	Function	mechanism	References				EP156T	PC3
ABCB4	NM_018850	Homo sapiens ATP-binding cassette, sub-family B (MDR/TAP), member 4 (ABCB4), transcript variant C, mRNA [NM_018850]	3.6437	2.22135e-05	oncogene	carcinogenesis	Heimerl S, Bosserhoff AK, Langmann T, Ecker J, Schmitz G.Mapping ATP-binding cassette transporter gene expression profiles in melanocytes and melanoma cells.Melanoma Res. 2007;17(5):265-73.			ABCB4
ALK	NM_004304	Homo sapiens anaplastic lymphoma kinase (Ki-1) (ALK), mRNA [NM_004304]	7.81662	3.97174e-06	oncogene	carcinogenesis	Carén H, Abel F, Kogner P, Martinsson T.High incidence of DNA mutations and gene amplifications of the ALK gene in advanced sporadic neuroblastoma tumours.Biochem J. 2008 Oct 7.1: [Epub ahead of print]			ALK					H3K4me3
ARC	NM_015193	Homo sapiens activity-regulated cytoskeleton-associated protein (ARC), mRNA [NM_015193]	4.45923	5.1951e-05	oncogene	carcinogenesis	Mercier I, Vuolo M, Jasmin JF, Medina CM, Williams M, Mariadason JM, Qian H, Xue X, Pestell RG, Lisanti MP, Kitsis RN.ARC (apoptosis repressor with caspase recruitment domain) is a novel marker of human colon cancer.Cell Cycle. 2008;7(11):1640-7.			ARC					H3K4K27me3
ARHGAP6	NM_001174	Homo sapiens Rho GTPase activating protein 6 (ARHGAP6), transcript variant 2, mRNA [NM_001174]	5.56157	4.85453e-05	oncogene	carcinogenesis	Katoh Y, Katoh M.Identification and characterization of ARHGAP27 gene in silico. Int J Mol Med. 2004;14(5):943-7			ARHGAP6					Neither
BCL2	NM_000633	Homo sapiens B-cell CLL/lymphoma 2 (BCL2), nuclear gene encoding mitochondrial protein, transcript variant alpha, mRNA [NM_000633]	13.3686	2.31311e-06	oncogene	carcinogenesis	Bozdogan O, Atasoy P, Bozdogan N, Erekul S, Batislam E, Yilmaz E, Başar MM.BAG-1 expression in hyperplastic and neoplastic prostate tissue: is there any relationship with BCL-related proteins and androgen receptor status?Tumori. 2005;91(6):539-45.			BCL2					H3K27me3
CHDH	AK055402	Homo sapiens cDNA FLJ30840 fis, clone FEBRA2002442, highly similar to Homo sapiens partial mRNA for choline dehydrogenase. [AK055402]	4.90689	0.001044	oncogene	carcinogenesis	Xu X, Gammon MD, Zeisel SH, Lee YL, Wetmur JG, Teitelbaum SL, Bradshaw PT, Neugut AI, Santella RM, Chen J.Choline metabolism and risk of breast cancer in a population-based study.FASEB J. 2008;22(6):2045-52			CHDH
CHN1	NM_001822	Homo sapiens chimerin (chimaerin) 1 (CHN1), transcript variant 1, mRNA [NM_001822]	147.548	3.3785e-06	oncogene	carcinogenesis	Katoh M, Katoh M.Characterization of human ARHGAP10 gene in silico.Int J Oncol. 2004;25(4):1201-6			CHN1
CHRNA5	NM_000745	Homo sapiens cholinergic receptor, nicotinic, alpha 5 (CHRNA5), mRNA [NM_000745]	8.97559	0.000700804	oncogene	carcinogenesis	Hung RJ, McKay JD, Gaborieau V, Boffetta P, Hashibe M, Zaridze D, Mukeria A, Szeszenia-Dabrowska N, Lissowska J, Rudnai P, Fabianova E, Mates D, Bencko V, Foretova L, Janout V, Chen C, Goodman G, Field JK, Liloglou T, Xinarianos G, Cassidy A, McLaughlin J, Liu G, Narod S, Krokan HE, Skorpen F, Elvestad MB, Hveem K, Vatten L, Linseisen J, Clavel-Chapelon F, Vineis P, Bueno-de-Mesquita HB, Lund E, …			CHRNA5
CHRNB4	NM_000750	Homo sapiens cholinergic receptor, nicotinic, beta 4 (CHRNB4), mRNA [NM_000750]	4.03791	5.30797e-07	oncogene	carcinogenesis	Hung RJ, McKay JD, Gaborieau V, Boffetta P, Hashibe M, Zaridze D, Mukeria A, Szeszenia-Dabrowska N, Lissowska J, Rudnai P, Fabianova E, Mates D, Bencko V, Foretova L, Janout V, Chen C, Goodman G, Field JK, Liloglou T, Xinarianos G, Cassidy A, McLaughlin J, Liu G, Narod S, Krokan HE, Skorpen F, Elvestad MB, Hveem K, Vatten L, Linseisen J, Clavel-Chapelon F, Vineis P, Bueno-de-Mesquita HB, Lund E, …			CHRNB4
DLK1	NM_003836	Homo sapiens delta-like 1 homolog (Drosophila) (DLK1), transcript variant 1, mRNA [NM_003836]	615.428	2.11334e-07	oncogene	carcinogenesis	Jin ZH, Yang RJ, Dong B, Xing BC.Progenitor gene DLK1 might be an independent prognostic factor of liver cancer.Expert Opin Biol Ther. 2008;8(4):371-7			DLK1
DUSP26	NM_024025	Homo sapiens dual specificity phosphatase 26 (putative) (DUSP26), mRNA [NM_024025]	94.7595	7.5251e-07	oncogene	carcinogenesis	Yu W, Imoto I, Inoue J, Onda M, Emi M, Inazawa J.A novel amplification target, DUSP26, promotes anaplastic thyroid cancer cell growth by inhibiting p38 MAPK activity.Oncogene. 2007;26(8):1178-87.			DUSP26
ENO2	NM_001975	Homo sapiens enolase 2 (gamma, neuronal) (ENO2), mRNA [NM_001975]	13.1664	0.000283134	oncogene	carcinogenesis	Yeh CS, Wang JY, Chung FY, Lee SC, Huang MY, Kuo CW, Yang MJ, Lin SR.Significance of the glycolytic pathway and glycolysis related-genes in tumorigenesis of human colorectal cancers.Oncol Rep. 2008;19(1):81-91.			ENO2
ESRRG	NM_206594	Homo sapiens estrogen-related receptor gamma (ESRRG), transcript variant 2, mRNA [NM_206594]	46.561	4.32137e-06	oncogene	carcinogenesis	Pelliccia F, Curatolo A, Limongi ZM, Bosco N, Rocchi A.Transcriptional profiling of genes at the human common fragile site FRA1H in tumor-derived cell lines.Cancer Genet Cytogenet. 2007;178(2):144-50.			ESRRG
FGFR1	NM_023111	Homo sapiens fibroblast growth factor receptor 1 (fms-related tyrosine kinase 2, Pfeiffer syndrome) (FGFR1), transcript variant 9, mRNA [NM_023111]	6.12339	1.82967e-05	oncogene	carcinogenesis	Abate-Shen C, Shen MM.FGF signaling in prostate tumorigenesis--new insights into epithelial-stromal interactions.Cancer Cell. 2007;12(6):495-7			FGFR1
GEFT	NM_182947	Homo sapiens RAC/CDC42 exchange factor (GEFT), transcript variant 1, mRNA [NM_182947]	33.8287	3.75642e-05	oncogene	carcinogenesis	Guo X, Stafford LJ, Bryan B, Xia C, Ma W, Wu X, Liu D, Songyang Z, Liu M.A Rac/Cdc42-specific exchange factor, GEFT, induces cell proliferation, transformation, and migration.J Biol Chem.2003;278(15):13207-15.			GEFT
GSTM4	NM_147148	Homo sapiens glutathione S-transferase M4 (GSTM4), transcript variant 2, mRNA [NM_147148]	3.02537	9.89301e-05	oncogene	carcinogenesis	Liloglou T, Walters M, Maloney P, Youngson J, Field JK. A T2517C polymorphism in the GSTM4 gene is associated with risk of developing lung cancer. Lung Cancer. 2002;37(2):143-6.			GSTM4
GUCY1A3	NM_000856	Homo sapiens guanylate cyclase 1, soluble, alpha 3 (GUCY1A3), mRNA [NM_000856]	4.03948	0.00010926	oncogene	carcinogenesis	Dong Y, Zhang H, Gao AC, Marshall JR, Ip C.Androgen receptor signaling intensity is a key factor in determining the sensitivity of prostate cancer cells to selenium inhibition of growth and cancer-specific biomarkers.Mol Cancer Ther. 2005;4(7):1047-55.			GUCY1A3
HDAC5	NM_001015053	Homo sapiens histone deacetylase 5 (HDAC5), transcript variant 3, mRNA [NM_001015053]	3.35197	0.00102522	oncogene	carcinogenesis	Ozdağ H, Teschendorff AE, Ahmed AA, Hyland SJ, Blenkiron C, Bobrow L, Veerakumarasivam A, Burtt G, Subkhankulova T, Arends MJ, Collins VP, Bowtell D, Kouzarides T, Brenton JD, Caldas C.Differential expression of selected histone modifier genes in human solid cancers.BMC Genomics. 2006;7:90.			HDAC5
HOXC5	NM_018953	Homo sapiens homeobox C5 (HOXC5), transcript variant 1, mRNA [NM_018953]	3.43253	0.000504988	oncogene	carcinogenesis	Miller GJ, Miller HL, van Bokhoven A, Lambert JR, Werahera PN, Schirripa O, Lucia MS, Nordeen SK.Aberrant HOXC expression accompanies the malignant phenotype in human prostate.Cancer Res. 2003 Sep 15;63(18):5879-88.			HOXC5
LIN28B	NM_001004317	Homo sapiens lin-28 homolog B (C. elegans) (LIN28B), mRNA [NM_001004317]	5.1997	0.000536935	oncogene	carcinogenesis	Guo Y, Chen Y, Ito H, Watanabe A, Ge X, Kodama T, Aburatani H.Identification and characterization of lin-28 homolog B (LIN28B) in human hepatocellular carcinoma.Gene. 2006;384:51-61.			LIN28B
LMO1	NM_002315	Homo sapiens LIM domain only 1 (rhombotin 1) (LMO1), mRNA [NM_002315]	122.502	8.34887e-08	oncogene	carcinogenesis	Aoyama M, Ozaki T, Inuzuka H, Tomotsune D, Hirato J, Okamoto Y, Tokita H, Ohira M, Nakagawara A.LMO3 interacts with neuronal transcription factor, HEN2, and acts as an oncogene in neuroblastoma.Cancer Res. 2005;65(11):4587-97.			LMO1
LOXL3	NM_032603	Homo sapiens lysyl oxidase-like 3 (LOXL3), mRNA [NM_032603]	22.6103	6.27809e-05	oncogene	carcinogenesis	Peinado H, Del Carmen Iglesias-de la Cruz M, Olmeda D, Csiszar K, Fong KS, Vega S, Nieto MA, Cano A, Portillo F.A molecular role for lysyl oxidase-like 2 enzyme in snail regulation and tumor progression.EMBO J.;2005 24(19):3446-58			LOXL3
MEIS2	NM_170677	Homo sapiens Meis1, myeloid ecotropic viral integration site 1 homolog 2 (mouse) (MEIS2), transcript variant a, mRNA [NM_170677]	40.3259	2.852e-05	oncogene	carcinogenesis	Dekel B, Metsuyanim S, Schmidt-Ott KM, Fridman E, Jacob-Hirsch J, Simon A, Pinthus J, Mor Y, Barasch J, Amariglio N, Reisner Y, Kaminski N, Rechavi G.Multiple imprinted and stemness genes provide a link between normal and tumor progenitor cells of the developing human kidney.Cancer Res. 2006 Jun 15;66(12):6040-9.			MEIS2
NTRK1	NM_002529	Homo sapiens neurotrophic tyrosine kinase, receptor, type 1 (NTRK1), transcript variant 2, mRNA [NM_002529]	30.0751	3.39227e-06	oncogene	carcinogenesis	Marchetti A, Felicioni L, Pelosi G, Del Grammastro M, Fumagalli C, Sciarrotta M, Malatesta S, Chella A, Barassi F, Mucilli F, Camplese P, D'Antuono T, Sacco R, Buttitta F.Frequent mutations in the neurotrophic tyrosine receptor kinase gene family in large cell neuroendocrine carcinoma of the lung.Hum Mutat. 2008;29(5):609-16.			NTRK1
PODXL	NM_001018111	Homo sapiens podocalyxin-like (PODXL), transcript variant 1, mRNA [NM_001018111]	36.379	2.18356e-05	oncogene	carcinogenesis	Stanhope-Baker P, Kessler PM, Li W, Agarwal ML, Williams BR.The Wilms tumor suppressor-1 target gene podocalyxin is transcriptionally repressed by p53.J Biol Chem. 2004;279(32):33575-85.			PODXL
RGS4	NM_005613	Homo sapiens regulator of G-protein signalling 4 (RGS4), mRNA [NM_005613]	88.4452	5.81718e-07	oncogene	carcinogenesis	Nikolova DN, Zembutsu H, Sechanov T, Vidinov K, Kee LS, Ivanova R, Becheva E, Kocova M, Toncheva D, Nakamura Y.Genome-wide gene expression profiles of thyroid carcinoma: Identification of molecular targets for treatment of thyroid carcinoma.Oncol Rep. 2008;20(1):105-21.			RGS4
RHOBTB3	NM_014899	Homo sapiens Rho-related BTB domain containing 3 (RHOBTB3), mRNA [NM_014899]	50.8343	4.4715e-06	oncogene	carcinogenesis	Berthold J, Schenkova K, Rivero F.Rho GTPases of the RhoBTB subfamily and tumorigenesis.Acta Pharmacol Sin. 2008;29(3):285-95.			RHOBTB3
SALL4	NM_020436	Homo sapiens sal-like 4 (Drosophila) (SALL4), mRNA [NM_020436]	8.24035	3.48413e-05	oncogene	carcinogenesis	Yang J, Chai L, Gao C, Fowles TC, Alipio Z, Dang H, Xu D, Fink LM, Ward DC, Ma Y.SALL4 is a key regulator of survival and apoptosis in human leukemic cells.Blood. 2008;112(3):805-13.			SALL4
SLIT2	NM_004787	Homo sapiens slit homolog 2 (Drosophila) (SLIT2), mRNA [NM_004787]	7.92531	5.31829e-05	oncogene	carcinogenesis	Wang LJ, Zhao Y, Han B, Ma YG, Zhang J, Yang DM, Mao JW, Tang FT, Li WD, Yang Y, Wang R, Geng JG.Targeting Slit-Roundabout signaling inhibits tumor angiogenesis in chemical-induced squamous cell carcinogenesis.Cancer Sci. 2008;99(3):510-7.			SLIT2
TLE3	AB046767	Homo sapiens mRNA for KIAA1547 protein, partial cds. [AB046767]	3.98974	8.0098e-05	oncogene	carcinogenesis	Nakaya HI, Beckedorff FC, Baldini ML, Fachel AA, Reis EM, Verjovski-Almeida S.Splice variants of TLE family genes and up-regulation of a TLE3 isoform in prostate tumors.Biochem Biophys Res Commun. 2007;364(4):918-23.			TLE3
TOPBP1	NM_007027	Homo sapiens topoisomerase (DNA) II binding protein 1 (TOPBP1), mRNA [NM_007027]	3.91773	0.00346385	oncogene	carcinogenesis	Strome ED, Wu X, Kimmel M, Plon SE.Heterozygous screen in Saccharomyces cerevisiae identifies dosage-sensitive genes that affect chromosome stability.Genetics. 2008 Mar;178(3):1193-207.			TOPBP1
TRIM36	NM_018700	Homo sapiens tripartite motif-containing 36 (TRIM36), transcript variant 1, mRNA [NM_018700]	9.92452	0.000138351	oncogene	carcinogenesis	Balint I, Müller A, Nagy A, Kovacs G. Cloning and characterisation of the RBCC728/TRIM36 zinc-binding protein from the tumor suppressor gene region at chromosome 5q22.3. Gene. 2004;332:45-50.			TRIM36
UCP2	NM_003355	Homo sapiens uncoupling protein 2 (mitochondrial, proton carrier) (UCP2), nuclear gene encoding mitochondrial protein, mRNA [NM_003355]	3.19758	0.00173303	oncogene	carcinogenesis	Derdák Z, Fülöp P, Sabo E, Tavares R, Berthiaume EP, Resnick MB, Paragh G, Wands JR, Baffy G.Enhanced colon tumor induction in uncoupling protein-2 deficient mice is associated with NF-kappaB activation and oxidative stress.Carcinogenesis. 2006;27(5):956-61.			UCP2
Group2 epigenetic activated genes in PC3 cells -2											Epigenetic modification
Gene symbol	Accession number	Description	PC3/EP156T Fold change	p-value	Function	mechanism	References				EP156T	PC3
A2M	NM_000014	Homo sapiens alpha-2-macroglobulin (A2M), mRNA [NM_000014]	4.24653	0.00508422	oncogene	metastasis	Larin SS, Gorlina NK, Kozlov IG, Cheredeev AN, Zorin NA, Zorina RM.Binding of alpha2-macroglobulin to collagen type I: modification of collagen matrix by alpha2-macroglobulin induces the enhancement of macrophage migration.Russ J Immunol. 2002;7(1):34-40.			A2M					H3K4me3
ADAM12	NM_003474	Homo sapiens ADAM metallopeptidase domain 12 (meltrin alpha) (ADAM12), transcript variant 1, mRNA [NM_003474]	18.0311	2.35448e-05	oncogene	metastasis	Le Pabic H, Bonnier D, Wewer UM, Coutand A, Musso O, Baffet G, Clément B, Théret N.ADAM12 in human liver cancers: TGF-beta-regulated expression in stellate cells is associated with matrix remodeling.Hepatology. 2003;37(5):1056-66.			ADAM12					H3K4K27me3
ADAMTS4	NM_005099	Homo sapiens ADAM metallopeptidase with thrombospondin type 1 motif, 4 (ADAMTS4), mRNA [NM_005099]	196.213	3.90555e-08	oncogene	metastasis	Okada Y.Tumor cell-matrix interaction: pericellular matrix degradation and metastasis.Verh Dtsch Ges Pathol. 2000;84:33-42.			ADAMTS4					Neither
ADAMTS5	NM_007038	Homo sapiens ADAM metallopeptidase with thrombospondin type 1 motif, 5 (aggrecanase-2) (ADAMTS5), mRNA [NM_007038]	8.08043	8.47347e-05	oncogene	metastasis	Held-Feindt J, Paredes EB, Blömer U, Seidenbecher C, Stark AM, Mehdorn HM, Mentlein R.Matrix-degrading proteases ADAMTS4 and ADAMTS5 (disintegrins and metalloproteinases with thrombospondin motifs 4 and 5) are expressed in human glioblastomas.Int J Cancer. 2006;118(1):55-61.			ADAMTS5					H3K27me3
ASCL1	NM_004316	Homo sapiens achaete-scute complex homolog 1 (Drosophila) (ASCL1), mRNA [NM_004316]	8.84191	0.000164351	oncogene	metastasis	Vias M, Massie CE, East P, Scott H, Warren A, Zhou Z, Nikitin AY, Neal DE, Mills IG.Pro-neural transcription factors as cancer markers.BMC Med Genomics. 2008;1:17.			ASCL1
BAMBI	NM_012342	Homo sapiens BMP and activin membrane-bound inhibitor homolog (Xenopus laevis) (BAMBI), mRNA [NM_012342]	67.5798	2.5325e-06	oncogene	metastasis	Togo N, Ohwada S, Sakurai S, Toya H, Sakamoto I, Yamada T, Nakano T, Muroya K, Takeyoshi I, Nakajima T, Sekiya T, Yamazumi Y, Nakamura T, Akiyama T.Prognostic significance of BMP and activin membrane-bound inhibitor in colorectal cancer.World J Gastroenterol. 2008;14(31):4880-8.			BAMBI
CCL2	NM_002982	Homo sapiens chemokine (C-C motif) ligand 2 (CCL2), mRNA [NM_002982]	55.823	4.67426e-07	oncogene	metastasis	van Golen KL, Ying C, Sequeira L, Dubyk CW, Reisenberger T, Chinnaiyan AM, Pienta KJ, Loberg RD.CCL2 induces prostate cancer transendothelial cell migration via activation of the small GTPase Rac.J Cell Biochem. 2008;104(5):1587-97.			CCL2
CDKN2C	NM_078626	Homo sapiens cyclin-dependent kinase inhibitor 2C (p18, inhibits CDK4) (CDKN2C), transcript variant 2, mRNA [NM_078626]	70.9799	0.0007117	oncogene	metastasis	Ashida S, Nakagawa H, Katagiri T, Furihata M, Iiizumi M, Anazawa Y, Tsunoda T, Takata R, Kasahara K, Miki T, Fujioka T, Shuin T, Nakamura Y.Molecular features of the transition from prostatic intraepithelial neoplasia (PIN) to prostate cancer: genome-wide gene-expression profiles of prostate cancers and PINs.Cancer Res. 2004;64(17):5963-72.			CDKN2C
DAAM2	NM_015345	Homo sapiens dishevelled associated activator of morphogenesis 2 (DAAM2), mRNA [NM_015345]	5.3117	2.01969e-06	oncogene	metastasis	Katoh Y, Katoh M.Comparative integromics on FAT1, FAT2, FAT3 and FAT4.Int J Mol Med. 2006;18(3):523-8.			DAAM2
DDC	NM_000790	Homo sapiens dopa decarboxylase (aromatic L-amino acid decarboxylase) (DDC), mRNA [NM_000790]	317.12	7.8657e-06	oncogene	metastasis	Träger C, Vernby A, Kullman A, Ora I, Kogner P, Kågedal B.mRNAs of tyrosine hydroxylase and dopa decarboxylase but not of GD2 synthase are specific for neuroblastoma minimal disease and predicts outcome for children with high-risk disease when measured at diagnosis.Int J Cancer. 2008;123(12):2849-2855.			DDC
DDR2	BX537651	Homo sapiens mRNA; cDNA DKFZp686C0390 (from clone DKFZp686C0390). [BX537651]	19.3245	1.2569e-05	oncogene	metastasis	Chua HH, Yeh TH, Wang YP, Huang YT, Sheen TS, Lo YC, Chou YC, Tsai CH.Upregulation of discoidin domain receptor 2 in nasopharyngeal carcinoma.Head Neck. 2008;30(4):427-36.			DDR2
ELMO1	NM_014800	Homo sapiens engulfment and cell motility 1 (ELMO1), transcript variant 1, mRNA [NM_014800]	7.16385	0.000126376	oncogene	metastasis	Jarzynka MJ, Hu B, Hui KM, Bar-Joseph I, Gu W, Hirose T, Haney LB, Ravichandran KS, Nishikawa R, Cheng SY.ELMO1 and Dock180, a bipartite Rac1 guanine nucleotide exchange factor, promote human glioma cell invasion.Cancer Res. 2007;67(15):7203-11.			ELMO1
ENO3	NM_001976	Homo sapiens enolase 3 (beta, muscle) (ENO3), transcript variant 1, mRNA [NM_001976]	5.87449	6.06965e-05	oncogene	metastasis	Li JL, Fei Q, Yu J, Zhang HY, Wang P, Zhu JD.Correlation between methylation profile of promoter cpg islands of seven metastasis-associated genes and their expression states in six cell lines of liver origin. Ai Zheng. 2004;23(9):985-91.			ENO3
ETV4	NM_001079675	Homo sapiens ets variant gene 4 (E1A enhancer binding protein, E1AF) (ETV4), transcript variant 2, mRNA [NM_001079675]	4.4042	0.00030494	oncogene	metastasis	Hata H, Kitamura T, Higashino F, Hida K, Yoshida K, Ohiro Y, Totsuka Y, Kitagawa Y, Shindoh M.Expression of E1AF, an ets-oncogene transcription factor, highly correlates with malignant phenotype of malignant melanoma through up-regulation of the membrane-type-1 matrix metalloproteinase gene.Oncol Rep. 2008;19(5):1093-8.			ETV4
EZH2	NM_004456	Homo sapiens enhancer of zeste homolog 2 (Drosophila) (EZH2), transcript variant 1, mRNA [NM_004456]	4.63919	3.58085e-05	oncogene	metastasis	Cao Q, Yu J, Dhanasekaran SM, Kim JH, Mani RS, Tomlins SA, Mehra R, Laxman B, Cao X, Yu J, Kleer CG, Varambally S, Chinnaiyan AM.Repression of E-cadherin by the polycomb group protein EZH2 in cancer.Oncogene. 2008. [Epub ahead of print]			EZH2
FUS	NM_004960	Homo sapiens fusion (involved in t(12;16) in malignant liposarcoma) (FUS), transcript variant 1, mRNA [NM_004960]	3.96716	0.000254659	oncogene	metastasis	Oue N, Hamai Y, Mitani Y, Matsumura S, Oshimo Y, Aung PP, Kuraoka K, Nakayama H, Yasui W.Gene expression profile of gastric carcinoma: identification of genes and tags potentially involved in invasion, metastasis, and carcinogenesis by serial analysis of gene expression.Cancer Res. 2004;64(7):2397-405.			FUS
GPR30	NM_001039966	Homo sapiens G protein-coupled receptor 30 (GPR30), transcript variant 3, mRNA [NM_001039966]	20.0616	0.000487185	oncogene	metastasis	Filardo EJ, Quinn JA, Sabo E.Association of the membrane estrogen receptor, GPR30, with breast tumor metastasis and transactivation of the epidermal growth factor receptor. Steroids. 2008;73(9-10):870-3.			GPR30
HGF	ENST00000222390	Hepatocyte growth factor precursor (Scatter factor) (SF) (Hepatopoeitin A) [Contains: Hepatocyte growth factor alpha chain; Hepatocyte growth factor beta chain]. [Source:Uniprot/SWISSPROT;Acc:P14210] [ENST00000222390]	100.08	5.8344e-07	oncogene	metastasis	Ahmed T, Shea K, Masters JR, Jones GE, Wells CM.A PAK4-LIMK1 pathway drives prostate cancer cell migration downstream of HGF.Cell Signal. 2008;20(7):1320-8.			HGF
IGFBP2	NM_000597	Homo sapiens insulin-like growth factor binding protein 2, 36kDa (IGFBP2), mRNA [NM_000597]	306.153	8.46011e-07	oncogene	metastasis	Wang H, Arun BK, Wang H, Fuller GN, Zhang W, Middleton LP, Sahin AA. IGFBP2 and IGFBP5 overexpression correlates with the lymph node metastasis in T1 breast carcinomas.Breast J. 2008;14(3):261-7.			IGFBP2
IGFBP5	NM_000599	Homo sapiens insulin-like growth factor binding protein 5 (IGFBP5), mRNA [NM_000599]	13.3874	0.000145239	oncogene	metastasis	Wang H, Arun BK, Wang H, Fuller GN, Zhang W, Middleton LP, Sahin AA. IGFBP2 and IGFBP5 overexpression correlates with the lymph node metastasis in T1 breast carcinomas.Breast J. 2008;14(3):261-7.			IGFBP5
LRP4	NM_002334	Homo sapiens low density lipoprotein receptor-related protein 4 (LRP4), mRNA [NM_002334]	12.6442	0.00081281	oncogene	metastasis	Hucz J, Kowalska M, Jarząb M, Wiench M.Gene expression of metalloproteinase 11, claudin 1 and selected adhesion related genes in papillary thyroid cancer.Endokrynol Pol. 2006;57(Suppl A):18-25.			LRP4
NKD2	NM_033120	Homo sapiens naked cuticle homolog 2 (Drosophila) (NKD2), mRNA [NM_033120]	3.60353	1.92642e-05	oncogene	metastasis	Katoh Y, Katoh M.Comparative integromics on FAT1, FAT2, FAT3 and FAT4.Int J Mol Med. 2006;18(3):523-8.			NKD2
NPY	NM_000905	Homo sapiens neuropeptide Y (NPY), mRNA [NM_000905]	889.333	5.04566e-08	oncogene	metastasis	de Jong M, Kwekkeboom D, Valkema R, Krenning EP.Radiolabelled peptides for tumour therapy: current status and future directions. Plenary lecture at the EANM 2002.Eur J Nucl Med Mol Imaging. 2003;30(3):463-9			NPY
OCA2	NM_000275	Homo sapiens oculocutaneous albinism II (pink-eye dilution homolog, mouse) (OCA2), mRNA [NM_000275]	5.38513	9.15548e-05	oncogene	metastasis	Ryu B, Kim DS, Deluca AM, Alani RM.Comprehensive expression profiling of tumor cell lines identifies molecular signatures of melanoma progression.PLoS ONE. 2007;2(7):e594.			OCA2
PDGFRA	NM_006206	Homo sapiens platelet-derived growth factor receptor, alpha polypeptide (PDGFRA), mRNA [NM_006206]	53.6626	9.43726e-07	oncogene	metastasis	Russell MR, Jamieson WL, Dolloff NG, Fatatis A.The alpha-receptor for platelet-derived growth factor as a target for antibody-mediated inhibition of skeletal metastases from prostate cancer cells.Oncogene. 2008. [Epub ahead of print]			PDGFRA
PDGFRB	NM_002609	Homo sapiens platelet-derived growth factor receptor, beta polypeptide (PDGFRB), mRNA [NM_002609]	97.6669	2.08274e-05	oncogene	metastasis	Gilbertson RJ, Clifford SC.PDGFRB is overexpressed in metastatic medulloblastoma.Nat Genet. 2003;35(3):197-8.			PDGFRB
PRAME	NM_206956	Homo sapiens preferentially expressed antigen in melanoma (PRAME), transcript variant 5, mRNA [NM_206956]	637.295	1.14357e-05	oncogene	metastasis	Epping MT, Hart AA, Glas AM, Krijgsman O, Bernards R.PRAME expression and clinical outcome of breast cancer.Br J Cancer. 2008;99(3):398-403.			PRAME
PROX1	NM_002763	Homo sapiens prospero-related homeobox 1 (PROX1), mRNA [NM_002763]	9.19821	2.76111e-05	oncogene	metastasis	Dadras SS, Skrzypek A, Nguyen L, Shin JW, Schulz MM, Arbiser J, Mihm MC, Detmar M. Prox-1 Promotes Invasion of Kaposiform Hemangioendotheliomas.J Invest Dermatol. 2008. [Epub ahead of print]			PROX1
RET	NM_020630	Homo sapiens ret proto-oncogene (multiple endocrine neoplasia and medullary thyroid carcinoma 1, Hirschsprung disease) (RET), transcript variant 4, mRNA [NM_020630]	24.3492	1.16446e-06	oncogene	metastasis	Zeng Q, Cheng Y, Zhu Q, Yu Z, Wu X, Huang K, Zhou M, Han S, Zhang Q.The relationship between overexpression of glial cell-derived neurotrophic factor and its RET receptor with progression and prognosis of human pancreatic cancer.J Int Med Res. 2008;36(4):656-64.			RET
SEMA3C	NM_006379	Homo sapiens sema domain, immunoglobulin domain (Ig), short basic domain, secreted, (semaphorin) 3C (SEMA3C), mRNA [NM_006379]	4.75411	0.00012001	oncogene	metastasis	Herman JG, Meadows GG.Increased class 3 semaphorin expression modulates the invasive and adhesive properties of prostate cancer cells.Int J Oncol. 2007;30(5):1231-8.			SEMA3C
SNAI1	NM_005985	Homo sapiens snail homolog 1 (Drosophila) (SNAI1), mRNA [NM_005985]	32.9719	3.02606e-06	oncogene	metastasis	Olmeda D, Montes A, Moreno-Bueno G, Flores JM, Portillo F, Cano A.Snai1 and Snai2 collaborate on tumor growth and metastasis properties of mouse skin carcinoma cell lines.Oncogene. 2008;27(34):4690-701.			SNAI1
THBS3	NM_007112	Homo sapiens thrombospondin 3 (THBS3), mRNA [NM_007112]	3.82476	0.00219624	oncogene	metastasis	Dalla-Torre CA, Yoshimoto M, Lee CH, Joshua AM, de Toledo SR, Petrilli AS, Andrade JA, Chilton-MacNeill S, Zielenska M, Squire JA.Effects of THBS3, SPARC and SPP1 expression on biological behavior and survival in patients with osteosarcoma.MC Cancer. 2006;6:237.			THBS3
TTYH2	NM_032646	Homo sapiens tweety homolog 2 (Drosophila) (TTYH2), transcript variant 1, mRNA [NM_032646]	3.4784	0.000204107	oncogene	metastasis	Toiyama Y, Mizoguchi A, Kimura K, Hiro J, Inoue Y, Tutumi T, Miki C, Kusunoki M.TTYH2, a human homologue of the Drosophila melanogaster gene tweety, is up-regulated in colon carcinoma and involved in cell proliferation and cell aggregation.World J Gastroenterol. 2007;13(19):2717-21.			TTYH2
TWIST1	NM_000474	Homo sapiens twist homolog 1 (acrocephalosyndactyly 3; Saethre-Chotzen syndrome) (Drosophila) (TWIST1), mRNA [NM_000474]	373.496	1.06657e-06	oncogene	metastasis	Yin X, Dewille JW, Hai T.A potential dichotomous role of ATF3, an adaptive-response gene, in cancer development.Oncogene. 2008;27(15):2118-27.			TWIST1
WNT6	NM_006522	Homo sapiens wingless-type MMTV integration site family, member 6 (WNT6), mRNA [NM_006522]	30.1087	9.26345e-06	oncogenes	metastasis	Krawetz R, Kelly GM.Wnt6 induces the specification and epithelialization of F9 embryonal carcinoma cells to primitive endoderm.Cell Signal. 2008;20(3):506-17.			WNT6
Group3 epigenetic repressed genes in PC3 cells-1											Epigenetic modification
Gene symbol	Accession number	Description	PC3/EP156T Fold change	p-value	Function	mechanism	References				EP156T	PC3
ANXA1	NM_000700	Homo sapiens annexin A1 (ANXA1), mRNA [NM_000700]	-247.554	1.506e-08	suppressor	carcinogenesis	Cao Y, Li Y, Edelweiss M, Arun B, Rosen D, Resetkova E, Wu Y, Liu J, Sahin A, Albarracin CT.Loss of Annexin A1 Expression in Breast Cancer Progression.Appl Immunohistochem Mol Morphol. 2008. [Epub ahead of print]			ANXA1					H3K4me3
APOL6	NM_030641	Homo sapiens apolipoprotein L, 6 (APOL6), mRNA [NM_030641]	-16.7313	0.00220822	suppressor	carcinogenesis	Liu Z, Lu H, Jiang Z, Pastuszyn A, Hu CA.Apolipoprotein l6, a novel proapoptotic Bcl-2 homology 3-only protein, induces mitochondria-mediated apoptosis in cancer cells.Mol Cancer Res. 2005;3(1):21-31.			APOL6					H3K4K27me3
BARX2	NM_003658	Homo sapiens BarH-like homeobox 2 (BARX2), mRNA [NM_003658]	-3.8208	0.000114712	suppressor	carcinogenesis	Stevens TA, Meech R.BARX2 and estrogen receptor-alpha (ESR1) coordinately regulate the production of alternatively spliced ESR1 isoforms and control breast cancer cell growth and invasion.Oncogene. 2006;25(39):5426-35.			BARX2					Neither
BIK	NM_001197	Homo sapiens BCL2-interacting killer (apoptosis-inducing) (BIK), mRNA [NM_001197]	-53.4497	1.81743e-06	suppressor	carcinogenesis	Zhao X, Wang L, Sun Y, Ye L, Lu J, Yuan Y, Qian G, Ge S.The endoplasmic reticulum (ER)-target protein Bik induces Hep3B cells apoptosis by the depletion of the ER Ca2+ stores.Mol Cell Biochem. 2008;312(1-2):33-8.			BIK					H3K27me3
BOK	NM_032515	Homo sapiens BCL2-related ovarian killer (BOK), mRNA [NM_032515]	-5.72584	1.80879e-05	suppressor	carcinogenesis	Yakovlev AG, Di Giovanni S, Wang G, Liu W, Stoica B, Faden AI.BOK and NOXA are essential mediators of p53-dependent apoptosis.J Biol Chem. 2004;279(27):28367-74.			BOK
CASP4	NM_033306	Homo sapiens caspase 4, apoptosis-related cysteine peptidase (CASP4), transcript variant gamma, mRNA [NM_033306]	-21.1752	2.48555e-05	suppressor	carcinogenesis	Wang X, Narayanan M, Bruey JM, Rigamonti D, Cattaneo E, Reed JC, Friedlander RM.Protective role of Cop in Rip2/caspase-1/caspase-4-mediated HeLa cell death.Biochim Biophys Acta. 2006;1762(8):742-54.			CASP4
CEACAM1	NM_001712	Homo sapiens carcinoembryonic antigen-related cell adhesion molecule 1 (biliary glycoprotein) (CEACAM1), transcript variant 1, mRNA [NM_001712]	-159.274	0.000252042	suppressor	carcinogenesis	Dango S, Sienel W, Schreiber M, Stremmel C, Kirschbaum A, Pantel K, Passlick B.Elevated expression of carcinoembryonic antigen-related cell adhesion molecule 1 (CEACAM-1) is associated with increased angiogenic potential in non-small-cell lung cancer.Lung Cancer. 2008;60(3):426-33.			CEACAM1
CEBPA	NM_004364	Homo sapiens CCAAT/enhancer binding protein (C/EBP), alpha (CEBPA), mRNA [NM_004364]	-5.05278	9.37138e-05	suppressor	carcinogenesis	Gombart AF, Hofmann WK, Kawano S, Takeuchi S, Krug U, Kwok SH, Larsen RJ, Asou H, Miller CW, Hoelzer D, Koeffler HP. Mutations in the gene encoding the transcription factor CCAAT/enhancer binding protein alpha in myelodysplastic syndromes and acute myeloid leukemias.Blood. 2002;99(4):1332-40.			CEBPA
DAB2	NM_001343	Homo sapiens disabled homolog 2, mitogen-responsive phosphoprotein (Drosophila) (DAB2), mRNA [NM_001343]	-10.0566	0.000342195	suppressor	carcinogenesis	Karam JA, Shariat SF, Huang HY, Pong RC, Ashfaq R, Shapiro E, Lotan Y, Sagalowsky AI, Wu XR, Hsieh JT.Decreased DOC-2/DAB2 expression in urothelial carcinoma of the bladder.Clin Cancer Res. 2007;13(15 Pt 1):4400-6.			DAB2
EDN1	NM_001955	Homo sapiens endothelin 1 (EDN1), mRNA [NM_001955]	-12.3962	0.00199821	suppressor	carcinogenesis	Kim TH, Xiong H, Zhang Z, Ren B.beta-Catenin activates the growth factor endothelin-1 in colon cancer cells.Oncogene. 2005;24(4):597-604.			EDN1
FBN2	NM_001999	Homo sapiens fibrillin 2 (congenital contractural arachnodactyly) (FBN2), mRNA [NM_001999]	-16.6532	0.0101817	suppressor	carcinogenesis	Chen H, Suzuki M, Nakamura Y, Ohira M, Ando S, Iida T, Nakajima T, Nakagawara A, Kimura H.Aberrant methylation of FBN2 in human non-small cell lung cancer.Lung Cancer. 2005;50(1):43-9.			FBN2
GLIPR1	NM_006851	Homo sapiens GLI pathogenesis-related 1 (glioma) (GLIPR1), mRNA [NM_006851]	-17.087	0.000937673	suppressor	carcinogenesis	Chilukamarri L, Hancock AL, Malik S, Zabkiewicz J, Baker JA, Greenhough A, Dallosso AR, Huang TH, Royer-Pokora B, Brown KW, Malik K.Hypomethylation and aberrant expression of the glioma pathogenesis-related 1 gene in Wilms tumors.Neoplasia. 2007;9(11):970-8.			GLIPR1
HOXA4	NM_002141	Homo sapiens homeobox A4 (HOXA4), mRNA [NM_002141]	-8.58182	2.80485e-05	suppressor	carcinogenesis	Toiyama Y, Mizoguchi A, Kimura K, Araki T, Yoshiyama S, Sakaguchi K, Miki C, Kusunoki M.Persistence of gene expression changes in noninflamed and inflamed colonic mucosa in ulcerative colitis and their presence in colonic carcinoma.World J Gastroenterol. 2005;11(33):5151-5.			HOXA4
IFI16	NM_005531	Homo sapiens interferon, gamma-inducible protein 16 (IFI16), mRNA [NM_005531]	-246.25	1.22632e-06	suppressor	carcinogenesis	De Andrea M, Gioia D, Mondini M, Azzimonti B, Renò F, Pecorari G, Landolfo V, Tommasino M, Accardi R, Herold-Mende C, Landolfo S, Gariglio M.Effects of IFI16 overexpression on the growth and doxorubicin sensitivity of head and neck squamous cell carcinoma-derived cell lines.Head Neck. 2007;29(9):835-44.			IFI16
IGFBP7	NM_001553	Homo sapiens insulin-like growth factor binding protein 7 (IGFBP7), mRNA [NM_001553]	-515.394	4.5079e-08	suppressor	carcinogenesis	Ruan W, Xu E, Xu F, Ma Y, Deng H, Huang Q, Lv B, Hu H, Lin J, Cui J, Di M, Dong J, Lai M.IGFBP7 plays a potential tumor suppressor role in colorectal carcinogenesis.Cancer Biol Ther. 2007;6(3):354-9.			IGFBP7
KCTD11	NM_001002914	Homo sapiens potassium channel tetramerisation domain containing 11 (KCTD11), mRNA [NM_001002914]	-5.36194	0.00197058	suppressor	carcinogenesis	Zawlik I, Zakrzewska M, Witusik M, Golanska E, Kulczycka-Wojdala D, Szybka M, Piaskowski S, Wozniak K, Zakrzewski K, Papierz W, Liberski PP, Rieske P.KCTD11 expression in medulloblastoma is lower than in adult cerebellum and higher than in neural stem cells.Cancer Genet Cytogenet. 2006;170(1):24-8.			KCTD11
KLF6	NM_001300	Homo sapiens Kruppel-like factor 6 (KLF6), transcript variant 2, mRNA [NM_001300]	-5.25553	0.000193507	suppressor	carcinogenesis	Solé X, Hernández P, de Heredia ML, Armengol L, Rodríguez-Santiago B, Gómez L, Maxwell CA, Aguiló F, Condom E, Abril J, Pérez-Jurado L, Estivill X, Nunes V, Capellá G, Gruber SB, Moreno V, Pujana MA.Genetic and genomic analysis modeling of germline c-MYC overexpression and cancer susceptibility.BMC Genomics. 2008;9:12.			KLF6
MICB	NM_005931	Homo sapiens MHC class I polypeptide-related sequence B (MICB), mRNA [NM_005931]	-16.1403	2.19502e-05	suppressor	carcinogenesis	Rodríguez-Rodero S, González S, Rodrigo L, Fernández-Morera JL, Martínez-Borra J, López-Vázquez A, López-Larrea C.Transcriptional regulation of MICA and MICB: a novel polymorphism in MICB promoter alters transcriptional regulation by Sp1.Eur J Immunol. 2007;37(7):1938-53.			MICB
MX1	NM_002462	Homo sapiens myxovirus (influenza virus) resistance 1, interferon-inducible protein p78 (mouse) (MX1), mRNA [NM_002462]	-107.633	0.00890271	suppressor	carcinogenesis	Lu DD, Chen YC, Zhang XR, Cao XR, Jiang HY, Yao L.The relationship between metallothionein-1F (MT1F) gene and hepatocellular carcinoma.Yale J Biol Med. 2003;76(2):55-62.			MX1
PAX8	NM_003466	Homo sapiens paired box gene 8 (PAX8), transcript variant PAX8A, mRNA [NM_003466]	-57.8707	8.55027e-07	suppressor	carcinogenesis	Béland M, Bouchard M. PAX gene function during kidney tumorigenesis: a comparative approach.Bull Cancer. 2006;93(9):875-82.			PAX8
PLSCR1	NM_021105	Homo sapiens phospholipid scramblase 1 (PLSCR1), mRNA [NM_021105]	-44.8108	0.000584991	suppressor	carcinogenesis	Silverman RH, Halloum A, Zhou A, Dong B, Al-Zoghaibi F, Kushner D, Zhou Q, Zhao J, Wiedmer T, Sims PJ.Suppression of ovarian carcinoma cell growth in vivo by the interferon-inducible plasma membrane protein, phospholipid scramblase 1.Cancer Res. 2002;62(2):397-402.			PLSCR1
PRKCDBP	NM_145040	Homo sapiens protein kinase C, delta binding protein (PRKCDBP), mRNA [NM_145040]	-410.007	4.55062e-06	suppressor	carcinogenesis	Lee JH, Byun DS, Lee MG, Ryu BK, Kang MJ, Chae KS, Lee KY, Kim HJ, Park H, Chi SG.Frequent epigenetic inactivation of hSRBC in gastric cancer and its implication in attenuated p53 response to stresses.Int J Cancer. 2008;122(7):1573-84.			PRKCDBP
RASSF6	NM_201431	Homo sapiens Ras association (RalGDS/AF-6) domain family 6 (RASSF6), transcript variant 2, mRNA [NM_201431]	-5.61352	0.00480958	suppressor	carcinogenesis	Ikeda M, Hirabayashi S, Fujiwara N, Mori H, Kawata A, Iida J, Bao Y, Sato Y, Iida T, Sugimura H, Hata Y.Ras-association domain family protein 6 induces apoptosis via both caspase-dependent and caspase-independent pathways.Exp Cell Res. 2007;313(7):1484-95.			RASSF6
RIPK3	NM_006871	Homo sapiens receptor-interacting serine-threonine kinase 3 (RIPK3), mRNA [NM_006871]	-5.82657	0.00121893	suppressor	carcinogenesis	Yang Y, Hu W, Feng S, Ma J, Wu M.RIP3 beta and RIP3 gamma, two novel splice variants of receptor-interacting protein 3 (RIP3), downregulate RIP3-induced apoptosis.Biochem Biophys Res Commun. 2005;332(1):181-7.			RIPK3
RNF11	NM_014372	Homo sapiens ring finger protein 11 (RNF11), mRNA [NM_014372]	-4.18123	0.00125707	suppressor	carcinogenesis	Burger A, Amemiya Y, Kitching R, Seth AK.Novel RING E3 ubiquitin ligases in breast cancer.Neoplasia. 2006;8(8):689-95.			RNF11
SOX7	NM_031439	Homo sapiens SRY (sex determining region Y)-box 7 (SOX7), mRNA [NM_031439]	-7.7546	0.00191031	suppressor	carcinogenesis	Guo L, Zhong D, Lau S, Liu X, Dong XY, Sun X, Yang VW, Vertino PM, Moreno CS, Varma V, Dong JT, Zhou W.Sox7 Is an independent checkpoint for beta-catenin function in prostate and colon epithelial cells.Mol Cancer Res. 2008;6(9):1421-30.			SOX7
SPRR3	NM_005416	Homo sapiens small proline-rich protein 3 (SPRR3), mRNA [NM_005416]	-14.1393	0.0014704	suppressor	carcinogenesis	Zhang Y, Feng YB, Shen XM, Chen BS, Du XL, Luo ML, Cai Y, Han YL, Xu X, Zhan QM, Wang MR.Exogenous expression of Esophagin/SPRR3 attenuates the tumorigenicity of esophageal squamous cell carcinoma cells via promoting apoptosis.Int J Cancer. 2008;122(2):260-6.			SPRR3
TNFSF10	NM_003810	Homo sapiens tumor necrosis factor (ligand) superfamily, member 10 (TNFSF10), mRNA [NM_003810]	-30.0595	0.00189389	supperssor	carcinogenesis	Hellwig CT, Kohler BF, Lehtivarjo AK, Dussmann H, Courtney MJ, Prehn JH, Rehm M.Real time analysis of tumor necrosis factor-related apoptosis-inducing ligand/cycloheximide-induced caspase activities during apoptosis initiation.J Biol Chem. 2008;283(31):21676-85.			TNFSF10
YAP1	NM_006106	Homo sapiens Yes-associated protein 1, 65kDa (YAP1), mRNA [NM_006106]	-4.68429	0.000721073	suppressor	carcinogenesis	Huang ME, Rio AG, Nicolas A, Kolodner RD.A genomewide screen in Saccharomyces cerevisiae for genes that suppress the accumulation of mutations.Proc Natl Acad Sci U S A. 2003;100(20):11529-34.			YAP1
Group4 epigenetic repressed genes in PC3 cells-2											Epigenetic modification
Gene symbol	Accession number	Description	PC3/EP156T Fold change	p-value	Function	mechanism	References				EP156T	PC3
ABCA1	NM_005502	Homo sapiens ATP-binding cassette, sub-family A (ABC1), member 1 (ABCA1), mRNA [NM_005502]	-37.093	1.29252e-05	suppressor	metastasis	Fukuchi J, Hiipakka RA, Kokontis JM, Hsu S, Ko AL, Fitzgerald ML, Liao S.Androgenic suppression of ATP-binding cassette transporter A1 expression in LNCaP human prostate cancer cells.Cancer Res. 2004;64(21):7682-5.			ABCA1					H3K4me3
CA12	NM_001218	Homo sapiens carbonic anhydrase XII (CA12), transcript variant 1, mRNA [NM_001218]	-11.4524	0.00342983	suppressor	metastasis	Kim JY, Shin HJ, Kim TH, Cho KH, Shin KH, Kim BK, Roh JW, Lee S, Park SY, Hwang YJ, Han IO.Tumor-associated carbonic anhydrases are linked to metastases in primary cervical cancer.J Cancer Res Clin Oncol. 2006;132(5):302-8.			CA12					H3K4K27me3
CD82	NM_002231	Homo sapiens CD82 molecule (CD82), transcript variant 1, mRNA [NM_002231]	-20.4724	0.000842811	suppressor	metastasis	Miranti CK.Controlling cell surface dynamics and signaling: How CD82/KAI1 suppresses metastasis.Cell Signal. 2008. [Epub ahead of print]			CD82					Neither
CDH13	NM_001257	Homo sapiens cadherin 13, H-cadherin (heart) (CDH13), mRNA [NM_001257]	-111.682	1.79613e-05	suppressor	metastasis	Maruyama R, Toyooka S, Toyooka KO, Virmani AK, Zöchbauer-Müller S, Farinas AJ, Minna JD, McConnell J, Frenkel EP, Gazdar AF.Aberrant promoter methylation profile of prostate cancers and its relationship to clinicopathological features.Clin Cancer Res. 2002;8(2):514-9.			CDH13					H3K27me3
CLCA2	NM_006536	Homo sapiens chloride channel, calcium activated, family member 2 (CLCA2), mRNA [NM_006536]	-73.0868	1.31922e-05	suppressor	metastasis	Gruber AD, Pauli BU.Tumorigenicity of human breast cancer is associated with loss of the Ca2+-activated chloride channel CLCA2.Cancer Res. 1999;59(21):5488-91.			CLCA2
CLDN1	NM_021101	Homo sapiens claudin 1 (CLDN1), mRNA [NM_021101]	-71.0151	0.000115965	suppressor	metastasis	Chao YC, Pan SH, Yang SC, Yu SL, Che TF, Lin CW, Tsai MS, Chang GC, Wu CH, Wu YY, Lee YC, Hong TM, Yang PC.Claudin-1 is a Metastasis Suppressor and Correlates with Clinical Outcome in Lung Adenocarcinoma.Am J Respir Crit Care Med. 2008. [Epub ahead of print]			CLDN1
COL4A5	NM_033380	Homo sapiens collagen, type IV, alpha 5 (Alport syndrome) (COL4A5), transcript variant 2, mRNA [NM_033380]	-36.0543	3.61371e-06	suppressor	metastasis	Ikeda K, Iyama K, Ishikawa N, Egami H, Nakao M, Sado Y, Ninomiya Y, Baba H.Loss of expression of type IV collagen alpha5 and alpha6 chains in colorectal cancer associated with the hypermethylation of their promoter region.Am J Pathol. 2006 Mar;168(3):856-65.			COL4A5
COL4A6	NM_033641	Homo sapiens collagen, type IV, alpha 6 (COL4A6), transcript variant B, mRNA [NM_033641]	-33.5502	4.84165e-06	suppressor	metastasis	Ikeda K, Iyama K, Ishikawa N, Egami H, Nakao M, Sado Y, Ninomiya Y, Baba H.Loss of expression of type IV collagen alpha5 and alpha6 chains in colorectal cancer associated with the hypermethylation of their promoter region.Am J Pathol. 2006 Mar;168(3):856-65.			COL4A6
CRB3	NM_174881	Homo sapiens crumbs homolog 3 (Drosophila) (CRB3), transcript variant 3, mRNA [NM_174881]	-59.9349	0.00062665	suppressor	metastasis	Karp CM, Tan TT, Mathew R, Nelson D, Mukherjee C, Degenhardt K, Karantza-Wadsworth V, White E.Role of the polarity determinant crumbs in suppressing mammalian epithelial tumor progression.Cancer Res. 2008;68(11):4105-15.			CRB3
CTGF	NM_001901	Homo sapiens connective tissue growth factor (CTGF), mRNA [NM_001901]	-10.6519	0.00110215	suppressor	metastasis	Chao YC, Pan SH, Yang SC, Yu SL, Che TF, Lin CW, Tsai MS, Chang GC, Wu CH, Wu YY, Lee YC, Hong TM, Yang PC.Claudin-1 is a Metastasis Suppressor and Correlates with Clinical Outcome in Lung Adenocarcinoma.Am J Respir Crit Care Med. 2008. [Epub ahead of print]			CTGF
CYP27B1	NM_000785	Homo sapiens cytochrome P450, family 27, subfamily B, polypeptide 1 (CYP27B1), nuclear gene encoding mitochondrial protein, mRNA [NM_000785]	-4.3127	7.83212e-05	suppressor	metastasis	Matusiak D, Benya RV.CYP27A1 and CYP24 expression as a function of malignant transformation in the colon.J Histochem Cytochem. 2007;55(12):1257-64.			CYP27B1
DCBLD2	NM_080927	Homo sapiens discoidin, CUB and LCCL domain containing 2 (DCBLD2), mRNA [NM_080927]	-3.44223	0.0105452	suppressor	metastasis	Kim M, Lee KT, Jang HR, Kim JH, Noh SM, Song KS, Cho JS, Jeong HY, Kim SY, Yoo HS, Kim YS.Epigenetic down-regulation and suppressive role of DCBLD2 in gastric cancer cell proliferation and invasion.Mol Cancer Res. 2008;6(2):222-30.			DCBLD2
DSC3	NM_024423	Homo sapiens desmocollin 3 (DSC3), transcript variant Dsc3b, mRNA [NM_024423]	-36.2765	4.76336e-07	suppressor	metastasis	Wang L, Liu T, Wang Y, Cao L, Nishioka M, Aguirre RL, Ishikawa A, Geng L, Okada N.Altered expression of desmocollin 3, desmoglein 3, and beta-catenin in oral squamous cell carcinoma: correlation with lymph node metastasis and cell proliferation.Virchows Arch. 2007;451(5):959-66.			DSC3
DUOX1	NM_017434	Homo sapiens dual oxidase 1 (DUOX1), transcript variant 1, mRNA [NM_017434]	-38.3338	3.29921e-06	suppressor	metastasis	Luxen S, Belinsky SA, Knaus UG.Silencing of DUOX NADPH oxidases by promoter hypermethylation in lung cancer.Cancer Res. 2008;68(4):1037-45.			DUOX1
EGR1	NM_001964	Homo sapiens early growth response 1 (EGR1), mRNA [NM_001964]	-3.81147	0.0102381	suppressor	metastasis	Barbolina MV, Adley BP, Ariztia EV, Liu Y, Stack MS.Microenvironmental regulation of membrane type 1 matrix metalloproteinase activity in ovarian carcinoma cells via collagen-induced EGR1 expression.J Biol Chem. 2007;282(7):4924-31.			EGR1
HSD17B2	NM_002153	Homo sapiens hydroxysteroid (17-beta) dehydrogenase 2 (HSD17B2), mRNA [NM_002153]	-129.324	8.44562e-06	suppressor	metastasis	Elo JP, Härkönen P, Kyllönen AP, Lukkarinen O, Poutanen M, Vihko R, Vihko P.Loss of heterozygosity at 16q24.1-q24.2 is significantly associated with metastatic and aggressive behavior of prostate cancer.Cancer Res. 1997;57(16):3356-9.			HSD17B2
IFIT2	NM_001547	Homo sapiens interferon-induced protein with tetratricopeptide repeats 2 (IFIT2), mRNA [NM_001547]	-15.1095	0.0106698	suppressor	metastasis	Lai KC, Chang KW, Liu CJ, Kao SY, Lee TC.IFN-induced protein with tetratricopeptide repeats 2 inhibits migration activity and increases survival of oral squamous cell carcinoma.Mol Cancer Res. 2008;6(9):1431-9.			IFIT2
IRF6	NM_006147	Homo sapiens interferon regulatory factor 6 (IRF6), mRNA [NM_006147]	-13.3266	4.8169e-05	suppressor	metastasis	Bailey CM, Khalkhali-Ellis Z, Kondo S, Margaryan NV, Seftor RE, Wheaton WW, Amir S, Pins MR, Schutte BC, Hendrix MJ.Mammary serine protease inhibitor (Maspin) binds directly to interferon regulatory factor 6: identification of a novel serpin partnership.J Biol Chem. 2005;280(40):34210-7.			IRF6
IRS1	NM_005544	Homo sapiens insulin receptor substrate 1 (IRS1), mRNA [NM_005544]	-5.49488	0.00361016	suppressor	metastasis	Ma Z, Gibson SL, Byrne MA, Zhang J, White MF, Shaw LM.Suppression of insulin receptor substrate 1 (IRS-1) promotes mammary tumor metastasis.Mol Cell Biol. 2006;26(24):9338-51.			IRS1
KLF4	NM_004235	Homo sapiens Kruppel-like factor 4 (gut) (KLF4), mRNA [NM_004235]	-46.9021	4.0342e-05	suppressor	metastasis	Wei D, Kanai M, Jia Z, Le X, Xie K.Kruppel-like factor 4 induces p27Kip1 expression in and suppresses the growth and metastasis of human pancreatic cancer cells.Cancer Res. 2008;68(12):4631-9.			KLF4
KLK5	NM_012427	Homo sapiens kallikrein-related peptidase 5 (KLK5), transcript variant 1, mRNA [NM_012427]	-228.534	0.000156009	suppressor	metastasis	Shinoda Y, Kozaki K, Imoto I, Obara W, Tsuda H, Mizutani Y, Shuin T, Fujioka T, Miki T, Inazawa J.Association of KLK5 overexpression with invasiveness of urinary bladder carcinoma cells.Cancer Sci. 2007;98(7):1078-86.			KLK5
KLK8	NM_144505	Homo sapiens kallikrein-related peptidase 8 (KLK8), transcript variant 2, mRNA [NM_144505]	-475.32	4.18942e-05	suppressor	metastasis	Sher YP, Chou CC, Chou RH, Wu HM, Wayne Chang WS, Chen CH, Yang PC, Wu CW, Yu CL, Peck K.Human kallikrein 8 protease confers a favorable clinical outcome in non-small cell lung cancer by suppressing tumor cell invasiveness.Cancer Res. 2006;66(24):11763-70.			KLK8
LAMA3	NM_198129	Homo sapiens laminin, alpha 3 (LAMA3), transcript variant 1, mRNA [NM_198129]	-488.643	5.5653e-08	suppressor	metastasis	Snijders AM, Schmidt BL, Fridlyand J, Dekker N, Pinkel D, Jordan RC, Albertson DG.Rare amplicons implicate frequent deregulation of cell fate specification pathways in oral squamous cell carcinoma.Oncogene. 2005;24(26):4232-42.			LAMA3
LATS2	NM_014572	Homo sapiens LATS, large tumor suppressor, homolog 2 (Drosophila) (LATS2), mRNA [NM_014572]	-11.4016	2.22396e-05	suppressor	metastasis	Takahashi Y, Miyoshi Y, Takahata C, Irahara N, Taguchi T, Tamaki Y, Noguchi S.Down-regulation of LATS1 and LATS2 mRNA expression by promoter hypermethylation and its association with biologically aggressive phenotype in human breast cancers.Clin Cancer Res. 2005;11(4):1380-5.			LATS2
LOXL1	NM_005576	Homo sapiens lysyl oxidase-like 1 (LOXL1), mRNA [NM_005576]	-23.2421	3.25481e-05	suppressor	metastasis	Yang H, Rouse J, Lukes L, Lancaster M, Veenstra T, Zhou M, Shi Y, Park YG, Hunter K.Caffeine suppresses metastasis in a transgenic mouse model: a prototype molecule for prophylaxis of metastasis.Clin Exp Metastasis. 2004;21(8):719-35.			LOXL1
LSR	NM_205834	Homo sapiens lipolysis stimulated lipoprotein receptor (LSR), transcript variant 2, mRNA [NM_205834]	-16.5886	9.06951e-05	suppressor	metastasis	Herbsleb M, Birkenkamp-Demtroder K, Thykjaer T, Wiuf C, Hein AM, Orntoft TF, Dyrskjøt L.Increased cell motility and invasion upon knockdown of lipolysis stimulated lipoprotein receptor (LSR) in SW780 bladder cancer cells.BMC Med Genomics. 2008;1:31.			LSR
MTSS1	NM_014751	Homo sapiens metastasis suppressor 1 (MTSS1), mRNA [NM_014751]	-29.3168	5.79349e-05	suppressor	metastasis	Yamashita S, Tsujino Y, Moriguchi K, Tatematsu M, Ushijima T.Chemical genomic screening for methylation-silenced genes in gastric cancer cell lines using 5-aza-2'-deoxycytidine treatment and oligonucleotide microarray.Cancer Sci. 2006;97(1):64-71.			MTSS1
NDRG1	NM_006096	Homo sapiens N-myc downstream regulated gene 1 (NDRG1), mRNA [NM_006096]	-33.6578	2.07876e-06	suppressor	metastasis	Iiizumi M, Liu W, Pai SK, Furuta E, Watabe K.Drug development against metastasis-related genes and their pathways: A rationale for cancer therapy.Biochim Biophys Acta. 2008. [Epub ahead of print]			NDRG1
PKP3	NM_007183	Homo sapiens plakophilin 3 (PKP3), mRNA [NM_007183]	-180.899	3.1644e-07	suppressor	metastasis	Aigner K, Descovich L, Mikula M, Sultan A, Dampier B, Bonné S, van Roy F, Mikulits W, Schreiber M, Brabletz T, Sommergruber W, Schweifer N, Wernitznig A, Beug H, Foisner R, Eger A.The transcription factor ZEB1 (deltaEF1) represses Plakophilin 3 during human cancer progression.FEBS Lett. 2007;581(8):1617-24.			PKP3
PTGS2	NM_000963	Homo sapiens prostaglandin-endoperoxide synthase 2 (prostaglandin G/H synthase and cyclooxygenase) (PTGS2), mRNA [NM_000963]	-23.5517	0.000145794	suppressor	metastasis	Lerebours F, Vacher S, Andrieu C, Espie M, Marty M, Lidereau R, Bieche I.NF-kappa B genes have a major role in inflammatory breast cancer.BMC Cancer. 2008;8:41.			PTGS2
RIN1	NM_004292	Homo sapiens Ras and Rab interactor 1 (RIN1), mRNA [NM_004292]	-3.00187	0.0109266	suppressor	metastasis	Milstein M, Mooser CK, Hu H, Fejzo M, Slamon D, Goodglick L, Dry S, Colicelli J.RIN1 is a breast tumor suppressor gene.Cancer Res. 2007;67(24):11510-6.			RIN1
S100A10	NM_002966	Homo sapiens S100 calcium binding protein A10 (S100A10), mRNA [NM_002966]	-5.66967	0.000745611	suppressor	metastasis	Ito Y, Arai K, Nozawa R, Yoshida H, Higashiyama T, Takamura Y, Miya A, Kobayashi K, Kuma K, Miyauchi A.S100A10 expression in thyroid neoplasms originating from the follicular epithelium: contribution to the aggressive characteristic of anaplastic carcinoma.Anticancer Res. 2007;27(4C):2679-83.			S100A10
SASH1	NM_015278	Homo sapiens SAM and SH3 domain containing 1 (SASH1), mRNA [NM_015278]	-28.6412	0.000142436	suppressor	metastasis	Rimkus C, Martini M, Friederichs J, Rosenberg R, Doll D, Siewert JR, Holzmann B, Janssen KP.Prognostic significance of downregulated expression of the candidate tumour suppressor gene SASH1 in colon cancer.Br J Cancer. 2006;95(10):1419-23.			SASH1
SEMA3F	NM_004186	Homo sapiens sema domain, immunoglobulin domain (Ig), short basic domain, secreted, (semaphorin) 3F (SEMA3F), mRNA [NM_004186]	-4.07109	0.000138715	suppressor	metastasis	Bielenberg DR, Hida Y, Shimizu A, Kaipainen A, Kreuter M, Kim CC, Klagsbrun M.Semaphorin 3F, a chemorepulsant for endothelial cells, induces a poorly vascularized, encapsulated, nonmetastatic tumor phenotype.J Clin Invest. 2004;114(9):1260-71.			SEMA3F
STC2	NM_003714	Homo sapiens stanniocalcin 2 (STC2), mRNA [NM_003714]	-122.377	0.000418305	suppressor	metastasis	Raulic S, Ramos-Valdes Y, DiMattia GE.Stanniocalcin 2 expression is regulated by hormone signalling and negatively affects breast cancer cell viability in vitro.J Endocrinol. 2008;197(3):517-29.			STC2
TIMP4	NM_003256	Homo sapiens TIMP metallopeptidase inhibitor 4 (TIMP4), mRNA [NM_003256]	-10.6693	0.00442224	suppressor	metastasis	Wang M, Liu YE, Greene J, Sheng S, Fuchs A, Rosen EM, Shi YE.Inhibition of tumor growth and metastasis of human breast cancer cells transfected with tissue inhibitor of metalloproteinase 4.Oncogene. 1997;14(23):2767-74.			TIMP4
TNFRSF10C	NM_003841	Homo sapiens tumor necrosis factor receptor superfamily, member 10c, decoy without an intracellular domain (TNFRSF10C), mRNA [NM_003841]	-9.56353	0.00178879	suppressor	metastasis	Macartney-Coxson DP, Hood KA, Shi HJ, Ward T, Wiles A, O'Connor R, Hall DA, Lea RA, Royds JA, Stubbs RS, Rooker S.Metastatic susceptibility locus, an 8p hot-spot for tumour progression disrupted in colorectal liver metastases: 13 candidate genes examined at the DNA, mRNA and protein level.BMC Cancer. 2008;8:187.			TNFRSF10C
